# Supplementary material for: Selective synthesis of pyridazine-fused chromones and 3-pyridazinyl chromones through intermolecular chromone annulation of o-hydroxyphenylenaminones with aryldiazonium salts
Source: Royal Society of Chemistry journal article supplement (doi:10.1039/d4qo00677a), 2024-01-01
Supplement: d4qo00677a1.pdf [file d4qo00677a1.pdf]

## Supporting Information

### Selective synthesis of pyridazin-fused chromones and 3-pyridazinyl chromones through intermolecular chromone annulation of *o*-hydroxyphenylenaminones with aryldiazonium salts

Siyu Song, Zhilai Zhang, Menglin Peng, Xueshan Xia\*, Shuwei Dong\*, Yongchao Wang\* and Fuchao Yu\*

#### Table of Contents

|                                                                                    |     |
|------------------------------------------------------------------------------------|-----|
| 1. General information. ....                                                       | 2   |
| 2. Optimization of reaction conditions. ....                                       | 3   |
| 3. General procedure. ....                                                         | 5   |
| 4. Spectroscopic data.....                                                         | 12  |
| 5. X-ray Structure and Data.....                                                   | 32  |
| 6. <sup>1</sup> H NMR and <sup>13</sup> C NMR spectra for spectroscopic data. .... | 34  |
| 7. References and notes.....                                                       | 123 |

## 1. General information.

All compounds were fully characterized by spectroscopic data. The NMR spectra were recorded on a DRX600 ( $^1\text{H}$ : 600 MHz,  $^{13}\text{C}$ : 150 MHz) and a AV500 ( $^1\text{H}$ : 500 MHz,  $^{13}\text{C}$ : 125 MHz), chemical shifts ( $\delta$ ) are expressed in ppm, and  $J$  values are given in Hz, and deuterated  $\text{CDCl}_3$ ,  $\text{DMSO-}d_6$  were used as solvent. The reactions were monitored by thin layer chromatography (TLC) using silica gel GF<sub>254</sub>. The melting points were determined on XT-4A melting point apparatus and are uncorrected. HRMs were performed on an Agilent LC/MS TOF instrument.

All chemicals and solvents were used as received without further purification unless otherwise stated. Column chromatography was performed on silica gel (200–300 mesh).

*o*-Hydroxyphenylenaminones **1** were prepared according to the literature<sup>1</sup>, aryldiazonium salts **2** were prepared according to the literature<sup>2</sup>. Other reagents were purchased from Energy Chemical and Adamas-beta®.

## 2. Optimization of reaction conditions.

**Table S1.** Optimization of the Pyridazin-fused Chromones.<sup>a</sup>

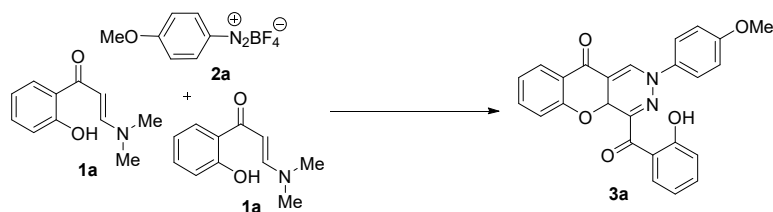

| Entry | Additive (eq.)                                           | Solvent     | T (°C) | Atmosphere     | Yield <sup>b</sup> (%) |
|-------|----------------------------------------------------------|-------------|--------|----------------|------------------------|
| 1     | -                                                        | MeCN        | r.t.   | N <sub>2</sub> | 48                     |
| 2     | CuI (1.0)                                                | MeCN        | r.t.   | N <sub>2</sub> | 43                     |
| 3     | NaIO <sub>3</sub> (1.0)                                  | MeCN        | r.t.   | N <sub>2</sub> | 51                     |
| 4     | CuCl (1.0)                                               | MeCN        | r.t.   | N <sub>2</sub> | 22                     |
| 5     | (CF <sub>3</sub> SO <sub>3</sub> ) <sub>3</sub> Fe (1.0) | MeCN        | r.t.   | N <sub>2</sub> | 32                     |
| 6     | I <sub>2</sub> (1.0)                                     | MeCN        | r.t.   | N <sub>2</sub> | 55                     |
| 7     | AcOH (1.0)                                               | MeCN        | r.t.   | N <sub>2</sub> | 31                     |
| 8     | TFA (1.0)                                                | MeCN        | r.t.   | N <sub>2</sub> | 18                     |
| 9     | TsOH·H <sub>2</sub> O (1.0)                              | MeCN        | r.t.   | N <sub>2</sub> | 49                     |
| 10    | Adipic acid (1.0)                                        | MeCN        | r.t.   | N <sub>2</sub> | 33                     |
| 11    | Trifluoroacetic anhydride (1.0)                          | MeCN        | r.t.   | N <sub>2</sub> | 39                     |
| 12    | TfOH (1.0)                                               | MeCN        | r.t.   | N <sub>2</sub> | 51                     |
| 13    | Benzoic anhydride (1.0)                                  | MeCN        | r.t.   | N <sub>2</sub> | 63                     |
| 14    | Difluoroacetic anhydride (1.0)                           | MeCN        | r.t.   | N <sub>2</sub> | 38                     |
| 15    | Chloroacetic anhydride (1.0)                             | MeCN        | r.t.   | N <sub>2</sub> | 42                     |
| 16    | 4-Nitrobenzoic acid (1.0)                                | MeCN        | r.t.   | N <sub>2</sub> | n.d.                   |
| 17    | H <sub>2</sub> SO <sub>4</sub> (1.0)                     | MeCN        | r.t.   | N <sub>2</sub> | n.d.                   |
| 18    | Isobutyric acid (1.0)                                    | MeCN        | r.t.   | N <sub>2</sub> | 53                     |
| 19    | Isobutyric anhydride (1.0)                               | MeCN        | r.t.   | N <sub>2</sub> | 92                     |
| 20    | Succinic anhydride (1.0)                                 | MeCN        | r.t.   | N <sub>2</sub> | 93                     |
| 21    | Diethylamine (1.0)                                       | MeCN        | r.t.   | N <sub>2</sub> | 32                     |
| 22    | Succinic anhydride (0.2)                                 | MeCN        | r.t.   | N <sub>2</sub> | 51                     |
| 23    | Succinic anhydride (0.5)                                 | MeCN        | r.t.   | N <sub>2</sub> | 54                     |
| 24    | Succinic anhydride (0.8)                                 | MeCN        | r.t.   | N <sub>2</sub> | 86                     |
| 25    | Succinic anhydride (1.2)                                 | MeCN        | r.t.   | N <sub>2</sub> | 91                     |
| 26    | Succinic anhydride (1.0)                                 | DCM         | r.t.   | N <sub>2</sub> | 81                     |
| 27    | Succinic anhydride (1.0)                                 | 1,4-dioxane | r.t.   | N <sub>2</sub> | 46                     |
| 28    | Succinic anhydride (1.0)                                 | DMSO        | r.t.   | N <sub>2</sub> | 48                     |
| 29    | Succinic anhydride (1.0)                                 | Toluene     | r.t.   | N <sub>2</sub> | 42                     |
| 30    | Succinic anhydride (1.0)                                 | THF         | r.t.   | N <sub>2</sub> | n.r.                   |
| 31    | Succinic anhydride (1.0)                                 | Xylene      | r.t.   | N <sub>2</sub> | n.r.                   |
| 32    | Succinic anhydride (1.0)                                 | MeCN        | r.t.   | Air            | 90                     |
| 33    | Succinic anhydride (1.0)                                 | MeCN        | r.t.   | O <sub>2</sub> | 84                     |
| 34    | Succinic anhydride (1.0)                                 | MeCN        | 40     | N <sub>2</sub> | 67                     |

<sup>a</sup>Reaction conditions: **1a** (0.21 mmol), **2a** (0.1 mmol), catalyst and additive in 2 ml of solvent for 8.0 h. <sup>b</sup>Isolated yields.

**Table S2.** Optimization of the 3-Pyridazinyl-chromones.<sup>a</sup>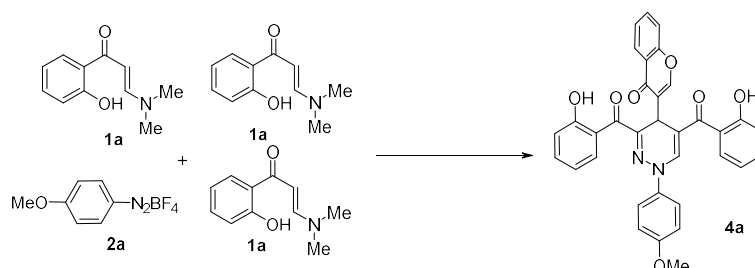

| Entry | Additive (eq.)                  | 1a (eq.) | Solvent           | T (°C) | Atmosphere     | Yield <sup>b</sup> (%) |
|-------|---------------------------------|----------|-------------------|--------|----------------|------------------------|
| 1     | -                               | 3.0      | MeCN              | r.t.   | Air            | n.d.                   |
| 2     | Isobutyric acid (1.0)           | 3.0      | MeCN              | r.t.   | Air            | 14                     |
| 3     | TsOH·H <sub>2</sub> O (1.0)     | 3.0      | MeCN              | r.t.   | Air            | 24                     |
| 4     | TfOH (1.0)                      | 3.0      | MeCN              | r.t.   | Air            | 39                     |
| 5     | AcOH (1.0)                      | 3.0      | MeCN              | r.t.   | Air            | 38                     |
| 6     | TFA (1.0)                       | 3.0      | MeCN              | r.t.   | Air            | trace                  |
| 7     | Benzoic anhydride (1.0)         | 3.0      | MeCN              | r.t.   | Air            | 32                     |
| 8     | Trifluoroacetic anhydride (1.0) | 3.0      | MeCN              | r.t.   | Air            | 19                     |
| 9     | Caproic anhydride (1.0)         | 3.0      | MeCN              | r.t.   | Air            | trace                  |
| 10    | Isobutyric anhydride (1.0)      | 3.0      | MeCN              | r.t.   | Air            | 16                     |
| 11    | Ac <sub>2</sub> O (1.0)         | 3.0      | MeCN              | r.t.   | Air            | trace                  |
| 12    | Difluoroacetic anhydride (1.0)  | 3.0      | MeCN              | r.t.   | Air            | 21                     |
| 13    | Chloroacetic anhydride (1.0)    | 3.0      | MeCN              | r.t.   | Air            | 43                     |
| 14    | Succinic anhydride (1.0)        | 3.0      | MeCN              | r.t.   | Air            | 48                     |
| 15    | Succinic anhydride (1.0)        | 3.0      | MeCN              | 50     | Air            | 53                     |
| 16    | Succinic anhydride (1.0)        | 3.0      | MeCN              | 80     | Air            | 72                     |
| 17    | Succinic anhydride (1.0)        | 3.0      | MeCN              | 110    | Air            | 60                     |
| 18    | Succinic anhydride (0.5)        | 3.0      | MeCN              | 80     | Air            | 39                     |
| 19    | Succinic anhydride (1.5)        | 3.0      | MeCN              | 80     | Air            | 65                     |
| 20    | Succinic anhydride (1.0)        | 3.0      | Toluene           | 80     | Air            | 31                     |
| 21    | Succinic anhydride (1.0)        | 3.0      | EA                | 80     | Air            | 35                     |
| 22    | Succinic anhydride (1.0)        | 3.0      | DCM               | 80     | Air            | 28                     |
| 23    | Succinic anhydride (1.0)        | 3.0      | Acetone           | 80     | Air            | n.d.                   |
| 24    | Succinic anhydride (1.0)        | 3.0      | EtOH              | 80     | Air            | n.d.                   |
| 25    | Succinic anhydride (1.0)        | 3.0      | THF               | 80     | Air            | n.d.                   |
| 26    | Succinic anhydride (1.0)        | 3.0      | 1,4-dioxane       | 80     | Air            | 43                     |
| 27    | Succinic anhydride (1.0)        | 3.0      | Et <sub>2</sub> O | 80     | Air            | 50                     |
| 28    | Succinic anhydride (1.0)        | 3.0      | DMSO              | 80     | Air            | 31                     |
| 29    | Succinic anhydride (1.0)        | 3.0      | DMF               | 80     | Air            | 46                     |
| 30    | Succinic anhydride (1.0)        | 3.0      | MeCN              | 80     | N <sub>2</sub> | 75                     |
| 31    | Succinic anhydride (1.0)        | 3.0      | MeCN              | 80     | O <sub>2</sub> | 63                     |
| 32    | Succinic anhydride (1.0)        | 3.5      | MeCN              | 80     | N <sub>2</sub> | 79                     |
| 33    | Succinic anhydride (1.0)        | 4.0      | MeCN              | 80     | N <sub>2</sub> | 81                     |
| 34    | Succinic anhydride (1.0)        | 4.5      | MeCN              | 80     | N <sub>2</sub> | 80                     |
| 35    | -                               | 4.5      | MeCN              | 80     | N <sub>2</sub> | 51                     |

<sup>a</sup>Reaction conditions: **1a** (x mmol), **2a** (0.1 mmol), catalyst and additive in 2 ml of solvent for 15.0 h. <sup>b</sup>Isolated yields.

### 3. General procedure.

#### 3.1 Synthesis of Pyridazin-fused Chromones 3.

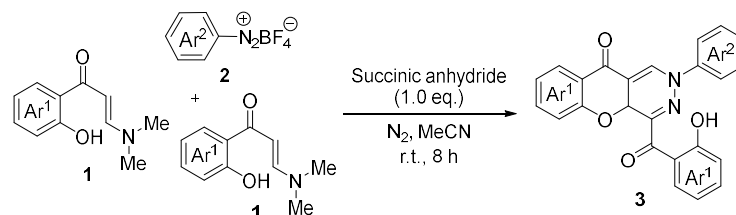

*o*-Hydroxyarylenaminones **1** (0.21 mmol), aryldiazonium salts **2** (0.1 mmol), Succinic anhydride (0.1 mmol), and MeCN (2.0 mL) were charged into a 10 mL Ace Glass pressure tubes, and the mixture was stirred at r.t. for 8.0 h until aryldiazonium salts were completely consumed. Then EtOAc (15 mL × 2) were added. The organic phase was washed with water (10 mL), dried over Na<sub>2</sub>SO<sub>4</sub>, concentrated and purified by flash column chromatography to afford pyridazin-fused chromones **3**. (The separation can also be obtained by filtration, but the purity is not satisfactory).

#### 3.2 Synthesis of 3-Pyridazinyl-chromones 4.

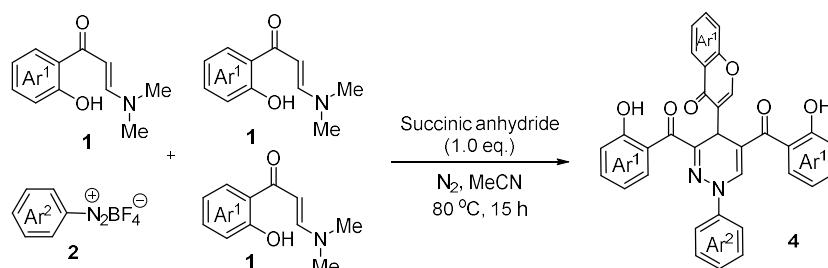

*o*-Hydroxyarylenaminones **1** (2.0 mmol), aryldiazonium salts **2** (0.5 mmol), Succinic anhydride (0.5 mmol), and MeCN (2.0 mL) were charged into a 10 mL Ace Glass pressure tubes, and the mixture was stirred at 80 °C for 15.0 h until aryldiazonium salts were completely consumed. The mixture was cooled to room temperature, and then EtOAc (15 mL × 2) were added. The organic phase was washed with water (10 mL), dried over Na<sub>2</sub>SO<sub>4</sub>, concentrated and purified by flash column chromatography to afford 3-Pyridazinyl-chromones **4**. (The separation can also be obtained by filtration, but the purity is not satisfactory).

#### 3.3 Gram-scale synthesis of Pyridazin-fused Chromones 3a.

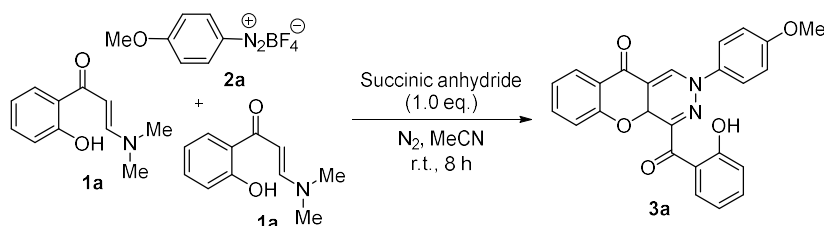

*o*-Hydroxyarylenaminones **1a** (6.3 mmol), aryldiazonium salts **2a** (3.0 mmol), Succinic anhydride (3.0 mmol), and MeCN (20.0 mL) were charged into a 100 mL Ace Glass

pressure tubes, and the mixture was stirred at r.t. for 8.0 h until aryldiazonium salts were completely consumed. Then EtOAc (15 mL × 2) were added. The organic phase was washed with water (10 mL), dried over Na<sub>2</sub>SO<sub>4</sub>, concentrated and purified by flash column chromatography to afford pyridazin-fused chromone **3a**.

### 3.4 Gram-scale synthesis of 3-Pyridazinyl-chromones **4a**.

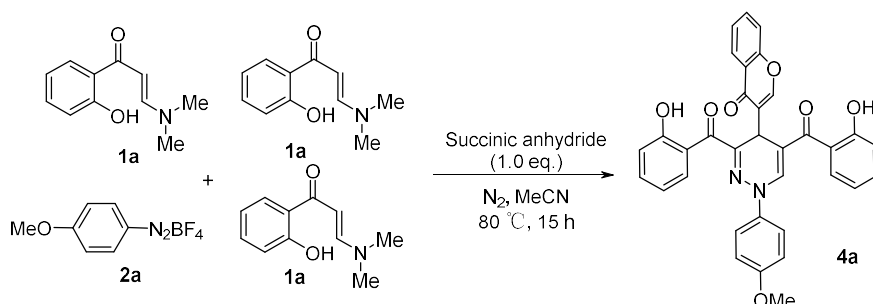

*o*-Hydroxyarylenaminones **1a** (12.0 mmol), aryldiazonium salts **2a** (3.0 mmol), Succinic anhydride (3.0 mmol), and MeCN (20.0 mL) were charged into a 100 mL Ace Glass pressure tubes, and the mixture was stirred at 80 °C for 15.0 h until aryldiazonium salts were completely consumed. The mixture was cooled to room temperature, and then EtOAc (15 mL × 2) were added. The organic phase was washed with water (10 mL), dried over Na<sub>2</sub>SO<sub>4</sub>, concentrated and purified by flash column chromatography to afford 3-pyridazinyl-chromone **4a**.

### 3.5 Antiviral activity against HCoV-OC43.

#### *Drugs*

ARB tablets (0.1 g per tablet) were purchased from CSPC Ouyi Pharmaceutical Co., Ltd. ARB and candidate drugs were dissolved in dimethyl sulfoxide (DMSO) and stored at – 20°C before use.

#### *Cell lines and virus*

The human rectal carcinoma cell line HRT-18 (ATCC CCL-244) was cultured in Roswell Park Memorial Institute 1640 medium (RPMI 1640, Hyclone, USA). The lung adenocarcinoma cell line A549 (ATCC CCL-185) was cultured in Dulbecco's modified Eagle's medium (DMEM, Gibco, USA). All cells were cultured in medium supplemented with 10% fetal bovine serum (FBS), 100 U/ml penicillin, and 100 µg/ml streptomycin (Gibco, USA). HCoV-OC43 (VR-1558) was propagated in HRT-18 cell and the 50% tissue culture infective dose (TCID<sub>50</sub>) was calculated by using the Reed-Muench method as previously described.<sup>3</sup> Viral stocks were stored at – 80°C. This viral infection was conducted in BSL-2 laboratory.

#### *Cytotoxicity assay*

The cytotoxic effects of drugs on A549 cells were measured by cell counting Kit-8 (CCK-8) (Beyotime, China). Cell monolayer grown in 96-well plates was incubated

with indicated concentrations of drugs. After 48 h, 10  $\mu\text{L}$  of CCK-8 reagent was added into each well and culture at 37  $^{\circ}\text{C}$  for 40 min. The absorbance at 450 nm was measured by using a Multiskan GO Microplate Spectrophotometer (Thermo Fisher, USA). The 50% cytotoxic concentration ( $\text{CC}_{50}$ ) of drugs to cells was calculated by the GraphPad Prism 8.0 software.

#### *Cytopathic effect (CPE) inhibition assay*

The cell monolayer cultured in 96-well plates was inoculated with 100  $\text{TCID}_{50}$  of HCoV-OC43 at 34 $^{\circ}\text{C}$  for 3 h. After removing the inoculums, cells were treated with indicated concentrations of drugs in culture medium with 2%FBS at 34 $^{\circ}\text{C}$  in a 5% $\text{CO}_2$  incubator. At 7 dpi, the cell viability was detected by CCK-8 assay to calculate the 50% inhibitory concentration ( $\text{IC}_{50}$ ) of agents against CPE via the Reed-Muench method. The cytotoxicity and antiviral effects of **3b** and **3g** in A549 cells infected with HCoV-OC43 are shown in the figure below.

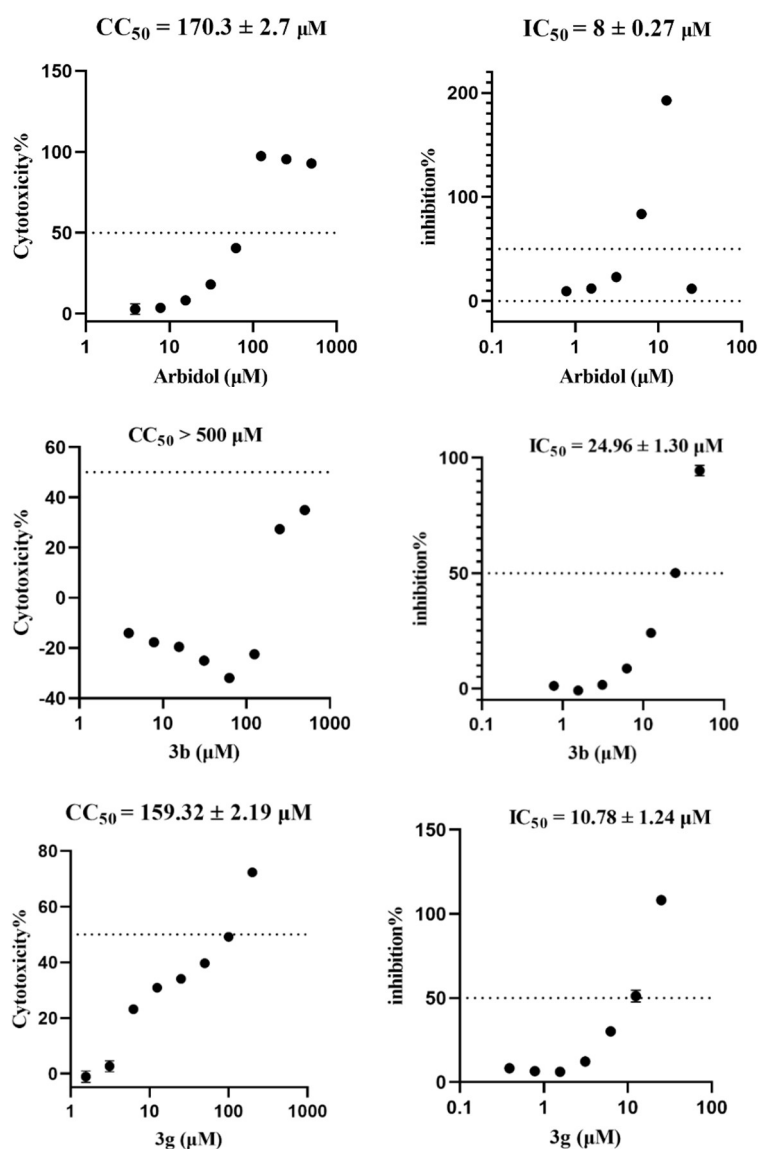

### 3.6 The NMR A value for OH groups in o-hydroxyarylenaminones.

$$\Delta\delta = \delta(\text{DMSO}) - \delta(\text{CDCl}_3); A_{\text{NMR}} = 0.0065 + 0.133\Delta\delta$$

There is a clear distinction between aromatic OH groups that do not form an intraHB, which have  $A_{\text{NMR}} > 0.5$ , and OH groups that form a strong intraHB, which have  $A_{\text{NMR}} < 0.1$ .<sup>4</sup>

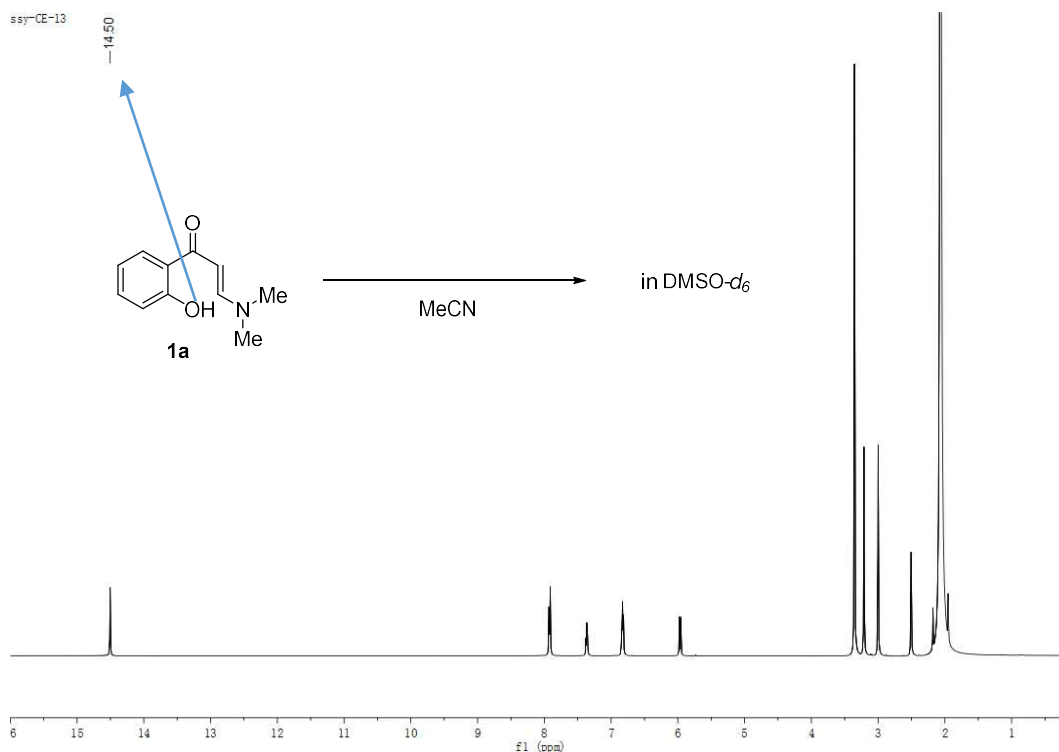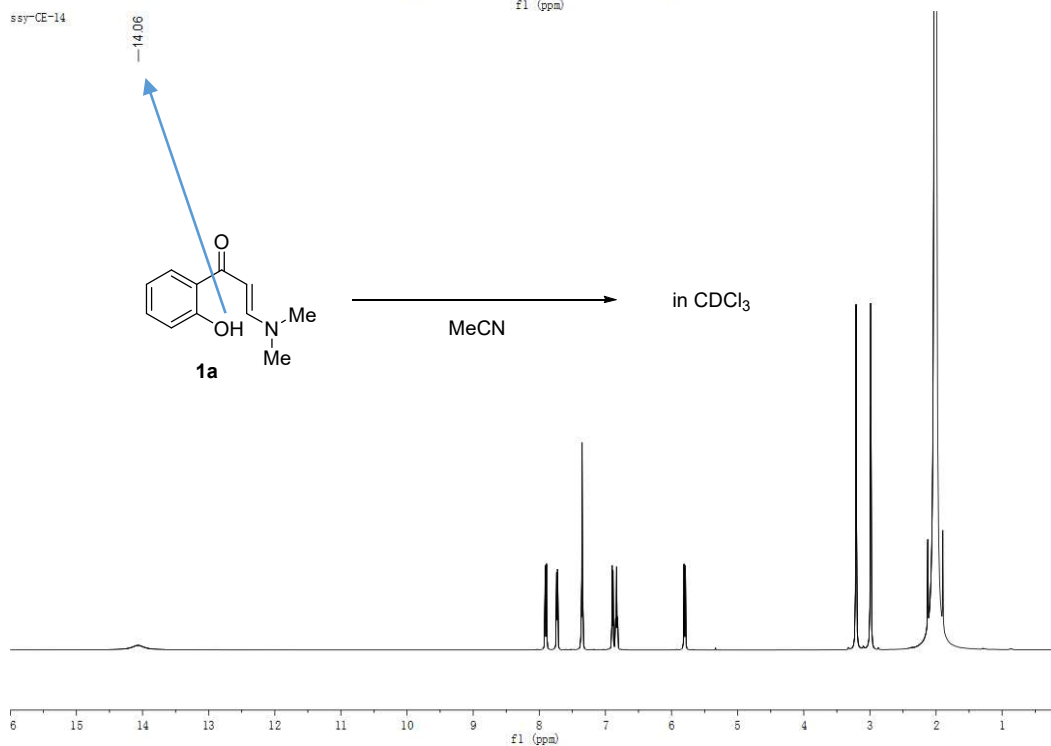

$\Delta\delta = 14.50 - 14.06 = 0.44$ ;  $A_{\text{NMR}} = 0.0065 + 0.133 * 0.44 = 0.06502 (< 0.1)$ , the OH group form a strong intraHB.



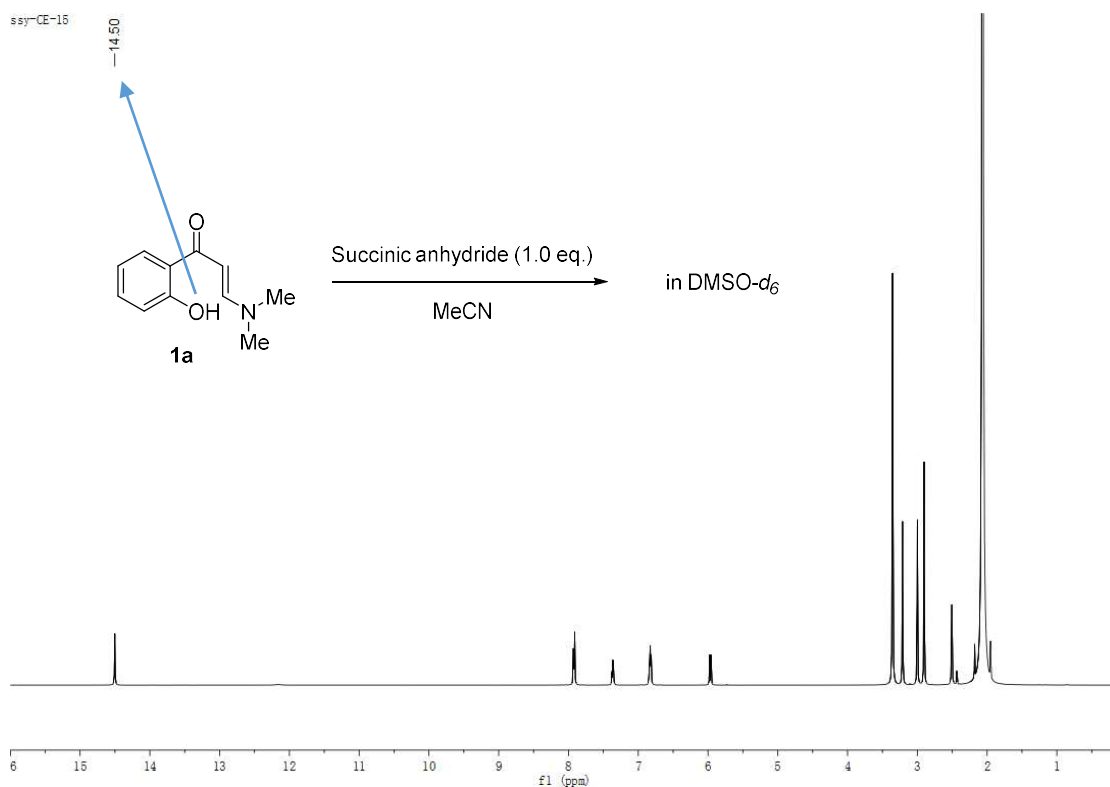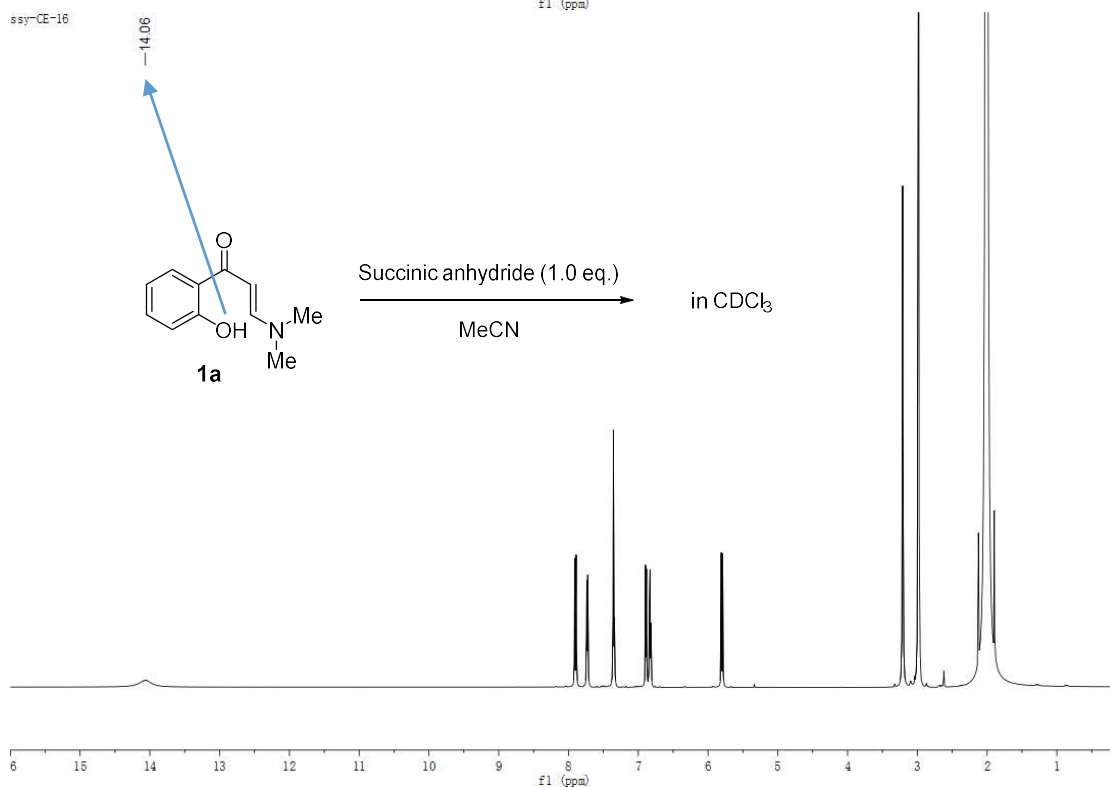

$\Delta\delta = 14.50 - 14.06 = 0.44$ ;  $A_{\text{NMR}} = 0.0065 + 0.133 * 0.47 = 0.06502 (< 0.1)$ , the OH group form a strong intraHB.

The ANMR value did not change by the addition of SA, suggesting that the strong intramolecular hydrogen bond of o-HPEs would not be affected by SA.

### 3.7 Synthesis of 3-diazenyl chromone 6.

*o*-Hydroxyarylenaminones **1a** (0.1 mmol), aryldiazonium salts **2a** (0.1 mmol), and MeCN (1.0 mL) were charged into a 10 mL Ace Glass pressure tubes, and the mixture was stirred at room temperature for 30 min. The reaction mixture contained solid sediment and the 3-diazenyl chromone product **6** was obtained by filtration. 3-Diazenyl chromone product **6** is an unstable mixture that can be detected by HRMS.

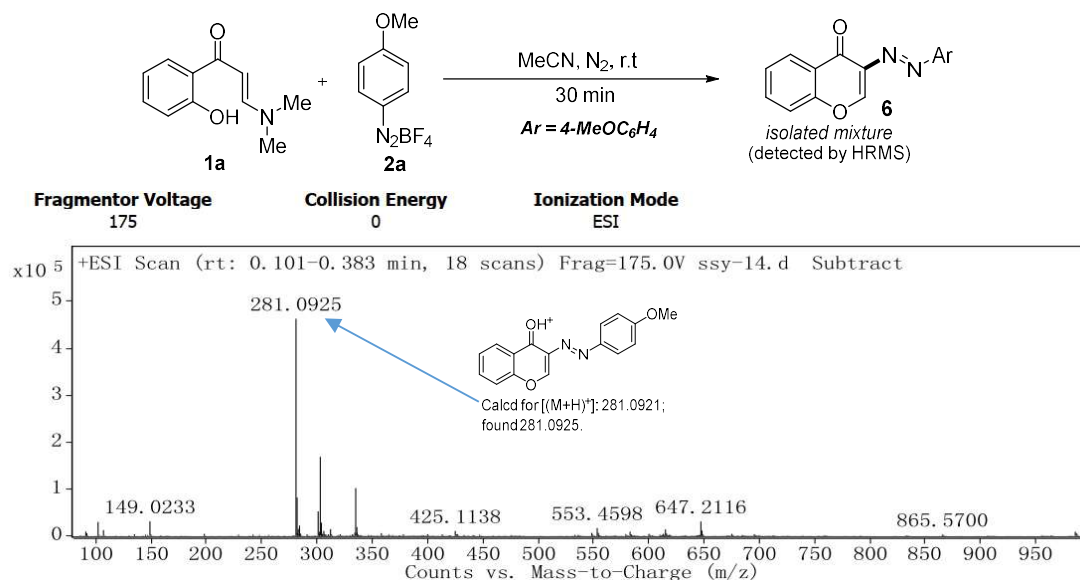

### 3.8 Synthesis of 3-pyridazinyl chromone 4t.

Pyridazin-fused chromone **3a** (0.4 mmol), *o*-hydroxyarylenaminones **1m** (0.4 mmol), Succinic anhydride (0.4 mmol), and MeCN (2.0 mL) were charged into a 10 mL Ace Glass pressure tubes, and the mixture was stirred at 80 °C for 36 h until pyridazin-fused chromone **3a** were completely consumed. Then EtOAc (15 mL × 2) were added. The organic phase was washed with water (10 mL), dried over Na<sub>2</sub>SO<sub>4</sub>, concentrated and purified by flash column chromatography to afford 3-pyridazinyl chromone **4t**.

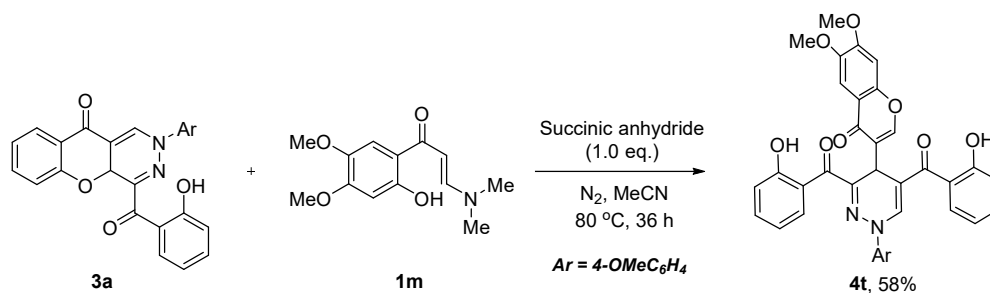

### 3.9 Another proposed mechanism.

The intermolecular addition reaction of *o*-HPEs **1** and aryldiazonium salts **2** was initiated to give intermediates **A**, which followed to isomerize to form **A'**. Next, the intermolecular nucleophilic addition of intermediate **A'** with another molecular **1** was executed to give intermediate **B**, followed by the intramolecular cyclization lead to the formation of pyridazin-precursor intermediate **C**. The subsequent deamination,

intramolecular cyclization, and deamination-dehydrogenation were performed sequentially, leading to the formation of desired pyridazin-fused chromanones **3**.

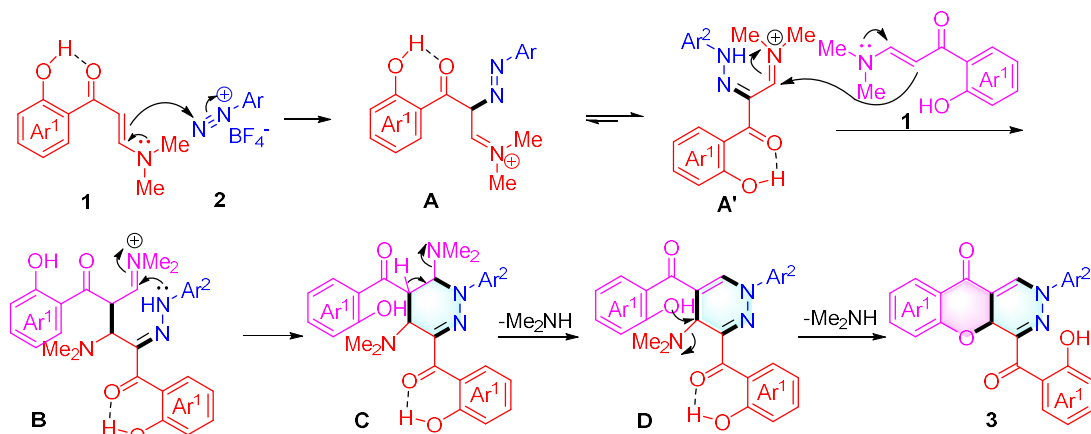

**Scheme S1.** Proposed mechanism.

## 4. Spectroscopic data.

### 4.1 Spectroscopic data of Pyridazin-fused Chromones.

#### 4-(2-Hydroxybenzoyl)-2-(4-methoxyphenyl)-2,4a-dihydro-10H-chromeno[2,3-d]pyridazin-10-one (3a)

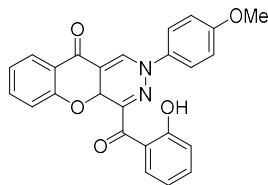

$V_{\text{Petroleum ether}}/V_{\text{Ethyl acetate}} = 10:1$ ,  $R_f = 0.25$ ; Yellow solid: 40 mg (93%); mp = 143–144 °C;  $^1\text{H NMR}$  (600 MHz,  $\text{CDCl}_3$ ):  $\delta = 11.82$  (s, 1H, ArOH), 8.20 (s, 1H, C=CH), 7.99 (s, 2H, ArH), 7.57 (t,  $J = 7.4$  Hz, 1H, ArH), 7.52 (t,  $J = 7.3$  Hz, 1H, ArH), 7.37 (d,  $J = 8.8$  Hz, 2H, ArH), 7.09 (t,  $J = 8.9$  Hz, 2H, ArH), 6.99–6.93 (m, 4H, ArH), 6.41 (s, 1H, C–CH), 3.83 (s, 3H,  $\text{ArOCH}_3$ );  $^{13}\text{C NMR}$  (150 MHz,  $\text{CDCl}_3$ )  $\delta = 193.2$ , 181.2, 163.8, 158.3, 157.6, 140.3, 137.1, 136.6, 136.0, 133.2, 129.0, 127.3, 123.4, 122.3, 120.3, 120.3, 118.9, 118.5, 118.5, 118.4, 114.7, 114.7, 109.5, 64.2, 55.6; HRMS (TOF ES<sup>+</sup>): m/z calcd for  $\text{C}_{25}\text{H}_{19}\text{N}_2\text{O}_5$  [(M+H)<sup>+</sup>], 427.1288, found, 427.1309.

#### 4-(2-Hydroxy-5-methylbenzoyl)-2-(4-methoxyphenyl)-8-methyl-2,4a-dihydro-10H-chromeno[2,3-d]pyridazin-10-one (3b)

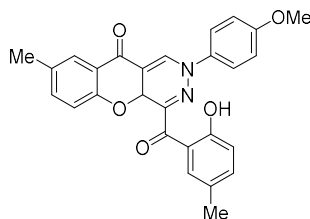

$V_{\text{Petroleum ether}}/V_{\text{Ethyl acetate}} = 10:1$ ,  $R_f = 0.25$ ; Yellow solid: 42 mg (92%); mp = 178–179 °C;  $^1\text{H NMR}$  (600 MHz,  $\text{CDCl}_3$ ):  $\delta = 11.63$  (s, 1H, ArOH), 8.00 (d,  $J = 13.4$  Hz, 2H, ArH), 7.78 (s, 1H, C=CH), 7.39–7.35 (m, 3H, ArH), 7.32 (d,  $J = 6.1$  Hz, 1H, ArH), 6.98 (d,  $J = 7.0$  Hz, 1H, ArH), 6.96–6.92 (m, 2H, ArH), 6.84 (d,  $J = 7.1$  Hz, 1H, ArH), 6.34 (s, 1H, C–CH), 3.83 (s, 3H,  $\text{ArOCH}_3$ ), 2.34 (s, 6H,  $\text{ArCH}_3$ );  $^{13}\text{C NMR}$  (125 MHz,  $\text{CDCl}_3$ ):  $\delta = 193.2$ , 181.3, 161.8, 158.3, 155.7, 140.5, 138.1, 137.6, 136.2, 132.9, 131.8, 128.9, 127.9, 126.9, 123.1, 120.2, 120.2, 118.3, 118.3, 118.2, 114.8, 114.8, 109.7, 64.2, 55.6, 20.6, 20.5; HRMS (TOF ES<sup>+</sup>): m/z calcd for  $\text{C}_{27}\text{H}_{23}\text{N}_2\text{O}_5$  [(M+H)<sup>+</sup>], 455.1601, found, 455.1603.

#### 8-Chloro-4-(5-chloro-2-hydroxybenzoyl)-2-(4-methoxyphenyl)-2,4a-dihydro-10H-chromeno[2,3-d]pyridazin-10-one (3c)

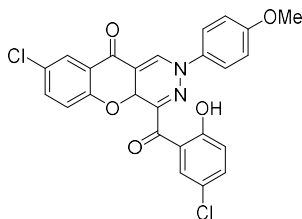

$V_{\text{Petroleum ether}}/V_{\text{Ethyl acetate}} = 10:1$ ,  $R_f = 0.25$ ; Yellow solid: 33 mg (67%); mp = 140–141 °C;  $^1\text{H NMR}$  (500 MHz,  $\text{CDCl}_3$ ):  $\delta = 11.66$  (s, 1H, ArOH), 8.28 (s, 1H, C=CH), 7.97 (s, 1H, ArH), 7.94 (s, 1H, ArH), 7.50 (d,  $J = 7.4$  Hz, 1H, ArH), 7.45 (d,  $J = 7.0$  Hz, 1H, ArH), 7.37 (d,  $J = 8.6$  Hz, 2H, ArH),

7.03 (d,  $J = 8.9$  Hz, 1H, ArH), 6.97 (d,  $J = 8.7$  Hz, 2H, ArH), 6.91 (d,  $J = 8.7$  Hz, 1H, ArH), 6.37 (s, 1H, C–CH), 3.84 (s, 3H, ArOCH<sub>3</sub>); <sup>13</sup>C NMR (150 MHz, CDCl<sub>3</sub>):  $\delta = 191.7, 180.0, 162.2, 158.6, 155.9, 139.8, 136.8, 136.5, 135.8, 132.4, 129.6, 127.9, 126.8, 124.1, 123.7, 120.6, 120.6, 120.3, 120.1, 118.8, 114.9, 114.9, 109.4, 64.1, 55.7$ ; HRMS (TOF ES<sup>+</sup>):  $m/z$  calcd for C<sub>25</sub>H<sub>17</sub>Cl<sub>2</sub>N<sub>2</sub>O<sub>5</sub> [(M+H)<sup>+</sup>], 495.0509, found, 495.0507.

**8-Bromo-4-(5-bromo-2-hydroxybenzoyl)-2-(4-methoxyphenyl)-2,4a-dihydro-10H-chromeno[2,3-d]pyridazin-10-one (3d)**

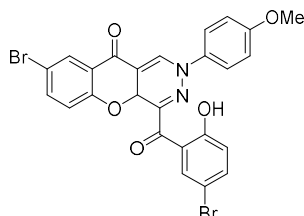

$V_{\text{Petroleum ether}}/V_{\text{Ethyl acetate}} = 10:1$ ,  $R_f = 0.25$ ; Yellow solid: 24 mg (41%); mp = 201–202°C; <sup>1</sup>H NMR (600 MHz, CDCl<sub>3</sub>):  $\delta = 11.68$  (s, 1H, ArOH), 8.45 (s, 1H, C=CH), 8.04 (d,  $J = 73.8$  Hz, 2H, ArH), 7.59 (s, 2H, ArH), 7.38 (s, 2H, ArH), 6.98 (s, 3H, ArH), 6.85 (s, 1H, ArH), 6.38 (s, 1H, C–CH), 3.84 (s, 3H, ArOCH<sub>3</sub>); <sup>13</sup>C NMR (150 MHz, CDCl<sub>3</sub>):  $\delta = 189.8, 178.2, 160.9, 156.9, 154.6, 137.9, 137.7, 137.5, 134.0, 133.7, 128.1, 127.8, 122.8, 118.8, 118.8, 118.8, 118.7, 117.7, 113.4, 113.1, 113.1, 108.8, 107.7, 62.3, 53.9$ ; HRMS (TOF ES<sup>+</sup>):  $m/z$  calcd for C<sub>25</sub>H<sub>17</sub>Br<sub>2</sub>N<sub>2</sub>O<sub>5</sub> [(M+H)<sup>+</sup>], 582.9499, found, 582.9494.

**4-(4-Hydroxy-[1,1'-biphenyl]-3-carbonyl)-2-(4-methoxyphenyl)-8-phenyl-2,4a-dihydro-10H-chromeno[2,3-d]pyridazin-10-one (3e)**

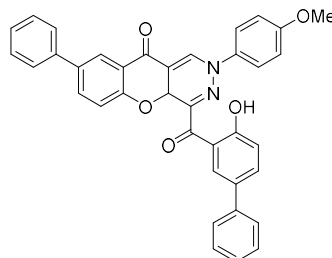

$V_{\text{Petroleum ether}}/V_{\text{Ethyl acetate}} = 8:1$ ,  $R_f = 0.25$ ; Yellow solid: 45 mg (77%); mp = 195–196°C; <sup>1</sup>H NMR (600 MHz, CDCl<sub>3</sub>):  $\delta = 11.91$  (s, 1H, ArOH), 8.58 (s, 1H, ArH), 8.23 (s, 1H, ArH), 8.00 (s, 1H, C=CH), 7.83–7.77 (m, 2H, ArH), 7.61 (d,  $J = 7.3$  Hz, 2H, ArH), 7.52 (d,  $J = 7.3$  Hz, 2H, ArH), 7.44 (t,  $J = 7.4$  Hz, 2H, ArH), 7.41–7.33 (m, 6H, ArH), 7.17 (d,  $J = 8.6$  Hz, 1H, ArH), 7.04 (d,  $J = 8.5$  Hz, 1H, ArH), 6.89 (d,  $J = 8.6$  Hz, 2H, ArH), 6.46 (s, 1H, C–CH), 3.82 (s, 3H, ArOCH<sub>3</sub>); <sup>13</sup>C NMR (150 MHz, CDCl<sub>3</sub>):  $\delta = 192.7, 181.3, 163.3, 158.4, 157.0, 140.3, 139.9, 139.5, 136.1, 135.8, 135.3, 135.3, 132.2, 131.8, 129.2, 128.9, 128.9, 128.9, 128.9, 127.5, 127.2, 126.8, 126.8, 126.7, 126.7, 125.4, 123.5, 120.7, 120.7, 119.1, 118.9, 118.5, 114.7, 114.7, 110.1, 64.2, 55.7$ ; HRMS (TOF ES<sup>+</sup>):  $m/z$  calcd for C<sub>37</sub>H<sub>27</sub>N<sub>2</sub>O<sub>5</sub> [(M+H)<sup>+</sup>], 579.1914, found, 579.1917.

**4-(2-Hydroxy-6-methoxybenzoyl)-9-methoxy-2-(4-methoxyphenyl)-2,4a-dihydro-10H-chromeno[2,3-d]pyridazin-10-one (3f)**

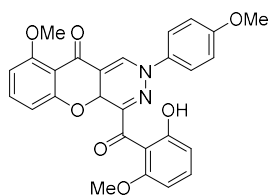

$V_{\text{Petroleum ether}}/V_{\text{Ethyl acetate}} = 10:1$ ,  $R_f = 0.25$ ; Yellow solid: 35 mg (72%); mp = 165–166°C;  $^1\text{H NMR}$  (600 MHz,  $\text{CDCl}_3$ ):  $\delta = 11.26$  (s, 1H, ArOH), 8.79 (s, 1H, C=CH), 7.75 (s, 1H, ArH), 7.71 (s, 1H, ArH), 7.46 (t,  $J = 8.3$  Hz, 1H, ArH), 7.36 (t,  $J = 8.3$  Hz, 1H, ArH), 6.90 (d,  $J = 8.4$  Hz, 1H, ArH), 6.85 (d,  $J = 8.9$  Hz, 1H, ArH), 6.70 (d,  $J = 8.2$  Hz, 1H, ArH), 6.61 (s, 1H, ArH), 6.49 (d,  $J = 8.3$  Hz, 1H, ArH), 6.35 (d,  $J = 8.2$  Hz, 1H, ArH), 5.61 (s, 1H, C–CH), 3.84 (s, 3H,  $\text{ArOCH}_3$ ), 3.77 (s, 3H,  $\text{ArOCH}_3$ ), 3.59 (s, 3H,  $\text{ArOCH}_3$ );  $^{13}\text{C NMR}$  (150 MHz,  $\text{CDCl}_3$ ):  $\delta = 195.3, 192.9, 176.3, 160.8, 159.9, 158.4, 157.8, 157.5, 152.9, 138.8, 137.1, 136.5, 133.6, 123.4, 119.8, 119.8, 114.5, 114.5, 110.6, 109.9, 106.4, 102.8, 101.8, 56.3, 55.9, 55.6, 29.9$ ; HRMS (TOF ES<sup>+</sup>):  $m/z$  calcd for  $\text{C}_{27}\text{H}_{23}\text{N}_2\text{O}_7$  [(M+H)<sup>+</sup>], 487.1500, found, 487.1500.

**7-Fluoro-4-(4-fluoro-2-hydroxybenzoyl)-2-(4-methoxyphenyl)-2,4a-dihydro-10H-chromeno[2,3-d]pyridazin-10-one (3g)**

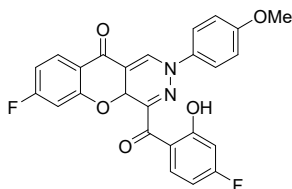

$V_{\text{Petroleum ether}}/V_{\text{Ethyl acetate}} = 10:1$ ,  $R_f = 0.25$ ; Red solid: 40 mg (86%); mp = 196–197 °C;  $^1\text{H NMR}$  (600 MHz,  $\text{CDCl}_3$ ):  $\delta = 12.15$  (s, 1H, ArOH), 8.27–8.23 (m, 1H, ArH), 8.03–8.00 (m, 1H, ArH), 7.98 (s, 1H, C=CH), 7.35 (d,  $J = 8.9$  Hz, 2H, ArH), 6.96 (d,  $J = 8.9$  Hz, 2H, ArH), 6.81 (t,  $J = 7.3$  Hz, 1H, ArH), 6.76 (d,  $J = 10.2$  Hz, 1H, ArH), 6.69 (t,  $J = 8.5$  Hz, 1H, ArH), 6.65 (d,  $J = 9.6$  Hz, 1H, ArH), 6.43 (s, 1H, C–CH), 3.83 (s, 3H,  $\text{ArOCH}_3$ );  $^{13}\text{C NMR}$  (150 MHz,  $\text{CDCl}_3$ ):  $\delta = 191.7, 179.9, 167.9$  ( $J = 258.2$  Hz),  $167.9$  ( $J = 256.7$  Hz),  $166.5$  ( $J = 15.1$  Hz),  $159.3$  ( $J = 13.6$  Hz), 158.4, 139.9, 135.9, 135.7 ( $J = 11.7$  Hz), 129.9 ( $J = 11.4$  Hz), 129.2, 120.4, 120.4, 120.2 ( $J = 2.5$  Hz), 115.5 ( $J = 1.5$  Hz), 114.8, 114.8, 110.7 ( $J = 22.7$  Hz), 109.1, 107.5 ( $J = 22.6$  Hz), 105.4 ( $J = 24.5$  Hz), 105.1 ( $J = 23.6$  Hz), 64.7, 55.6; HRMS (TOF ES<sup>+</sup>):  $m/z$  calcd for  $\text{C}_{25}\text{H}_{17}\text{F}_2\text{N}_2\text{O}_5$  [(M+H)<sup>+</sup>], 463.1100, found, 463.1104.

**7-Bromo-4-(4-bromo-2-hydroxybenzoyl)-2-(4-methoxyphenyl)-2,4a-dihydro-10H-chromeno[2,3-d]pyridazin-10-one (3h)**

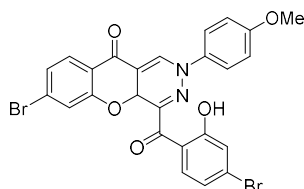

$V_{\text{Petroleum ether}}/V_{\text{Ethyl acetate}} = 10:1$ ,  $R_f = 0.25$ ; Yellow solid: 27 mg (47%); mp = 210–211°C;  $^1\text{H NMR}$  (600 MHz,  $\text{CDCl}_3$ ):  $\delta = 11.87$  (s, 1H, ArOH), 8.07 (d,  $J = 8.6$  Hz, 1H, ArH), 7.97 (s, 1H, C=CH), 7.83 (d,  $J = 8.3$  Hz, 1H, ArH), 7.34 (d,  $J = 8.6$  Hz, 2H, ArH), 7.28 (s, 1H, ArH), 7.23 (d,  $J = 8.4$  Hz, 1H, ArH), 7.16 (s, 1H, ArH), 7.11 (d,  $J = 8.4$  Hz, 1H, ArH), 6.96 (d,  $J = 8.6$  Hz, 2H, ArH), 6.40 (s, 1H, C–CH), 3.83 (s, 3H,  $\text{ArOCH}_3$ );  $^{13}\text{C NMR}$  (150 MHz,  $\text{CDCl}_3$ ):  $\delta = 192.3, 180.4, 164.2, 158.5,$

157.7, 139.9, 135.8, 134.0, 131.9, 131.1, 129.3, 128.6, 125.9, 122.7, 122.3, 121.7, 121.7, 120.4, 120.4, 117.3, 114.9, 114.9, 109.3, 64.5, 55.7; HRMS (TOF ES+):  $m/z$  calcd for  $C_{25}H_{17}Br_2N_2O_5$  [(M+H)<sup>+</sup>], 582.9499, found, 582.9493.

**4-(2-Hydroxy-4-(thiophen-2-yl)benzoyl)-2-(4-methoxyphenyl)-7-(thiophen-2-yl)-2,4a-dihydro-10H-chromeno[2,3-d]pyridazin-10-one (3i)**

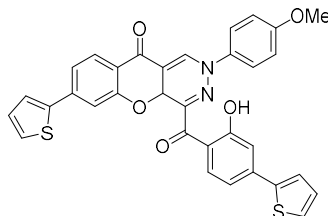

$V_{\text{Petroleum ether}}/V_{\text{Ethyl acetate}} = 7:1$ ,  $R_f = 0.25$ ; Yellow solid: 22 mg (37%); mp = 194–195°C; <sup>1</sup>H NMR (600 MHz, CDCl<sub>3</sub>):  $\delta = 12.03$  (s, 1H, ArOH), 8.23 (d,  $J = 9.7$  Hz, 1H, C=CH), 8.01 (s, 1H, C=CH), 8.00 (d,  $J = 8.5$  Hz, 1H, C=CH), 7.52 (d,  $J = 2.8$  Hz, 1H, C=CH), 7.43 (s, 2H, ArH), 7.39 (d,  $J = 8.9$  Hz, 2H, ArH), 7.37 (s, 1H, ArH), 7.34 (d,  $J = 8.2$  Hz, 2H, ArH), 7.24 (d,  $J = 6.7$  Hz, 1H, C=CH), 7.21 (s, 1H, ArH), 7.15 (t,  $J = 3.0$  Hz, 1H, C=CH), 7.11 (t,  $J = 4.5$  Hz, 1H, C=CH), 6.97 (d,  $J = 9.1$  Hz, 2H, ArH), 6.45 (s, 1H, C=CH), 3.84 (s, 3H, ArOCH<sub>3</sub>); <sup>13</sup>C NMR (150 MHz, CDCl<sub>3</sub>):  $\delta = 192.2$ , 180.5, 164.4, 158.3, 157.9, 142.5, 142.5, 142.5, 142.3, 140.3, 136.1, 133.9, 128.9, 128.5, 128.4, 128.1, 127.5, 127.1, 125.7, 125.3, 122.1, 120.3, 120.3, 119.8, 117.4, 116.6, 114.8, 114.8, 114.7, 114.5, 109.5, 64.4, 55.7; HRMS (TOF ES+):  $m/z$  calcd for  $C_{33}H_{23}N_2O_5S_2$  [(M+H)<sup>+</sup>], 591.1043, found, 591.1049.

**8-Chloro-4-(5-chloro-2-hydroxy-4-methylbenzoyl)-2-(4-methoxyphenyl)-7-methyl-2,4a-dihydro-10H-chromeno[2,3-d]pyridazin-10-one (3j)**

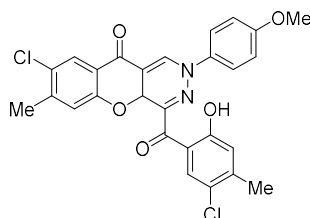

$V_{\text{Petroleum ether}}/V_{\text{Ethyl acetate}} = 10:1$ ,  $R_f = 0.25$ ; Yellow solid: 44 mg (84%); mp = 200–201°C; <sup>1</sup>H NMR (600 MHz, CDCl<sub>3</sub>):  $\delta = 11.69$  (s, 1H, ArOH), 8.28 (s, 1H, C=CH), 7.95 (d,  $J = 19.8$  Hz, 2H, ArH), 7.38 (d,  $J = 9.2$  Hz, 2H, ArH), 6.98–6.96 (m, 3H, ArH), 6.86 (s, 1H, ArH), 6.34 (s, 1H, C=CH), 3.84 (s, 3H, ArOCH<sub>3</sub>), 2.42 (s, 3H, ArCH<sub>3</sub>), 2.37 (s, 3H, ArCH<sub>3</sub>); <sup>13</sup>C NMR (150 MHz, CDCl<sub>3</sub>):  $\delta = 191.3$ , 179.9, 162.2, 158.5, 155.7, 146.4, 145.9, 139.9, 135.9, 132.7, 129.3, 128.5, 127.0, 124.4, 122.3, 120.5, 120.4, 120.4, 120.4, 117.1, 114.8, 114.8, 109.5, 64.1, 55.6, 20.9, 20.9; HRMS (TOF ES+):  $m/z$  calcd for  $C_{27}H_{21}Cl_2N_2O_5$  [(M+H)<sup>+</sup>], 523.0822, found, 523.0829.

**4-(2-Hydroxy-3,5-dimethylbenzoyl)-2-(4-methoxyphenyl)-6,8-dimethyl-2,4a-dihydro-10H-chromeno[2,3-d]pyridazin-10-one (3k)**

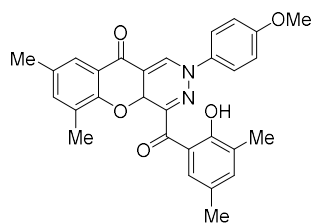

$V_{\text{Petroleum ether}}/V_{\text{Ethyl acetate}} = 10:1$ ,  $R_f = 0.25$ ; Yellow solid: 42 mg (87%); mp = 186–187°C;  $^1\text{H NMR}$  (600 MHz,  $\text{CDCl}_3$ ):  $\delta = 11.95$  (s, 1H, ArOH), 7.98 (s, 1H, C=CH), 7.87 (s, 1H, ArH), 7.62 (s, 1H, ArH), 7.37 (d,  $J = 9.0$  Hz, 2H, ArH), 7.27 (s, 1H, ArH), 7.19 (s, 1H, ArH), 6.96–6.92 (m, 2H, ArH), 6.29 (s, 1H, C–CH), 3.83 (s, 3H,  $\text{ArOCH}_3$ ), 2.32 (s, 3H,  $\text{ArCH}_3$ ), 2.30 (s, 6H,  $\text{ArCH}_3$ ), 2.07 (s, 3H,  $\text{ArCH}_3$ );  $^{13}\text{C NMR}$  (150 MHz,  $\text{CDCl}_3$ ):  $\delta = 179.0, 176.5, 156.3, 155.4, 154.3, 153.2, 138.0, 136.3, 136.1, 134.8, 131.2, 127.7, 127.4, 127.3, 124.4, 123.7, 123.0, 122.7, 122.5, 116.0, 116.0, 114.7, 114.7, 75.0, 55.6, 20.9, 20.6, 15.7, 15.5$ ; HRMS (TOF ES<sup>+</sup>):  $m/z$  calcd for  $\text{C}_{29}\text{H}_{27}\text{N}_2\text{O}_5$  [(M+H)<sup>+</sup>], 483.1914, found, 483.1911.

**11-(1-Hydroxy-2-naphthoyl)-9-(4-methoxyphenyl)-9,11a-dihydro-7H-benzo[7,8]chromeno[2,3-d]pyridazin-7-one (3l)**

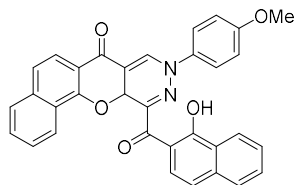

$V_{\text{Petroleum ether}}/V_{\text{Ethyl acetate}} = 10:1$ ,  $R_f = 0.25$ ; Yellow solid: 48 mg (91%); mp = 180–181°C;  $^1\text{H NMR}$  (600 MHz,  $\text{CDCl}_3$ ):  $\delta = 8.57$  (d,  $J = 8.3$  Hz, 1H, ArH), 8.26 (d,  $J = 8.9$  Hz, 1H, ArH), 8.18 (s, 1H, C=CH), 8.09 (d,  $J = 8.3$  Hz, 1H, ArH), 7.99 (d,  $J = 8.8$  Hz, 1H, ArH), 7.83–7.78 (m, 2H, ArH), 7.70 (t,  $J = 7.7$  Hz, 1H, ArH), 7.60 (s, 2H, ArH), 7.49 (d,  $J = 8.7$  Hz, 1H, ArH), 7.45 (t,  $J = 7.7$  Hz, 1H, ArH), 7.35 (d,  $J = 8.4$  Hz, 2H, ArH), 7.10 (s, 2H, ArH), 6.83 (d,  $J = 8.4$  Hz, 1H, ArH), 6.57 (s, 1H, C–CH), 3.84 (s, 3H,  $\text{ArOCH}_3$ );  $^{13}\text{C NMR}$  (150 MHz,  $\text{CDCl}_3$ ):  $\delta = 192.5, 180.8, 164.9, 160.7, 155.7, 143.6, 140.1, 137.8, 137.6, 130.8, 130.5, 129.9, 128.1, 127.8, 127.5, 126.7, 126.5, 126.1, 125.2, 124.9, 124.6, 123.8, 122.0, 121.9, 118.3, 117.9, 112.4, 112.1, 110.1, 109.6, 104.2, 65.1, 55.5$ ; HRMS (TOF ES<sup>+</sup>):  $m/z$  calcd for  $\text{C}_{33}\text{H}_{23}\text{N}_2\text{O}_5$  [(M+H)<sup>+</sup>], 527.1601, found, 527.1597.

**4-(2-Hydroxybenzoyl)-2-phenyl-2,4a-dihydro-10H-chromeno[2,3-d]pyridazin-10-one (3m)**

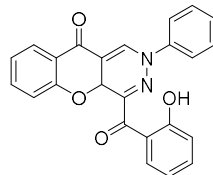

$V_{\text{Petroleum ether}}/V_{\text{Ethyl acetate}} = 10:1$ ,  $R_f = 0.25$ ; Yellow solid: 33 mg (82%); mp = 163–164°C;  $^1\text{H NMR}$  (500 MHz,  $\text{CDCl}_3$ ):  $\delta = 11.79$  (s, 1H, ArOH), 8.21 (d,  $J = 7.6$  Hz, 1H, ArH), 8.09 (s, 1H, C=CH), 8.00 (d,  $J = 7.3$  Hz, 1H, ArH), 7.60–7.56 (m, 1H, ArH), 7.53–7.50 (m, 1H, ArH), 7.47–7.43 (m, 4H, ArH), 7.28 (s, 1H, ArH), 7.11–7.07 (m, 2H, ArH), 7.01–6.97 (m, 1H, ArH), 6.94 (d,  $J = 8.1$  Hz, 1H, ArH), 6.39 (s, 1H, C–CH);  $^{13}\text{C NMR}$  (150 MHz,  $\text{CDCl}_3$ ):  $\delta = 193.3, 181.1, 163.9, 157.7, 142.4, 140.7, 137.2, 136.7, 133.3, 129.8, 129.8, 128.5, 127.4, 126.6, 123.4, 122.4, 119.1, 118.6, 118.5, 118.5, 118.3, 118.3, 109.9, 64.2$ ; HRMS (TOF ES<sup>+</sup>):  $m/z$  calcd for  $\text{C}_{24}\text{H}_{17}\text{N}_2\text{O}_4$  [(M+H)<sup>+</sup>], 397.1183, found, 397.1188.



**4-(2-Hydroxybenzoyl)-2-(*p*-tolyl)-2,4a-dihydro-10*H*-chromeno[2,3-*d*]pyridazin-10-one (3n)**

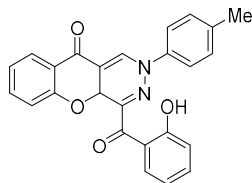

$V_{\text{Petroleum ether}}/V_{\text{Ethyl acetate}} = 10:1$ ,  $R_f = 0.25$ ; Yellow solid: 23 mg (56%); mp = 175–176°C;  $^1\text{H NMR}$  (600 MHz,  $\text{CDCl}_3$ ):  $\delta = 11.82$  (s, 1H, ArOH), 8.21 (d,  $J = 7.4$  Hz, 1H, ArH), 8.05 (s, 1H, C=CH), 8.00 (d,  $J = 7.1$  Hz, 1H, ArH), 7.58–7.55 (m, 1H, ArH), 7.53–7.50 (m, 1H, ArH), 7.34 (d,  $J = 7.3$  Hz, 2H, ArH), 7.23 (d,  $J = 7.3$  Hz, 2H, ArH), 7.10–7.07 (m, 2H, ArH), 6.97 (d,  $J = 7.0$  Hz, 1H, ArH), 6.94 (d,  $J = 8.1$  Hz, 1H, ArH), 6.40 (s, 1H, C–CH), 2.37 (s, 3H, ArCH<sub>3</sub>);  $^{13}\text{C NMR}$  (150 MHz,  $\text{CDCl}_3$ ):  $\delta = 193.2, 181.2, 163.8, 157.6, 140.4, 140.2, 137.1, 136.6, 136.6, 133.3, 130.2, 130.2, 128.6, 127.4, 123.4, 122.3, 118.9, 118.5, 118.5, 118.4, 118.4, 118.4, 109.7, 64.2, 20.9$ ; HRMS (TOF ES<sup>+</sup>):  $m/z$  calcd for  $\text{C}_{25}\text{H}_{19}\text{N}_2\text{O}_4$  [(M+H)<sup>+</sup>], 411.1339, found, 411.1332.

**2-(3,5-Dimethylphenyl)-4-(2-hydroxybenzoyl)-2,4a-dihydro-10*H*-chromeno[2,3-*d*]pyridazin-10-one (3o)**

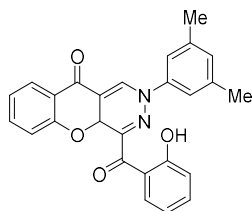

$V_{\text{Petroleum ether}}/V_{\text{Ethyl acetate}} = 10:1$ ,  $R_f = 0.25$ ; Yellow solid: 30 mg (70%); mp = 166–167°C;  $^1\text{H NMR}$  (600 MHz,  $\text{CDCl}_3$ ):  $\delta = 11.83$  (s, 1H, ArOH), 8.23 (d,  $J = 7.8$  Hz, 1H, ArH), 8.05 (s, 1H, C=CH), 8.00 (d,  $J = 7.5$  Hz, 1H, ArH), 7.57 (t,  $J = 7.5$  Hz, 1H, ArH), 7.51 (t,  $J = 7.3$  Hz, 1H, ArH), 7.23 (s, 1H, ArH), 7.18 (s, 2H, ArH), 7.10 (t,  $J = 7.7$  Hz, 2H, ArH), 6.98 (t,  $J = 7.6$  Hz, 1H, ArH), 6.94 (d,  $J = 8.3$  Hz, 1H, ArH), 6.40 (s, 1H, C–CH), 2.30 (s, 3H, ArCH<sub>3</sub>), 2.27 (s, 3H, ArCH<sub>3</sub>);  $^{13}\text{C NMR}$  (150 MHz,  $\text{CDCl}_3$ ):  $\delta = 193.3, 181.2, 163.8, 157.6, 140.4, 140.3, 138.2, 137.1, 136.6, 135.3, 133.4, 130.6, 128.8, 127.3, 123.39, 122.3, 119.6, 118.9, 118.5, 118.5, 118.4, 115.9, 109.6, 64.3, 20.1, 19.3$ ; HRMS (TOF ES<sup>+</sup>):  $m/z$  calcd for  $\text{C}_{26}\text{H}_{21}\text{N}_2\text{O}_4$  [(M+H)<sup>+</sup>], 425.1496, found, 425.1496.

**2-(3,5-Dimethoxyphenyl)-4-(2-hydroxybenzoyl)-2,4a-dihydro-10*H*-chromeno[2,3-*d*]pyridazin-10-one (3p)**

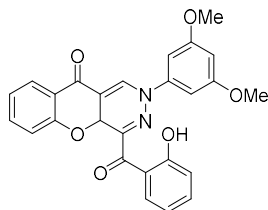

$V_{\text{Petroleum ether}}/V_{\text{Ethyl acetate}} = 10:1$ ,  $R_f = 0.25$ ; Yellow solid: 33 mg (72%); mp = 130–131°C;  $^1\text{H NMR}$  (600 MHz,  $\text{CDCl}_3$ ):  $\delta = 11.84$  (s, 1H, ArOH), 8.27 (d,  $J = 9.0$  Hz, 1H, ArH), 7.99 (d,  $J = 7.7$  Hz, 1H, ArH), 7.85 (s, 1H, C=CH), 7.56–7.49 (m, 2H, ArH), 7.10–7.05 (m, 2H, ArH), 6.97–6.92 (m, 4H, ArH), 6.89–6.86 (m, 1H, ArH), 6.41 (s, 1H, C–CH), 3.88 (s, 3H, ArOCH<sub>3</sub>), 3.77 (s, 3H, ArOCH<sub>3</sub>);  $^{13}\text{C NMR}$  (150 MHz,  $\text{CDCl}_3$ ):  $\delta = 193.4, 181.3, 163.8, 157.7, 153.7, 146.5, 140.4, 137.0$ ,

136.5, 133.5, 132.8, 132.0, 127.4, 123.6, 122.2, 118.8, 118.6, 118.5, 118.4, 114.3, 113.2, 111.0, 108.1, 63.9, 56.4, 55.9; HRMS (TOF ES<sup>+</sup>): *m/z* calcd for C<sub>26</sub>H<sub>21</sub>N<sub>2</sub>O<sub>6</sub> [(M+H)<sup>+</sup>], 457.1394, found, 457.1398.

**2-(2-(Benzyloxy)phenyl)-4-(2-hydroxybenzoyl)-2,4a-dihydro-10H-chromeno[2,3-d]pyridazin-10-one (3q)**

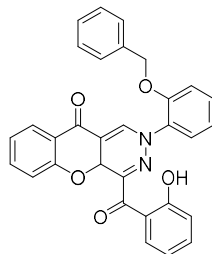

V<sub>Petroleum ether</sub>/V<sub>Ethyl acetate</sub> = 8:1, R<sub>f</sub> = 0.25; Yellow solid: 18 mg (35%); mp = 200–201°C; <sup>1</sup>H NMR (600 MHz, CDCl<sub>3</sub>): δ = 8.30 (d, *J* = 7.5 Hz, 1H, ArH), 8.09 (s, 1H, C=CH), 8.03 (d, *J* = 7.3 Hz, 1H, ArH), 7.70 (t, *J* = 7.4 Hz, 1H, ArH), 7.57 (d, *J* = 7.4 Hz, 2H, ArH), 7.49 (d, *J* = 8.4 Hz, 2H, ArH), 7.45–7.42 (m, 3H, ArH), 7.37–7.32 (m, 2H, ArH), 7.11 (t, *J* = 7.5 Hz, 1H, ArH), 7.00 (d, *J* = 8.2 Hz, 1H, ArH), 6.90 (d, *J* = 6.9 Hz, 2H, ArH), 6.84–6.80 (m, 1H, ArH), 6.57 (s, 1H, C–CH), 5.25 (s, 2H, CH<sub>2</sub>); <sup>13</sup>C NMR (150 MHz, CDCl<sub>3</sub>): δ = 178.3, 176.1, 159.1, 156.3, 154.9, 146.0, 136.7, 135.8, 133.9, 132.3, 128.8, 128.7, 128.7, 127.9, 127.6, 126.9, 126.9, 126.2, 125.5, 124.1, 123.5, 123.2, 122.9, 122.4, 121.7, 118.3, 118.3, 113.9, 112.4, 75.5, 70.4; HRMS (TOF ES<sup>+</sup>): *m/z* calcd for C<sub>31</sub>H<sub>23</sub>N<sub>2</sub>O<sub>5</sub> [(M+H)<sup>+</sup>], 503.1601, found, 503.1604.

**2-(2-Fluorophenyl)-4-(2-hydroxybenzoyl)-2,4a-dihydro-10H-chromeno[2,3-d]pyridazin-10-one (3r)**

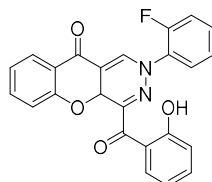

V<sub>Petroleum ether</sub>/V<sub>Ethyl acetate</sub> = 10:1, R<sub>f</sub> = 0.25; Yellow solid: 16 mg (39%); mp = 202–203°C; <sup>1</sup>H NMR (600 MHz, CDCl<sub>3</sub>): δ = 11.78 (s, 1H, ArOH), 8.21 (d, *J* = 7.8 Hz, 1H, ArH), 7.99 (d, *J* = 7.5 Hz, 1H, ArH), 7.84 (s, 1H, C=CH), 7.57–7.54 (m, 1H, ArH), 7.51 (t, *J* = 7.5 Hz, 1H, ArH), 7.44 (t, *J* = 7.6 Hz, 1H, ArH), 7.35–7.32 (m, 1H, ArH), 7.25–7.21 (m, 2H, ArH), 7.12–7.05 (m, 2H, ArH), 6.99–6.93 (m, 2H, ArH), 6.40 (s, 1H, C–CH); <sup>13</sup>C NMR (150 MHz, CDCl<sub>3</sub>): δ = 193.3, 181.0, 163.9, 157.8, 155.1 (*J* = 251.3 Hz), 141.2, 137.4, 136.7, 133.4, 131.6 (*J* = 5.0 Hz), 130.9 (*J* = 9.8 Hz), 129.4 (*J* = 7.7 Hz), 127.5, 125.2 (*J* = 3.8 Hz), 125.0, 123.5, 122.5, 119.2, 118.8, 118.6, 118.5, 117.4 (*J* = 19.9 Hz), 109.2, 63.9; HRMS (TOF ES<sup>+</sup>): *m/z* calcd for C<sub>24</sub>H<sub>16</sub>FN<sub>2</sub>O<sub>4</sub> [(M+H)<sup>+</sup>], 415.1089, found, 415.1090.

**2-(3-Chlorophenyl)-4-(2-hydroxybenzoyl)-2,4a-dihydro-10H-chromeno[2,3-d]pyridazin-10-one (3s)**

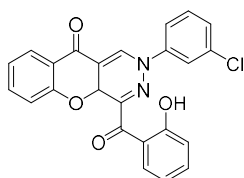

$V_{\text{Petroleum ether}}/V_{\text{Ethyl acetate}} = 10:1$ ,  $R_f = 0.25$ ; Yellow solid: 35 mg (81%); mp = 215–216°C;  $^1\text{H NMR}$  (600 MHz,  $\text{CDCl}_3$ ):  $\delta = 8.30$  (d,  $J = 7.6$  Hz, 1H, ArH), 8.13 (s, 1H, C=CH), 8.00 (d,  $J = 7.5$  Hz, 1H, ArH), 7.72 (t,  $J = 7.3$  Hz, 1H, ArH), 7.52 (t,  $J = 8.0$  Hz, 2H, ArH), 7.46 (t,  $J = 7.6$  Hz, 1H, ArH), 7.16–7.11 (m, 3H, ArH), 7.03 (d,  $J = 8.2$  Hz, 1H, ArH), 6.93 (d,  $J = 7.0$  Hz, 2H, ArH), 6.48 (s, 1H, C–CH);  $^{13}\text{C NMR}$  (150 MHz,  $\text{CDCl}_3$ ):  $\delta = 179.2, 176.1, 159.5, 156.3, 154.6, 143.7, 136.4, 135.3, 134.1, 130.3, 129.3, 127.5, 126.2, 125.6, 124.0, 123.4, 122.8, 122.7, 122.6, 118.3, 118.3, 114.7, 112.9, 75.8$ ; HRMS (TOF ES<sup>+</sup>): m/z calcd for  $\text{C}_{24}\text{H}_{16}\text{ClN}_2\text{O}_4$  [(M+H)<sup>+</sup>], 431.0793, found, 431.0787.

**2-(4-Chlorophenyl)-4-(2-hydroxybenzoyl)-2,4a-dihydro-10H-chromeno[2,3-d]pyridazin-10-one (3t)**

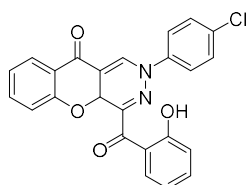

$V_{\text{Petroleum ether}}/V_{\text{Ethyl acetate}} = 10:1$ ,  $R_f = 0.25$ ; Yellow solid: 34 mg (78%); mp = 194–195°C;  $^1\text{H NMR}$  (600 MHz,  $\text{CDCl}_3$ ):  $\delta = 11.75$  (s, 1H, ArOH), 8.15 (d,  $J = 7.6$  Hz, 1H, ArH), 8.05 (s, 1H, C=CH), 7.99 (d,  $J = 7.1$  Hz, 1H, ArH), 7.61–7.58 (m, 1H, ArH), 7.53–7.50 (m, 1H, ArH), 7.40 (s, 4H, ArH), 7.13–7.09 (m, 2H, ArH), 7.00–6.97 (m, 1H, ArH), 6.94 (d,  $J = 8.2$  Hz, 1H, ArH), 6.37 (s, 1H, C–CH);  $^{13}\text{C NMR}$  (150 MHz,  $\text{CDCl}_3$ ):  $\delta = 179.0, 175.9, 159.4, 156.3, 154.7, 141.1, 136.3, 134.0, 129.4, 129.4, 128.9, 128.5, 127.5, 126.1, 125.6, 123.9, 122.8, 122.7, 122.5, 118.3, 118.3, 115.8, 115.8, 75.6$ ; HRMS (TOF ES<sup>+</sup>): m/z calcd for  $\text{C}_{24}\text{H}_{16}\text{ClN}_2\text{O}_4$  [(M+H)<sup>+</sup>], 431.0793, found, 431.0793.

**2-(3-Bromophenyl)-4-(2-hydroxybenzoyl)-2,4a-dihydro-10H-chromeno[2,3-d]pyridazin-10-one (3u)**

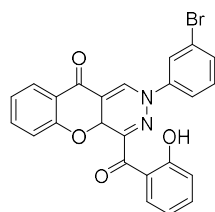

$V_{\text{Petroleum ether}}/V_{\text{Ethyl acetate}} = 10:1$ ,  $R_f = 0.25$ ; Yellow solid: 42 mg (88%); mp = 174–175°C;  $^1\text{H NMR}$  (600 MHz,  $\text{CDCl}_3$ ):  $\delta = 11.74$  (s, 1H, ArOH), 8.15 (s, 1H, ArH), 8.05 (s, 1H, C=CH), 8.00 (s, 1H, ArH), 7.62 (d,  $J = 24.8$  Hz, 2H, ArH), 7.52 (s, 1H, ArH), 7.40 (s, 2H, ArH), 7.30 (s, 1H, ArH), 7.11 (s, 2H, ArH), 7.02–6.94 (m, 2H, ArH), 6.36 (s, 1H, C–CH);  $^{13}\text{C NMR}$  (150 MHz,  $\text{CDCl}_3$ ):  $\delta = 193.0, 180.9, 163.9, 157.7, 143.3, 141.1, 137.4, 136.7, 133.1, 130.9, 129.4, 127.8, 127.4, 123.4, 123.2, 122.5, 121.3, 119.1, 118.5, 118.5, 118.4, 116.5, 110.2, 64.1$ ; HRMS (TOF ES<sup>+</sup>): m/z calcd for  $\text{C}_{24}\text{H}_{16}\text{BrN}_2\text{O}_4$  [(M+H)<sup>+</sup>], 475.0288, found, 475.0294.

**3-(4-(2-Hydroxybenzoyl)-10-oxo-10H-chromeno[2,3-d]pyridazin-2(4aH)-yl)benzonitrile (3v)**

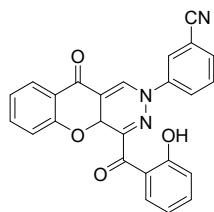

$V_{\text{Petroleum ether}}/V_{\text{Ethyl acetate}} = 5:1$ ,  $R_f = 0.25$ ; Yellow solid: 37 mg (89%); mp = 186–187°C;  $^1\text{H NMR}$  (600 MHz,  $\text{CDCl}_3$ ):  $\delta = 13.76$  (s, 1H, ArOH), 8.29 (d,  $J = 7.7$  Hz, 1H, ArH), 8.16 (s, 1H, C=CH), 8.00 (d,  $J = 7.5$  Hz, 1H, ArH), 7.73 (t,  $J = 7.4$  Hz, 1H, ArH), 7.53 (t,  $J = 8.1$  Hz, 2H, ArH), 7.48 (t,  $J = 7.4$  Hz, 1H, ArH), 7.34 (s, 1H, ArH), 7.31–7.28 (m, 1H, ArH), 7.24–7.20 (m, 2H, ArH), 7.14 (t,  $J = 7.3$  Hz, 1H, ArH), 7.03 (d,  $J = 8.1$  Hz, 1H, ArH), 6.43 (s, 1H, C–CH);  $^{13}\text{C NMR}$  (150 MHz,  $\text{CDCl}_3$ ):  $\delta = 178.4, 174.9, 158.7, 155.3, 153.6, 142.3, 135.6, 133.2, 129.4, 129.1, 126.6, 125.5, 124.9, 124.8, 122.9, 121.6, 121.5, 121.5, 117.7, 117.4, 117.3, 117.2, 116.4, 112.3, 74.9$ ; HRMS (TOF ES<sup>+</sup>):  $m/z$  calcd for  $\text{C}_{25}\text{H}_{16}\text{N}_3\text{O}_4$  [(M+H)<sup>+</sup>], 422.1135, found, 422.1129.

**2-(2-(4-Fluorobenzoyl)phenyl)-4-(2-hydroxybenzoyl)-2,4a-dihydro-10H-chromeno[2,3-d]pyridazin-10-one (3w)**

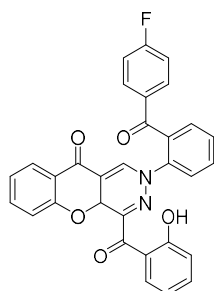

$V_{\text{Petroleum ether}}/V_{\text{Ethyl acetate}} = 7:1$ ,  $R_f = 0.25$ ; Yellow solid: 21 mg (40%); mp = 203–204°C;  $^1\text{H NMR}$  (600 MHz,  $\text{CDCl}_3$ ):  $\delta = 8.30$  (d,  $J = 7.6$  Hz, 1H, ArH), 8.13 (d,  $J = 7.8$  Hz, 1H, ArH), 8.11 (s, 1H, C=CH), 7.80–7.77 (m, 2H, ArH), 7.71 (d,  $J = 7.3$  Hz, 1H, ArH), 7.65 (d,  $J = 8.3$  Hz, 1H, ArH), 7.52–7.44 (m, 4H, ArH), 7.37 (t,  $J = 7.5$  Hz, 1H, ArH), 7.16–7.09 (m, 3H, ArH), 7.01 (d,  $J = 8.2$  Hz, 1H, ArH), 6.96 (t,  $J = 7.3$  Hz, 1H, ArH), 6.56 (s, 1H, C–CH);  $^{13}\text{C NMR}$  (150 MHz,  $\text{CDCl}_3$ ):  $\delta = 196.3, 178.2, 176.0, 165.2$  ( $J = 253.8$  Hz), 159.5, 156.3, 154.8, 144.8, 136.3, 135.0 ( $J = 3.0$  Hz), 134.1 ( $J = 14.6$  Hz), 133.1, 132.63 ( $J = 9.1$  Hz), 131.2, 128.2, 126.2, 125.6, 124.0, 122.9 ( $J = 26.9$  Hz), 122.6, 121.2, 121.1, 118.3, 118.3, 115.3 ( $J = 21.8$  Hz), 115.3, 75.8; HRMS (TOF ES<sup>+</sup>):  $m/z$  calcd for  $\text{C}_{31}\text{H}_{20}\text{FN}_2\text{O}_5$  [(M+H)<sup>+</sup>], 519.1351, found, 519.1353.

**(1S,4S)-N-(4-(4-(2-Hydroxybenzoyl)-10-oxo-10H-chromeno[2,3-d]pyridazin-2(4aH)-yl)phenyl)-4,7,7-trimethyl-3-oxo-2-oxabicyclo[2.2.1]heptane-1-carboxamide (3x)**

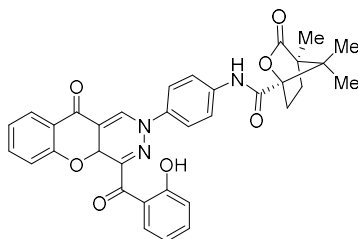

$V_{\text{Petroleum ether}}/V_{\text{Ethyl acetate}} = 5:1$ ,  $R_f = 0.25$ ; Yellow solid: 20 mg (33%); mp = 196–198 °C;  $^1\text{H NMR}$  (600 MHz,  $\text{CDCl}_3$ ):  $\delta = 13.97$  (s, 1H, ArOH), 8.28 (d,  $J = 7.9$  Hz, 1H, ArH), 8.12 (s, 1H, NH), 8.04 (s, 1H, C=CH), 7.99 (d,  $J = 7.8$  Hz, 1H, ArH), 7.72 (s, 1H, ArH), 7.53–7.42 (m, 4H, ArH), 7.16–6.99 (m, 5H, ArH), 6.50 (s, 1H, C–CH), 2.58 (d,  $J = 8.9$  Hz, 1H, CCH<sub>2</sub>), 1.98 (t,  $J = 11.6$  Hz, 2H, CCH<sub>2</sub>), 1.74 (d,  $J = 11.3$  Hz, 1H, CCH<sub>2</sub>), 1.14 (s, 6H, CCH<sub>3</sub>), 0.95 (s, 3H, CCH<sub>3</sub>);  $^{13}\text{C NMR}$  (150 MHz,  $\text{CDCl}_3$ ):  $\delta = 178.8, 177.9, 175.9, 164.9, 159.3, 156.3, 154.7, 139.4, 136.1, 133.9, 132.6, 128.4, 127.4, 126.1, 125.5, 123.9, 122.9, 122.7, 122.5, 121.0, 121.0, 118.2, 118.2, 115.2, 115.2, 92.4, 75.5, 55.4, 54.4, 30.4, 29.0, 16.7, 16.6, 9.7$ ; HRMS (TOF ES<sup>+</sup>):  $m/z$  calcd for  $\text{C}_{34}\text{H}_{30}\text{N}_3\text{O}_7$  [(M+H)<sup>+</sup>], 592.2078, found, 592.2077.

#### 4.2 Spectroscopic data of 3-Pyridazinyl-chromones.

**(1-(4-Methoxyphenyl)-4-(4-oxo-4*H*-chromen-3-yl)-1,4-dihydropyridazine-3,5-diyl)bis((2-hydroxyphenyl)methanone) (4a)**

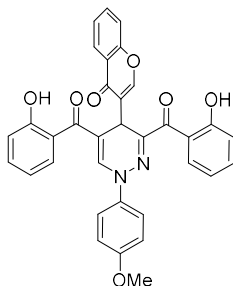

$V_{\text{Petroleum ether}}/V_{\text{Ethyl acetate}} = 8:1$ ,  $R_f = 0.25$ ; Yellow solid: 232 mg (81%); mp = 246–247 °C;  $^1\text{H NMR}$  (600 MHz,  $\text{CDCl}_3$ ):  $\delta = 11.74$  (s, 1H, ArOH), 10.94 (s, 1H, ArOH), 8.23–8.21 (m, 1H, ArH), 8.12 (d,  $J = 3.3$  Hz, 2H, ArH), 7.65 (s, 1H, C=CH), 7.61 (t,  $J = 6.5$  Hz, 2H, ArH), 7.42 (d,  $J = 10.0$  Hz, 4H, ArH), 7.40 (s, 1H, C=CH), 7.33 (t,  $J = 7.5$  Hz, 1H, ArH), 7.00 (d,  $J = 8.2$  Hz, 1H, ArH), 6.97–6.94 (m, 3H, ArH), 6.89 (t,  $J = 7.5$  Hz, 1H, ArH), 6.84 (t,  $J = 7.6$  Hz, 1H, ArH), 5.69 (s, 1H, C–CH), 3.83 (s, 3H, ArOCH<sub>3</sub>);  $^{13}\text{C NMR}$  (150 MHz,  $\text{CDCl}_3$ ):  $\delta = 196.5, 194.8, 177.4, 163.3, 161.1, 158.1, 156.3, 155.4, 143.6, 137.6, 137.2, 136.5, 135.0, 134.1, 133.8, 130.8, 125.6, 125.4, 124.7, 121.3, 120.6, 120.6, 120.2, 119.0, 119.0, 118.9, 118.5, 118.4, 118.1, 114.8, 114.8, 110.4, 55.8, 30.6$ ; HRMS (TOF ES<sup>+</sup>):  $m/z$  calcd for  $\text{C}_{34}\text{H}_{24}\text{N}_2\text{NaO}_7$  [(M+Na)<sup>+</sup>], 595.1476, found, 595.1472.

**(1-(4-Methoxyphenyl)-4-(6-methyl-4-oxo-4*H*-chromen-3-yl)-1,4-dihydropyridazine-3,5-diyl)bis((2-hydroxy-5-methylphenyl)methanone) (4b)**

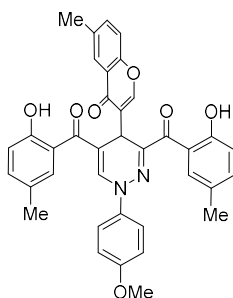

$V_{\text{Petroleum ether}}/V_{\text{Ethyl acetate}} = 8:1$ ,  $R_f = 0.25$ ; Yellow solid: 243 mg (79%); mp = 231–232 °C;  $^1\text{H}$  NMR (600 MHz,  $\text{CDCl}_3$ ):  $\delta = 11.59$  (s, 1H, ArOH), 10.71 (s, 1H, ArOH), 8.10 (s, 2H, ArH), 7.93 (s, 1H, C=CH), 7.66 (s, 1H, C=CH), 7.43–7.39 (m, 3H, ArH), 7.38 (s, 1H, ArH), 7.31 (d,  $J = 8.5$  Hz, 1H, ArH), 7.26–7.21 (m, 2H, ArH), 6.95 (d,  $J = 8.9$  Hz, 2H, ArH), 6.91 (d,  $J = 8.4$  Hz, 1H, ArH), 6.87 (d,  $J = 8.4$  Hz, 1H, ArH), 5.67 (s, 1H, C–CH), 3.83 (s, 3H,  $\text{ArOCH}_3$ ), 2.39 (s, 3H,  $\text{ArCH}_3$ ), 2.29 (s, 3H,  $\text{ArCH}_3$ ), 2.25 (s, 3H,  $\text{ArCH}_3$ );  $^{13}\text{C}$  NMR (150 MHz,  $\text{CDCl}_3$ ):  $\delta = 196.5$ , 194.3, 177.5, 161.2, 158.8, 157.9, 155.4, 154.6, 143.8, 137.5, 137.2, 137.1, 135.9, 135.3, 135.0, 133.7, 130.6, 128.2, 127.9, 124.9, 124.4, 121.2, 120.2, 120.2, 119.9, 118.7, 118.2, 118.1, 117.8, 114.8, 114.8, 110.7, 55.8, 30.6, 21.0, 20.8, 20.7; HRMS (TOF ES<sup>+</sup>):  $m/z$  calcd for  $\text{C}_{37}\text{H}_{30}\text{N}_2\text{NaO}_7$  [(M+Na)<sup>+</sup>], 637.1945, found, 637.1944.

**(4-(6-Fluoro-4-oxo-4H-chromen-3-yl)-1-(4-methoxyphenyl)-1,4-dihydropyridazine-3,5-diyl)bis((5-fluoro-2-hydroxyphenyl)methanone) (4c)**

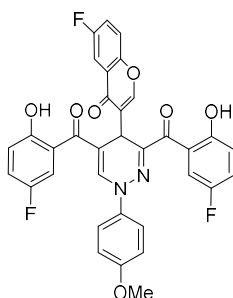

$V_{\text{Petroleum ether}}/V_{\text{Ethyl acetate}} = 8:1$ ,  $R_f = 0.25$ ; Yellow solid: 229 mg (73%); mp = 229–230 °C;  $^1\text{H}$  NMR (600 MHz,  $\text{CDCl}_3$ ):  $\delta = 11.54$  (s, 1H, ArOH), 10.52 (s, 1H, ArOH), 8.15 (s, 1H, C=CH), 8.08–8.04 (m, 1H, ArH), 7.80–7.77 (m, 1H, ArH), 7.64 (s, 1H, C=CH), 7.44–7.42 (m, 3H, ArH), 7.38–7.33 (m, 1H, ArH), 7.27 (d,  $J = 5.2$  Hz, 1H, ArH), 7.21–7.14 (m, 2H, ArH), 7.00 (d,  $J = 9.1$  Hz, 2H, ArH), 6.99–6.95 (m, 1H, ArH), 6.95–6.91 (m, 1H, ArH), 5.65 (s, 1H, C–CH), 3.85 (s, 3H,  $\text{ArOCH}_3$ );  $^{13}\text{C}$  NMR (150 MHz,  $\text{CDCl}_3$ ):  $\delta = 194.9$ , 192.8, 176.4, 159.4 ( $J = 247.6$  Hz), 159.4, 158.3, 156.8, 155.5, 154.8 ( $J = 240.1$  Hz), 154.5 ( $J = 237.1$  Hz), 152.3, 143.1, 137.7, 136.7, 125.6 ( $J = 7.2$  Hz), 123.9 ( $J = 23.8$  Hz), 122.1 ( $J = 22.7$  Hz), 122.0 ( $J = 25.7$  Hz), 120.8, 120.8, 120.5, 120.3 ( $J = 8.1$  Hz), 119.6 ( $J = 6.2$  Hz), 119.6 ( $J = 7.4$  Hz), 119.1 ( $J = 7.3$  Hz), 118.5 ( $J = 25.0$  Hz), 118.1 ( $J = 7.6$  Hz), 115.8 ( $J = 23.8$  Hz), 114.8, 114.8, 110.5 ( $J = 23.8$  Hz), 109.9, 55.6, 29.9; HRMS (TOF ES<sup>+</sup>):  $m/z$  calcd for  $\text{C}_{34}\text{H}_{21}\text{F}_3\text{N}_2\text{NaO}_7$  [(M+Na)<sup>+</sup>], 649.1193, found, 649.1194.

**(4-(6-Chloro-4-oxo-4H-chromen-3-yl)-1-(4-methoxyphenyl)-1,4-dihydropyridazine-3,5-diyl)bis((5-chloro-2-hydroxyphenyl)methanone) (4d)**

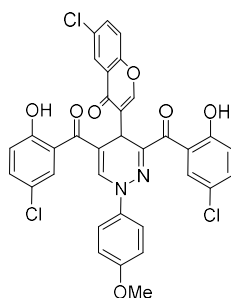

$V_{\text{Petroleum ether}}/V_{\text{Ethyl acetate}} = 8:1$ ,  $R_f = 0.25$ ; Red solid: 229 mg (68%); mp = 175–176 °C;  $^1\text{H NMR}$  (600 MHz,  $\text{CDCl}_3$ ):  $\delta = 11.65$  (s, 1H, ArOH), 10.70 (s, 1H, ArOH), 8.42 (d,  $J = 2.7$  Hz, 1H, ArH), 8.15 (s, 1H, C=CH), 8.13 (d,  $J = 2.6$  Hz, 1H, ArH), 7.65 (s, 1H, C=CH), 7.58–7.55 (m, 1H, ArH), 7.53 (d,  $J = 2.6$  Hz, 1H, ArH), 7.44 (d,  $J = 8.7$  Hz, 2H, ArH), 7.40–7.36 (m, 3H, ArH), 7.01 (d,  $J = 8.7$  Hz, 2H, ArH), 6.96 (d,  $J = 8.8$  Hz, 1H, ArH), 6.92 (d,  $J = 8.9$  Hz, 1H, ArH), 5.63 (s, 1H, C–CH), 3.85 (s, 3H,  $\text{ArOCH}_3$ );  $^{13}\text{C NMR}$  (150 MHz,  $\text{CDCl}_3$ ):  $\delta = 194.9$ , 192.5, 176.2, 161.8, 159.4, 158.5, 155.7, 154.6, 143.1, 137.8, 136.7, 136.3, 134.9, 134.2, 133.0, 131.5, 129.7, 125.6, 125.3, 123.9, 123.7, 121.5, 120.8, 120.8, 120.8, 120.1, 120.1, 119.8, 119.3, 115.1, 115.1, 110.3, 55.8, 30.1; HRMS (TOF ES<sup>+</sup>):  $m/z$  calcd for  $\text{C}_{34}\text{H}_{21}\text{Cl}_3\text{N}_2\text{NaO}_7$  [(M+Na)<sup>+</sup>], 697.0307, found, 697.0303.

**(4-(6-Bromo-4-oxo-4H-chromen-3-yl)-1-(4-methoxyphenyl)-1,4-dihydropyridazine-3,5-diyl)bis((5-bromo-2-hydroxyphenyl)methanone) (4e)**

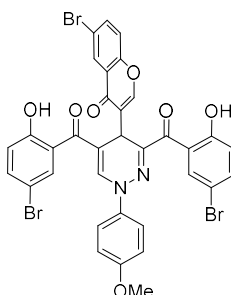

$V_{\text{Petroleum ether}}/V_{\text{Ethyl acetate}} = 8:1$ ,  $R_f = 0.25$ ; Red solid: 262 mg (65%); mp = 209–210 °C;  $^1\text{H NMR}$  (600 MHz,  $\text{CDCl}_3$ ):  $\delta = 11.66$  (s, 1H, ArOH), 10.71 (s, 1H, ArOH), 8.61 (d,  $J = 2.3$  Hz, 1H, ArH), 8.30 (d,  $J = 2.3$  Hz, 1H, ArH), 8.16 (s, 1H, C=CH), 7.72–7.68 (m, 1H, ArH), 7.67 (s, 1H, ArH), 7.66 (s, 1H, C=CH), 7.54–7.48 (m, 2H, ArH), 7.45 (d,  $J = 8.9$  Hz, 2H, ArH), 7.33 (d,  $J = 8.9$  Hz, 1H, ArH), 7.02 (d,  $J = 9.0$  Hz, 2H, ArH), 6.91 (d,  $J = 8.8$  Hz, 1H, ArH), 6.87 (d,  $J = 8.8$  Hz, 1H, ArH), 5.61 (s, 1H, C–CH), 3.86 (s, 3H,  $\text{ArOCH}_3$ );  $^{13}\text{C NMR}$  (150 MHz,  $\text{CDCl}_3$ ):  $\delta = 194.8$ , 192.2, 176.1, 162.2, 159.9, 158.5, 155.7, 155.0, 143.0, 138.9, 137.8, 137.7, 136.9, 136.7, 136.1, 132.7, 128.5, 125.9, 121.6, 121.4, 120.6, 120.6, 120.6, 120.3, 120.2, 119.9, 118.9, 115.1, 115.1, 110.8, 110.6, 110.4, 55.8, 30.1; HRMS (TOF ES<sup>+</sup>):  $m/z$  calcd for  $\text{C}_{34}\text{H}_{22}\text{Br}_3\text{N}_2\text{O}_7$  [(M+H)<sup>+</sup>], 806.8972, found, 806.8972.

**(4-(7-Bromo-4-oxo-4H-chromen-3-yl)-1-(4-methoxyphenyl)-1,4-dihydropyridazine-3,5-diyl)bis((4-bromo-2-hydroxyphenyl)methanone) (4f)**

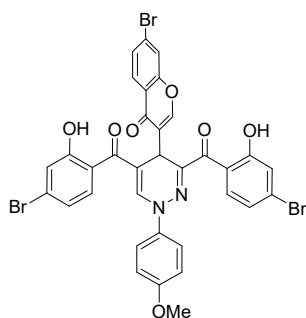

$V_{\text{Petroleum ether}}/V_{\text{Ethyl acetate}} = 8:1$ ,  $R_f = 0.25$ ; Yellow solid: 266 mg (66%); mp = 254–255 °C;  $^1\text{H}$  NMR (600 MHz,  $\text{CDCl}_3$ ):  $\delta = 11.80$  (s, 1H, ArOH), 11.03 (s, 1H, ArOH), 8.09 (s, 1H, ArH), 8.07 (s, 1H, C=CH), 7.96 (d,  $J = 8.6$  Hz, 1H, ArH), 7.61 (s, 1H, C=CH), 7.58 (s, 1H, ArH), 7.48–7.44 (m, 1H, ArH), 7.42 (d,  $J = 8.4$  Hz, 1H, ArH), 7.38 (d,  $J = 8.8$  Hz, 2H, ArH), 7.20–7.15 (m, 2H, ArH), 7.04–7.00 (m, 1H, ArH), 6.99–6.95 (m, 3H, ArH), 5.61 (s, 1H, C–CH), 3.84 (s, 3H,  $\text{ArOCH}_3$ );  $^{13}\text{C}$  NMR (150 MHz,  $\text{CDCl}_3$ ):  $\delta = 195.6, 193.8, 176.8, 163.7, 161.7, 158.4, 156.3, 155.5, 143.3, 137.6, 136.9, 134.9, 131.6, 131.3, 129.5, 129.2, 128.3, 127.0, 123.5, 122.6, 122.5, 121.8, 121.5, 121.5, 121.4, 120.7, 120.7, 118.9, 117.8, 114.9, 114.9, 110.1, 55.8, 30.4$ ; HRMS (TOF ES<sup>+</sup>):  $m/z$  calcd for  $\text{C}_{34}\text{H}_{21}\text{Br}_3\text{N}_2\text{NaO}_7$  [(M+Na)<sup>+</sup>], 828.8791, found, 828.8800.

**6-Chloro-3-(3-(5-chloro-2-hydroxy-3-methylbenzoyl)-5-(5-chloro-2-hydroxy-4-methylbenzoyl)-1-(4-methoxyphenyl)-1,4-dihydropyridazin-4-yl)-7-methyl-4H-chromen-4-one (4g)**

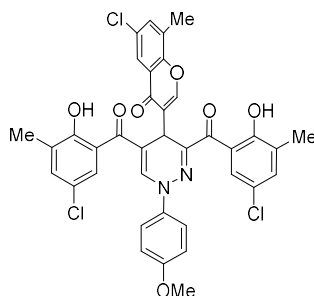

$V_{\text{Petroleum ether}}/V_{\text{Ethyl acetate}} = 8:1$ ,  $R_f = 0.25$ ; Yellow solid: 279 mg (78%); mp = 198–199 °C;  $^1\text{H}$  NMR (600 MHz,  $\text{CDCl}_3$ ):  $\delta = 11.71$  (s, 1H, ArOH), 10.83 (s, 1H, ArOH), 8.43 (s, 1H, ArH), 8.10 (s, 1H, ArH), 8.07 (s, 1H, C=CH), 7.64 (s, 1H, C=CH), 7.54 (s, 1H, ArH), 7.44 (d,  $J = 8.9$  Hz, 2H, ArH), 7.28 (s, 1H, ArH), 7.00 (d,  $J = 8.9$  Hz, 2H, ArH), 6.86 (d,  $J = 23.6$  Hz, 2H, ArH), 5.60 (s, 1H, C–CH), 3.85 (s, 3H,  $\text{ArOCH}_3$ ), 2.43 (s, 3H,  $\text{ArCH}_3$ ), 2.34 (s, 6H,  $\text{ArCH}_3$ );  $^{13}\text{C}$  NMR (150 MHz,  $\text{CDCl}_3$ ):  $\delta = 194.8, 192.1, 176.1, 161.8, 159.5, 158.3, 155.4, 154.5, 145.7, 144.1, 143.2, 143.2, 137.3, 136.9, 133.4, 132.1, 130.2, 125.5, 124.4, 124.4, 123.7, 121.4, 120.6, 120.5, 120.5, 120.1, 120.0, 118.9, 117.6, 115.0, 115.0, 110.4, 55.8, 30.2, 20.9, 20.9, 20.8$ ; HRMS (TOF ES<sup>+</sup>):  $m/z$  calcd for  $\text{C}_{37}\text{H}_{28}\text{Cl}_3\text{N}_2\text{O}_7$  [(M+H)<sup>+</sup>], 717.0957, found, 717.1123.

**(4-(6,8-Dimethyl-4-oxo-4H-chromen-3-yl)-1-(4-methoxyphenyl)-1,4-dihydropyridazine-3,5-diyl)bis((2-hydroxy-3,5-dimethylphenyl)methanone) (4h)**



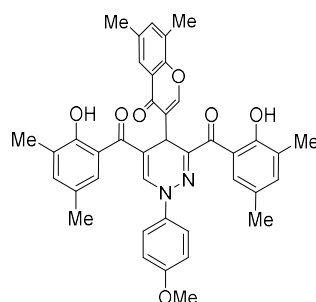

$V_{\text{Petroleum ether}}/V_{\text{Ethyl acetate}} = 10:1$ ,  $R_f = 0.25$ ; Red solid: 230 mg (70%); mp = 272–273 °C;  $^1\text{H NMR}$  (600 MHz,  $\text{CDCl}_3$ ):  $\delta = 11.90$  (s, 1H, ArOH), 11.00 (s, 1H, ArOH), 8.11 (s, 1H, ArH), 7.91 (s, 1H, C=CH), 7.76 (s, 1H, ArH), 7.65 (s, 1H, C=CH), 7.38 (d,  $J = 8.9$  Hz, 2H, ArH), 7.24 (d,  $J = 16.2$  Hz, 2H, ArH), 7.13 (d,  $J = 18.2$  Hz, 2H, ArH), 6.93 (d,  $J = 8.9$  Hz, 2H, ArH), 5.69 (s, 1H, C–CH), 3.83 (s, 3H,  $\text{ArOCH}_3$ ), 2.37 (s, 3H,  $\text{ArCH}_3$ ), 2.34 (s, 3H,  $\text{ArCH}_3$ ), 2.25 (s, 3H,  $\text{ArCH}_3$ ), 2.22 (s, 3H,  $\text{ArCH}_3$ ), 2.21 (s, 6H,  $\text{ArCH}_3$ );  $^{13}\text{C NMR}$  (150 MHz,  $\text{CDCl}_3$ ):  $\delta = 197.0, 194.9, 177.8, 159.7, 157.8, 157.2, 154.9, 153.2, 144.0, 138.6, 137.3, 137.0, 136.9, 135.9, 134.7, 131.3, 128.3, 127.5, 127.4, 127.2, 127.1, 126.6, 124.3, 122.5, 120.9, 120.1, 120.1, 119.2, 117.9, 114.7, 114.7, 110.8, 55.8, 30.9, 20.9, 20.8, 20.7, 15.8, 15.8, 15.6$ ; HRMS (TOF ES<sup>+</sup>):  $m/z$  calcd for  $\text{C}_{40}\text{H}_{36}\text{N}_2\text{NaO}_7$  [(M+Na)<sup>+</sup>], 679.2415, found, 679.2479.

**(4-(6,8-Dichloro-4-oxo-4H-chromen-3-yl)-1-(4-methoxyphenyl)-1,4-dihydropyridazine-3,5-diyl)bis((3,5-dichloro-2-hydroxyphenyl)methanone) (4i)**

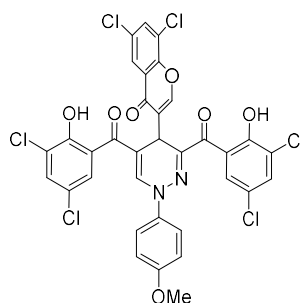

$V_{\text{Petroleum ether}}/V_{\text{Ethyl acetate}} = 7:1$ ,  $R_f = 0.25$ ; Red solid: 295 mg (76%); mp = 172–173 °C;  $^1\text{H NMR}$  (600 MHz,  $\text{CDCl}_3$ ):  $\delta = 12.11$  (s, 1H, ArOH), 10.90 (s, 1H, ArOH), 8.35 (d,  $J = 2.6$  Hz, 1H, ArH), 8.25 (s, 1H, C=CH), 8.03 (d,  $J = 2.5$  Hz, 1H, ArH), 7.68 (d,  $J = 2.6$  Hz, 1H, ArH), 7.63 (s, 1H, C=CH), 7.56–7.50 (m, 2H, ArH), 7.43–7.40 (m, 3H, ArH), 7.01 (d,  $J = 8.8$  Hz, 2H, ArH), 5.63 (s, 1H, C–CH), 3.86 (s, 3H,  $\text{ArOCH}_3$ );  $^{13}\text{C NMR}$  (150 MHz,  $\text{CDCl}_3$ ):  $\delta = 194.0, 192.0, 175.7, 158.8, 157.5, 155.7, 155.0, 150.7, 142.8, 138.3, 136.5, 135.9, 134.5, 134.2, 131.6, 131.3, 128.2, 126.3, 124.7, 124.2, 123.9, 123.9, 123.7, 123.5, 121.6, 121.5, 120.9, 120.9, 119.8, 115.1, 115.1, 110.1, 55.8, 30.1$ ; HRMS (TOF ES<sup>+</sup>):  $m/z$  calcd for  $\text{C}_{34}\text{H}_{18}\text{Cl}_6\text{N}_2\text{NaO}_7$  [(M+Na)<sup>+</sup>], 798.9137, found, 798.9140.

**(4-(4-Oxo-4H-chromen-3-yl)-1-phenyl-1,4-dihydropyridazine-3,5-diyl)bis((2-hydroxyphenyl)methanone) (4j)**

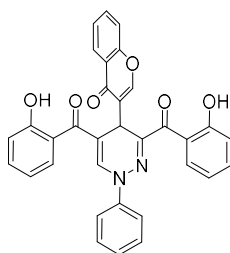

$V_{\text{Petroleum ether}}/V_{\text{Ethyl acetate}} = 8:1$ ,  $R_f = 0.25$ ; Yellow solid: 192 mg (71%); mp = 243–244 °C;  $^1\text{H}$  NMR (600 MHz,  $\text{DMSO-}d_6$ ):  $\delta = 10.43$  (s, 1H, ArOH), 10.11 (s, 1H, ArOH), 8.34 (s, 1H, C=CH), 7.99 (d,  $J = 7.7$  Hz, 1H, ArH), 7.78 (t,  $J = 7.9$  Hz, 1H, ArH), 7.68 (s, 1H, C=CH), 7.62 (d,  $J = 8.4$  Hz, 1H, ArH), 7.53 (d,  $J = 7.7$  Hz, 1H, ArH), 7.45 (t,  $J = 7.6$  Hz, 1H, ArH), 7.41–7.39 (m, 3H, ArH), 7.35–7.32 (m, 3H, ArH), 7.30 (d,  $J = 7.6$  Hz, 1H, ArH), 7.21 (t,  $J = 7.3$  Hz, 1H, ArH), 6.93 (d,  $J = 8.2$  Hz, 1H, ArH), 6.91–6.88 (m, 2H, ArH), 6.87–6.85 (m, 1H, ArH), 5.49 (s, 1H, C–CH);  $^{13}\text{C}$  NMR (150 MHz,  $\text{DMSO-}d_6$ ):  $\delta = 193.5, 192.9, 175.7, 158.5, 155.6, 155.6, 155.2, 145.4, 142.9, 138.4, 134.3, 134.2, 131.9, 131.2, 129.7, 129.7, 125.7, 125.7, 125.7, 125.2, 123.5, 123.1, 121.9, 121.9, 119.2, 118.8, 118.5, 117.9, 117.9, 116.9, 116.6, 110.7, 28.3$ ; HRMS (TOF ES<sup>+</sup>):  $m/z$  calcd for  $\text{C}_{33}\text{H}_{23}\text{N}_2\text{O}_6$  [(M+H)<sup>+</sup>], 543.1551, found, 543.1594.

**(1-(3,5-Dimethylphenyl)-4-(4-oxo-4H-chromen-3-yl)-1,4-dihydropyridazine-3,5-diyl)bis((2-hydroxyphenyl)methanone) (4k)**

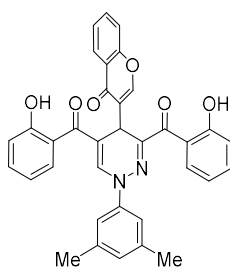

$V_{\text{Petroleum ether}}/V_{\text{Ethyl acetate}} = 9:1$ ,  $R_f = 0.25$ ; Yellow solid: 237 mg (83%); mp = 160–161 °C;  $^1\text{H}$  NMR (600 MHz,  $\text{CDCl}_3$ ):  $\delta = 11.75$  (s, 1H, ArOH), 10.98 (s, 1H, ArOH), 8.26–8.23 (m, 1H, ArH), 8.14–8.12 (m, 1H, ArH), 8.11 (s, 1H, C=CH), 7.71 (s, 1H, C=CH), 7.64–7.59 (m, 2H, ArH), 7.46–7.42 (m, 2H, ArH), 7.40 (d,  $J = 8.4$  Hz, 1H, ArH), 7.33 (t,  $J = 7.5$  Hz, 1H, ArH), 7.09 (s, 2H, ArH), 7.01 (d,  $J = 8.2$  Hz, 1H, ArH), 6.97 (d,  $J = 8.2$  Hz, 1H, ArH), 6.92–6.88 (m, 2H, ArH), 6.85 (t,  $J = 7.5$  Hz, 1H, ArH), 5.68 (s, 1H, C–CH), 2.34 (s, 6H, ArCH<sub>3</sub>);  $^{13}\text{C}$  NMR (150 MHz,  $\text{CDCl}_3$ ):  $\delta = 196.6, 194.8, 177.3, 163.3, 161.2, 156.3, 155.4, 143.7, 143.4, 139.6, 139.6, 137.2, 136.6, 135.1, 134.2, 133.8, 130.9, 127.9, 125.7, 125.3, 124.7, 121.3, 120.2, 119.0, 118.9, 118.9, 118.5, 118.4, 118.1, 116.5, 116.5, 110.6, 30.7, 21.7, 21.7$ ; HRMS (TOF ES<sup>+</sup>):  $m/z$  calcd for  $\text{C}_{35}\text{H}_{26}\text{N}_2\text{NaO}_6$  [(M+Na)<sup>+</sup>], 593.1683, found, 593.1686.

**(4-(4-Oxo-4H-chromen-3-yl)-1-(m-tolyl)-1,4-dihydropyridazine-3,5-diyl)bis((2-hydroxyphenyl)methanone) (4l)**

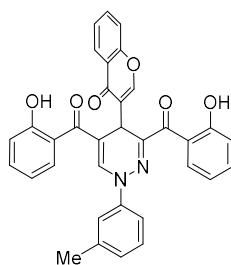

$V_{\text{Petroleum ether}}/V_{\text{Ethyl acetate}} = 8:1$ ,  $R_f = 0.25$ ; Yellow solid: 228 mg (82%); mp = 226–227 °C;  $^1\text{H}$  NMR (600 MHz,  $\text{CDCl}_3$ ):  $\delta = 11.73$  (s, 1H, ArOH), 10.96 (s, 1H, ArOH), 8.26–8.22 (m, 1H, ArH), 8.14–8.11 (m, 2H, C=CH and ArH), 7.73 (s, 1H, C=CH), 7.64–7.59 (m, 2H, ArH), 7.46–7.42 (m, 2H, ArH), 7.41 (d,  $J = 8.4$  Hz, 1H, ArH), 7.35–7.30 (m, 2H, ArH), 7.29 (s, 1H, ArH), 7.27 (s, 1H, ArH), 7.07 (d,  $J = 7.3$  Hz, 1H, ArH), 7.01 (d,  $J = 8.2$  Hz, 1H, ArH), 6.97 (d,  $J = 8.3$  Hz, 1H, ArH), 6.92–6.88 (m, 1H, ArH), 6.86–6.83 (m, 1H, ArH), 5.69 (s, 1H, C–CH), 2.39 (s, 3H, ArCH<sub>3</sub>);  $^{13}\text{C}$  NMR (150 MHz,  $\text{CDCl}_3$ ):  $\delta = 196.6, 194.8, 177.4, 163.3, 161.2, 156.3, 155.4, 143.9, 143.4, 139.9, 137.1, 136.6, 135.2, 134.2, 133.8, 130.9, 129.6, 126.9, 125.7, 125.4, 124.7, 121.2, 120.2, 119.3, 119.1, 118.9, 118.9, 118.5, 118.4, 118.1, 115.7, 110.8, 30.8, 21.8$ ; HRMS (TOF ES<sup>+</sup>):  $m/z$  calcd for  $\text{C}_{34}\text{H}_{24}\text{N}_2\text{NaO}_6$  [(M+Na)<sup>+</sup>], 579.1527, found, 579.1517.

**(1-(4-Isopropylphenyl)-4-(4-oxo-4H-chromen-3-yl)-1,4-dihydropyridazine-3,5-diyl)bis((2-hydroxyphenyl)methanone) (4m)**

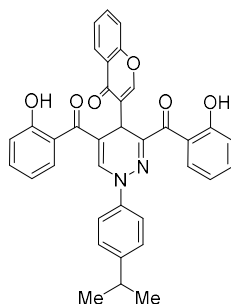

$V_{\text{Petroleum ether}}/V_{\text{Ethyl acetate}} = 10:1$ ,  $R_f = 0.25$ ; Yellow solid: 213 mg (73%); mp = 231–232 °C;  $^1\text{H}$  NMR (500 MHz,  $\text{CDCl}_3$ ):  $\delta = 11.72$  (s, 1H, ArOH), 10.92 (s, 1H, ArOH), 8.25–8.22 (m, 1H, ArH), 8.14–8.10 (m, 2H, C=CH and ArH), 7.72 (s, 1H, C=CH), 7.63–7.58 (m, 2H, ArH), 7.46–7.42 (m, 2H, ArH), 7.41–7.39 (m, 3H, ArH), 7.33 (t,  $J = 7.5$  Hz, 1H, ArH), 7.28 (d,  $J = 8.5$  Hz, 2H, ArH), 7.01 (d,  $J = 8.2$  Hz, 1H, ArH), 6.97 (d,  $J = 8.3$  Hz, 1H, ArH), 6.89 (t,  $J = 7.5$  Hz, 1H, ArH), 6.85 (t,  $J = 7.6$  Hz, 1H, ArH), 5.70 (s, 1H, C–CH), 2.98–2.89 (m, 1H, CH), 1.27 (s, 3H, CCH<sub>3</sub>), 1.25 (s, 3H, CCH<sub>3</sub>);  $^{13}\text{C}$  NMR (125 MHz,  $\text{CDCl}_3$ ):  $\delta = 196.6, 194.9, 177.3, 163.3, 161.2, 156.3, 155.4, 147.1, 143.8, 141.4, 137.3, 136.5, 135.1, 134.1, 133.8, 130.9, 127.7, 127.7, 125.7, 125.3, 124.7, 121.4, 120.3, 119.1, 119.0, 118.9, 118.8, 118.8, 118.5, 118.4, 118.1, 110.7, 33.8, 30.7, 24.1, 24.1$ ; HRMS (TOF ES<sup>+</sup>):  $m/z$  calcd for  $\text{C}_{36}\text{H}_{28}\text{N}_2\text{NaO}_6$  [(M+Na)<sup>+</sup>], 607.1840, found, 607.1846.

**(1-(4-Chlorophenyl)-4-(4-oxo-4H-chromen-3-yl)-1,4-dihydropyridazine-3,5-diyl)bis((2-hydroxyphenyl)methanone) (4n)**

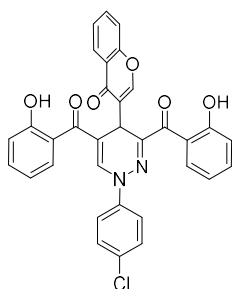

$V_{\text{Petroleum ether}}/V_{\text{Ethyl acetate}} = 8:1$ ,  $R_f = 0.25$ ; Yellow solid: 207 mg (72%); mp = 214–215 °C;  $^1\text{H}$  NMR (600 MHz,  $\text{CDCl}_3$ ):  $\delta = 11.65$  (s, 1H, ArOH), 10.91 (s, 1H, ArOH), 8.18–8.15 (m, 1H, ArH), 8.13 (s, 1H, C=CH), 8.12–8.09 (m, 1H, ArH), 7.67 (s, 1H, C=CH), 7.63–7.59 (m, 2H, ArH), 7.47–7.43 (m, 2H, ArH), 7.41 (d,  $J = 2.6$  Hz, 1H, ArH), 7.41–7.36 (m, 4H, ArH), 7.34 (t,  $J = 7.5$  Hz, 1H, ArH), 7.01 (d,  $J = 8.2$  Hz, 1H, ArH), 6.97 (d,  $J = 8.2$  Hz, 1H, ArH), 6.91 (t,  $J = 7.5$  Hz, 1H, ArH), 6.84 (t,  $J = 7.6$  Hz, 1H, ArH), 5.67 (s, 1H, C–CH);  $^{13}\text{C}$  NMR (150 MHz,  $\text{CDCl}_3$ ):  $\delta = 196.6$ , 194.8, 177.4, 163.3, 161.2, 156.3, 155.6, 144.2, 141.9, 136.7, 136.4, 135.3, 133.9, 133.9, 131.4, 130.8, 129.8, 129.8, 125.6, 125.5, 124.6, 120.9, 120.1, 119.6, 119.6, 119.1, 119.0, 118.9, 118.6, 118.4, 118.2, 111.3, 30.8; HRMS (TOF ES<sup>+</sup>):  $m/z$  calcd for  $\text{C}_{33}\text{H}_{21}\text{ClN}_2\text{NaO}_6$  [(M+Na)<sup>+</sup>], 599.0980, found, 599.0997.

**(1-(4-Bromophenyl)-4-(4-oxo-4H-chromen-3-yl)-1,4-dihydropyridazine-3,5-diyl)bis((2-hydroxyphenyl)methanone) (4o)**

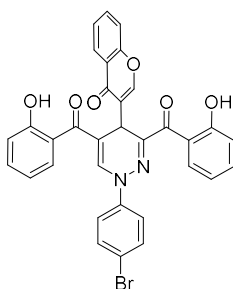

$V_{\text{Petroleum ether}}/V_{\text{Ethyl acetate}} = 8:1$ ,  $R_f = 0.25$ ; Yellow solid: 248 mg (80%); mp = 176–177 °C;  $^1\text{H}$  NMR (600 MHz,  $\text{CDCl}_3$ ):  $\delta = 11.65$  (s, 1H, ArOH), 10.91 (s, 1H, ArOH), 8.18–8.14 (m, 1H, ArH), 8.13 (s, 1H, C=CH), 8.12–8.09 (m, 1H, ArH), 7.67 (s, 1H, C=CH), 7.63–7.60 (m, 2H, ArH), 7.53 (d,  $J = 8.8$  Hz, 2H, ArH), 7.47–7.43 (m, 2H, ArH), 7.41 (d,  $J = 8.4$  Hz, 1H, ArH), 7.36–7.32 (m, 3H, ArH), 7.01 (d,  $J = 8.2$  Hz, 1H, ArH), 6.97 (d,  $J = 8.3$  Hz, 1H, ArH), 6.91 (t,  $J = 7.5$  Hz, 1H, ArH), 6.84 (t,  $J = 7.6$  Hz, 1H, ArH), 5.67 (s, 1H, C–CH);  $^{13}\text{C}$  NMR (150 MHz,  $\text{CDCl}_3$ ):  $\delta = 196.6$ , 194.7, 177.4, 163.3, 161.2, 156.3, 155.6, 144.2, 142.4, 136.8, 136.2, 135.4, 133.9, 133.9, 132.7, 132.7, 130.8, 125.6, 125.5, 124.6, 120.9, 120.0, 119.9, 119.9, 119.1, 119.0, 119.0, 118.9, 118.6, 118.4, 118.2, 111.4, 30.8; HRMS (TOF ES<sup>+</sup>):  $m/z$  calcd for  $\text{C}_{33}\text{H}_{21}\text{BrN}_2\text{NaO}_6$  [(M+Na)<sup>+</sup>], 643.0475, found, 643.0477.

**(1-(3-Chlorophenyl)-4-(4-oxo-4H-chromen-3-yl)-1,4-dihydropyridazine-3,5-diyl)bis((2-hydroxyphenyl)methanone) (4p)**

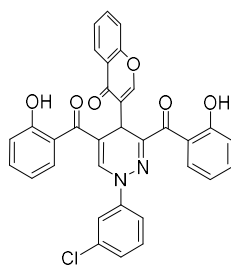

$V_{\text{Petroleum ether}}/V_{\text{Ethyl acetate}} = 8:1$ ,  $R_f = 0.25$ ; Yellow solid: 176 mg (61%); mp = 228–229 °C;  $^1\text{H}$  NMR (600 MHz,  $\text{CDCl}_3$ ):  $\delta = 11.65$  (s, 1H, ArOH), 10.92 (s, 1H, ArOH), 8.18 (d,  $J = 8.0$  Hz, 1H, ArH), 8.13 (s, 1H, C=CH), 8.11 (d,  $J = 8.2$  Hz, 1H, ArH), 7.68 (s, 1H, C=CH), 7.64–7.59 (m, 2H, ArH), 7.49 (s, 1H, ArH), 7.49–7.43 (m, 2H, ArH), 7.41 (d,  $J = 8.4$  Hz, 1H, ArH), 7.37–7.33 (m, 3H, ArH), 7.22 (d,  $J = 7.0$  Hz, 1H, ArH), 7.02 (d,  $J = 8.2$  Hz, 1H, ArH), 6.98 (d,  $J = 8.3$  Hz, 1H, ArH), 6.93 (t,  $J = 7.5$  Hz, 1H, ArH), 6.87 (t,  $J = 7.6$  Hz, 1H, ArH), 5.67 (s, 1H, C–CH);  $^{13}\text{C}$  NMR (150 MHz,  $\text{CDCl}_3$ ):  $\delta = 196.7, 194.7, 177.4, 163.4, 161.3, 156.3, 155.6, 144.3, 144.2, 136.8, 136.0, 135.6, 135.4, 133.9, 133.9, 130.8, 130.8, 125.9, 125.6, 125.5, 124.6, 120.9, 120.0, 119.2, 119.1, 118.9, 118.6, 118.6, 118.4, 118.2, 116.1, 111.5, 30.9$ ; HRMS (TOF ES<sup>+</sup>):  $m/z$  calcd for  $\text{C}_{33}\text{H}_{21}\text{ClN}_2\text{NaO}_6$  [(M+Na)<sup>+</sup>], 599.0980, found, 599.0972.

**(1-(2-Fluorophenyl)-4-(4-oxo-4H-chromen-3-yl)-1,4-dihydropyridazine-3,5-diyl)bis((2-hydroxyphenyl)methanone) (4q)**

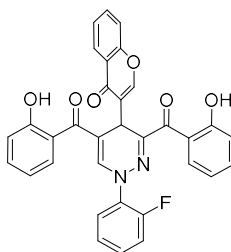

$V_{\text{Petroleum ether}}/V_{\text{Ethyl acetate}} = 8:1$ ,  $R_f = 0.25$ ; Yellow solid: 176 mg (63%); mp = 223–224 °C;  $^1\text{H}$  NMR (600 MHz,  $\text{CDCl}_3$ ):  $\delta = 11.71$  (s, 1H, ArOH), 11.02 (s, 1H, ArOH), 8.17 (t,  $J = 8.3$  Hz, 2H, ArH), 8.12 (s, 1H, C=CH), 7.65 (d,  $J = 7.6$  Hz, 1H, ArH), 7.64–7.60 (m, 2H, ArH), 7.59 (s, 1H, C=CH), 7.43–7.40 (m, 3H, ArH), 7.34 (t,  $J = 7.4$  Hz, 1H, ArH), 7.26–7.18 (m, 3H, ArH), 7.00–6.94 (m, 2H, ArH), 6.88 (t,  $J = 7.4$  Hz, 1H, ArH), 6.81 (t,  $J = 7.5$  Hz, 1H, ArH), 5.71 (s, 1H, C–CH);  $^{13}\text{C}$  NMR (150 MHz,  $\text{CDCl}_3$ ):  $\delta = 196.6, 194.9, 177.3, 163.4, 161.2, 156.3, 154.6$  ( $J = 249.2$  Hz), 144.6, 139.7, 139.7, 136.7, 135.3, 133.9 ( $J = 31.3$  Hz), 131.8 ( $J = 9.0$  Hz), 131.2, 128.1 ( $J = 7.6$  Hz), 125.8, 125.4, 125.2 ( $J = 3.8$  Hz), 124.7, 124.5, 124.5, 121.1, 119.9, 119.0, 118.9, 118.9, 118.4, 118.4, 118.1, 117.2 ( $J = 19.9$  Hz), 110.0, 30.5; HRMS (TOF ES<sup>+</sup>):  $m/z$  calcd for  $\text{C}_{33}\text{H}_{21}\text{FN}_2\text{NaO}_6$  [(M+Na)<sup>+</sup>], 583.1276, found, 583.1280.

**(1-(4-Ethynylphenyl)-4-(4-oxo-4H-chromen-3-yl)-1,4-dihydropyridazine-3,5-diyl)bis((2-hydroxyphenyl)methanone) (4r)**

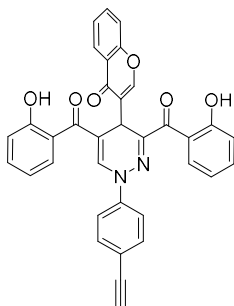

$V_{\text{Petroleum ether}}/V_{\text{Ethyl acetate}} = 5:1$ ,  $R_f = 0.25$ ; Yellow solid: 190 mg (67%); mp = 236–237 °C;  $^1\text{H NMR}$  (600 MHz,  $\text{CDCl}_3$ ):  $\delta = 11.65$  (s, 1H, ArOH), 10.92 (s, 1H, ArOH), 8.18 (d,  $J = 8.1$  Hz, 1H, ArH), 8.13 (s, 1H, C=CH), 8.10 (d,  $J = 8.0$  Hz, 1H, ArH), 7.72 (s, 1H, C=CH), 7.64–7.60 (m, 2H, ArH), 7.54 (d,  $J = 8.5$  Hz, 2H, ArH), 7.47–7.44 (m, 2H, ArH), 7.42–7.40 (m, 3H, ArH), 7.34 (t,  $J = 7.5$  Hz, 1H, ArH), 7.02 (d,  $J = 8.2$  Hz, 1H, ArH), 6.98 (d,  $J = 8.3$  Hz, 1H, ArH), 6.92 (t,  $J = 7.5$  Hz, 1H, ArH), 6.85 (t,  $J = 7.6$  Hz, 1H, ArH), 5.67 (s, 1H, C–CH), 3.12 (s, 1H, C≡CH);  $^{13}\text{C NMR}$  (150 MHz,  $\text{CDCl}_3$ ):  $\delta = 196.7, 194.8, 177.4, 163.4, 161.3, 156.3, 155.6, 144.4, 143.2, 136.8, 135.9, 135.4, 134.0, 133.9, 133.6, 133.6, 130.8, 125.6, 125.5, 124.6, 120.9, 120.0, 119.4, 119.2, 119.1, 118.9, 118.6, 118.4, 118.2, 117.8, 117.8, 111.6, 82.9, 78.1, 30.9$ ; HRMS (TOF ES<sup>+</sup>): m/z calcd for  $\text{C}_{35}\text{H}_{22}\text{N}_2\text{NaO}_6$  [(M+Na)<sup>+</sup>], 589.1370, found, 589.1360.

**(1-([1,1'-Biphenyl]-4-yl)-4-(4-oxo-4H-chromen-3-yl)-1,4-dihydropyridazine-3,5-diyl)bis((2-hydroxyphenyl)methanone) (4s)**

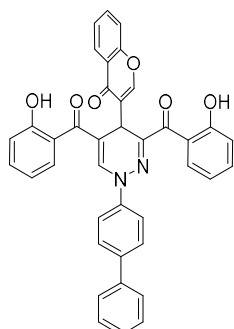

$V_{\text{Petroleum ether}}/V_{\text{Ethyl acetate}} = 8:1$ ,  $R_f = 0.25$ ; Red solid: 238 mg (77%); mp = 252–253 °C;  $^1\text{H NMR}$  (600 MHz,  $\text{CDCl}_3$ ):  $\delta = 11.72$  (s, 1H, ArOH), 10.96 (s, 1H, ArOH), 8.27–8.24 (m, 1H, ArH), 8.14 (s, 1H, C=CH), 8.15–8.11 (m, 1H, ArH), 7.79 (s, 1H, ArH), 7.68–7.65 (m, 2H, ArH), 7.65 (s, 1H, C=CH), 7.63–7.60 (m, 1H, ArH), 7.59 (d,  $J = 7.3$  Hz, 2H, ArH), 7.54 (d,  $J = 8.6$  Hz, 2H, ArH), 7.48–7.43 (m, 4H, ArH), 7.41 (d,  $J = 8.4$  Hz, 1H, ArH), 7.37 (t,  $J = 7.4$  Hz, 1H, ArH), 7.34 (t,  $J = 7.6$  Hz, 1H, ArH), 7.03 (d,  $J = 8.1$  Hz, 1H, ArH), 6.99 (d,  $J = 8.1$  Hz, 1H, ArH), 6.93 (t,  $J = 7.3$  Hz, 1H, ArH), 6.88 (t,  $J = 7.4$  Hz, 1H, ArH), 5.71 (s, 1H, C–CH);  $^{13}\text{C NMR}$  (150 MHz,  $\text{CDCl}_3$ ):  $\delta = 196.6, 194.8, 177.4, 163.3, 161.2, 156.3, 155.5, 144.1, 142.5, 140.1, 138.9, 136.7, 136.6, 135.2, 134.1, 133.9, 130.9, 129.0, 129.0, 128.4, 128.4, 127.6, 127.1, 127.1, 125.7, 125.4, 124.7, 121.1, 120.2, 119.1, 119.0, 118.9, 118.7, 118.7, 118.5, 118.4, 118.2, 111.1, 30.8$ ; HRMS (TOF ES<sup>+</sup>): m/z calcd for  $\text{C}_{39}\text{H}_{26}\text{N}_2\text{NaO}_6$  [(M+Na)<sup>+</sup>], 641.1683, found, 641.1491.

**(4-(6,7-dimethoxy-4-oxo-4H-chromen-3-yl)-1-(4-methoxyphenyl)-1,4-dihydropyridazine-3,5-diyl)bis((2-hydroxyphenyl)methanone) (4t)**

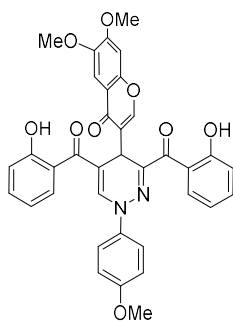

$V_{\text{Petroleum ether}}/V_{\text{Ethyl acetate}} = 2:1$ ,  $R_f = 0.25$ ; Yellow solid: 238 mg (58%); mp = 241–242 °C;  $^1\text{H}$  NMR (600 MHz,  $\text{CDCl}_3$ ):  $\delta = 11.73$  (s, 1H, ArOH), 10.93 (s, 1H, ArOH), 8.22 (s, 1H, ArH), 8.05 (s, 1H, C=CH), 7.65 (s, 1H, ArH), 7.62 (s, 1H, C=CH), 7.44–7.40 (m, 5H, ArH), 7.01–6.88 (m, 5H, ArH), 6.82 (d,  $J = 21.8$  Hz, 2H, ArH), 5.67 (s, 1H, C-CH), 3.92 (s, 3H, ArOCH<sub>3</sub>), 3.91 (s, 3H, ArOCH<sub>3</sub>), 3.82 (s, 3H, ArOCH<sub>3</sub>);  $^{13}\text{C}$  NMR (150 MHz,  $\text{CDCl}_3$ ):  $\delta = 196.4, 194.8, 176.3, 163.1, 160.9, 157.9, 154.5, 154.4, 152.4, 147.6, 143.7, 137.5, 137.1, 136.3, 134.9, 134.0, 130.7, 120.6, 120.4, 120.4, 120.2, 118.9, 118.9, 118.8, 118.3, 118.1, 117.9, 114.7, 114.7, 110.4, 104.0, 99.6, 56.5, 56.4, 55.7, 30.5$ ; HRMS (TOF ES<sup>+</sup>):  $m/z$  calcd for  $\text{C}_{36}\text{H}_{28}\text{N}_2\text{NaO}_9$  [(M+Na)<sup>+</sup>], 655.1687, found, 655.1681.

#### Failed examples:

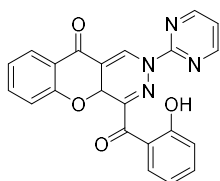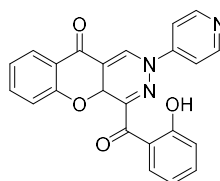

## 5. X-ray Structure and Data.

### 5.1 X-ray Structure and Data<sup>5</sup> of 3s (CCDC 2286041).

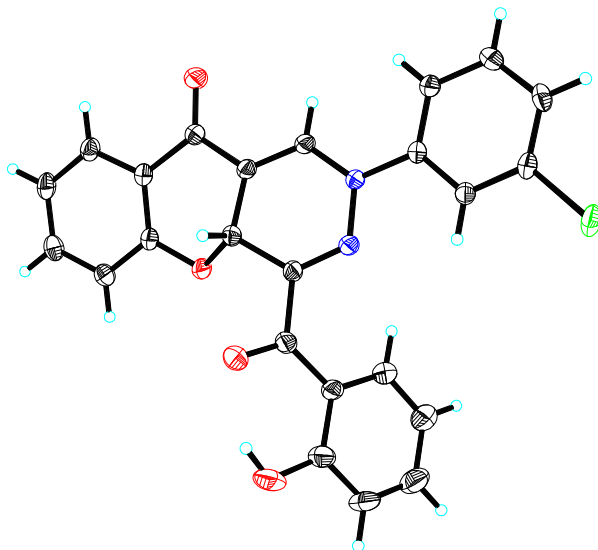

Figure S1 X-Ray crystal structure of 3s.

Table S3 Crystal data and structure refinement for 3s.

|                                   |                                                                 |                          |
|-----------------------------------|-----------------------------------------------------------------|--------------------------|
| Empirical formula                 | C <sub>24</sub> H <sub>15</sub> ClN <sub>2</sub> O <sub>4</sub> |                          |
| Formula weight                    | 430.83                                                          |                          |
| Temperature                       | 296.15 K                                                        |                          |
| Crystal system, space group       | Monoclinic, P2(1)/c                                             |                          |
| Unit cell dimensions              | a = 7.4673(10) Å                                                | alpha = 90 deg.          |
|                                   | b = 34.647(5) Å                                                 | beta = 100.3200(10) deg. |
|                                   | c = 7.6160(17) Å                                                | gamma = 90 deg.          |
| Volume                            | 1938.5(6) Å <sup>3</sup>                                        |                          |
| Z, Calculated density             | 4, 1.476 Mg/m <sup>3</sup>                                      |                          |
| Absorption coefficient            | 0.234 mm <sup>-1</sup>                                          |                          |
| F(000)                            | 888.0                                                           |                          |
| Theta range for data collection   | 2.35 to 55.108 deg.                                             |                          |
| Limiting indices                  | -9 ≤ h ≤ 9, -44 ≤ k ≤ 44, -9 ≤ l ≤ 8                            |                          |
| Reflections collected / unique    | 11555 / 4363 [R(int) = 0.0274]                                  |                          |
| Data/restraints/parameters        | 4363 / 0 / 281                                                  |                          |
| Goodness-of-fit on F <sup>2</sup> | 1.085                                                           |                          |
| Final R indices [I > 2σ(I)]       | R1 = 0.0519, wR2 = 0.1209                                       |                          |
| R indices (all data)              | R1 = 0.0761, wR2 = 0.1361                                       |                          |
| Largest diff. peak and hole       | 0.25 and -0.37 e.Å <sup>-3</sup>                                |                          |



## 5.2 X-ray Structure and Data<sup>6</sup> of 4j (CCDC 2312821).

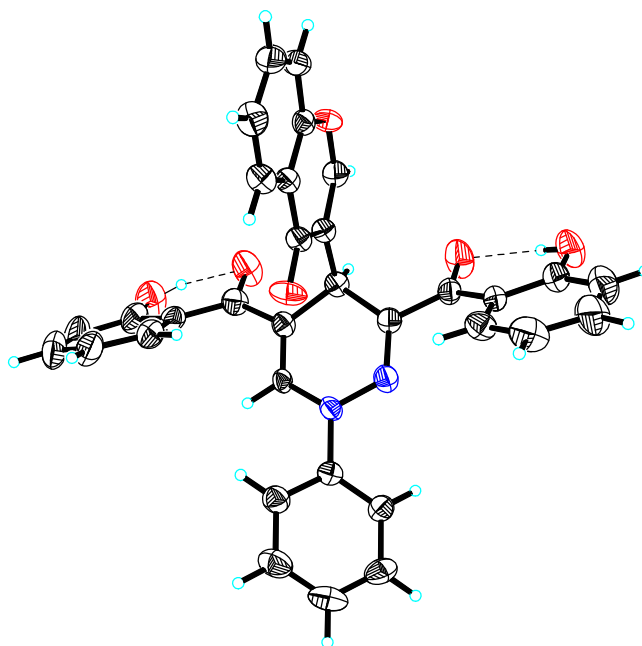

**Figure S2** X-Ray crystal structure of **4j**.

**Table S4** Crystal data and structure refinement for **4j**.

|                                   |                                                               |                       |
|-----------------------------------|---------------------------------------------------------------|-----------------------|
| Empirical formula                 | C <sub>33</sub> H <sub>22</sub> N <sub>2</sub> O <sub>6</sub> |                       |
| Formula weight                    | 542.52                                                        |                       |
| Temperature                       | 296.15 K                                                      |                       |
| Crystal system, space group       | Monoclinic, P2(1)/c                                           |                       |
| Unit cell dimensions              | a = 10.784(3) Å                                               | alpha = 90 deg.       |
|                                   | b = 19.095(6) Å                                               | beta = 92.648(7) deg. |
|                                   | c = 12.933(4) Å                                               | gamma = 90 deg.       |
| Volume                            | 2660.4(14) Å <sup>3</sup>                                     |                       |
| Z, Calculated density             | 4, 1.355 Mg/m <sup>3</sup>                                    |                       |
| Absorption coefficient            | 0.094 mm <sup>-1</sup>                                        |                       |
| F(000)                            | 1128.0                                                        |                       |
| Theta range for data collection   | 5.262 to 55.16 deg.                                           |                       |
| Limiting indices                  | -11 ≤ h ≤ 14, -24 ≤ k ≤ 24, -16 ≤ l ≤ 16                      |                       |
| Reflections collected / unique    | 15919 / 6029 [R(int) = 0.1040]                                |                       |
| Data/restraints/parameters        | 6029 / 0 / 372                                                |                       |
| Goodness-of-fit on F <sup>2</sup> | 0.930                                                         |                       |
| Final R indices [I > 2σ(I)]       | R1 = 0.0731, wR2 = 0.1301                                     |                       |
| R indices (all data)              | R1 = 0.2365, wR2 = 0.1797                                     |                       |
| Largest diff. peak and hole       | 0.27 and -0.24 e.Å <sup>-3</sup>                              |                       |

**6.  $^1\text{H}$  NMR and  $^{13}\text{C}$  NMR spectra for spectroscopic data.**

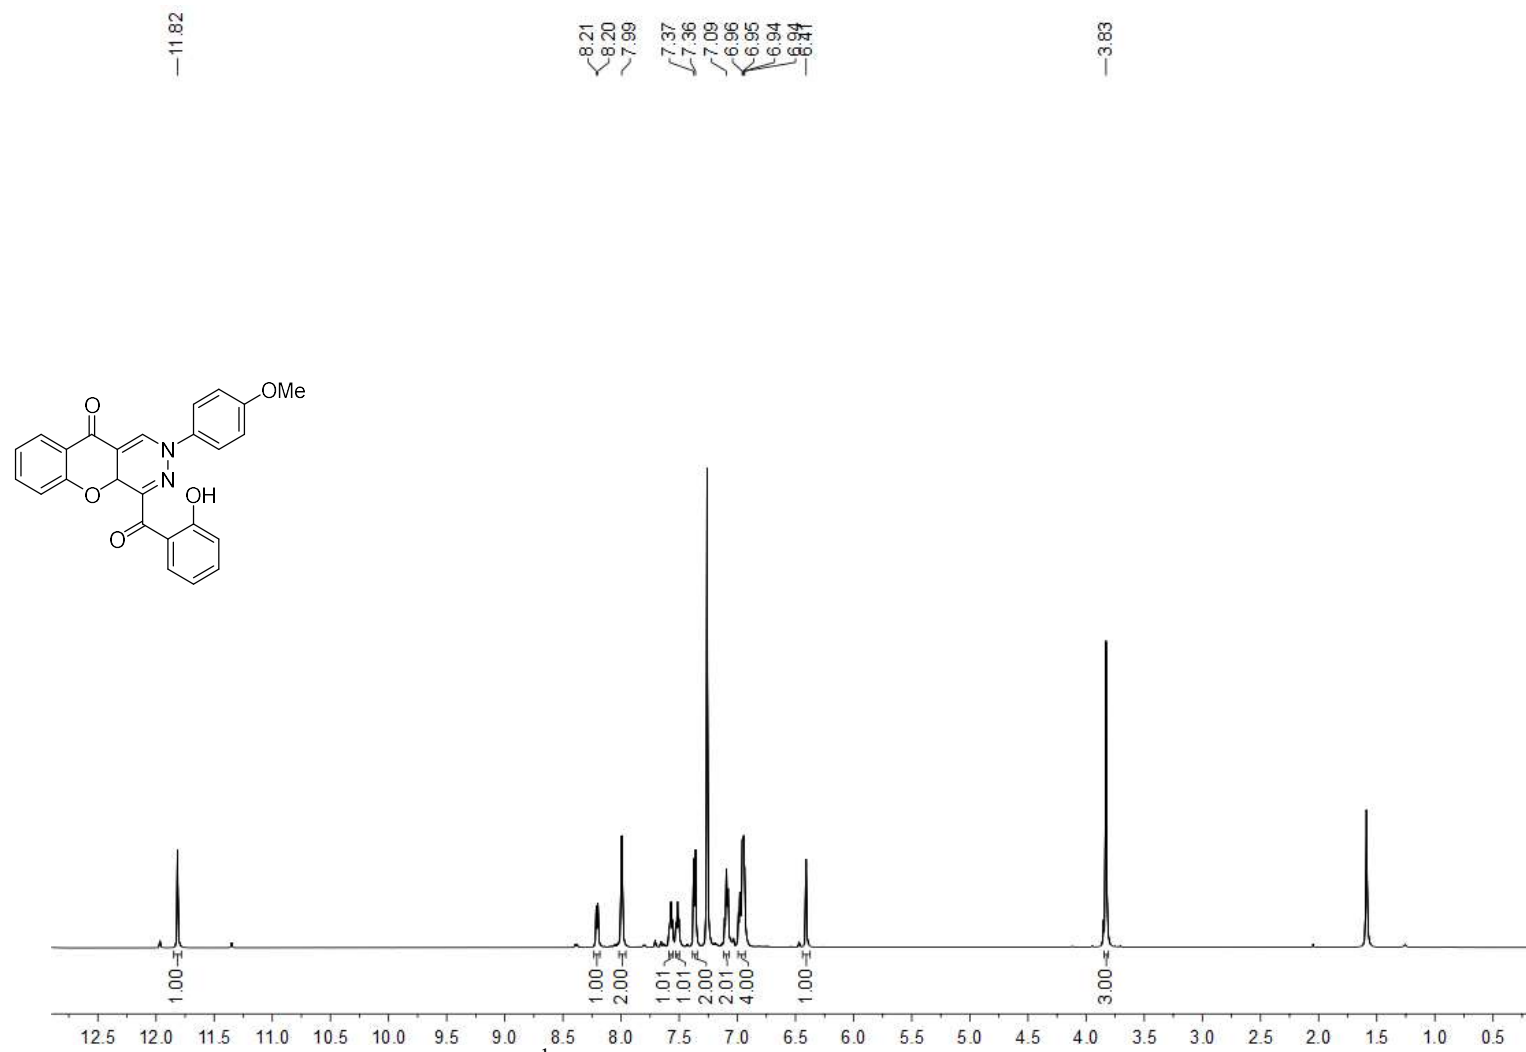

Figure S3. <sup>1</sup>H NMR (600 MHz, CDCl<sub>3</sub>) spectra of compound 3a

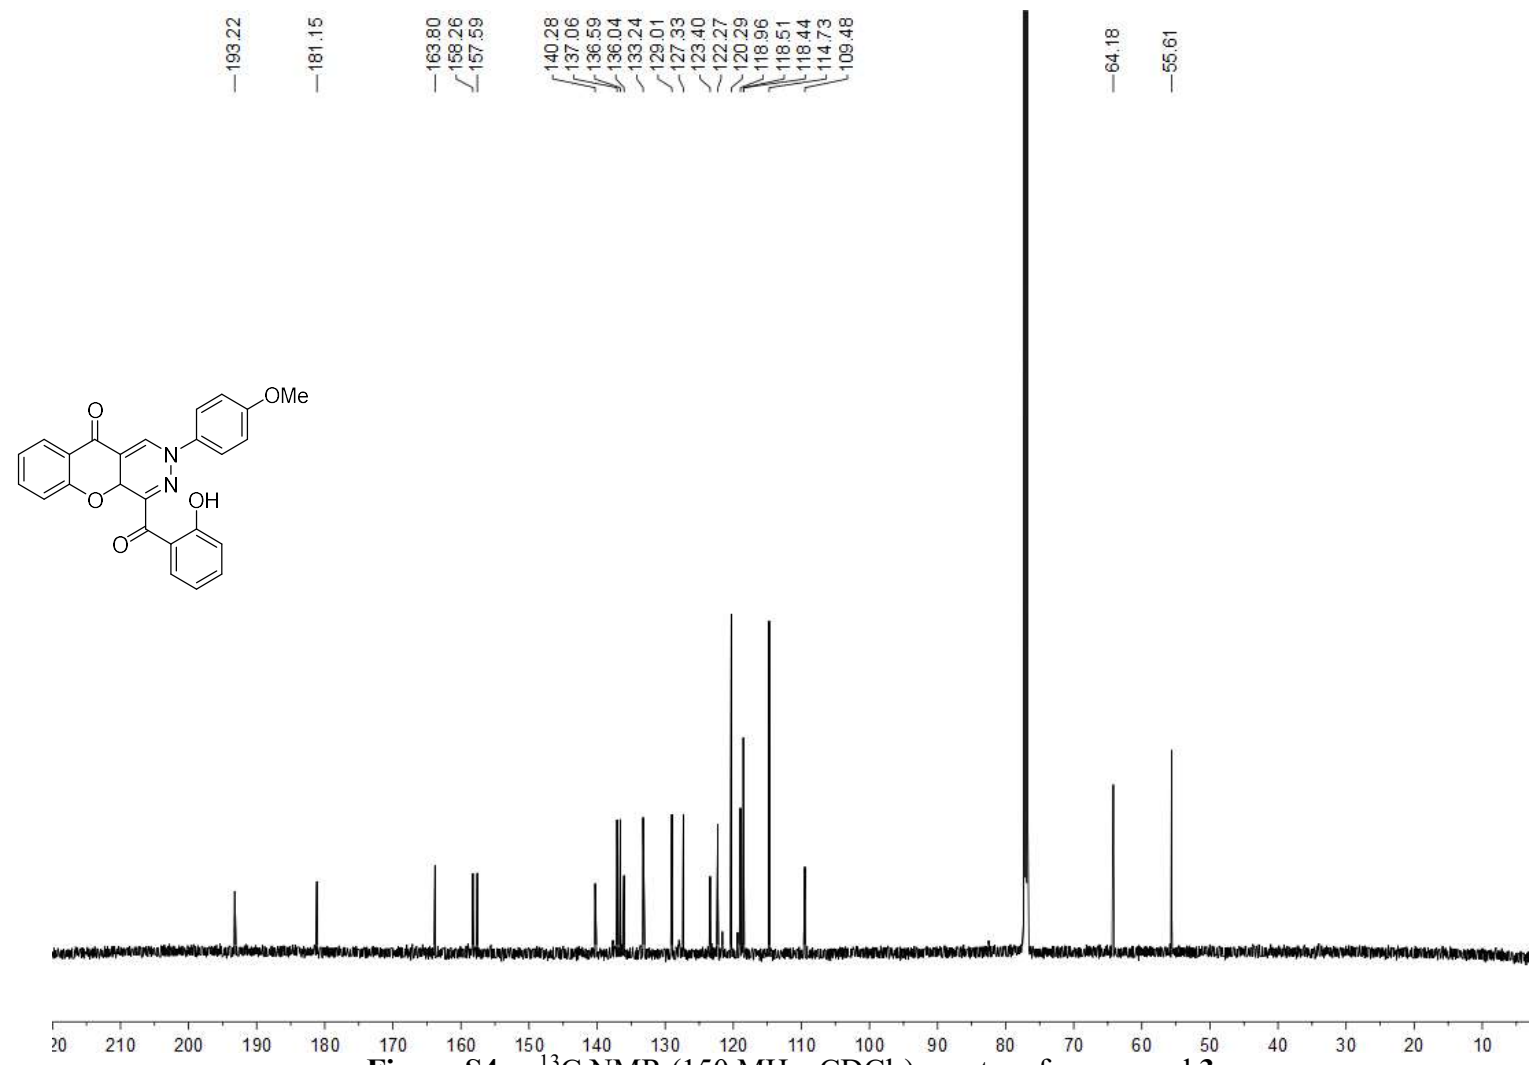

Figure S4. <sup>13</sup>C NMR (150 MHz, CDCl<sub>3</sub>) spectra of compound 3a

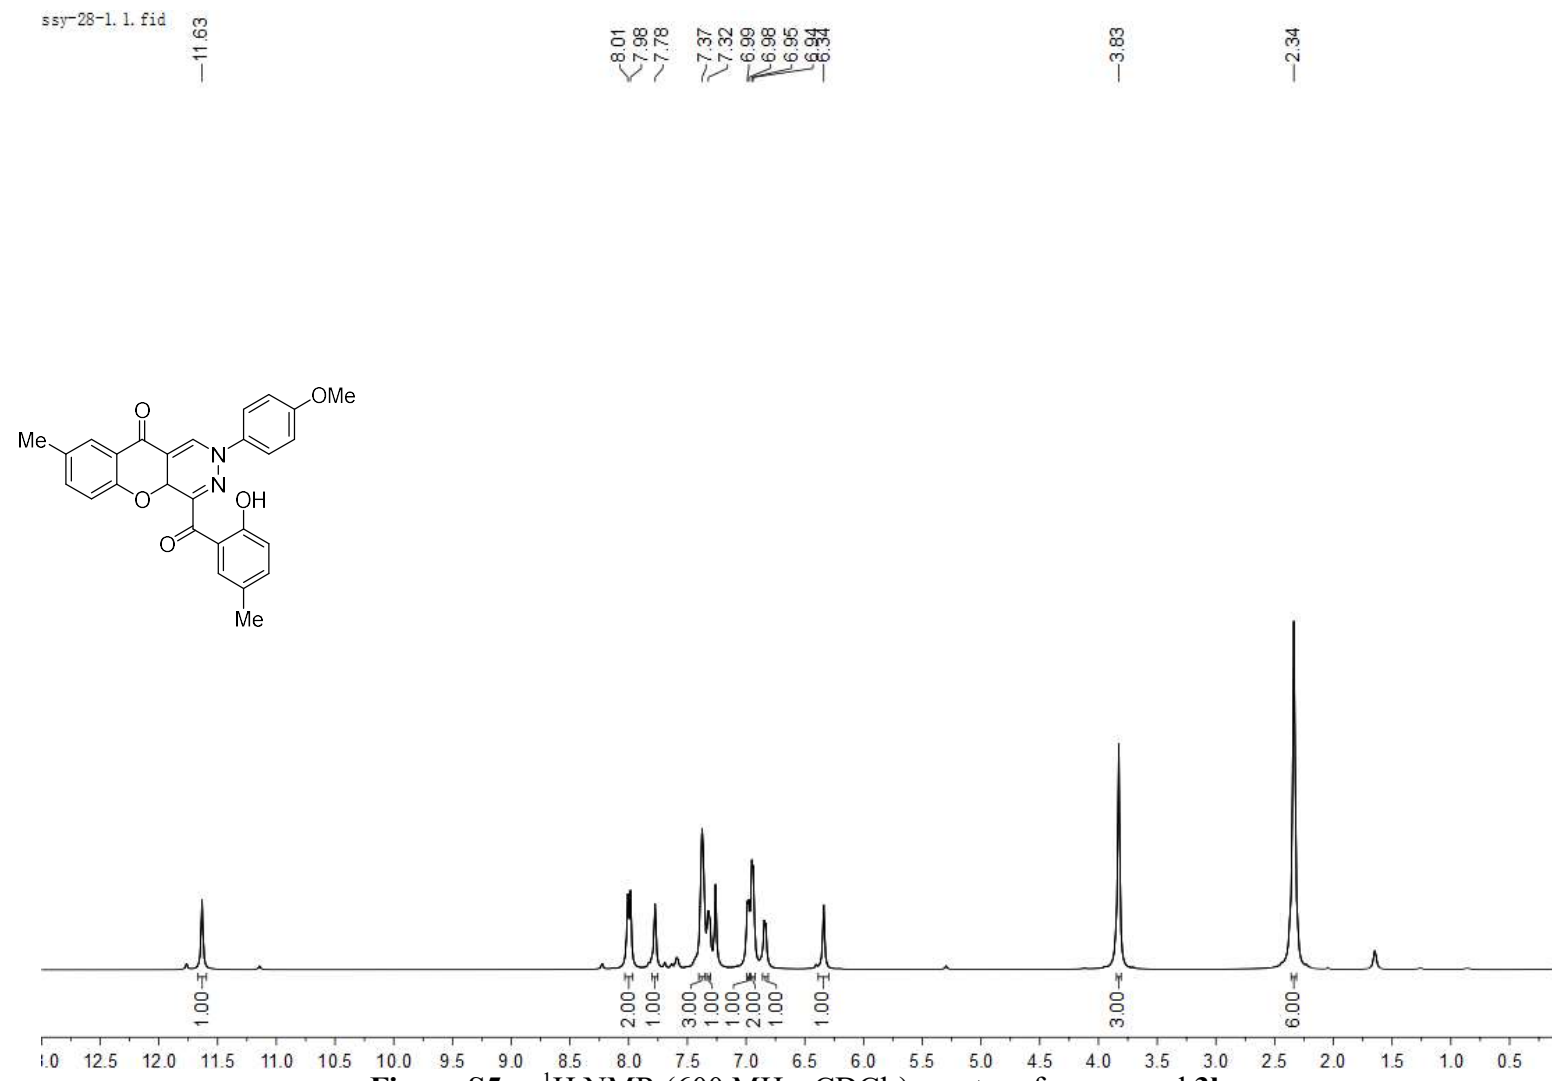

**Figure S5.**  $^1\text{H}$  NMR (600 MHz,  $\text{CDCl}_3$ ) spectra of compound **3b**

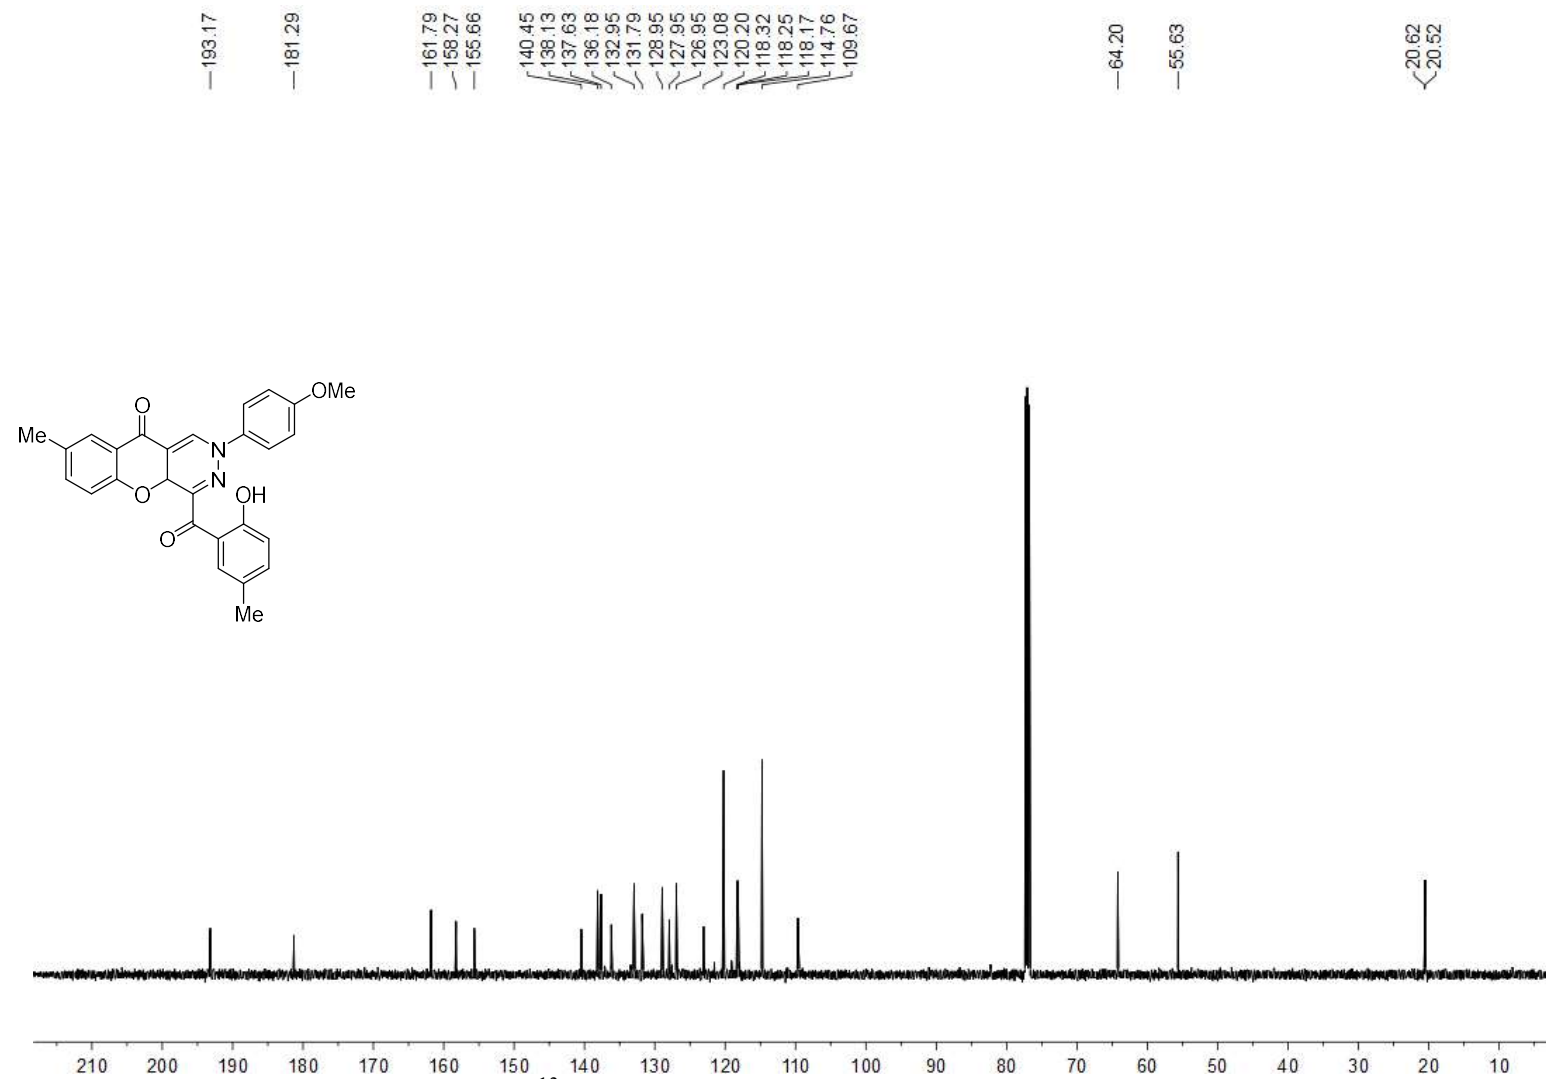

**Figure S6.**  $^{13}\text{C}$  NMR (125 MHz,  $\text{CDCl}_3$ ) spectra of compound **3b**

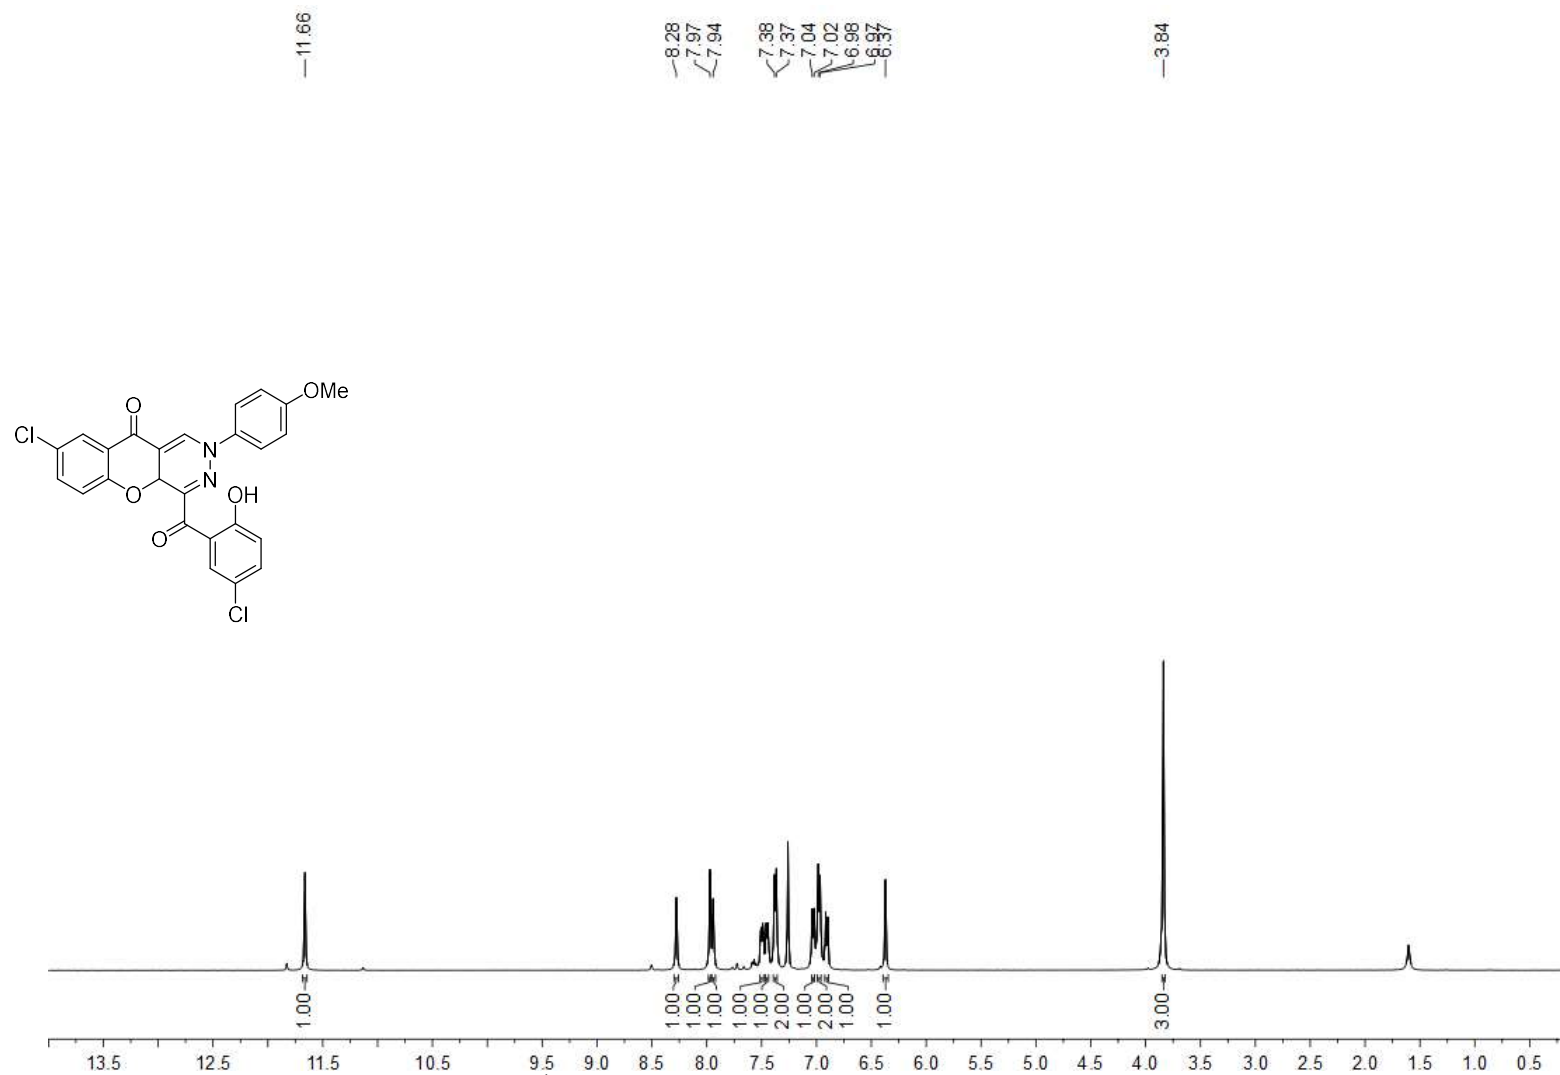

Figure S7. <sup>1</sup>H NMR (500 MHz, CDCl<sub>3</sub>) spectra of compound **3c**

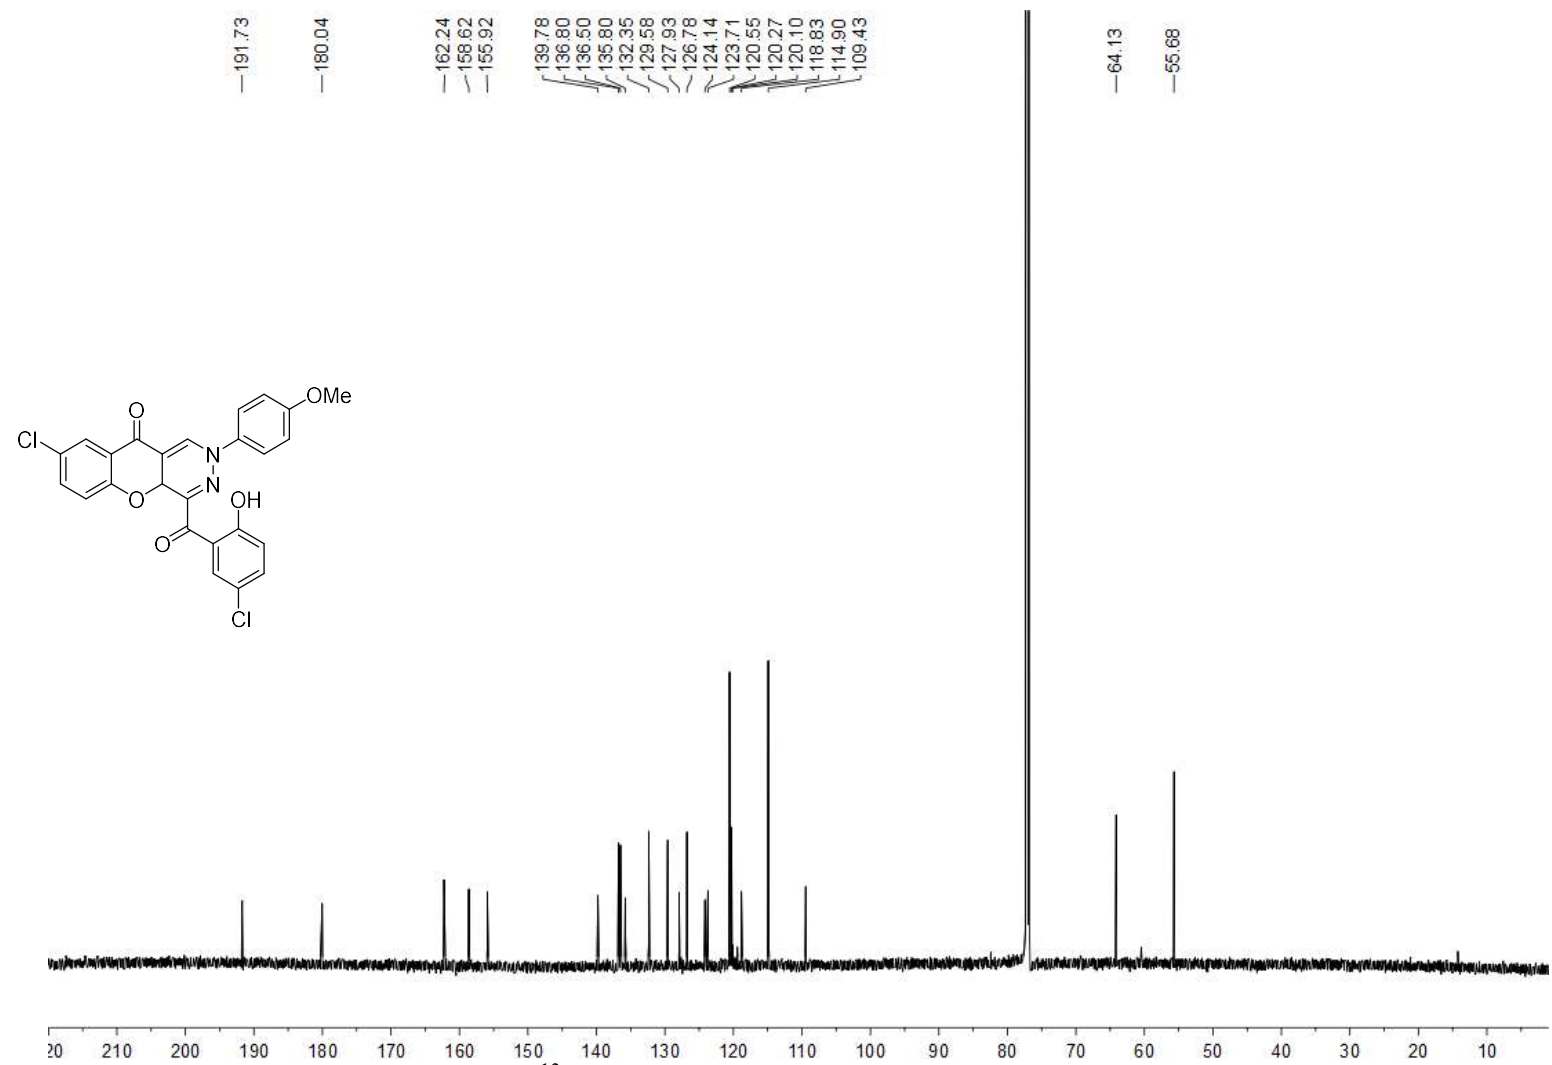

Figure S8. <sup>13</sup>C NMR (150 MHz, CDCl<sub>3</sub>) spectra of compound 3c



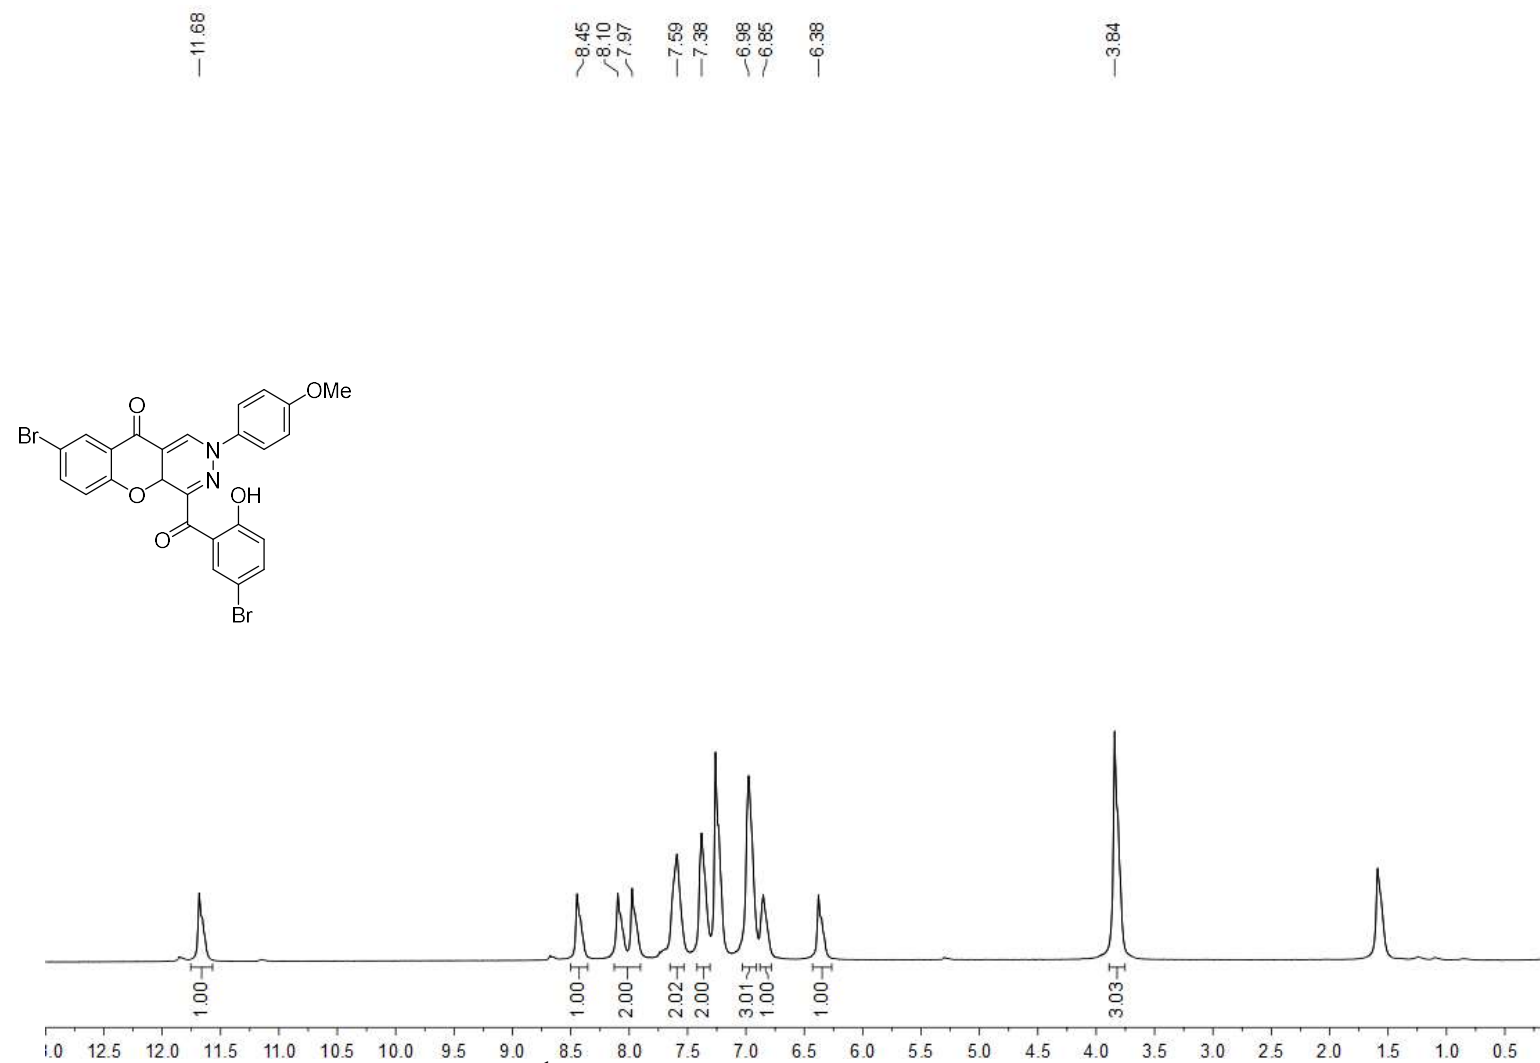

**Figure S9.** <sup>1</sup>H NMR (600 MHz, CDCl<sub>3</sub>) spectra of compound **3d**

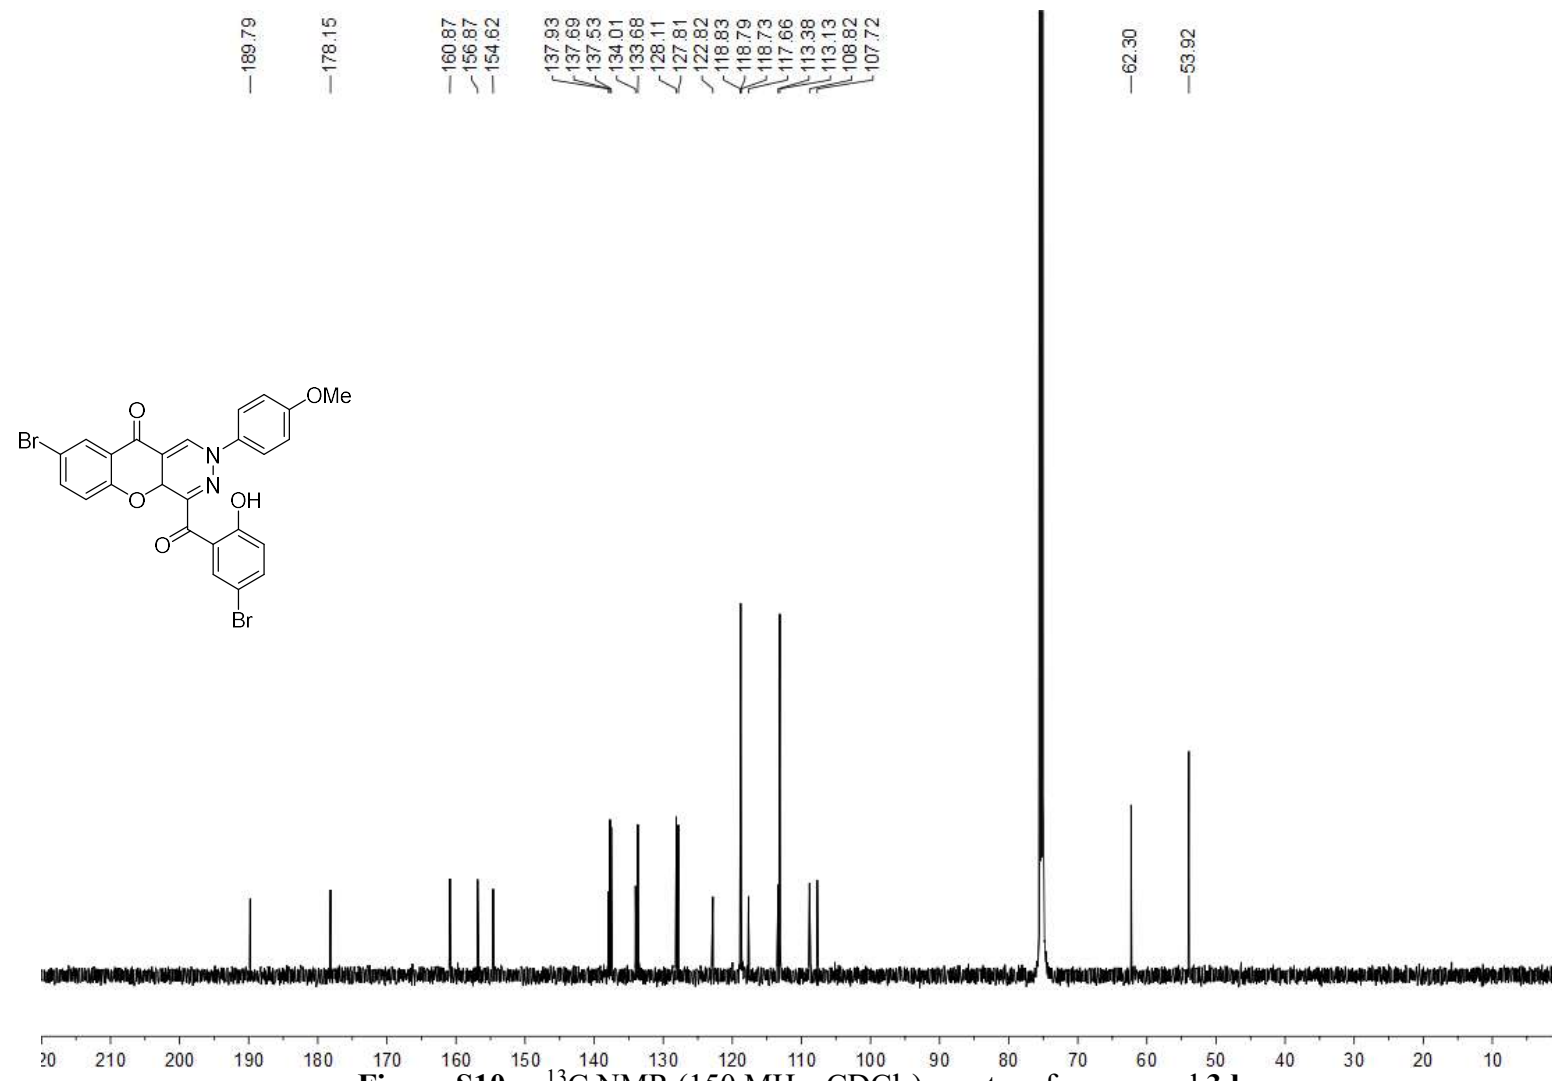

Figure S10. <sup>13</sup>C NMR (150 MHz, CDCl<sub>3</sub>) spectra of compound 3d

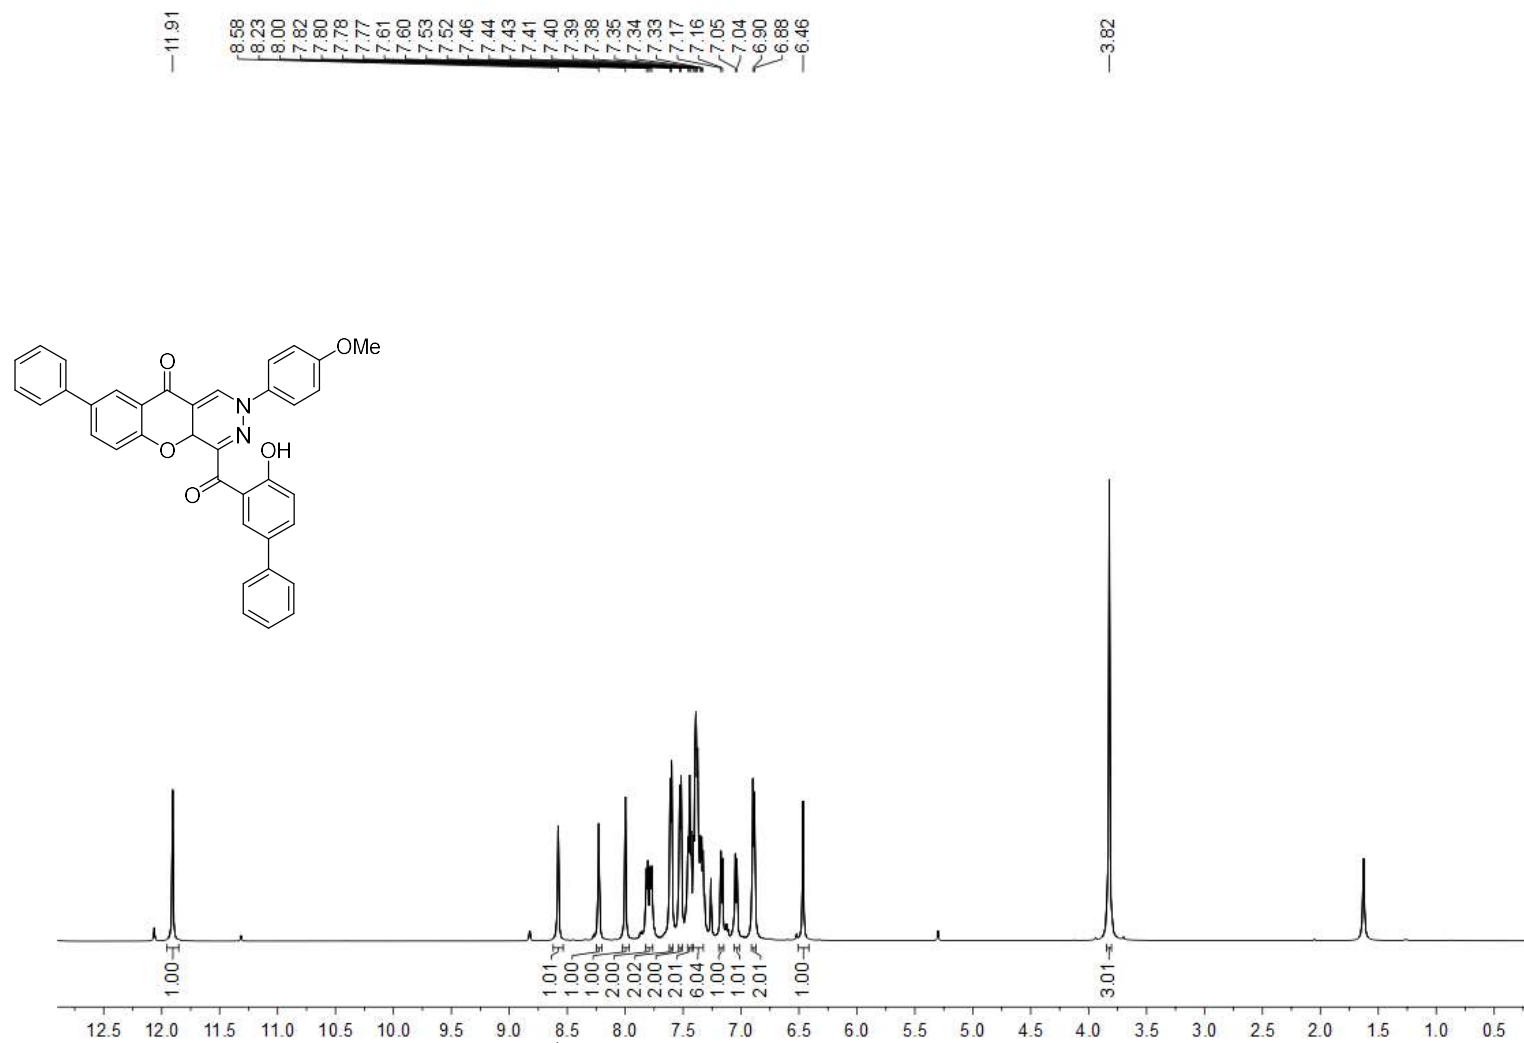

Figure S11. <sup>1</sup>H NMR (600 MHz, CDCl<sub>3</sub>) spectra of compound 3e

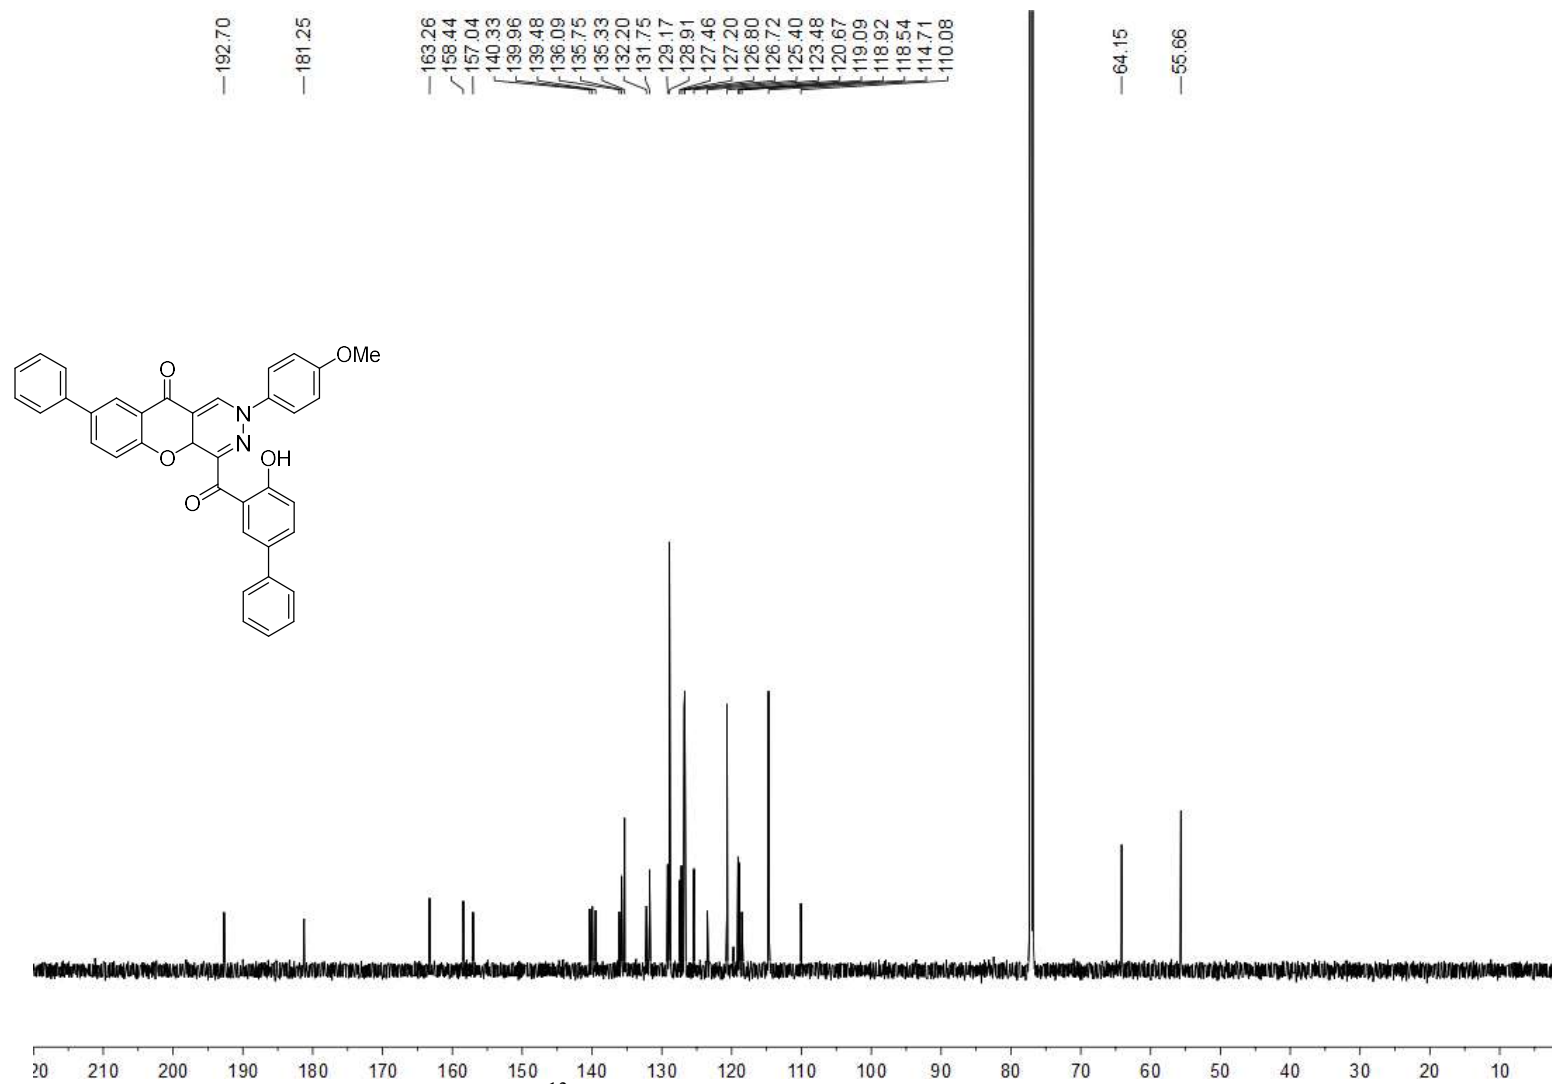

Figure S12. <sup>13</sup>C NMR (150 MHz, CDCl<sub>3</sub>) spectra of compound 3e

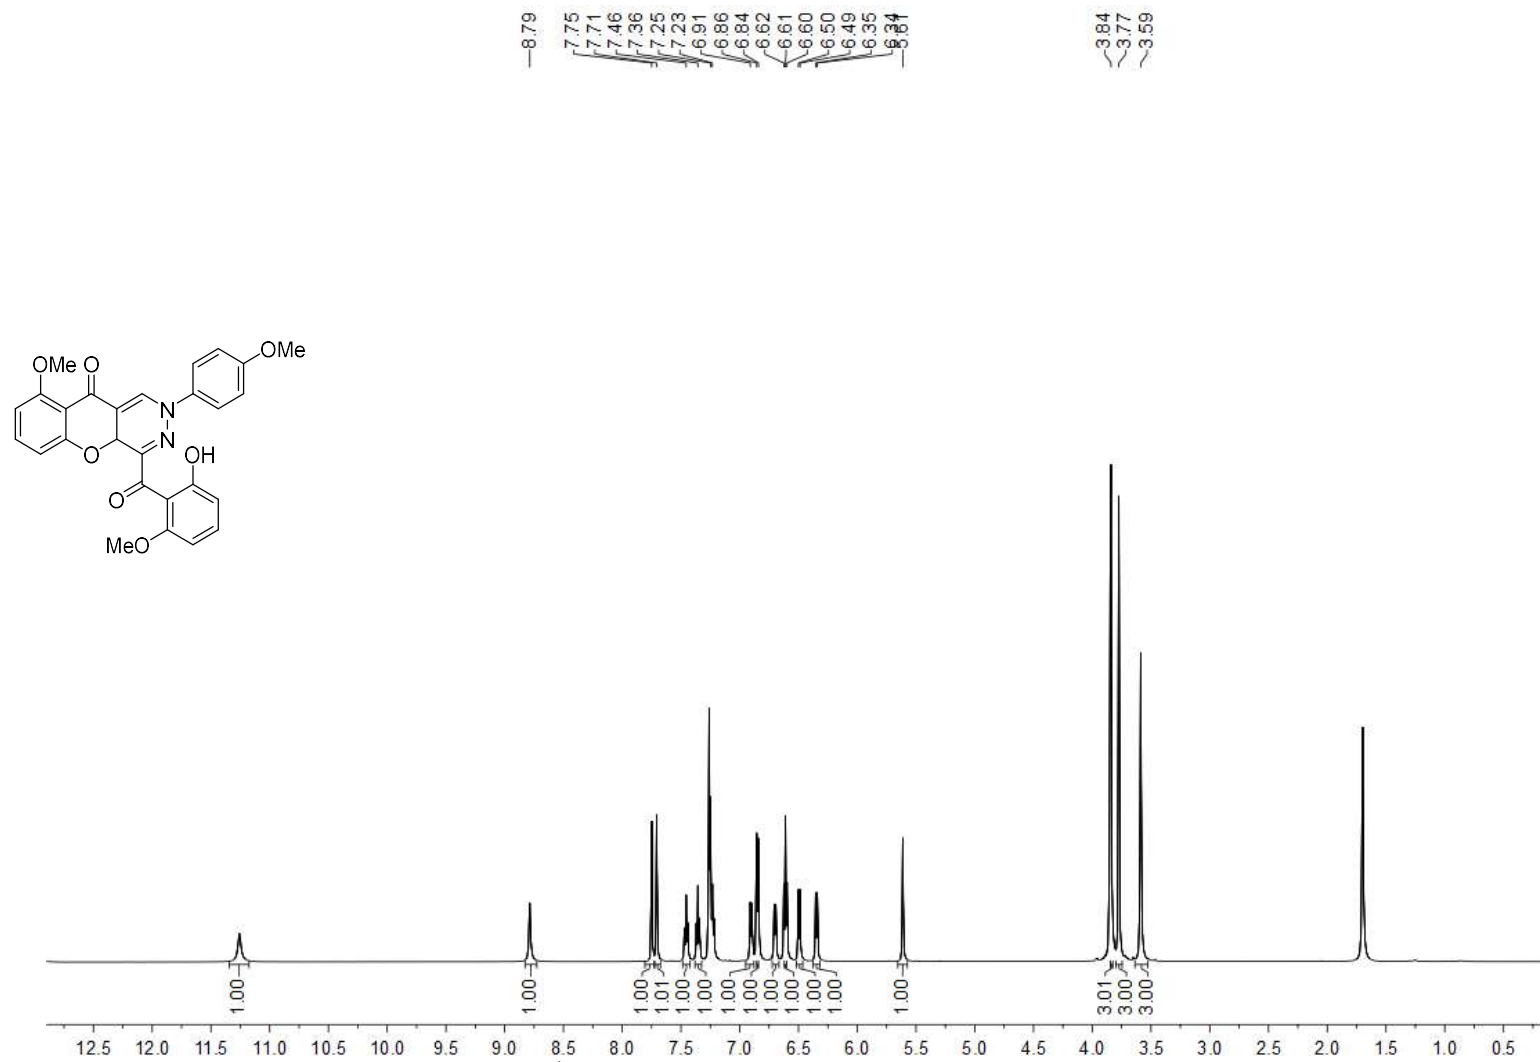

**Figure S13.**  $^1\text{H NMR}$  (600 MHz,  $\text{CDCl}_3$ ) spectra of compound **3f**

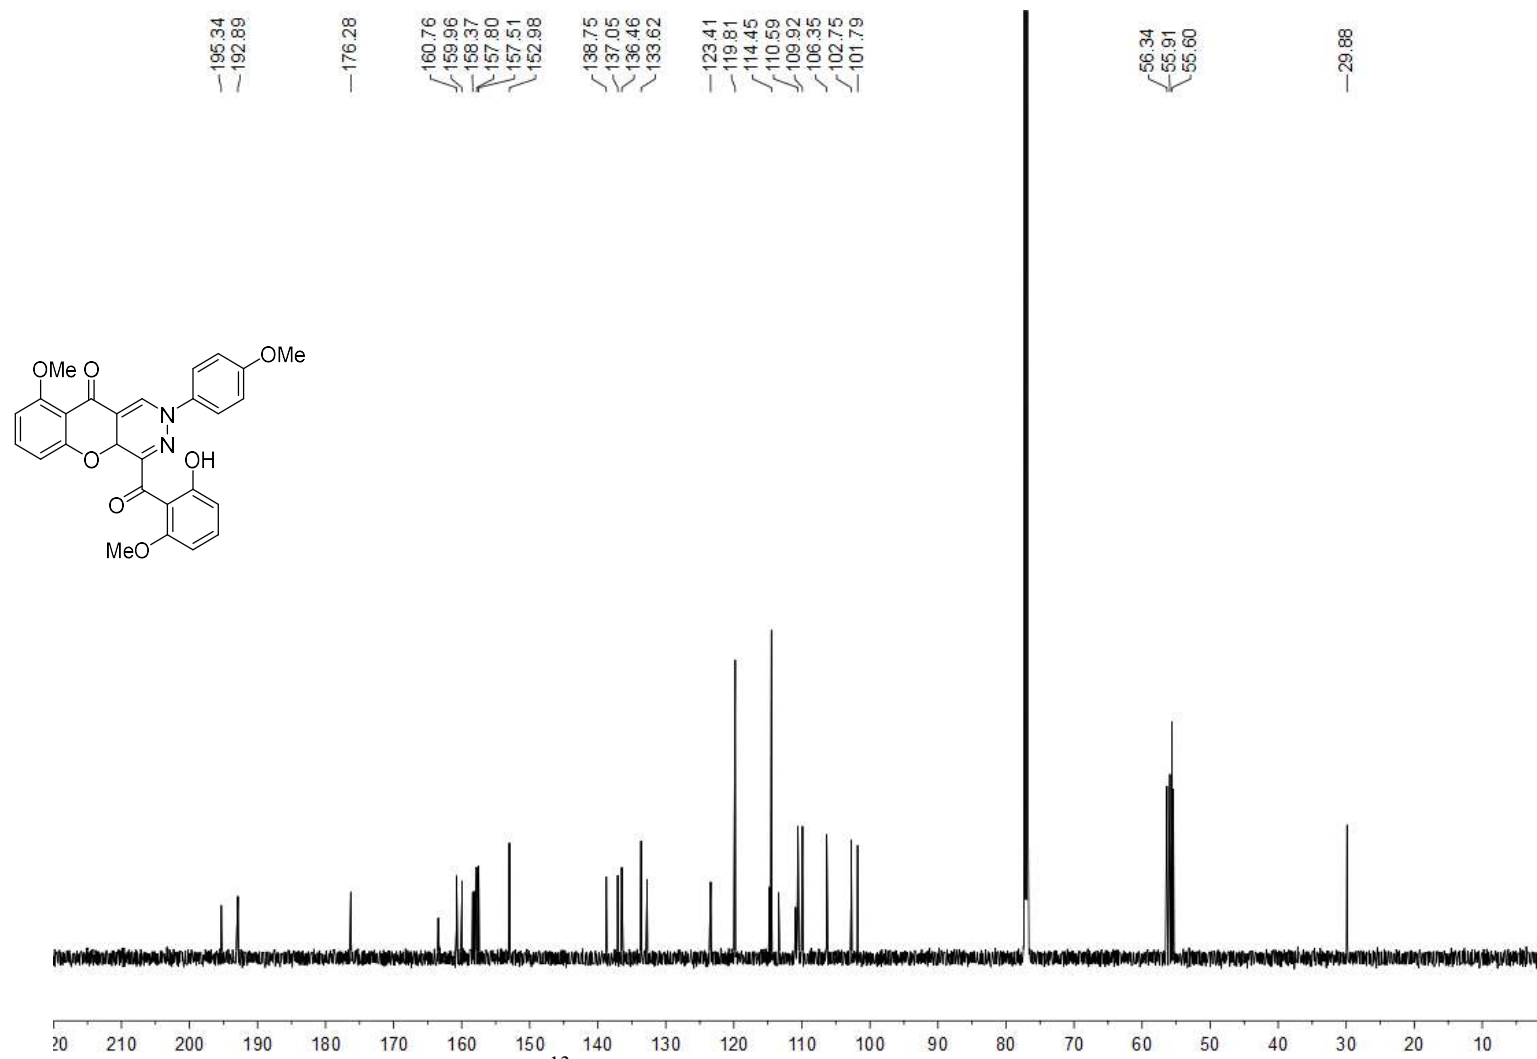

Figure S14. <sup>13</sup>C NMR (150 MHz, CDCl<sub>3</sub>) spectra of compound 3f

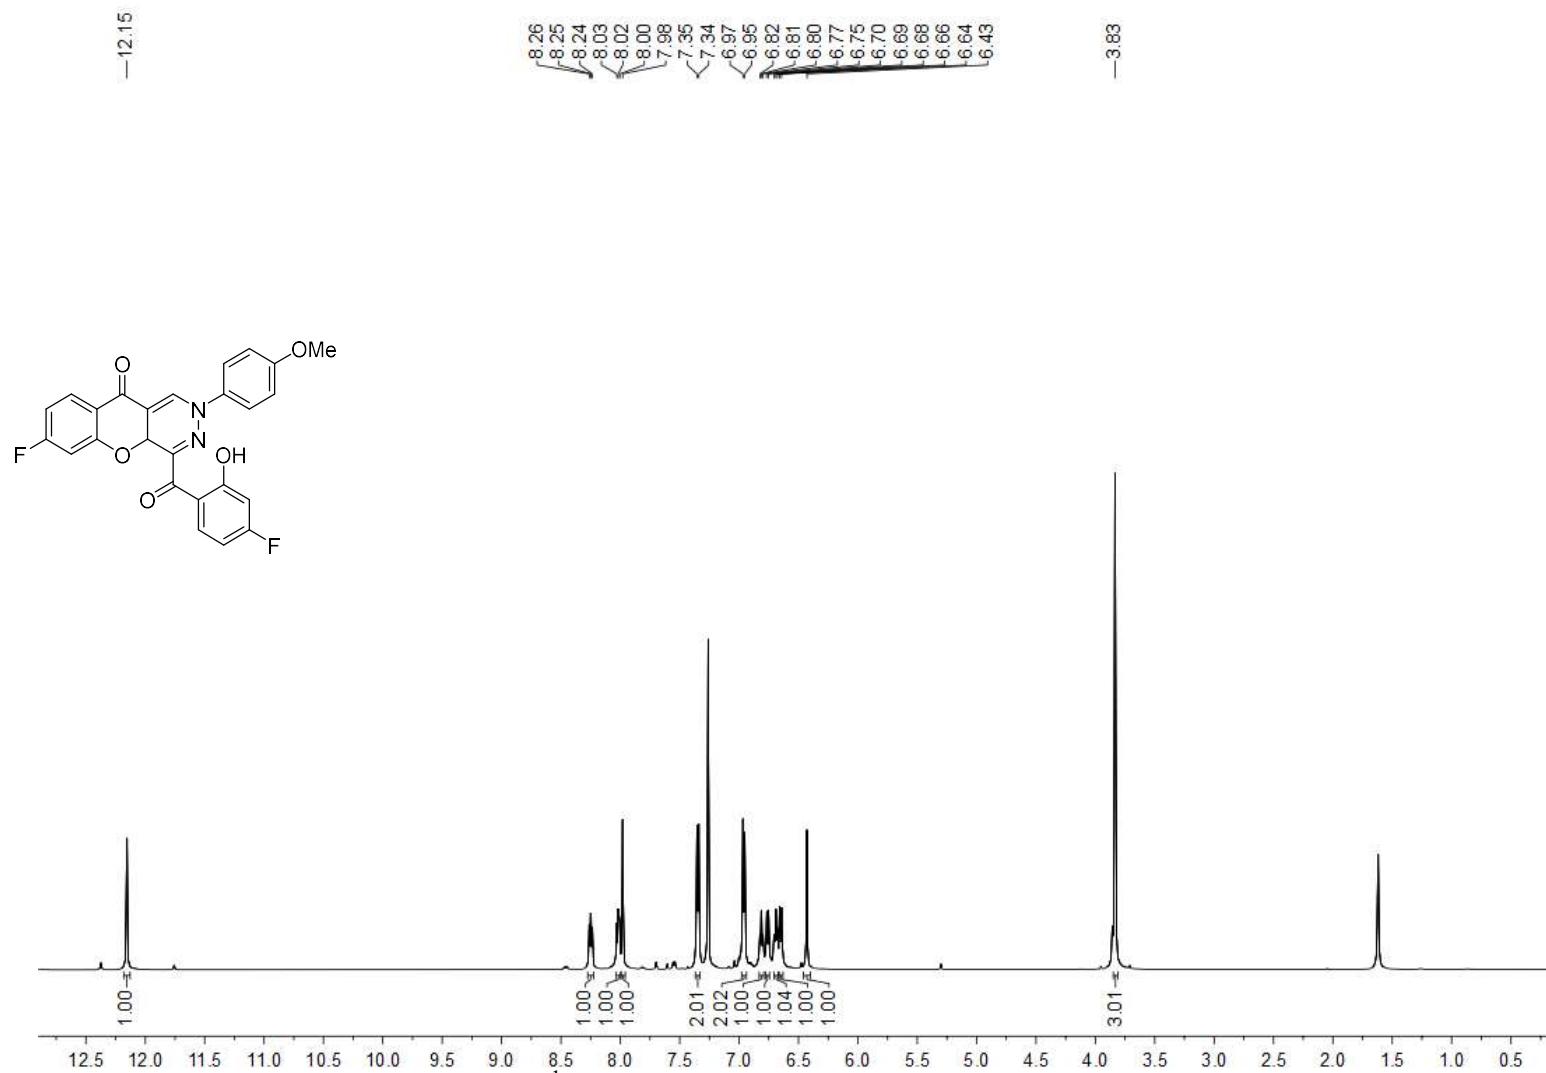

**Figure S15.**  $^1\text{H NMR}$  (600 MHz,  $\text{CDCl}_3$ ) spectra of compound **3g**

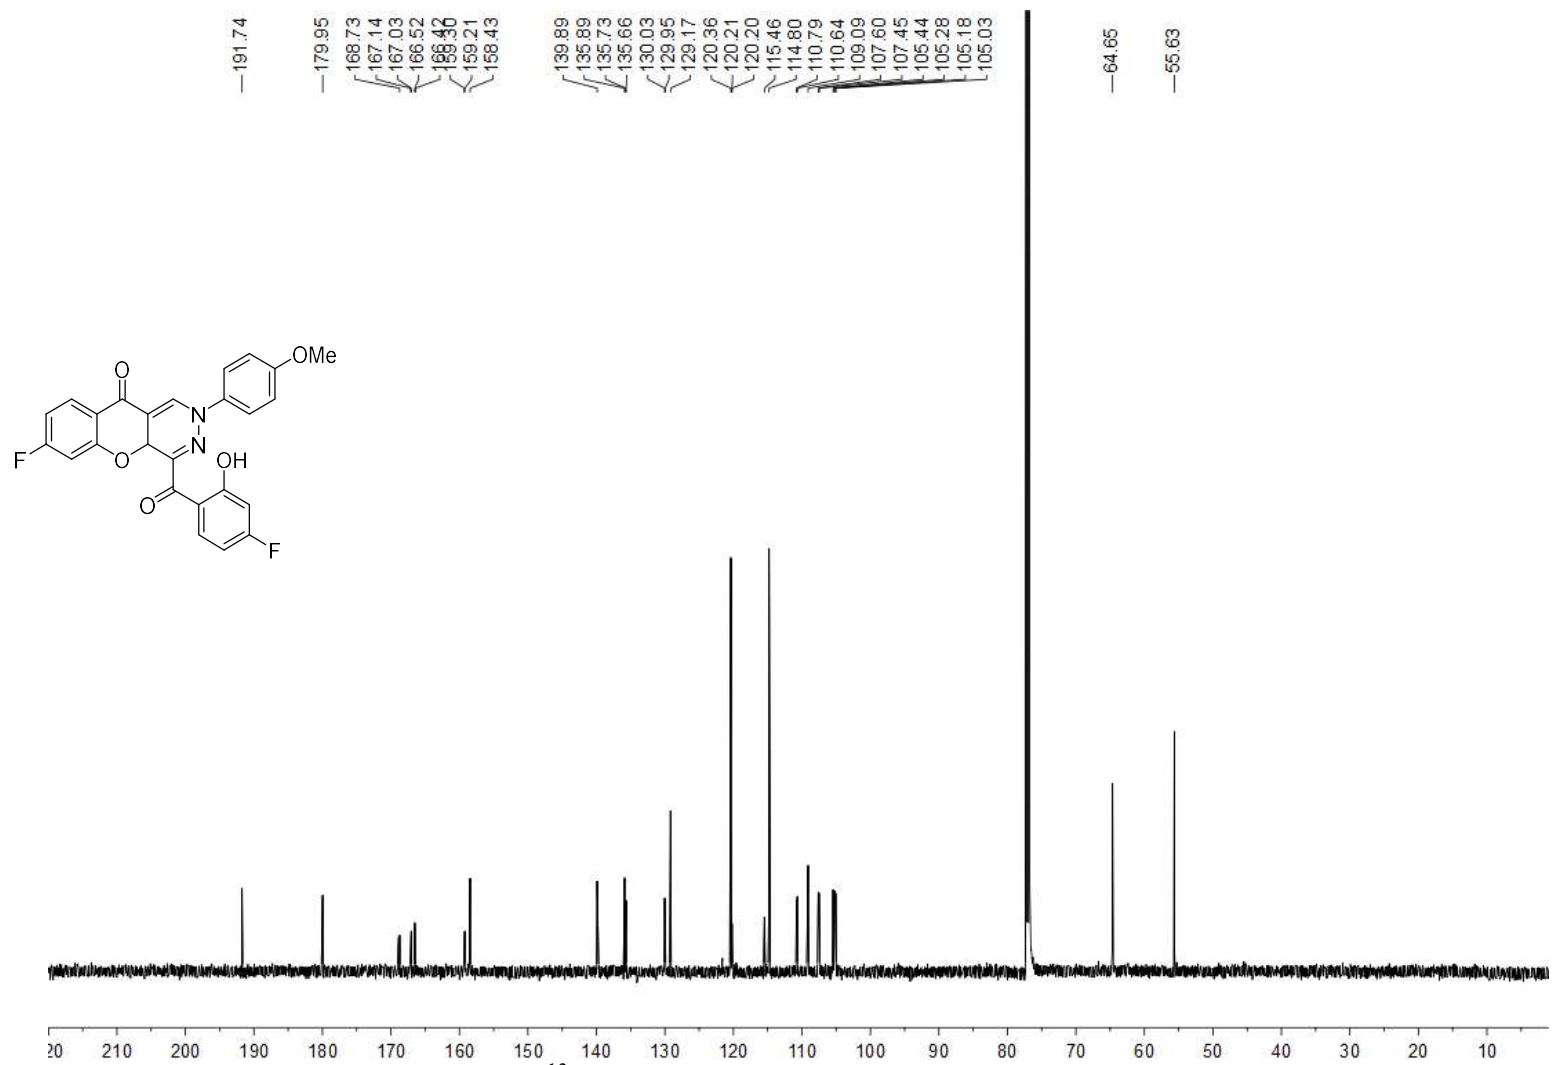

Figure S16. <sup>13</sup>C NMR (150 MHz, CDCl<sub>3</sub>) spectra of compound 3g



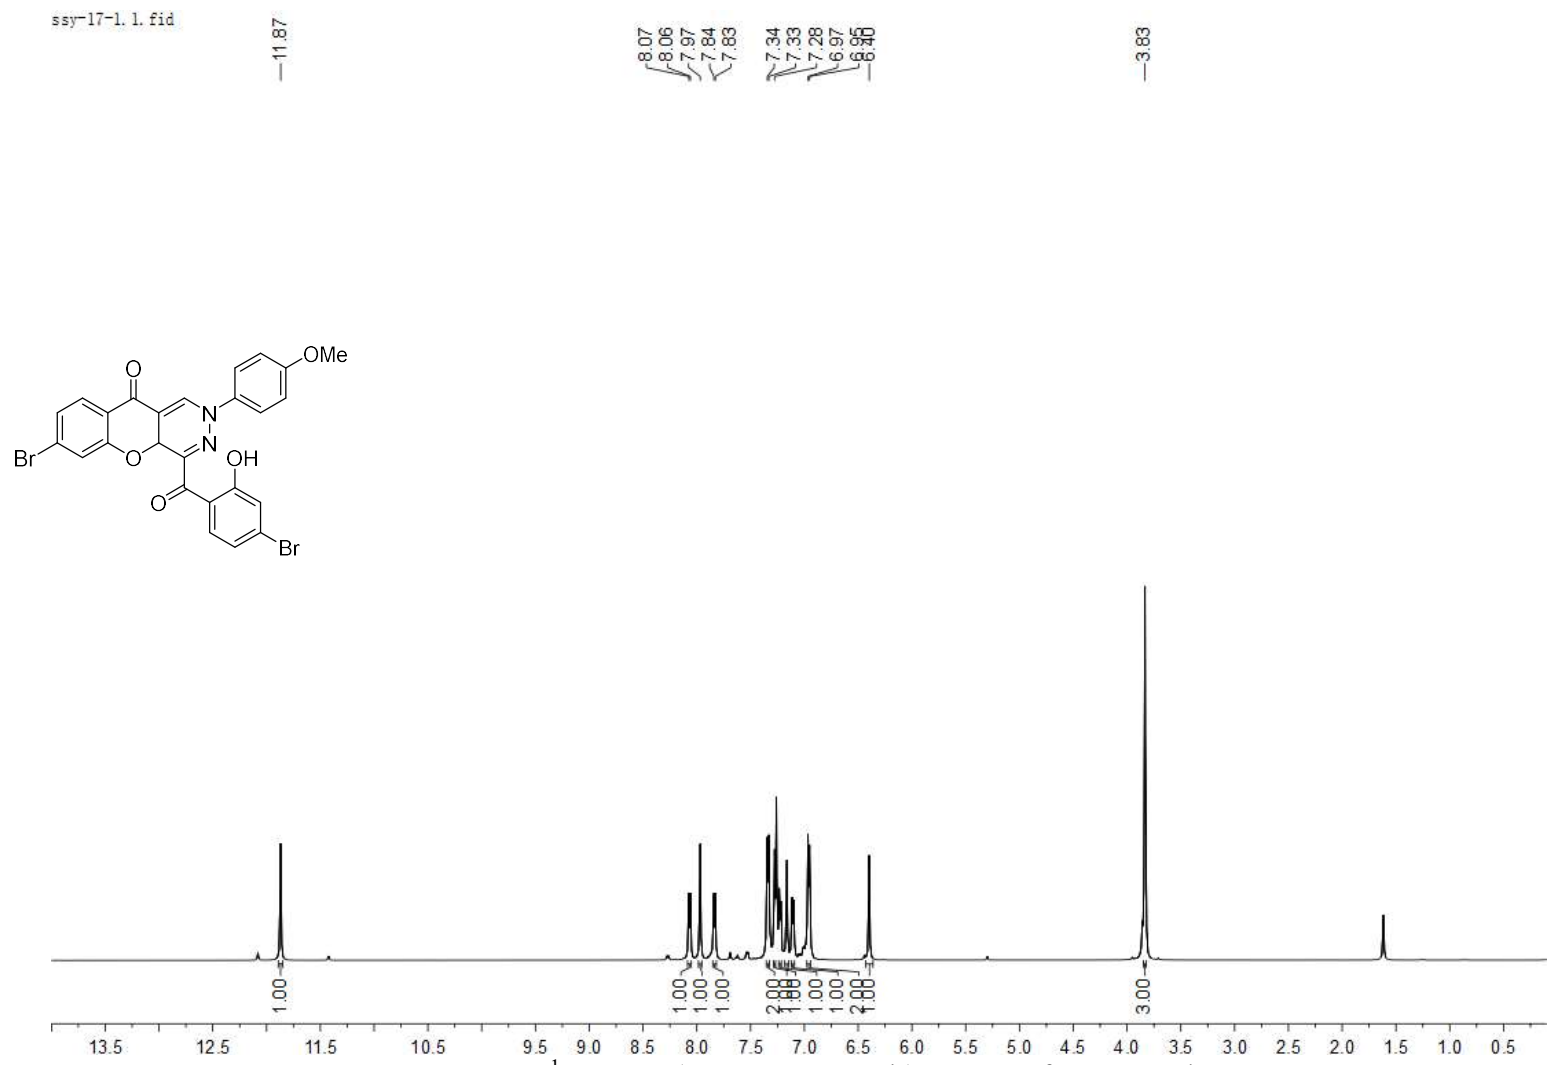

Figure S17. <sup>1</sup>H NMR (600 MHz, CDCl<sub>3</sub>) spectra of compound **3h**

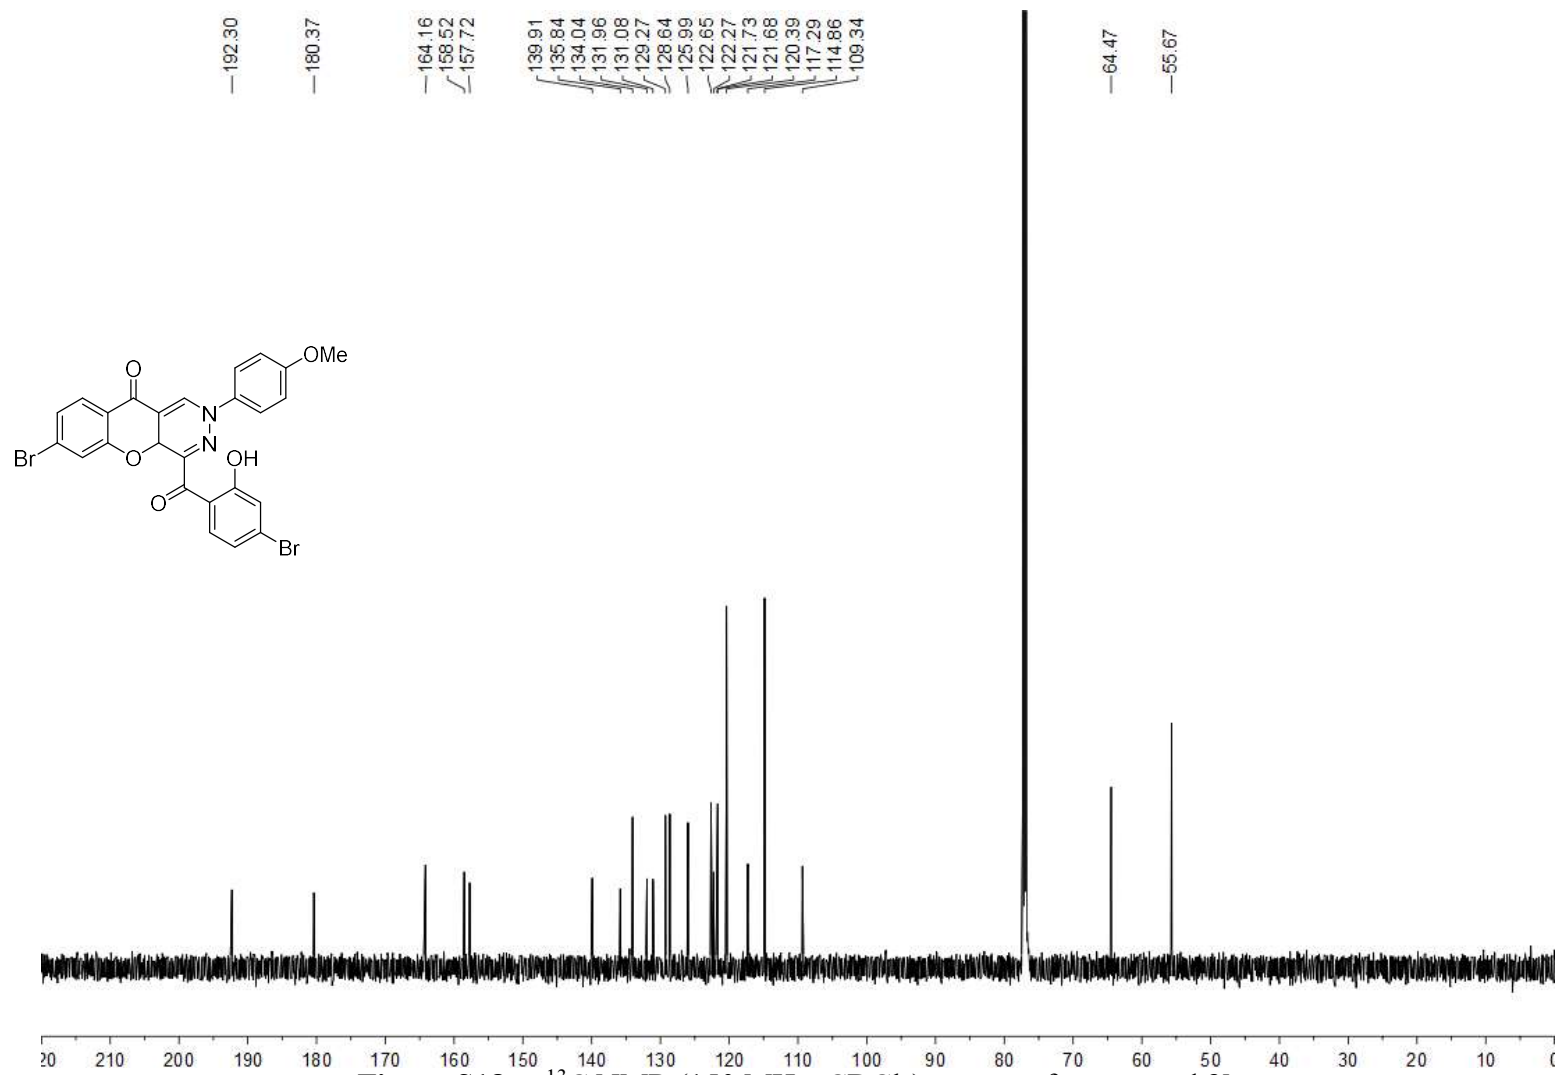

Figure S18. <sup>13</sup>C NMR (150 MHz, CDCl<sub>3</sub>) spectra of compound 3h

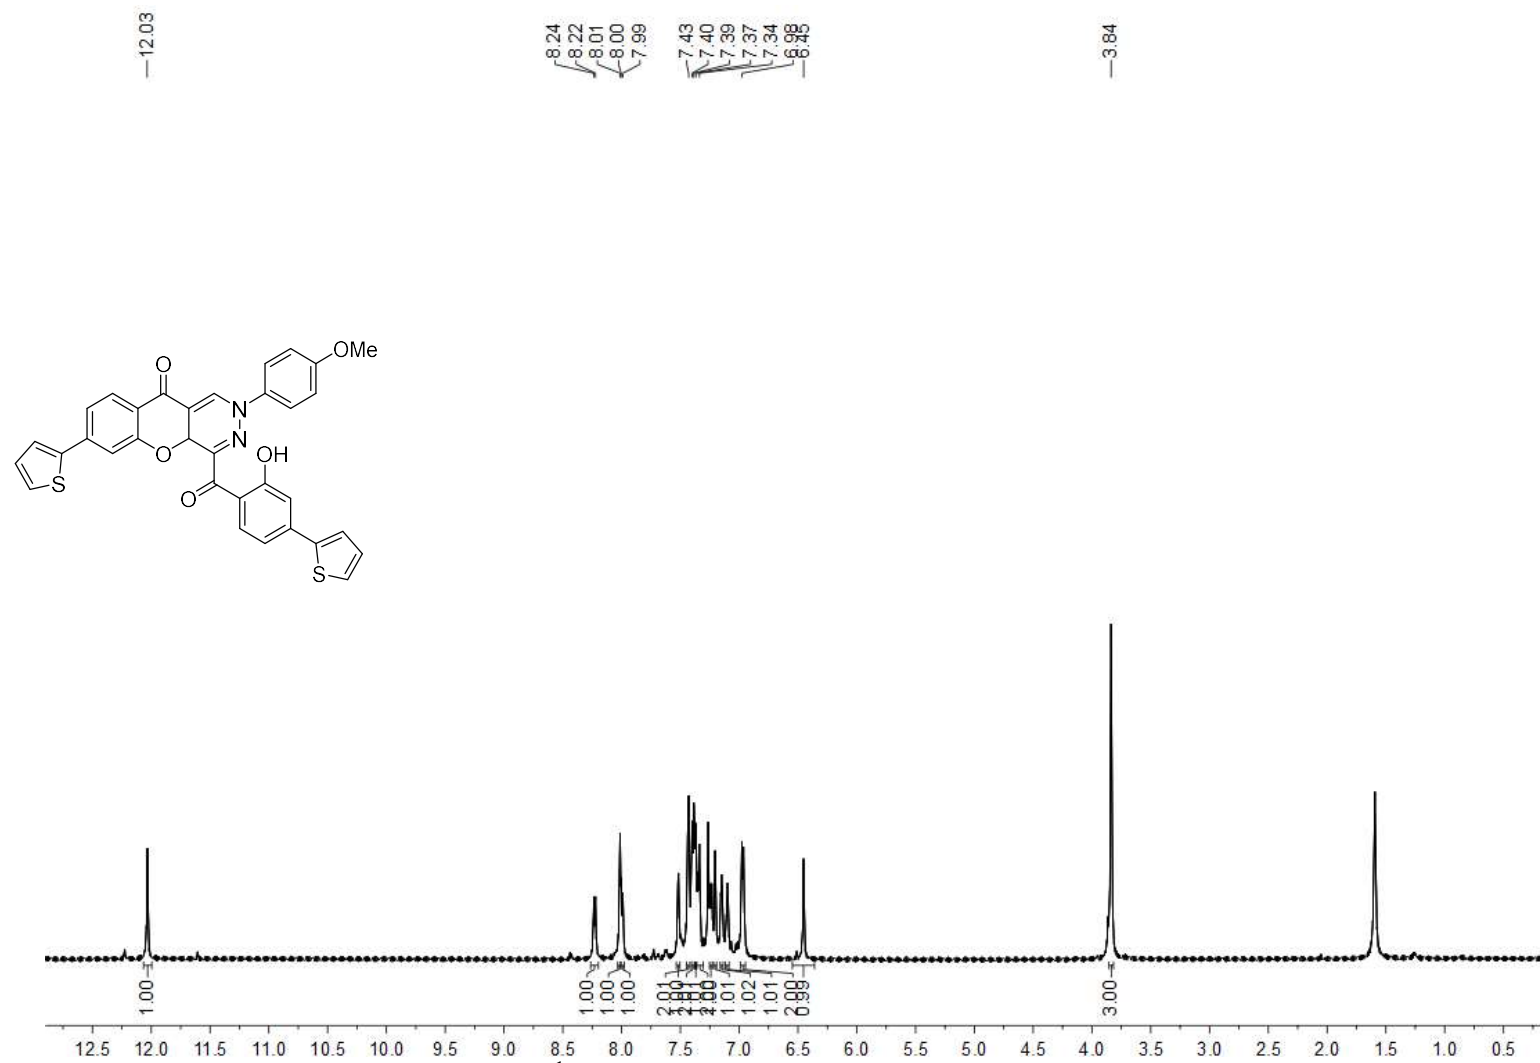

**Figure S19.** <sup>1</sup>H NMR (600 MHz, CDCl<sub>3</sub>) spectra of compound **3i**

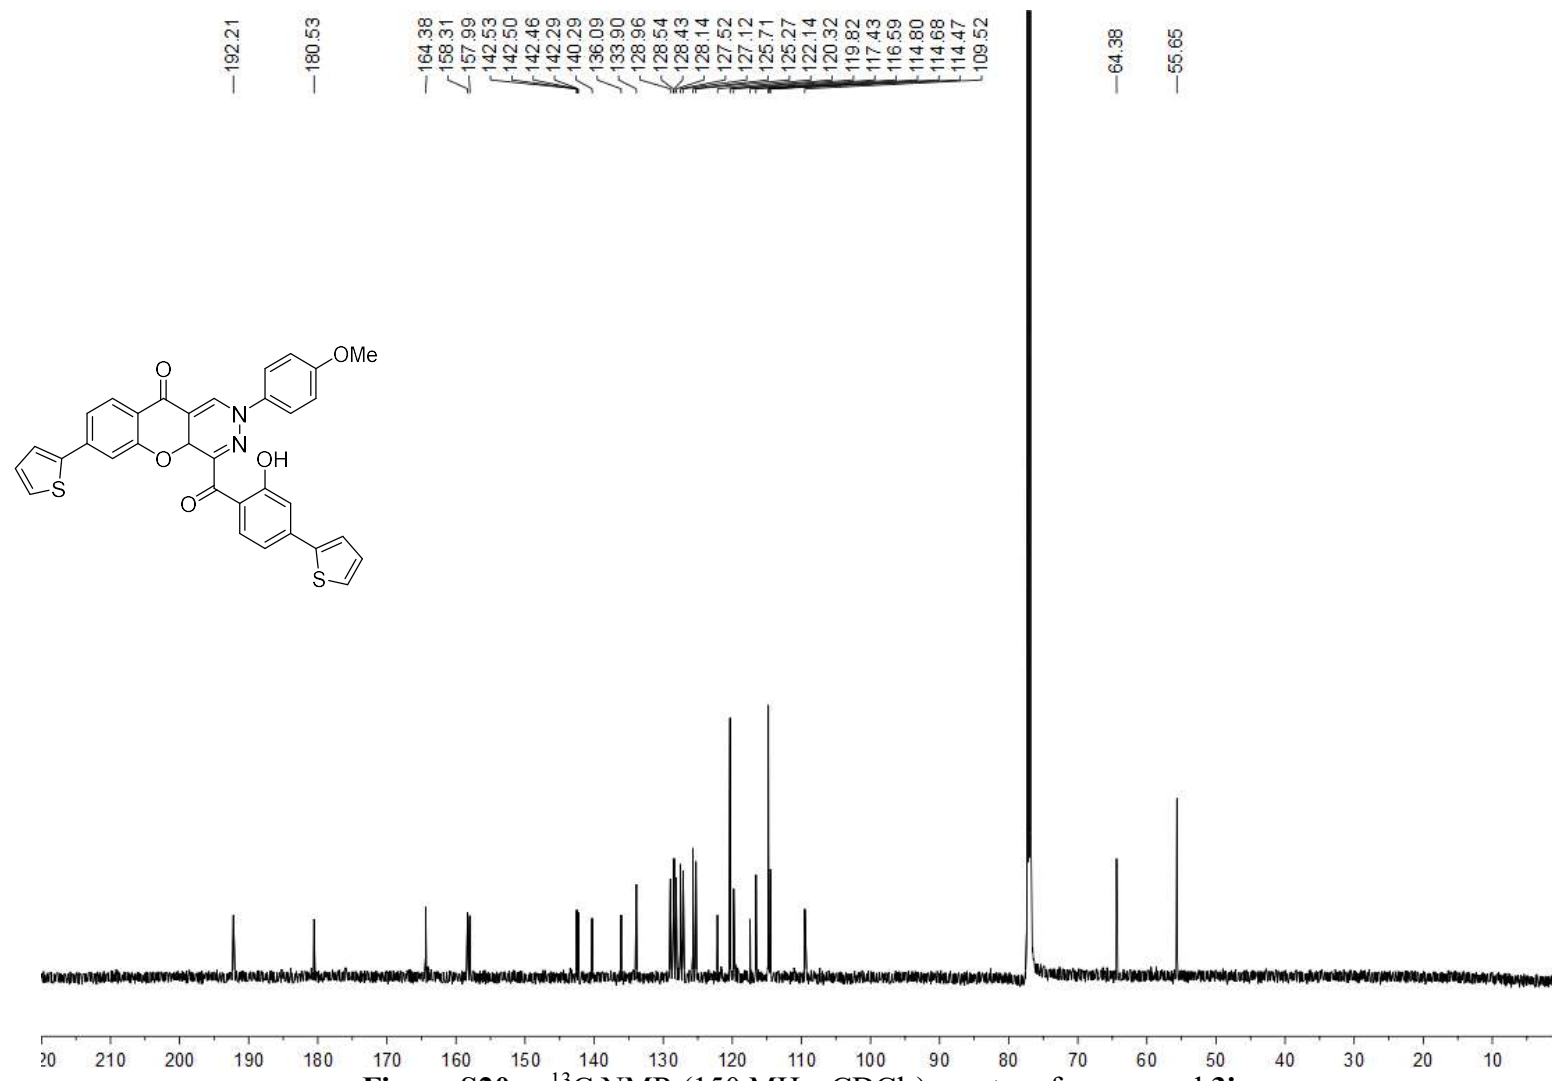

**Figure S20.** <sup>13</sup>C NMR (150 MHz, CDCl<sub>3</sub>) spectra of compound **3i**

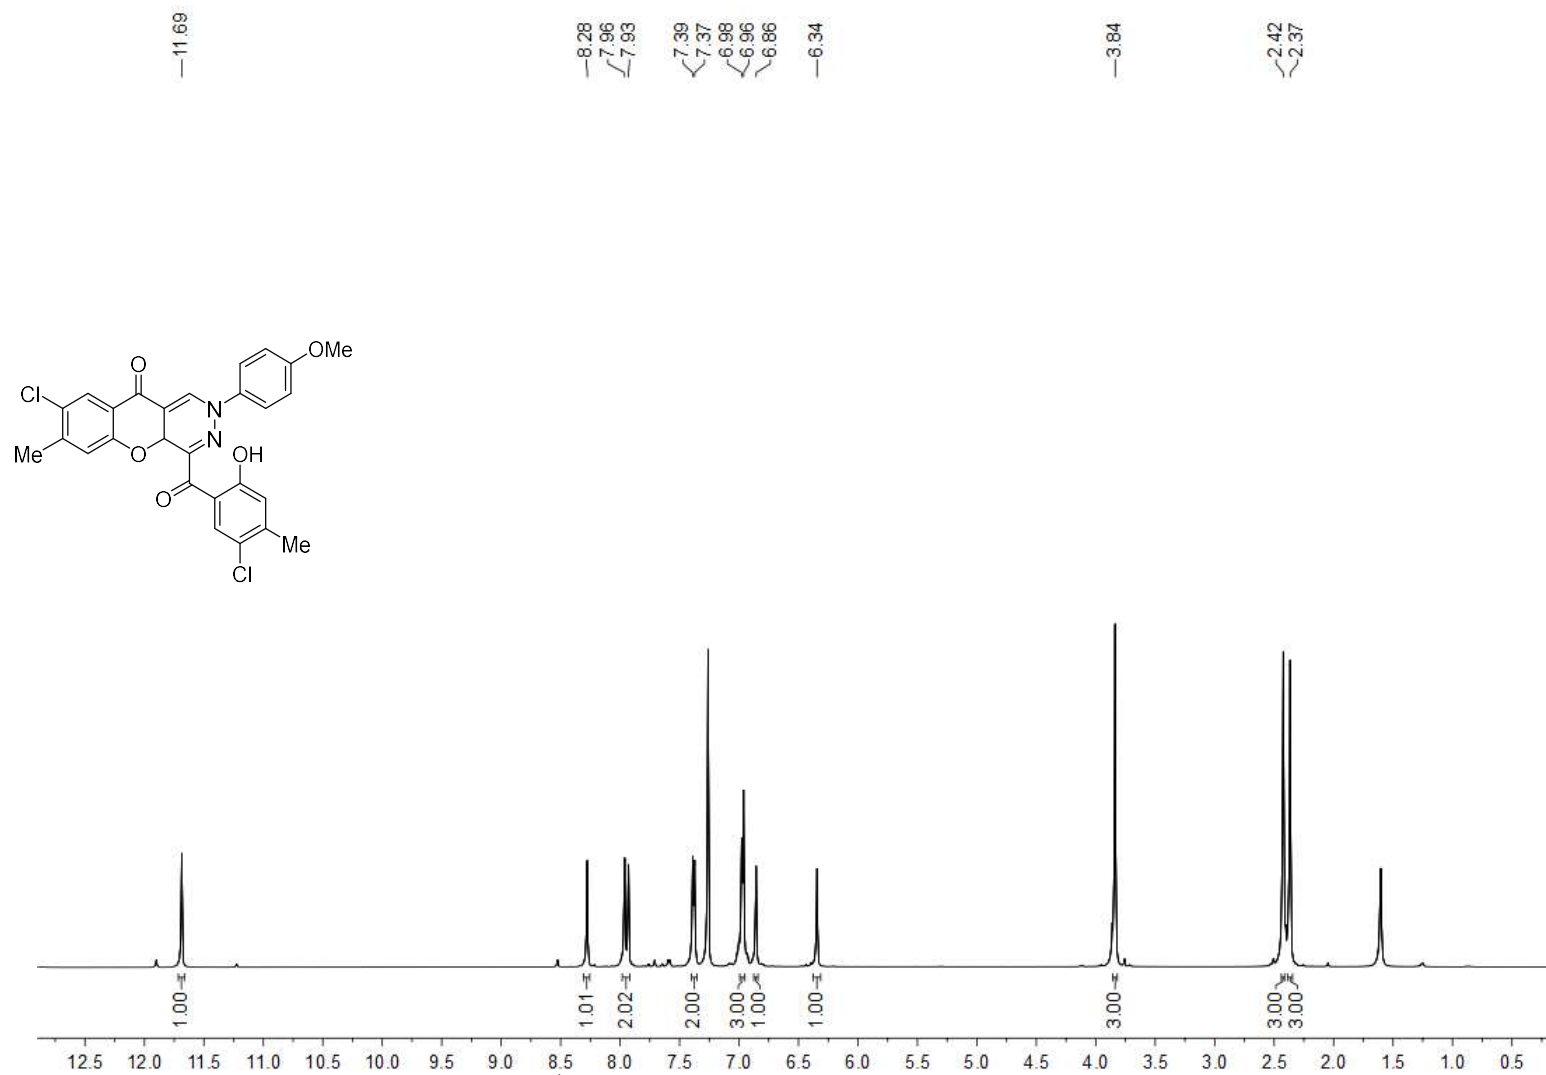

**Figure S21.**  $^1\text{H NMR}$  (600 MHz,  $\text{CDCl}_3$ ) spectra of compound **3j**

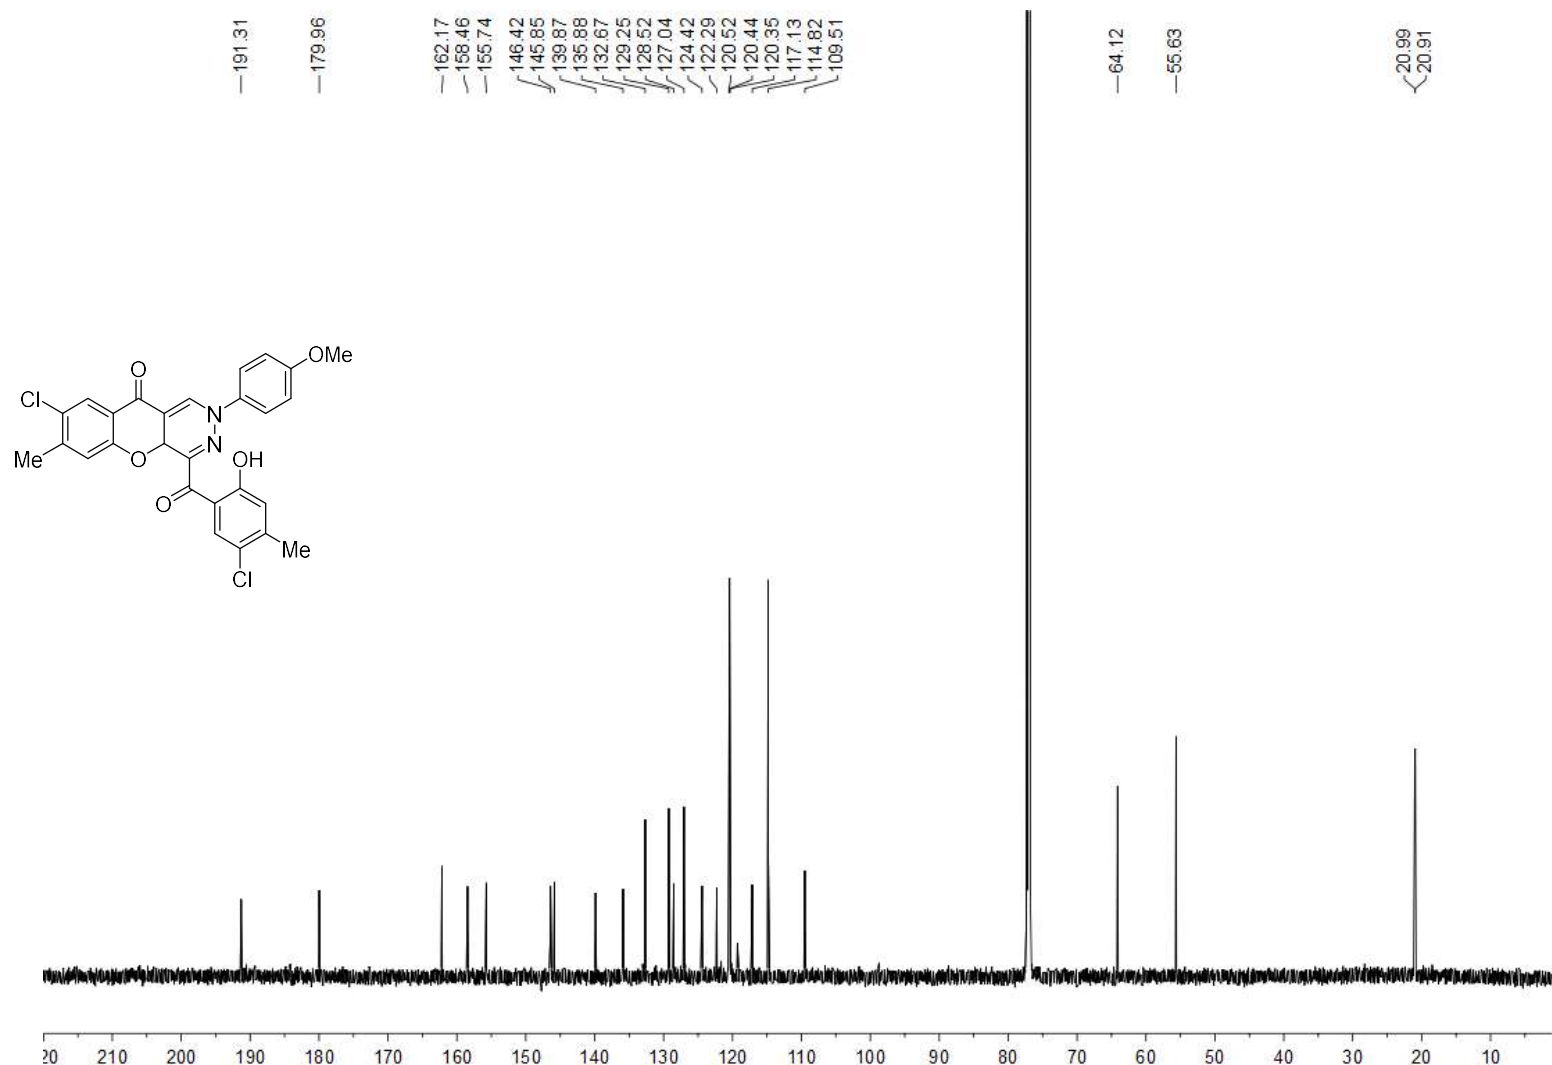

Figure S22. <sup>13</sup>C NMR (150 MHz, CDCl<sub>3</sub>) spectra of compound 3j

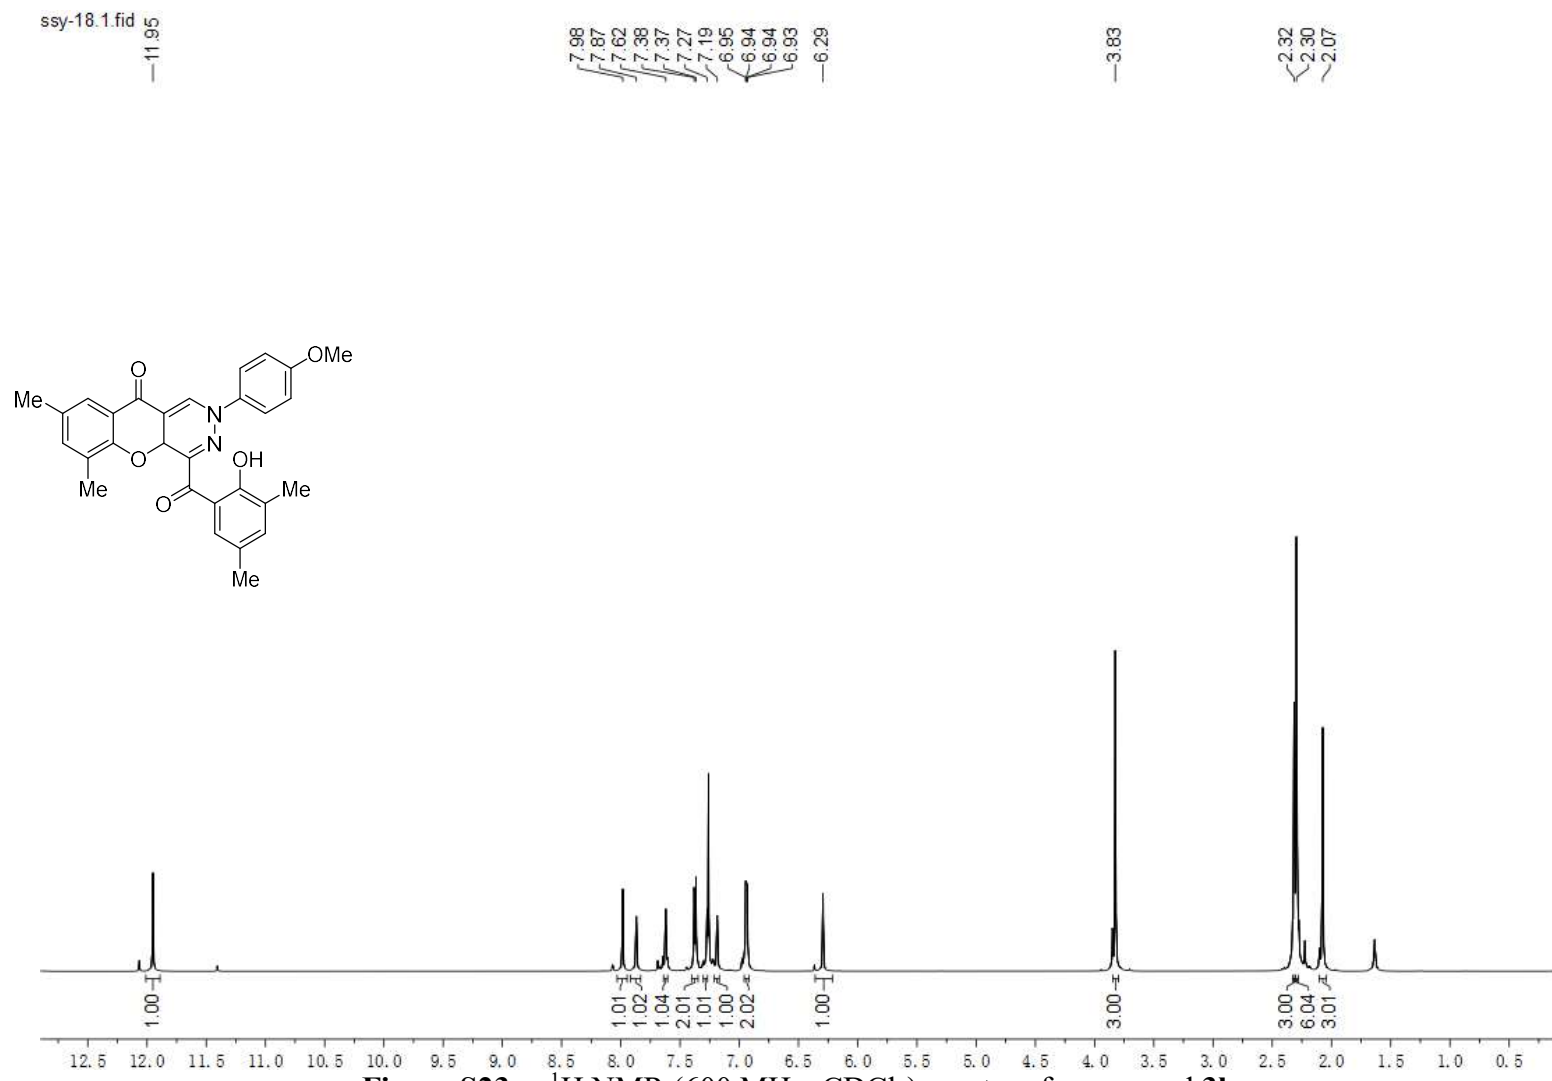

**Figure S23.**  $^1\text{H}$  NMR (600 MHz,  $\text{CDCl}_3$ ) spectra of compound **3k**

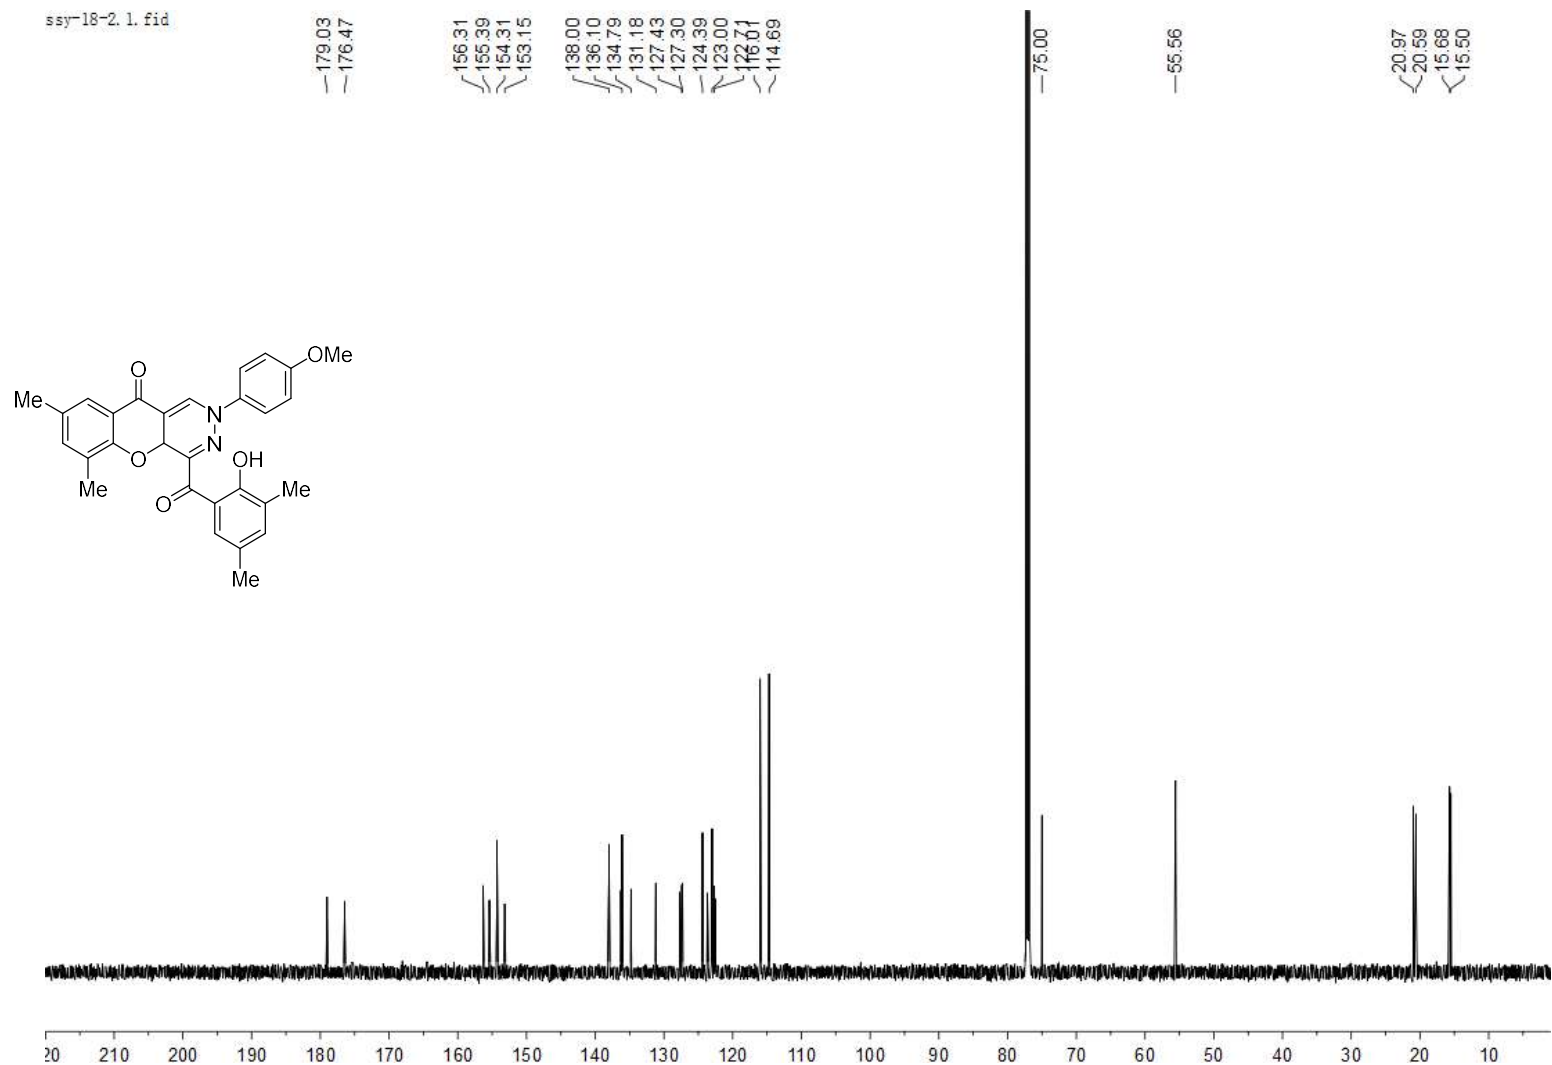

Figure S24. <sup>13</sup>C NMR (150 MHz, CDCl<sub>3</sub>) spectra of compound **3k**



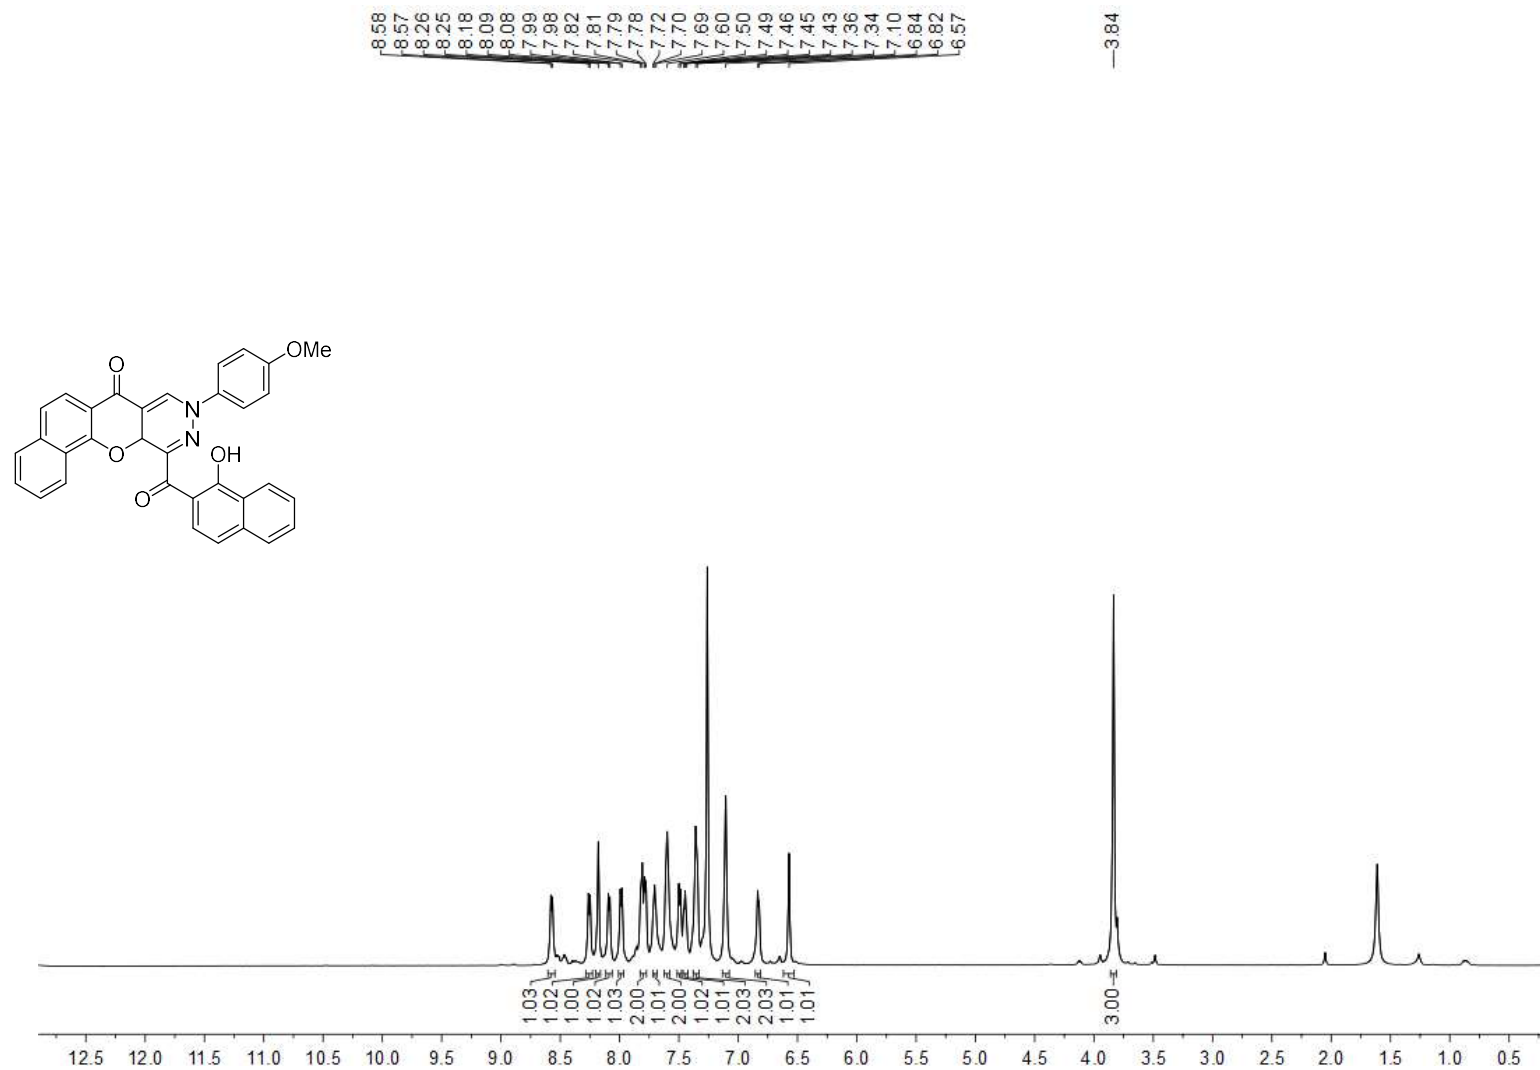

**Figure S25.**  $^1\text{H}$  NMR (600 MHz,  $\text{CDCl}_3$ ) spectra of compound **3I**

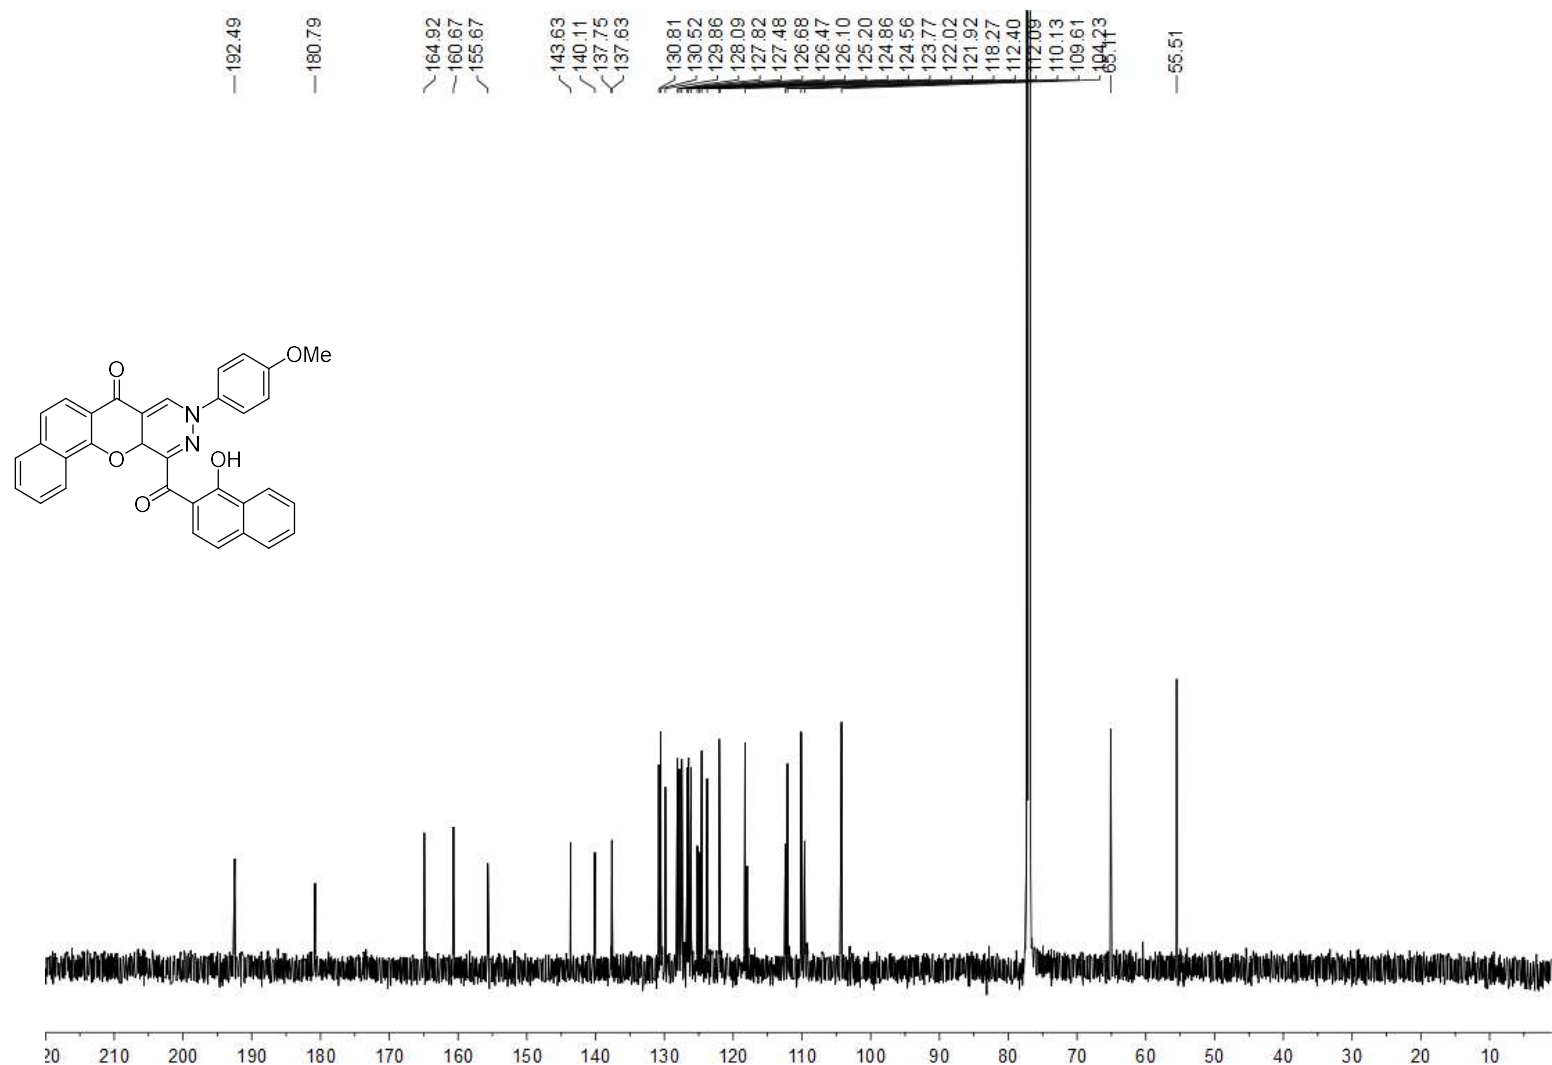

Figure S26. <sup>13</sup>C NMR (150 MHz, CDCl<sub>3</sub>) spectra of compound 31

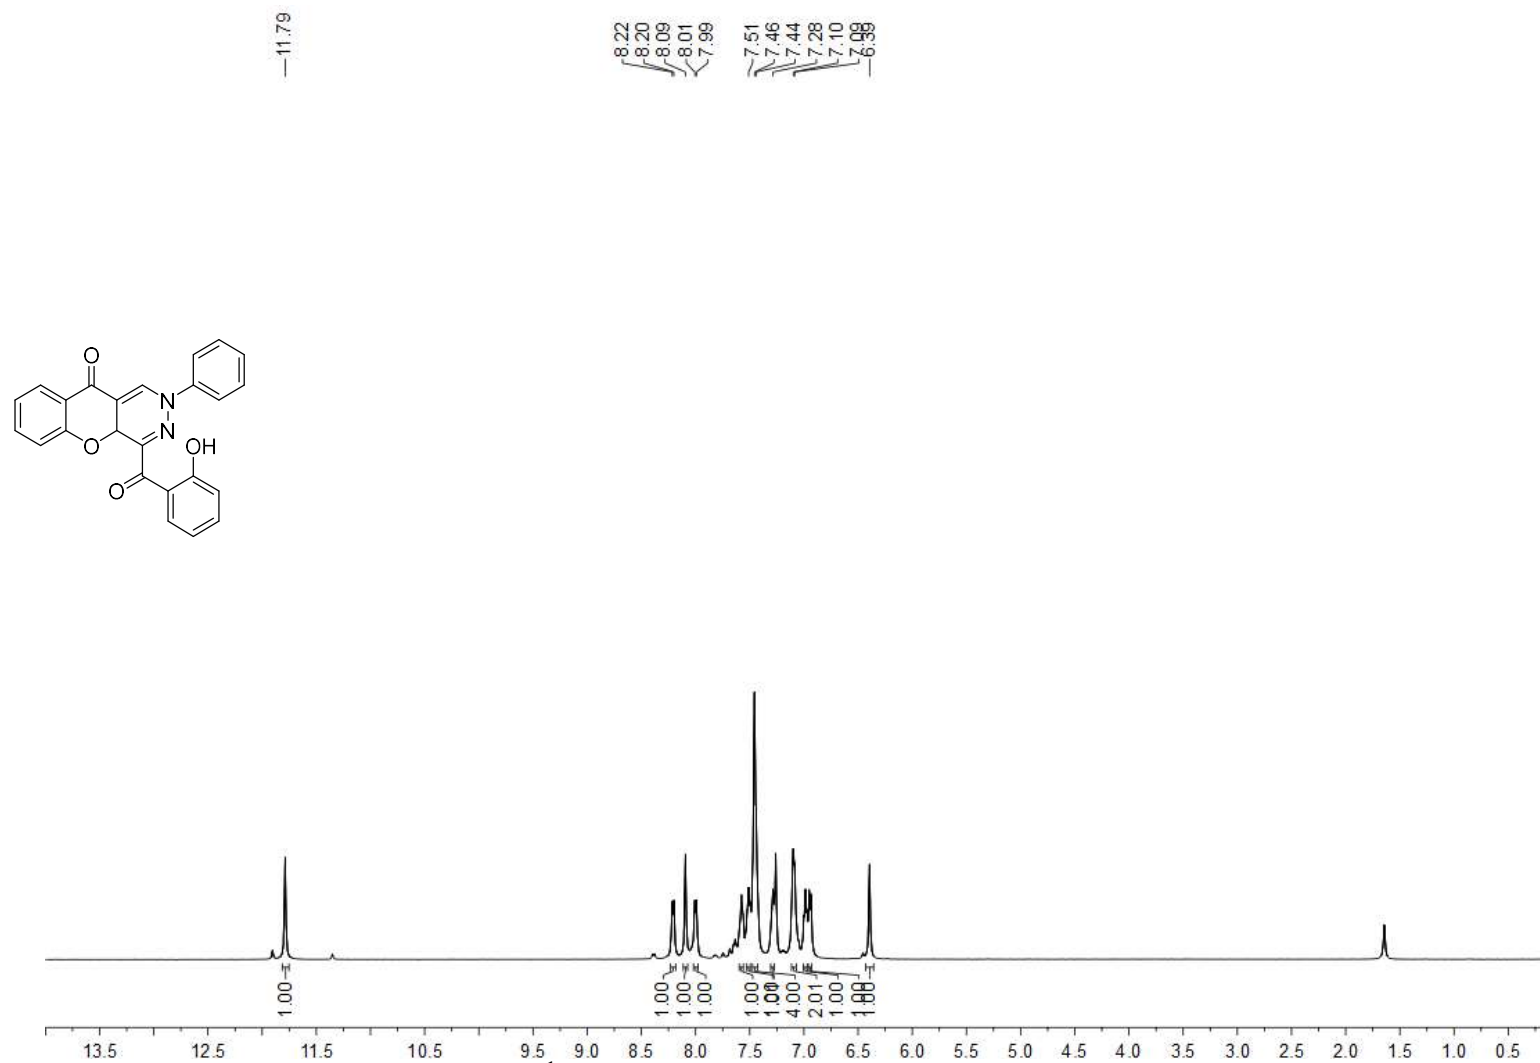

**Figure S27.** <sup>1</sup>H NMR (500 MHz, CDCl<sub>3</sub>) spectra of compound **3m**

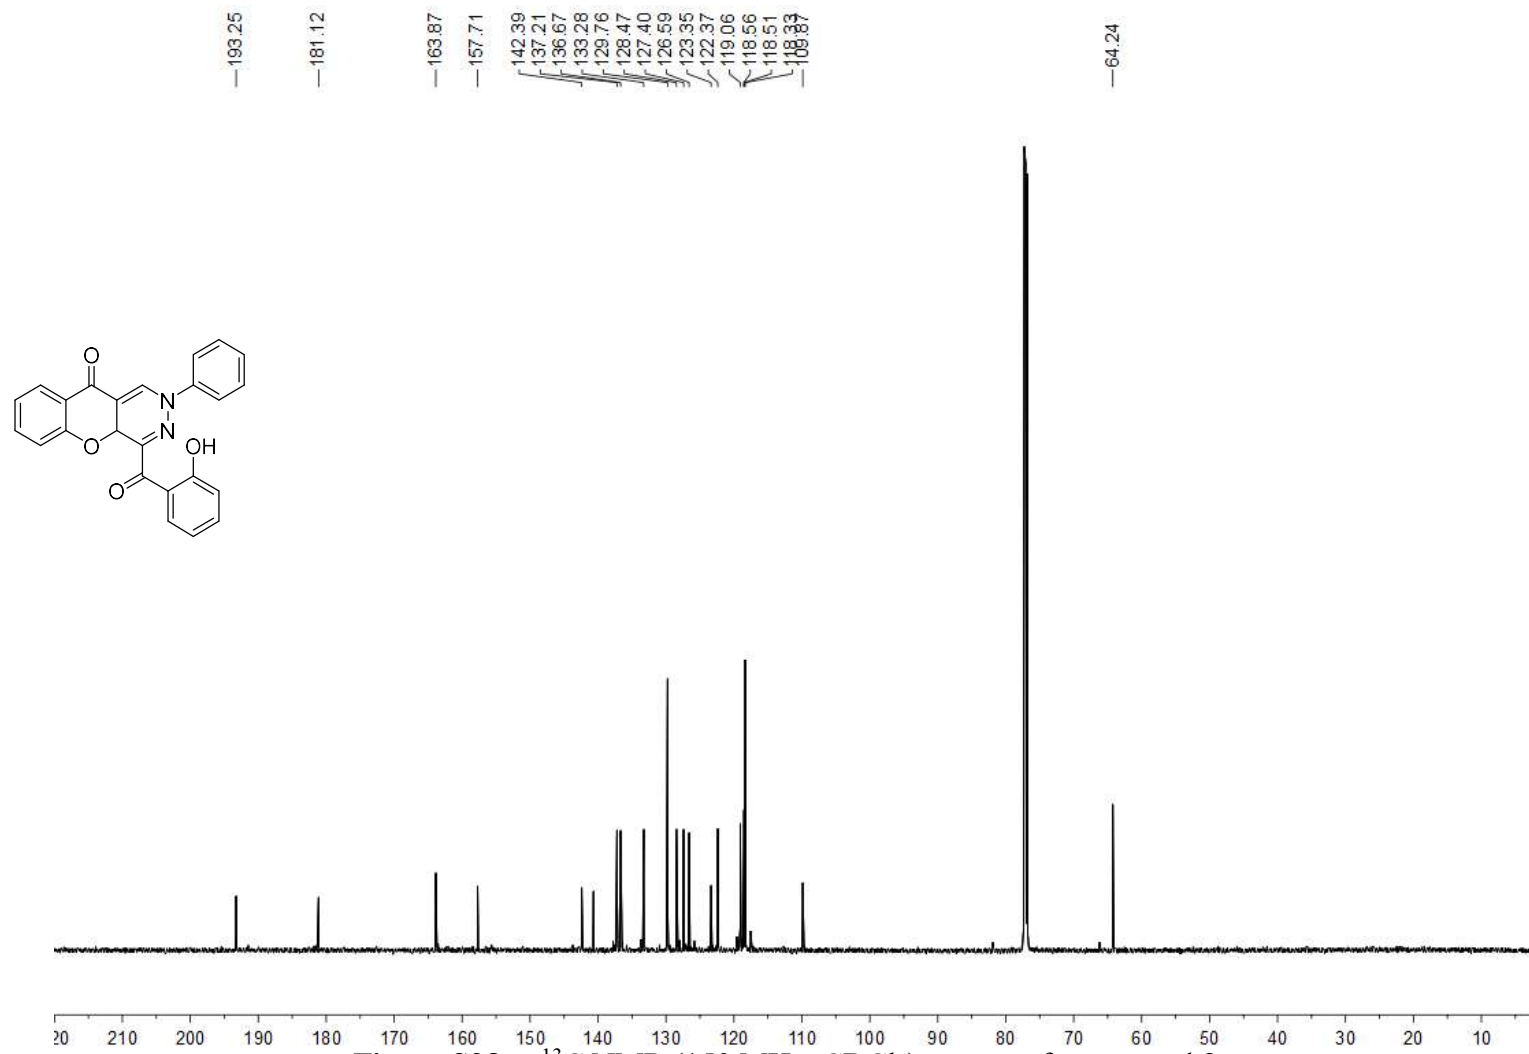

**Figure S28.**  $^{13}\text{C}$  NMR (150 MHz,  $\text{CDCl}_3$ ) spectra of compound **3m**

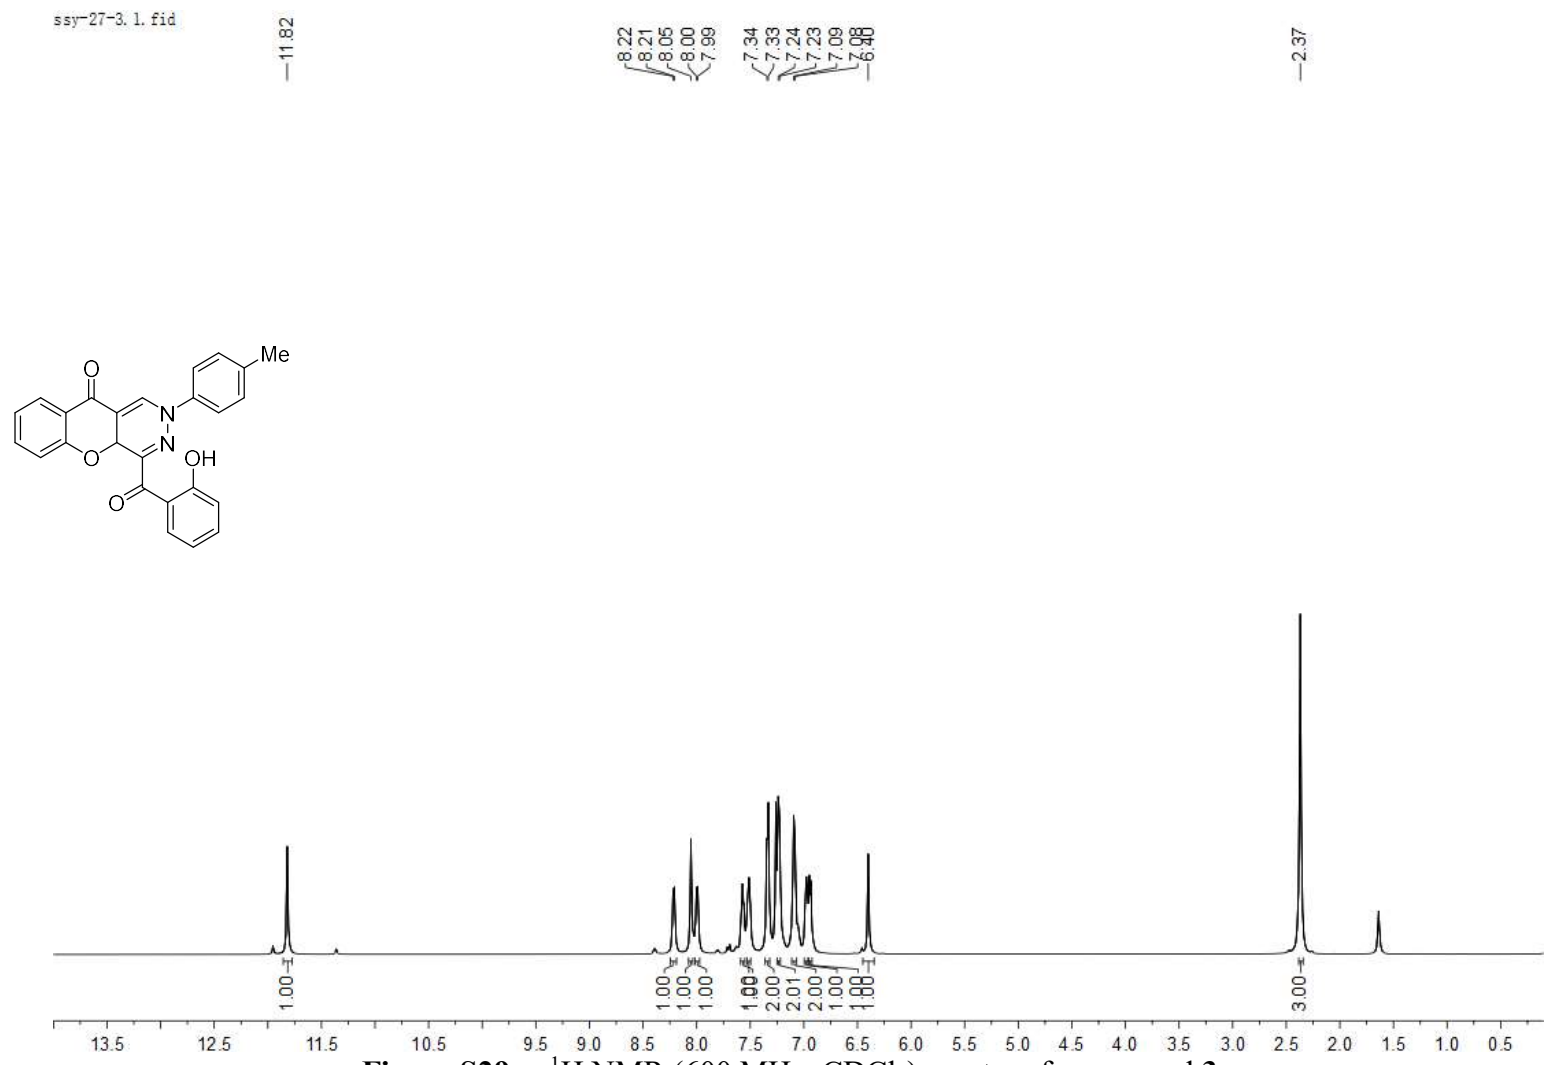

**Figure S29.**  $^1\text{H}$  NMR (600 MHz,  $\text{CDCl}_3$ ) spectra of compound **3n**

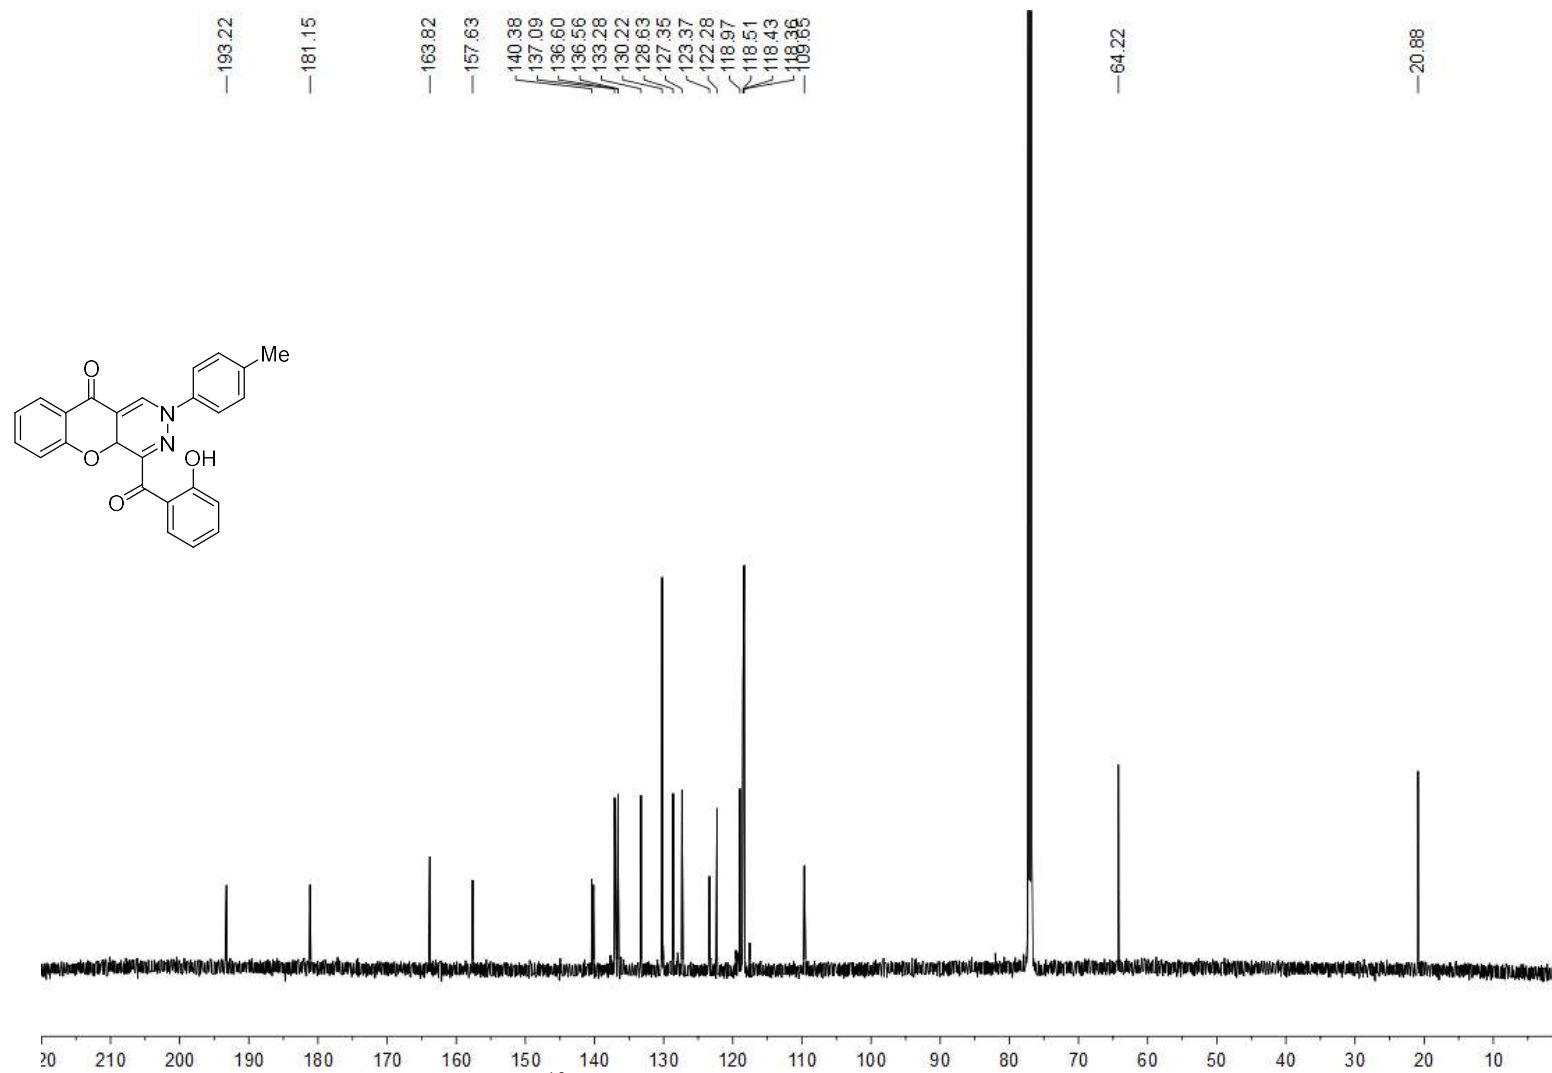

Figure S30. <sup>13</sup>C NMR (150 MHz, CDCl<sub>3</sub>) spectra of compound 3n

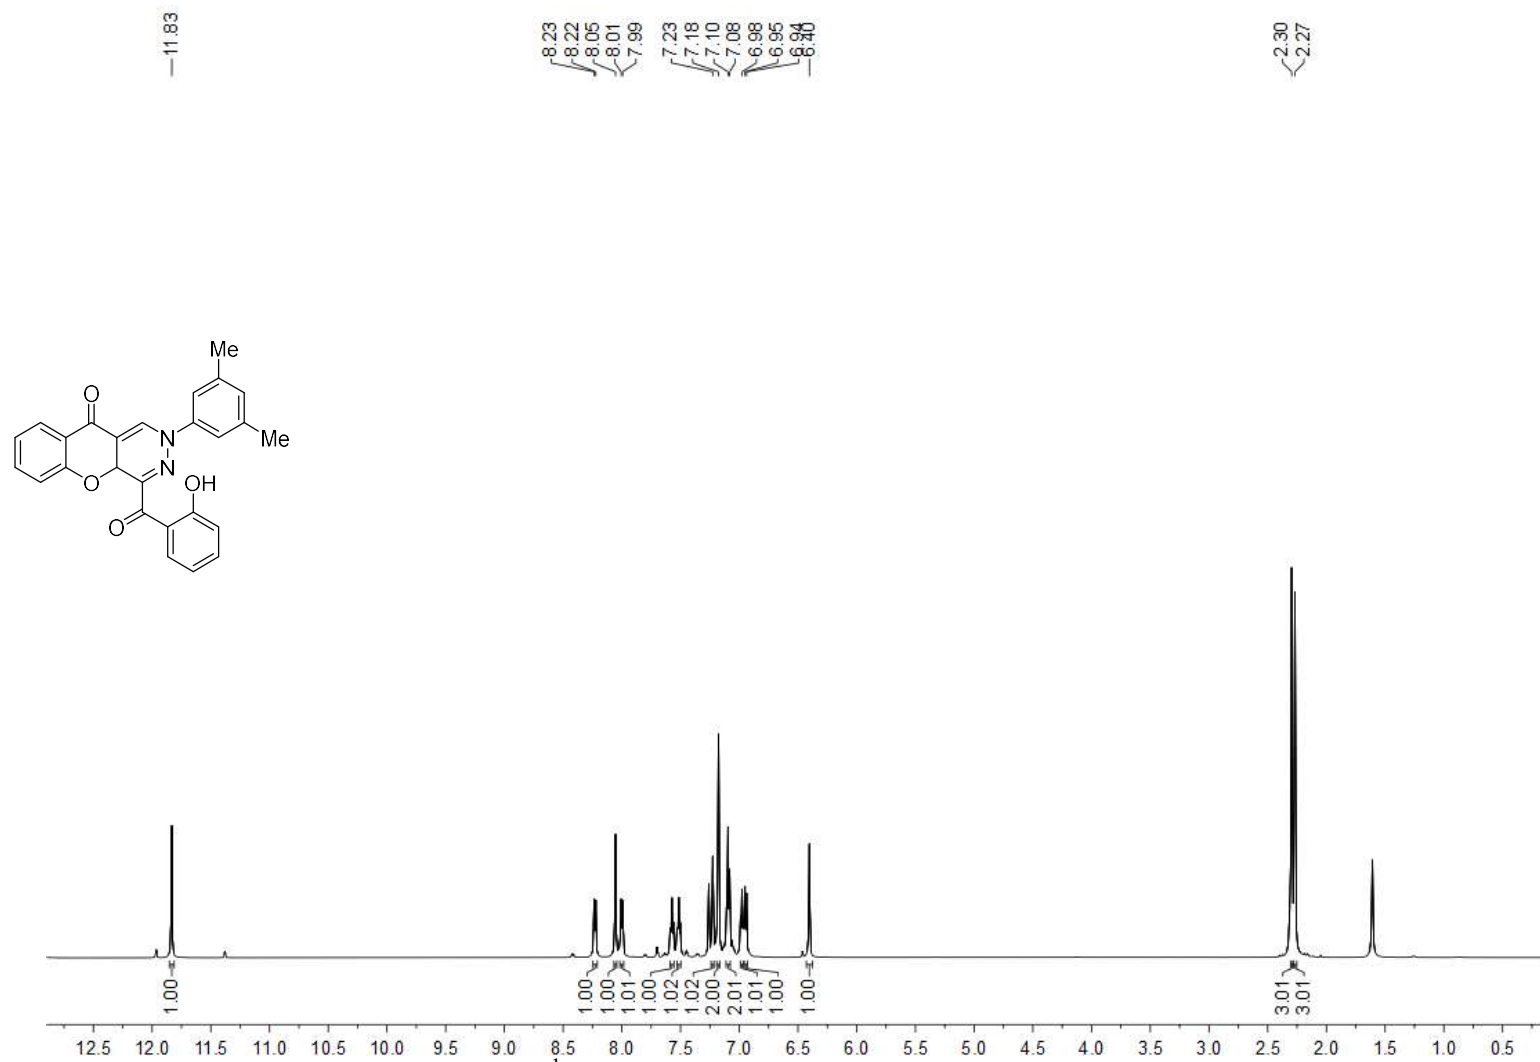

**Figure S31.** <sup>1</sup>H NMR (600 MHz, CDCl<sub>3</sub>) spectra of compound **3o**

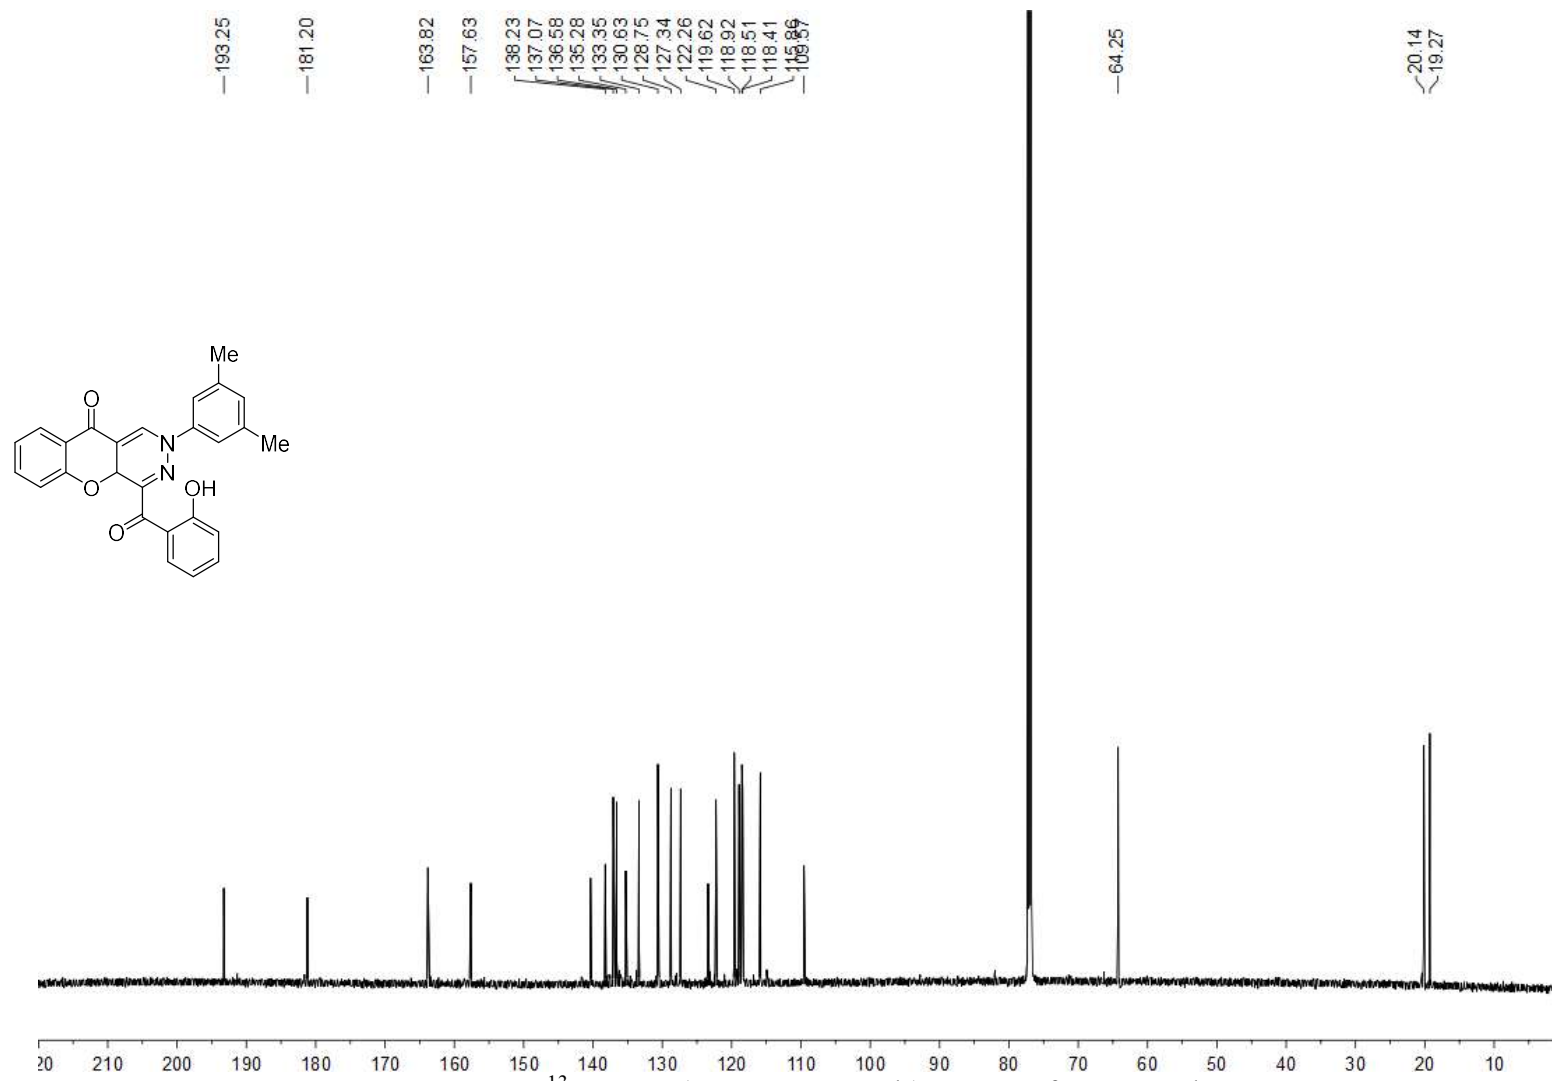



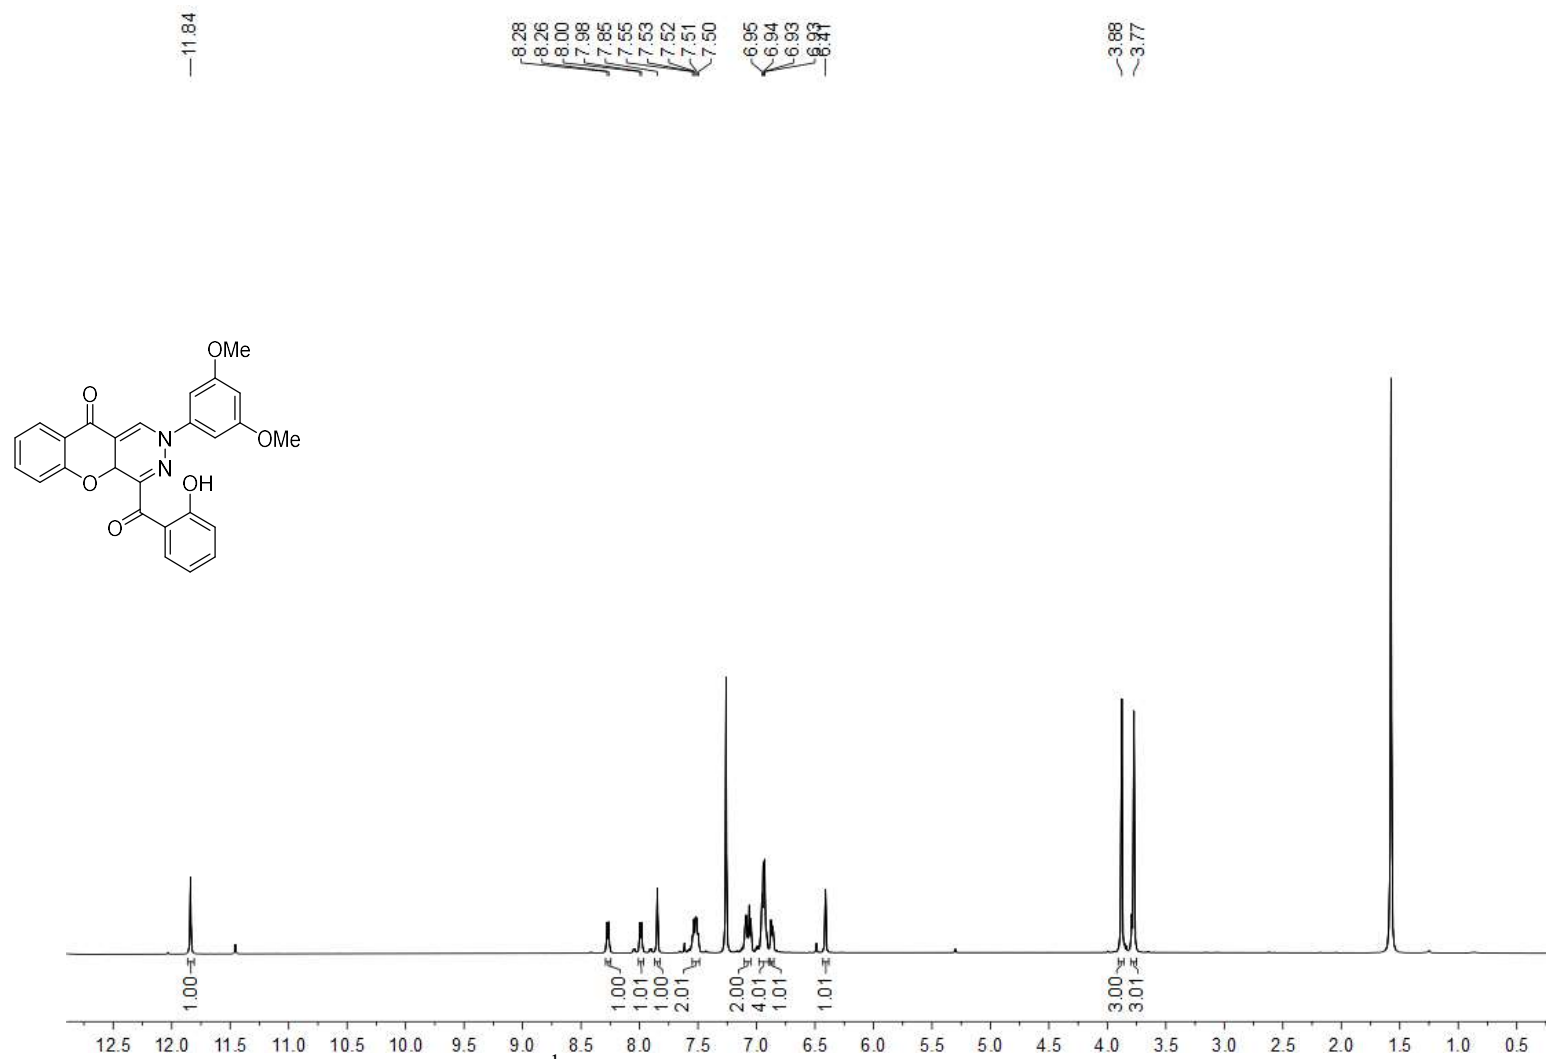

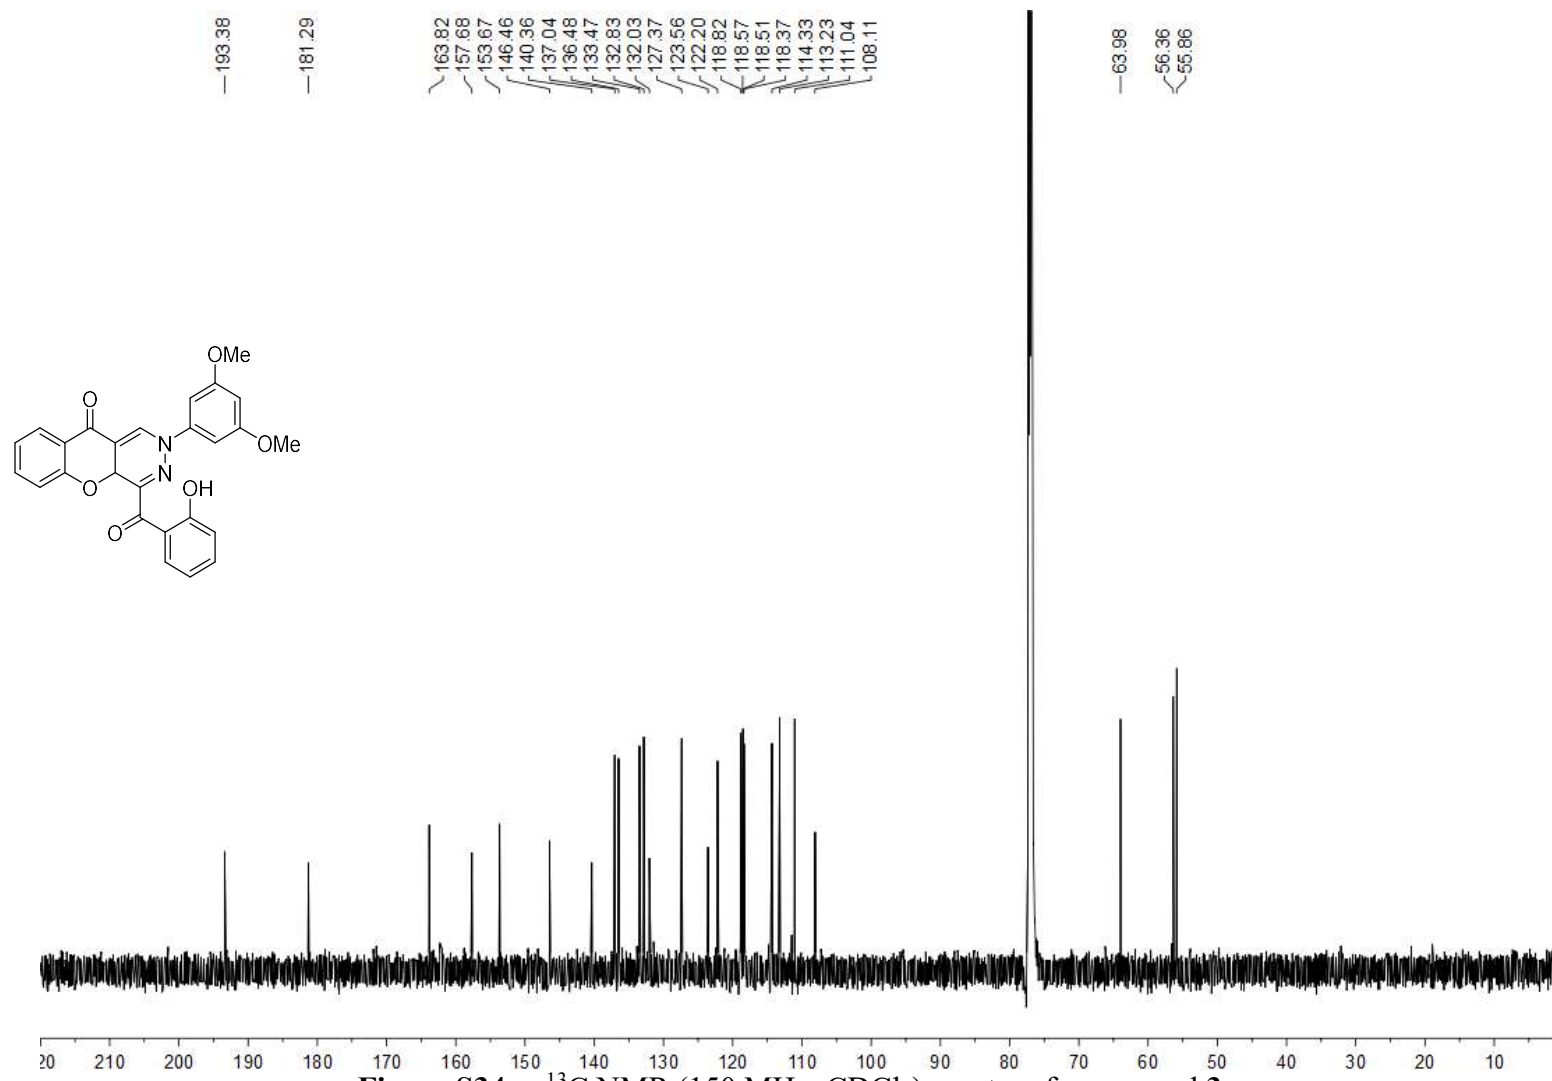

Figure S34. <sup>13</sup>C NMR (150 MHz, CDCl<sub>3</sub>) spectra of compound 3p

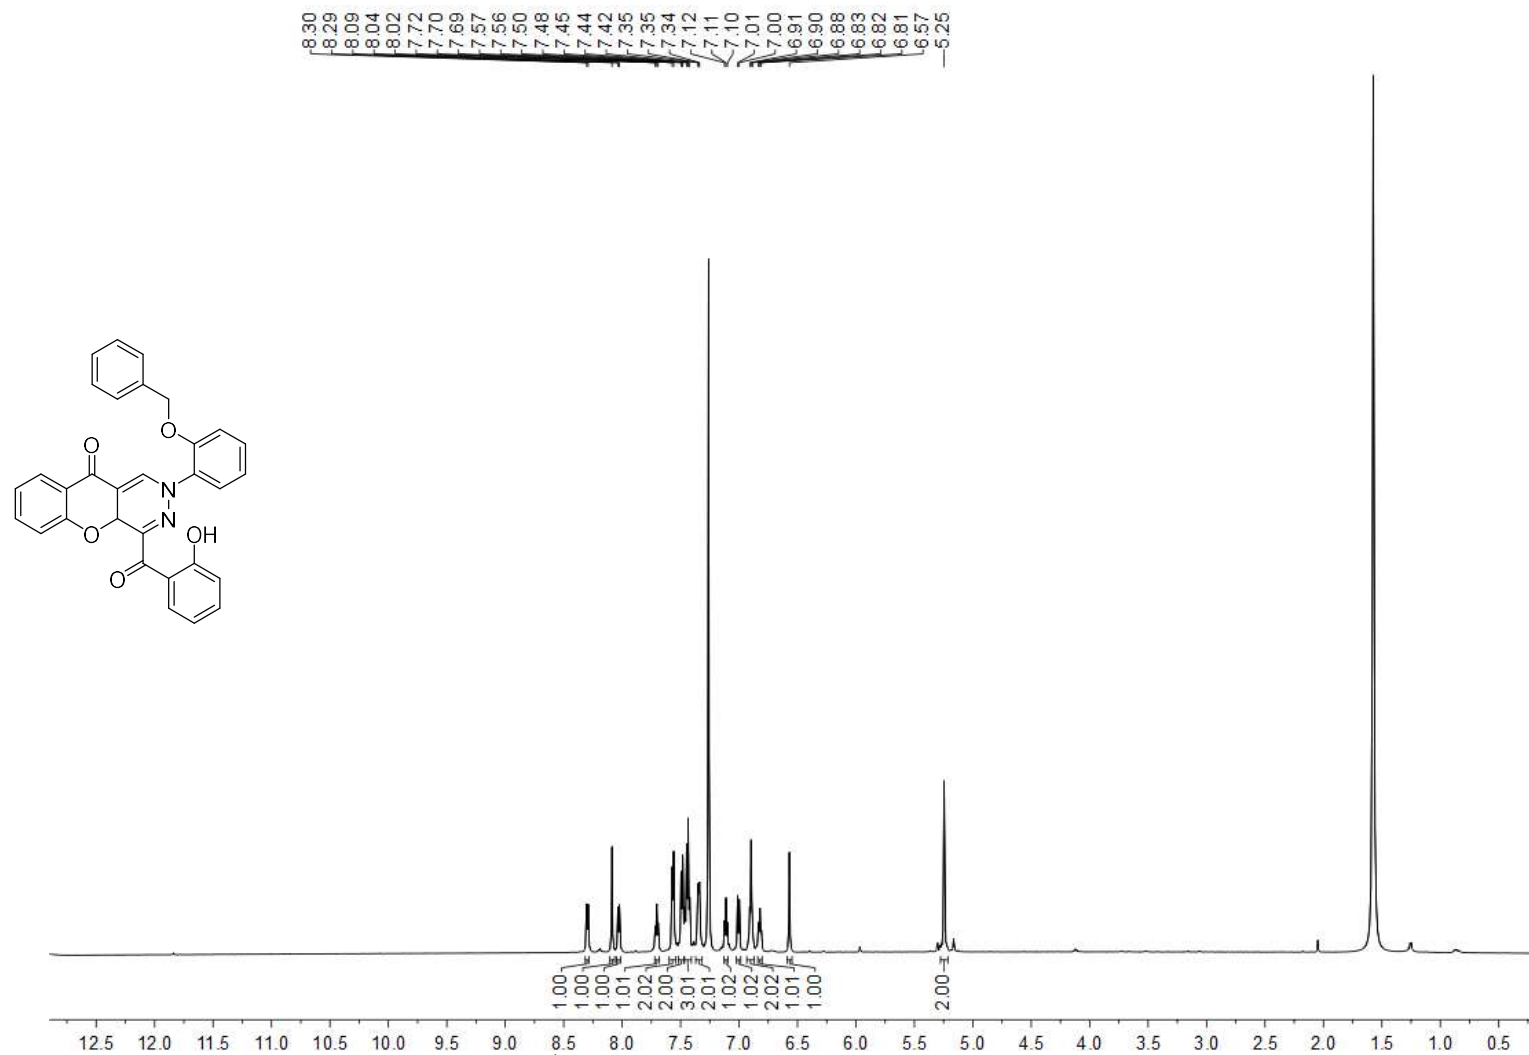

**Figure S35.** <sup>1</sup>H NMR (600 MHz, CDCl<sub>3</sub>) spectra of compound **3q**

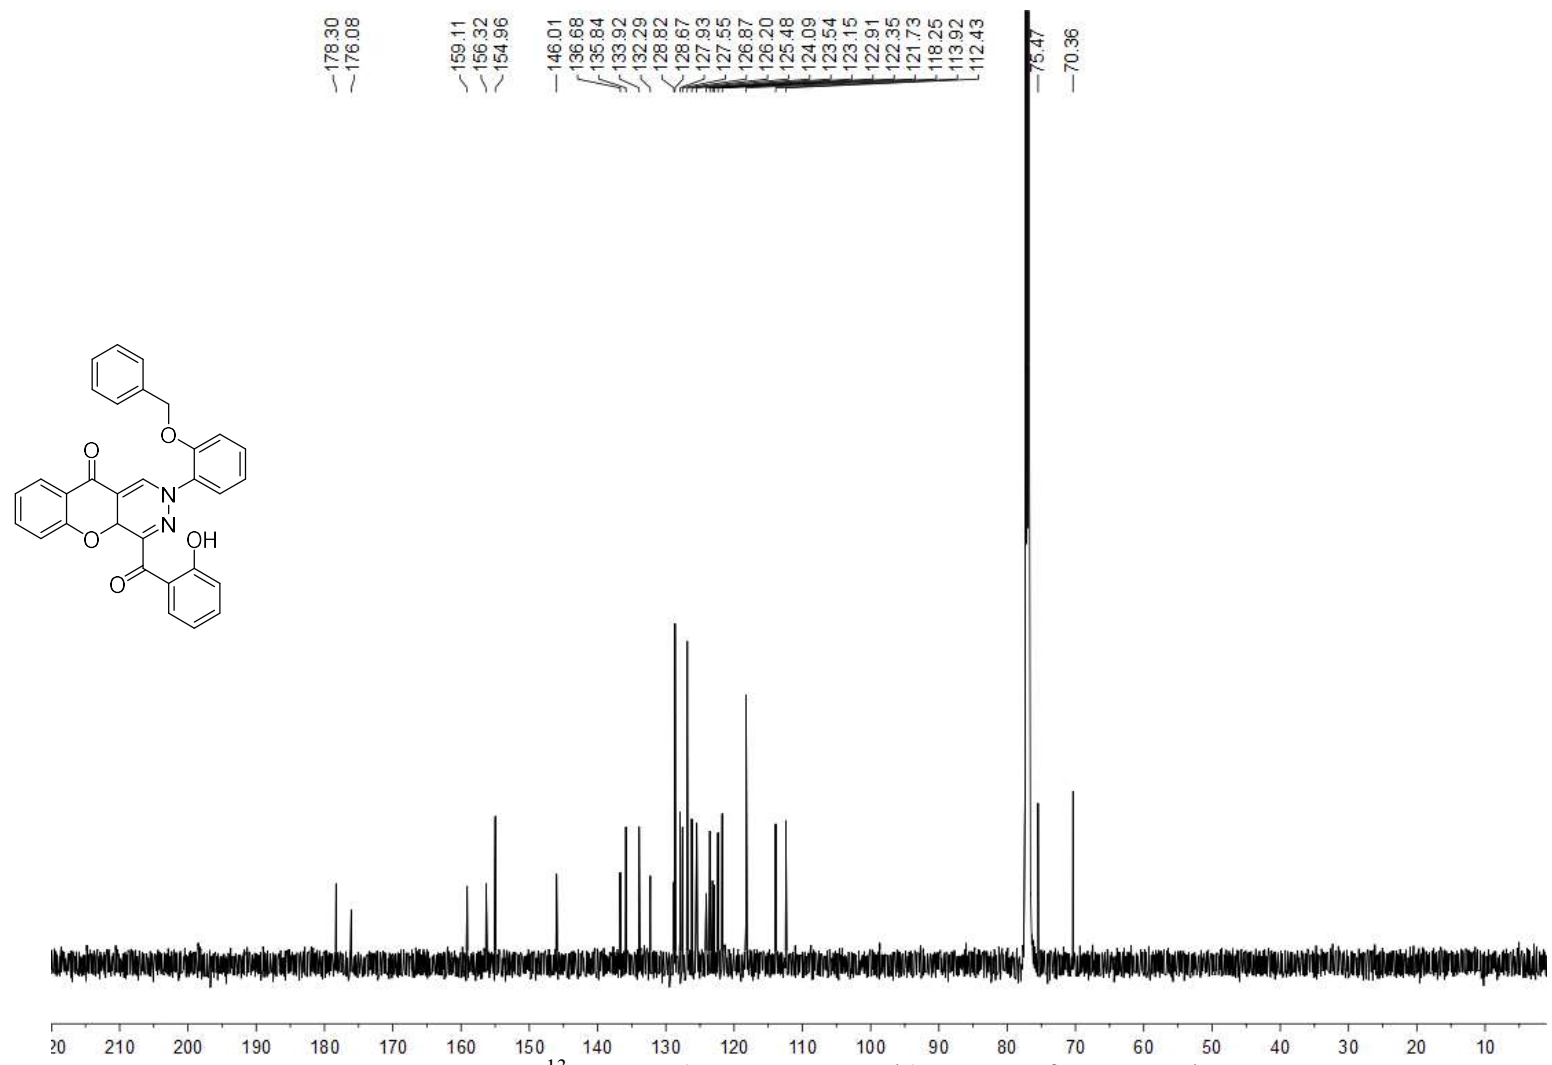

Figure S36. <sup>13</sup>C NMR (150 MHz, CDCl<sub>3</sub>) spectra of compound 3q

ssy-47-1. 1. fid

11.78  
8.21  
8.20  
8.00  
7.98  
7.84  
7.57  
7.56  
7.54  
7.53  
7.51  
7.50  
7.44  
7.34  
7.33  
7.24  
7.23  
7.22  
7.11  
7.10  
7.08  
7.07  
7.06  
6.97  
6.95  
6.94

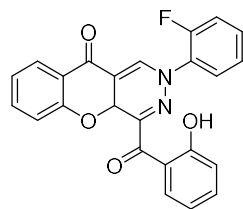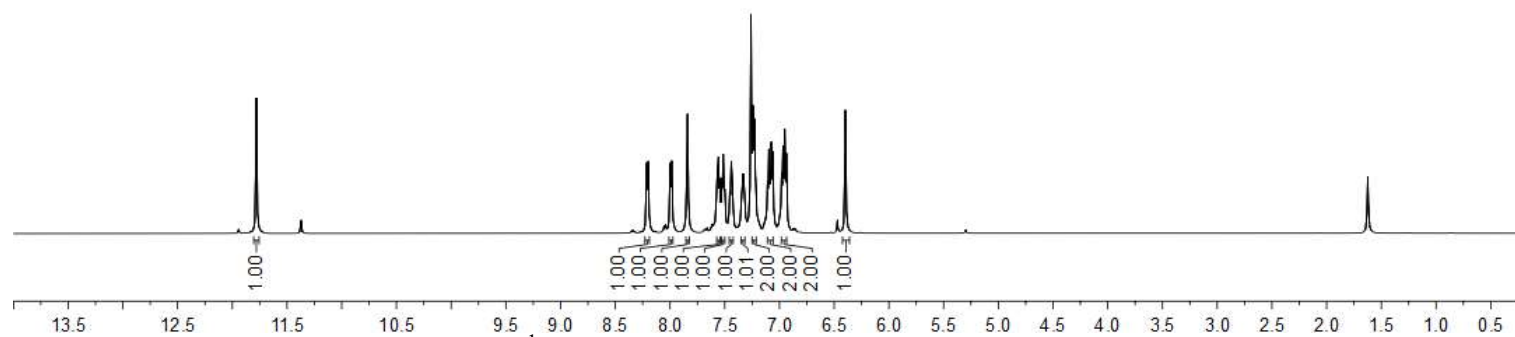

Figure S37.  $^1\text{H}$  NMR (600 MHz,  $\text{CDCl}_3$ ) spectra of compound **3r**

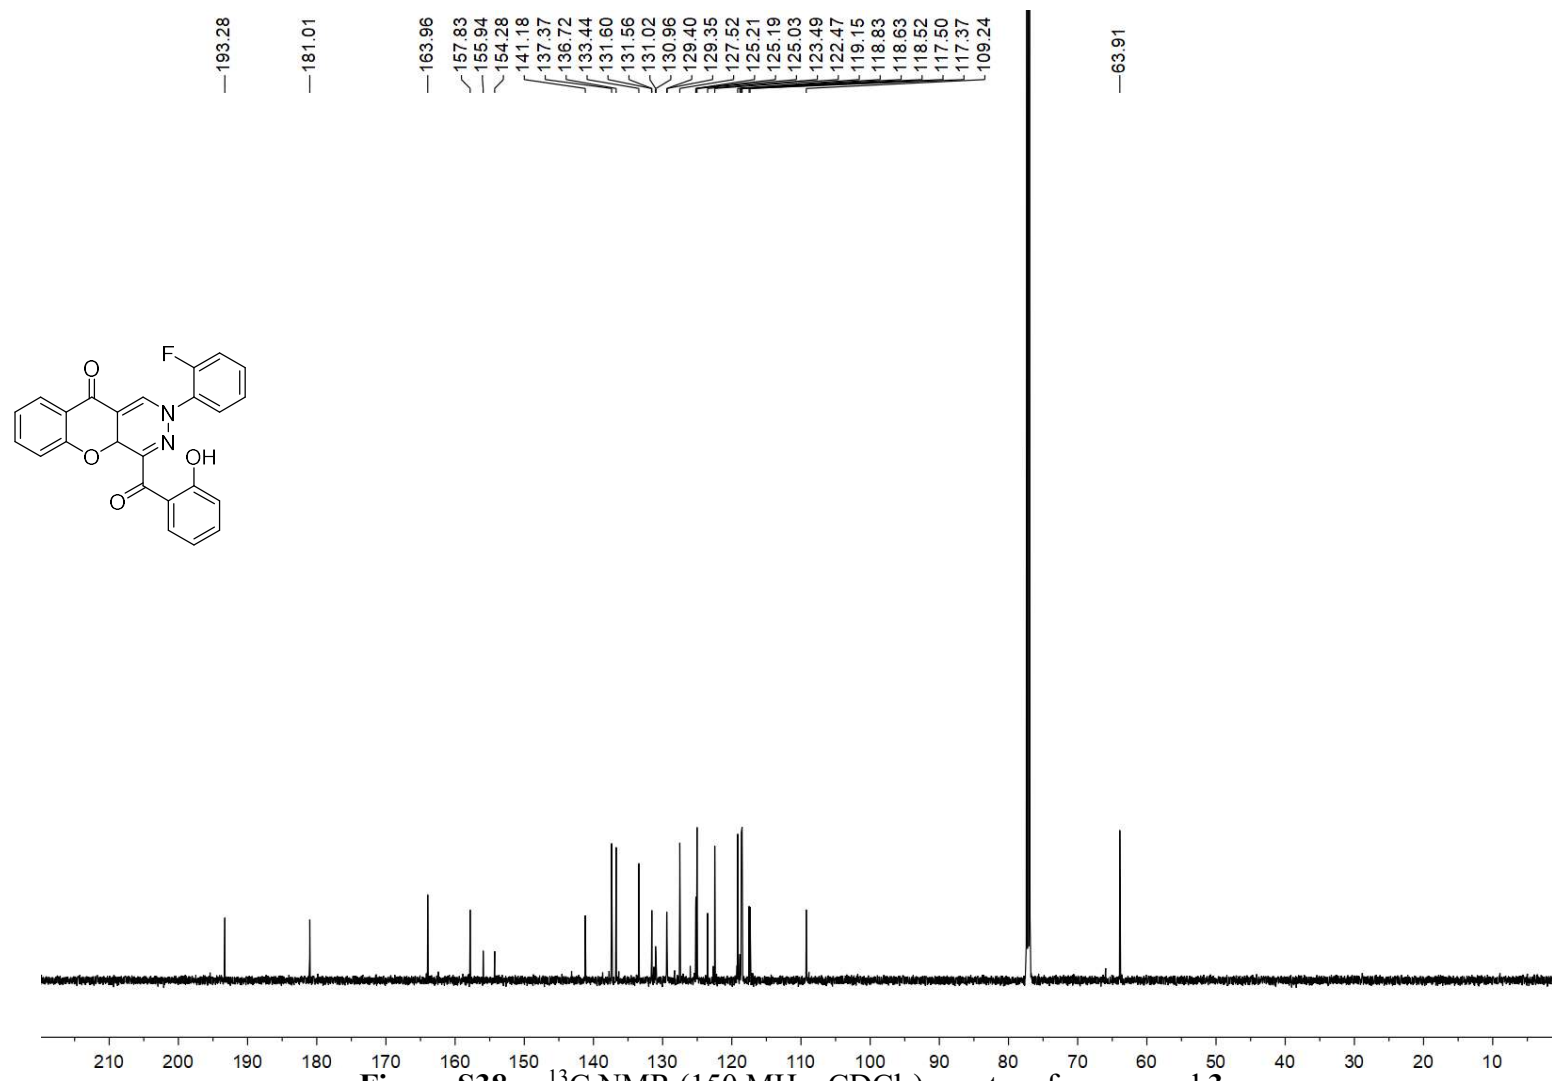

Figure S38. <sup>13</sup>C NMR (150 MHz, CDCl<sub>3</sub>) spectra of compound 3r

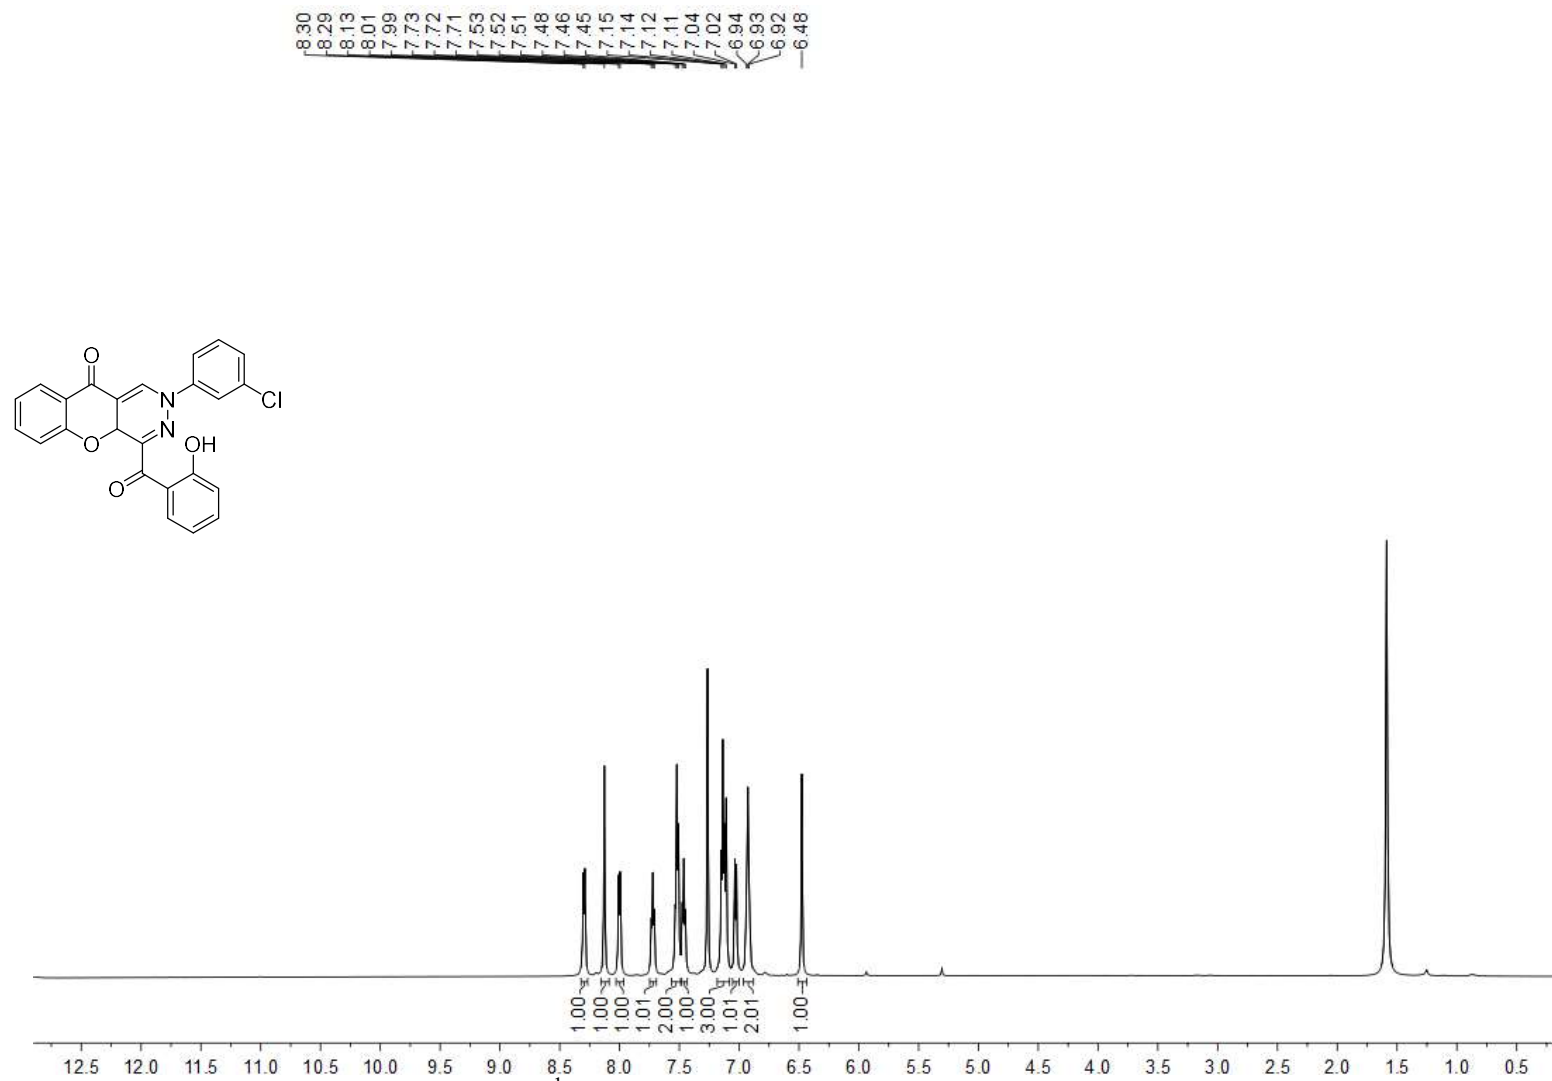

**Figure S39.** <sup>1</sup>H NMR (600 MHz, CDCl<sub>3</sub>) spectra of compound 3s

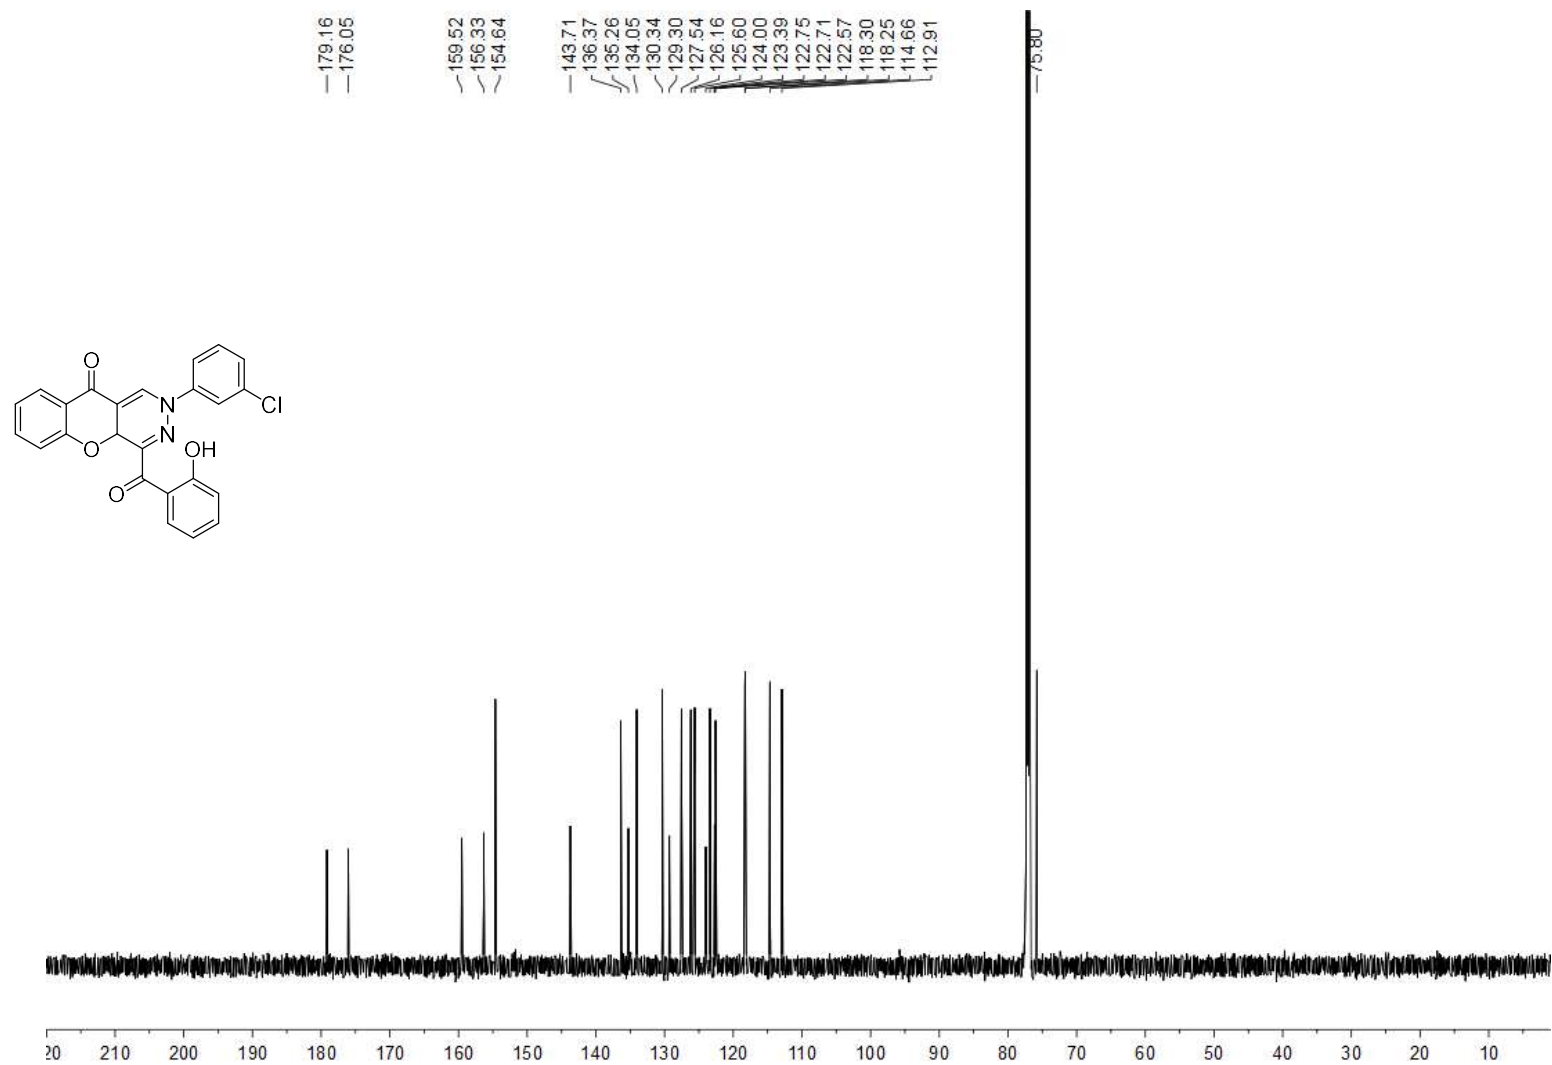

Figure S40. <sup>13</sup>C NMR (150 MHz, CDCl<sub>3</sub>) spectra of compound 3s



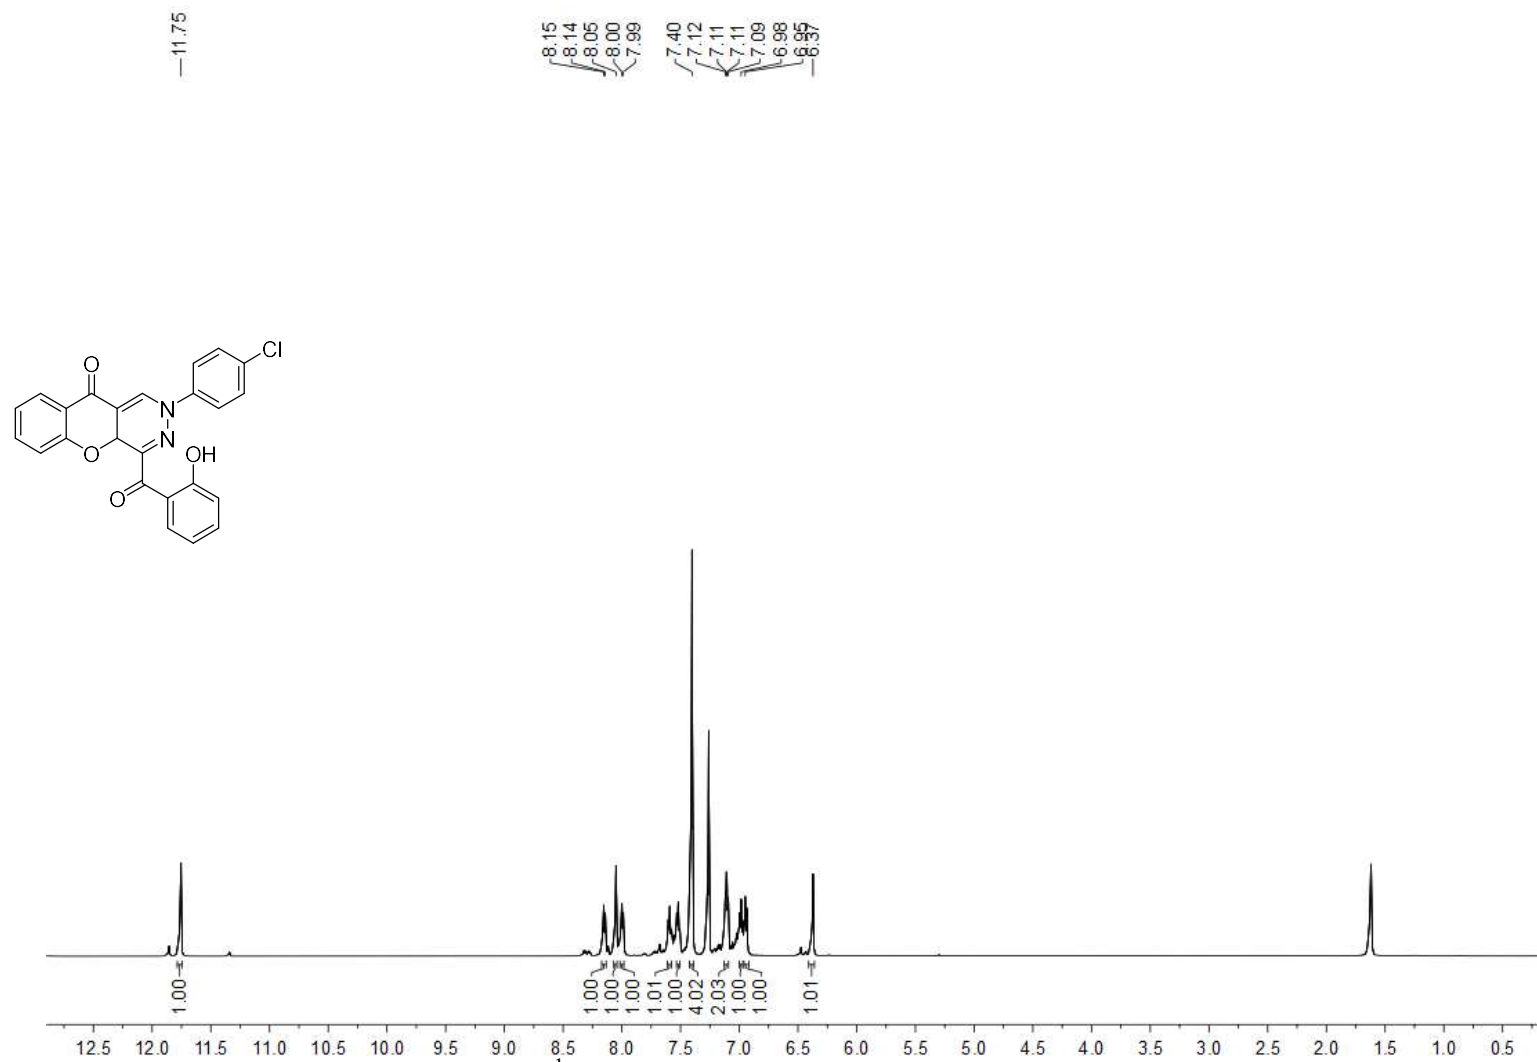

**Figure S41.** <sup>1</sup>H NMR (600 MHz, CDCl<sub>3</sub>) spectra of compound **3t**

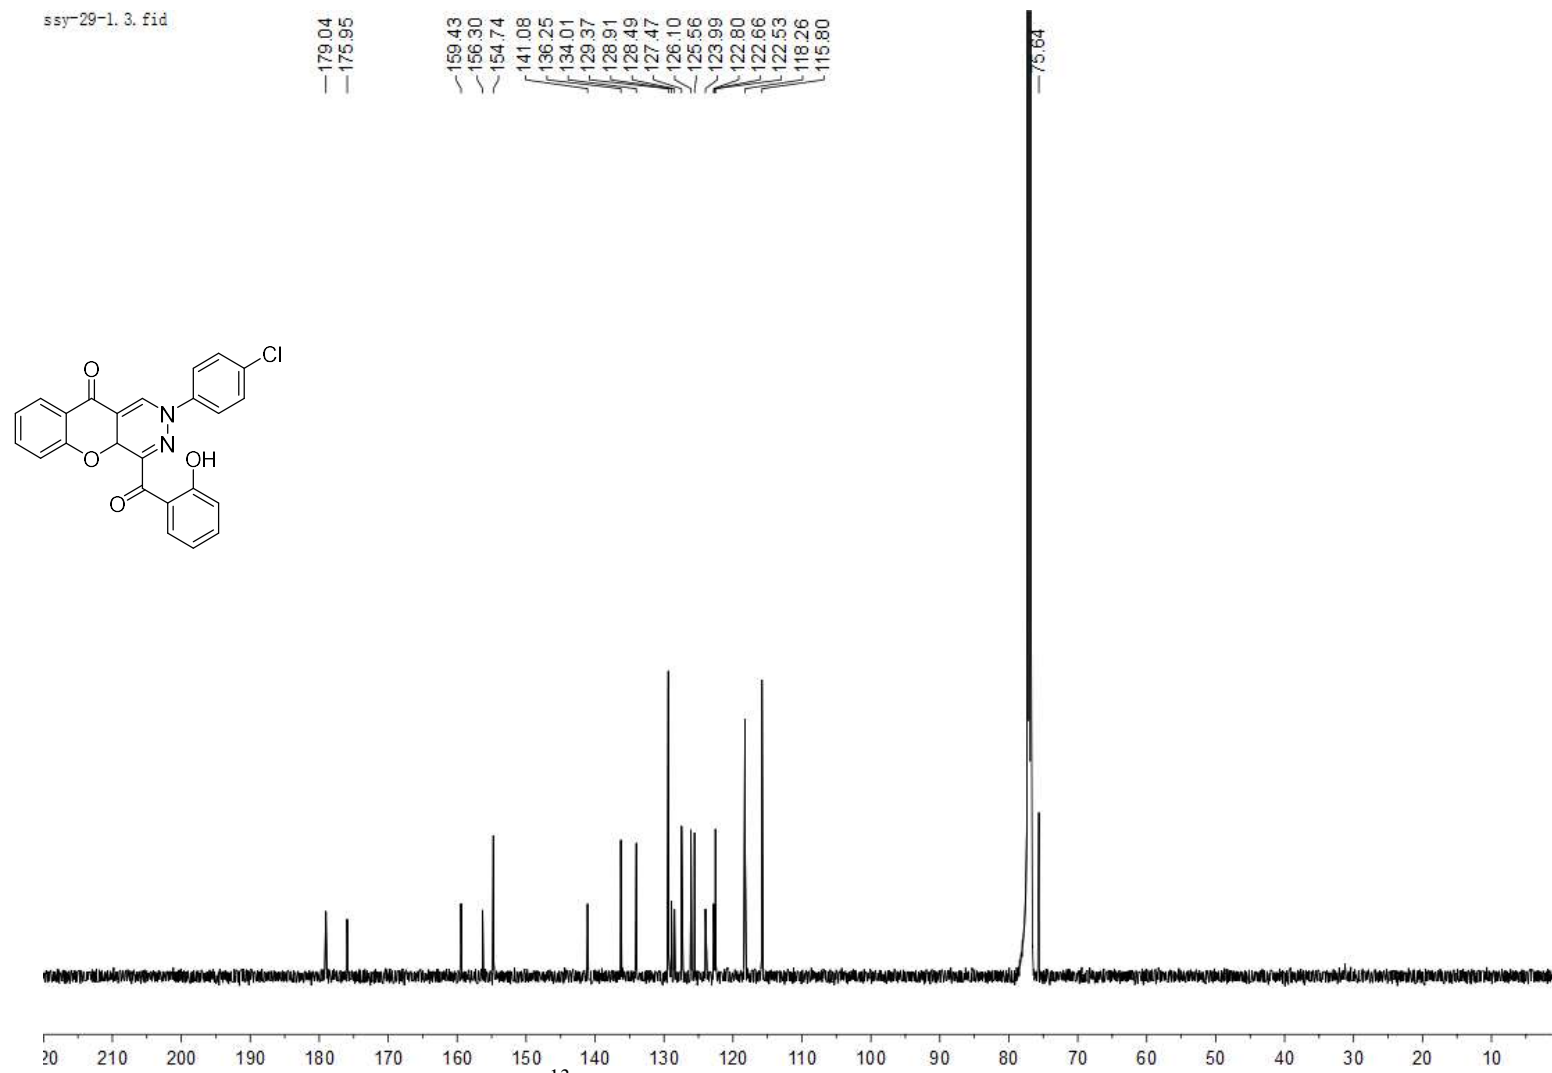

Figure S42. <sup>13</sup>C NMR (150 MHz, CDCl<sub>3</sub>) spectra of compound 3t

ssy-31-2.1.fid

11.74

8.15  
8.05  
8.00  
7.64  
7.60  
7.52  
7.40  
7.30  
7.11  
7.00  
6.95  
6.36

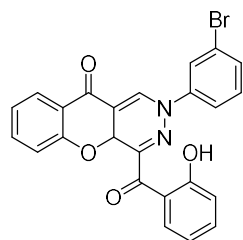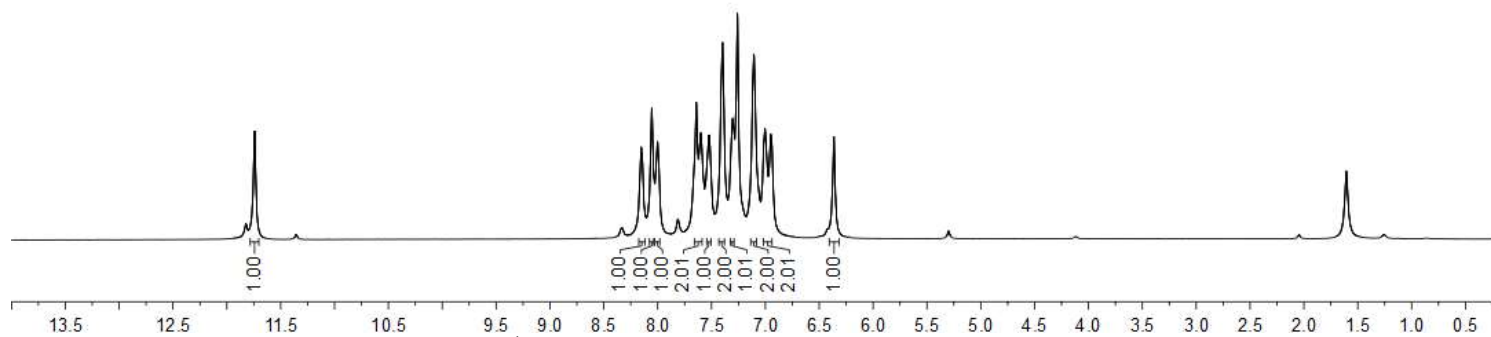

Figure S43.  $^1\text{H}$  NMR (600 MHz,  $\text{CDCl}_3$ ) spectra of compound **3u**

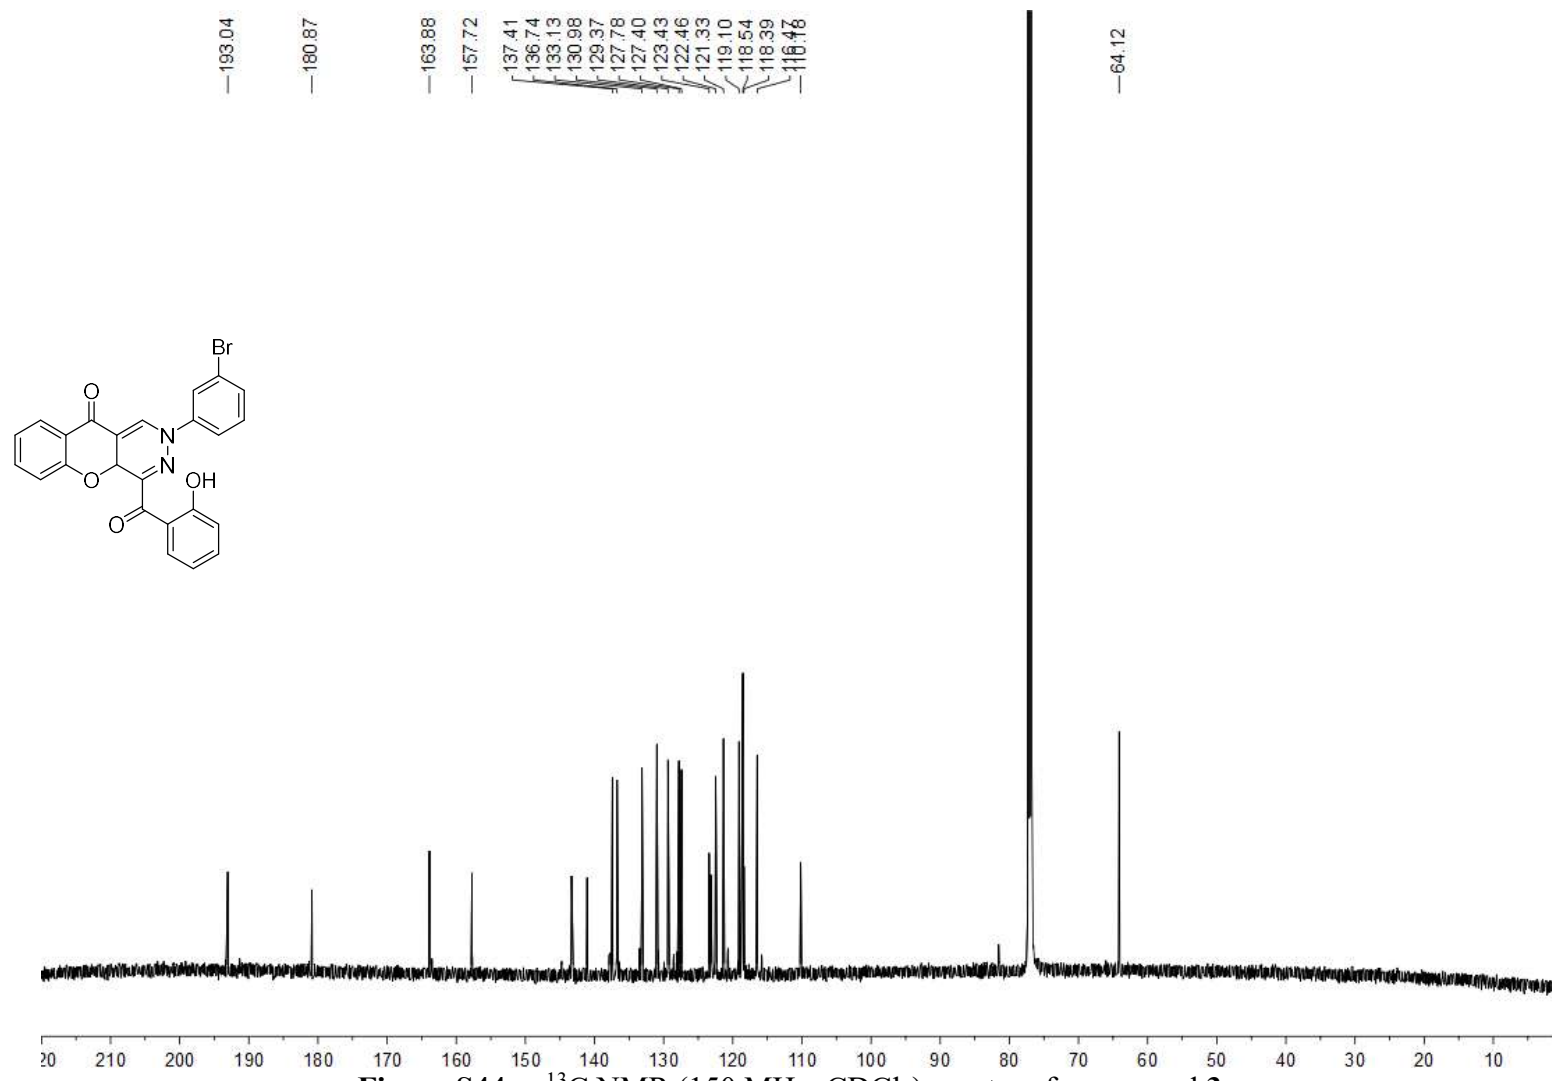

Figure S44. <sup>13</sup>C NMR (150 MHz, CDCl<sub>3</sub>) spectra of compound 3u

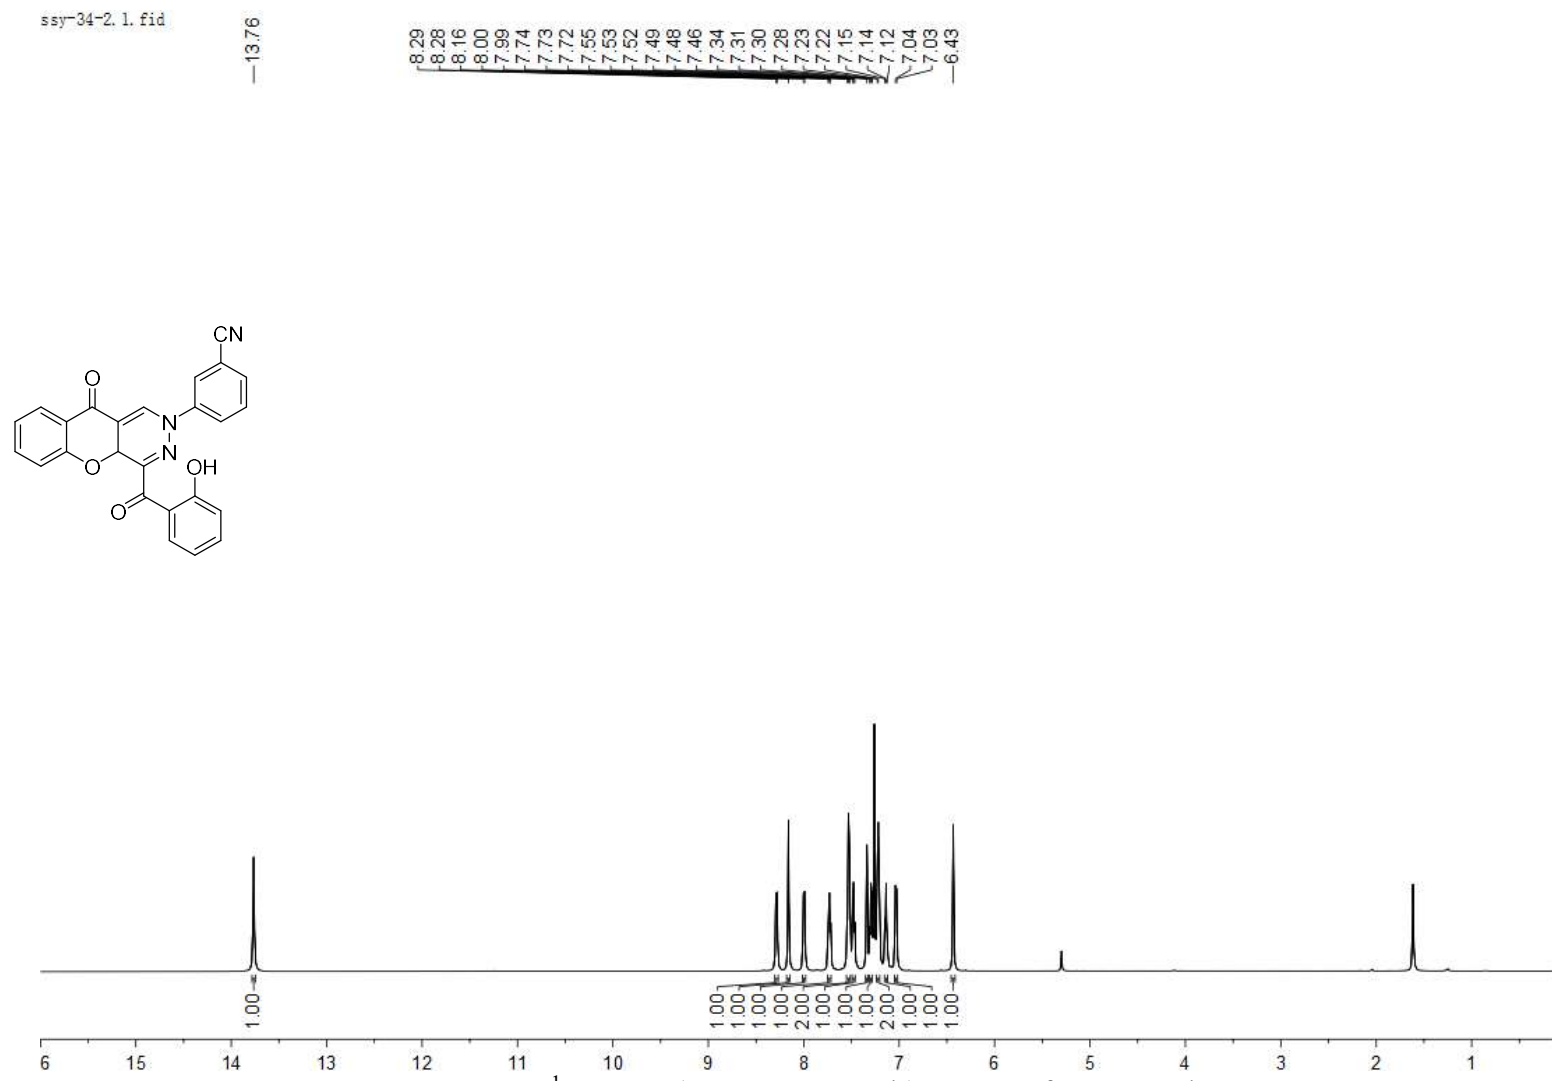

Figure S45. <sup>1</sup>H NMR (600 MHz, CDCl<sub>3</sub>) spectra of compound 3v

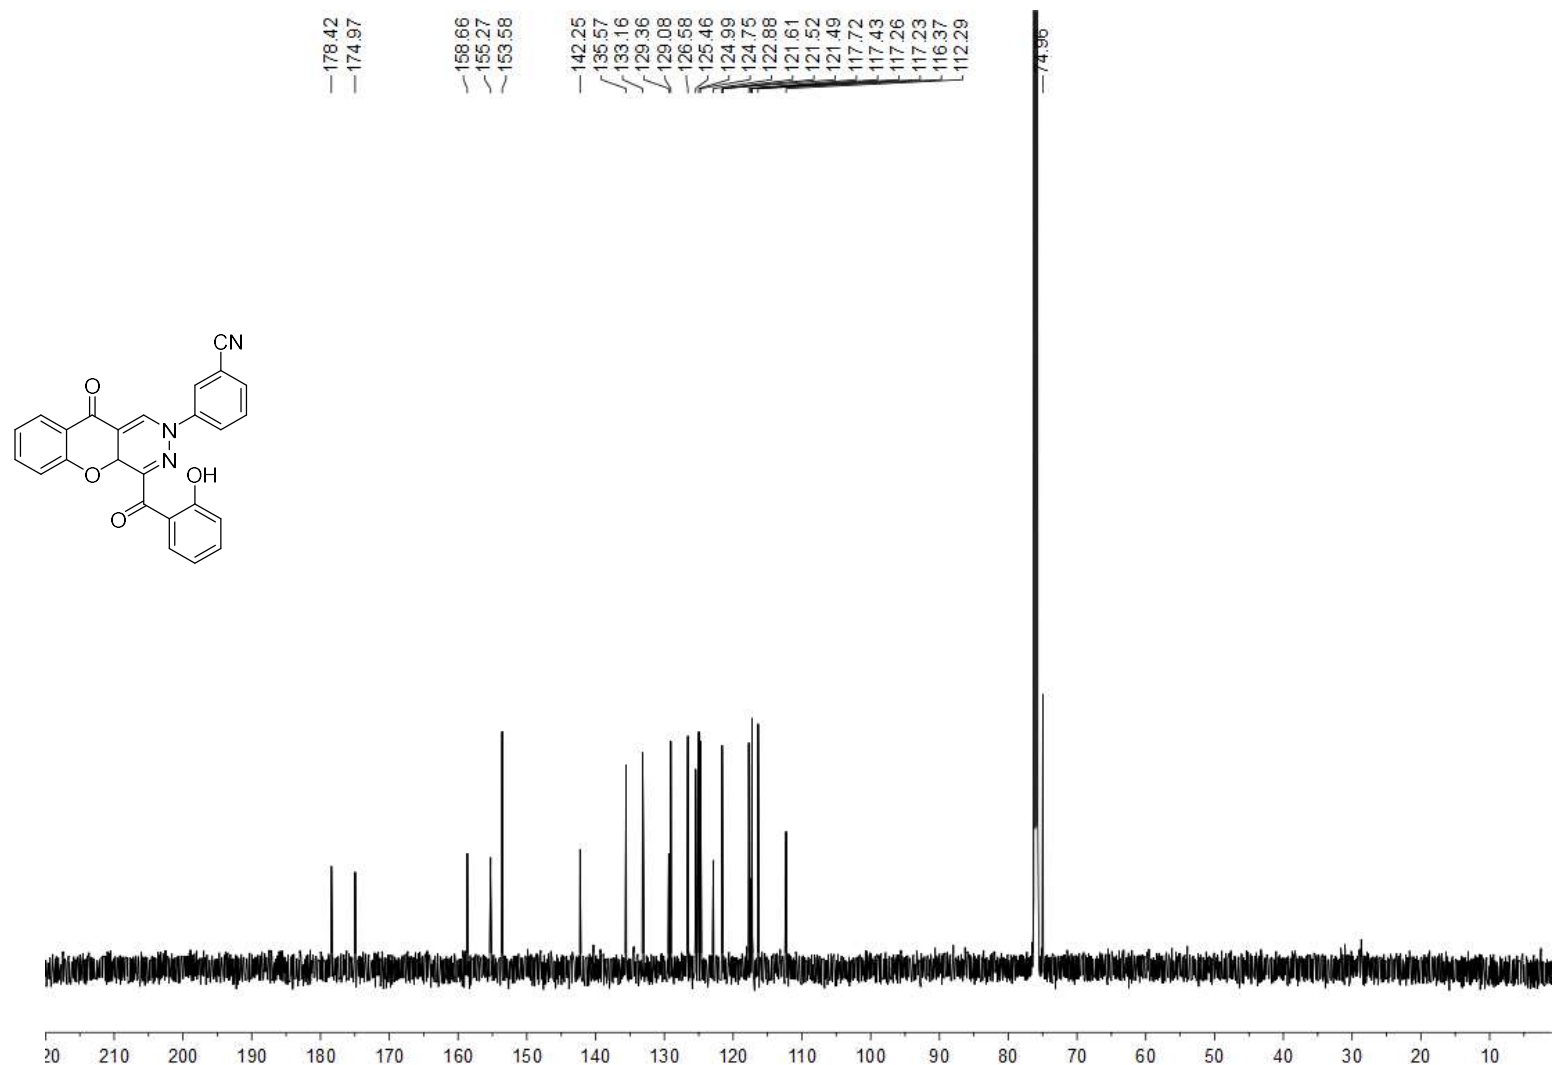

Figure S46. <sup>13</sup>C NMR (150 MHz, CDCl<sub>3</sub>) spectra of compound 3v

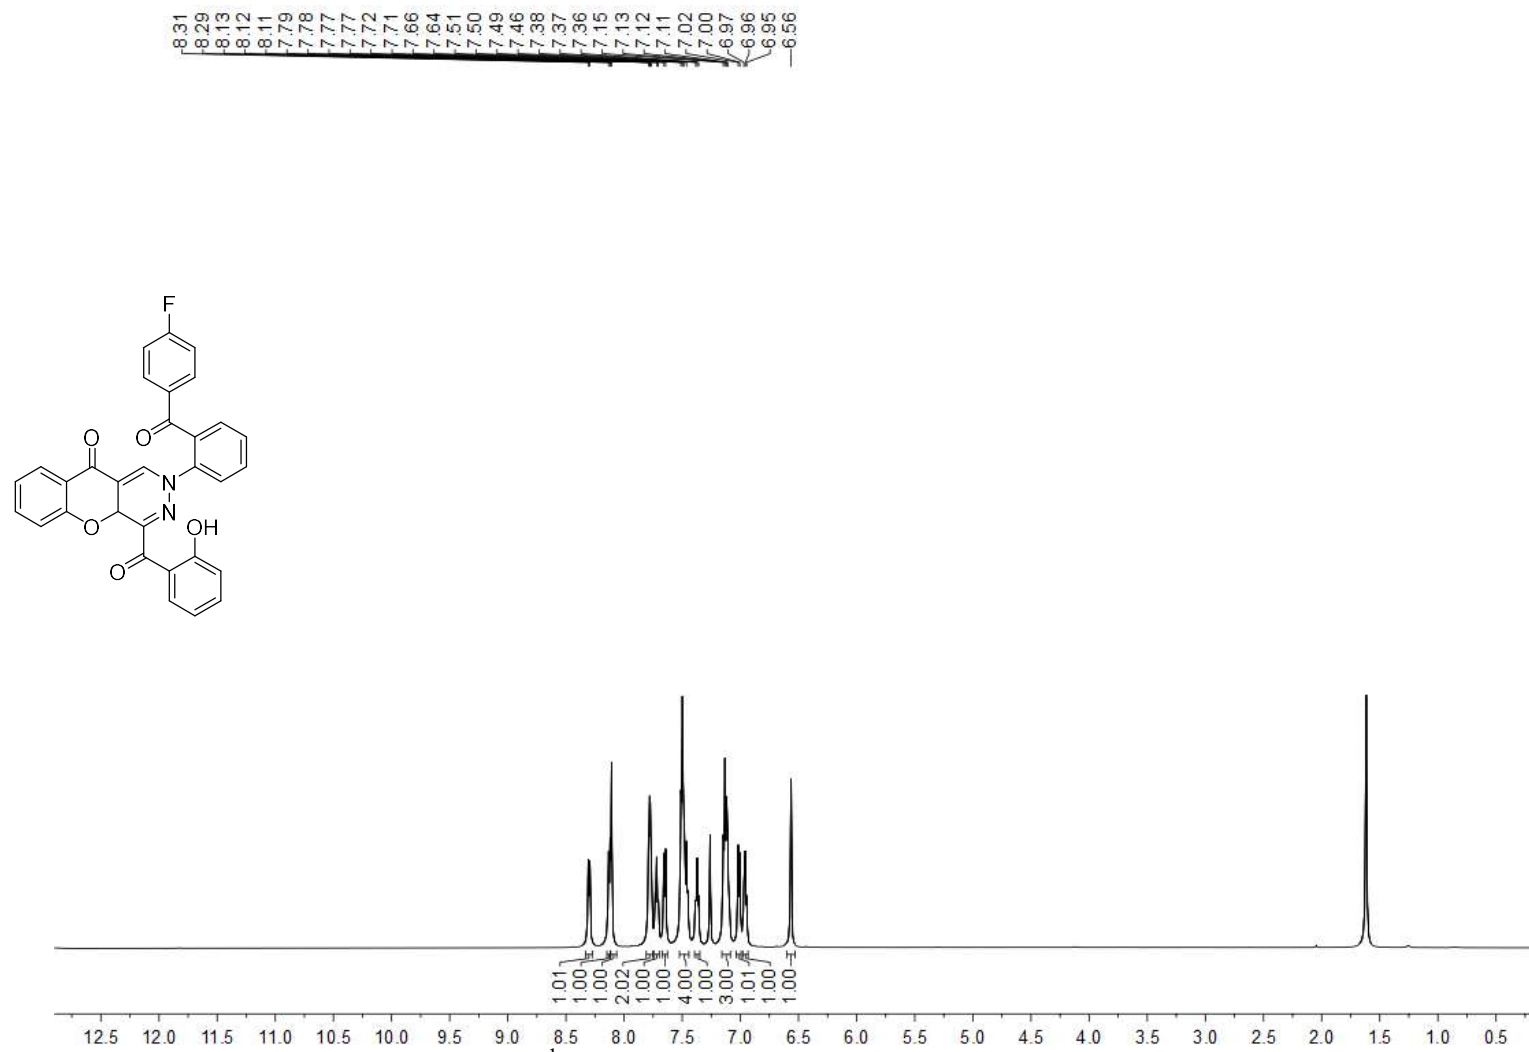

Figure S47. <sup>1</sup>H NMR (600 MHz, CDCl<sub>3</sub>) spectra of compound 3w

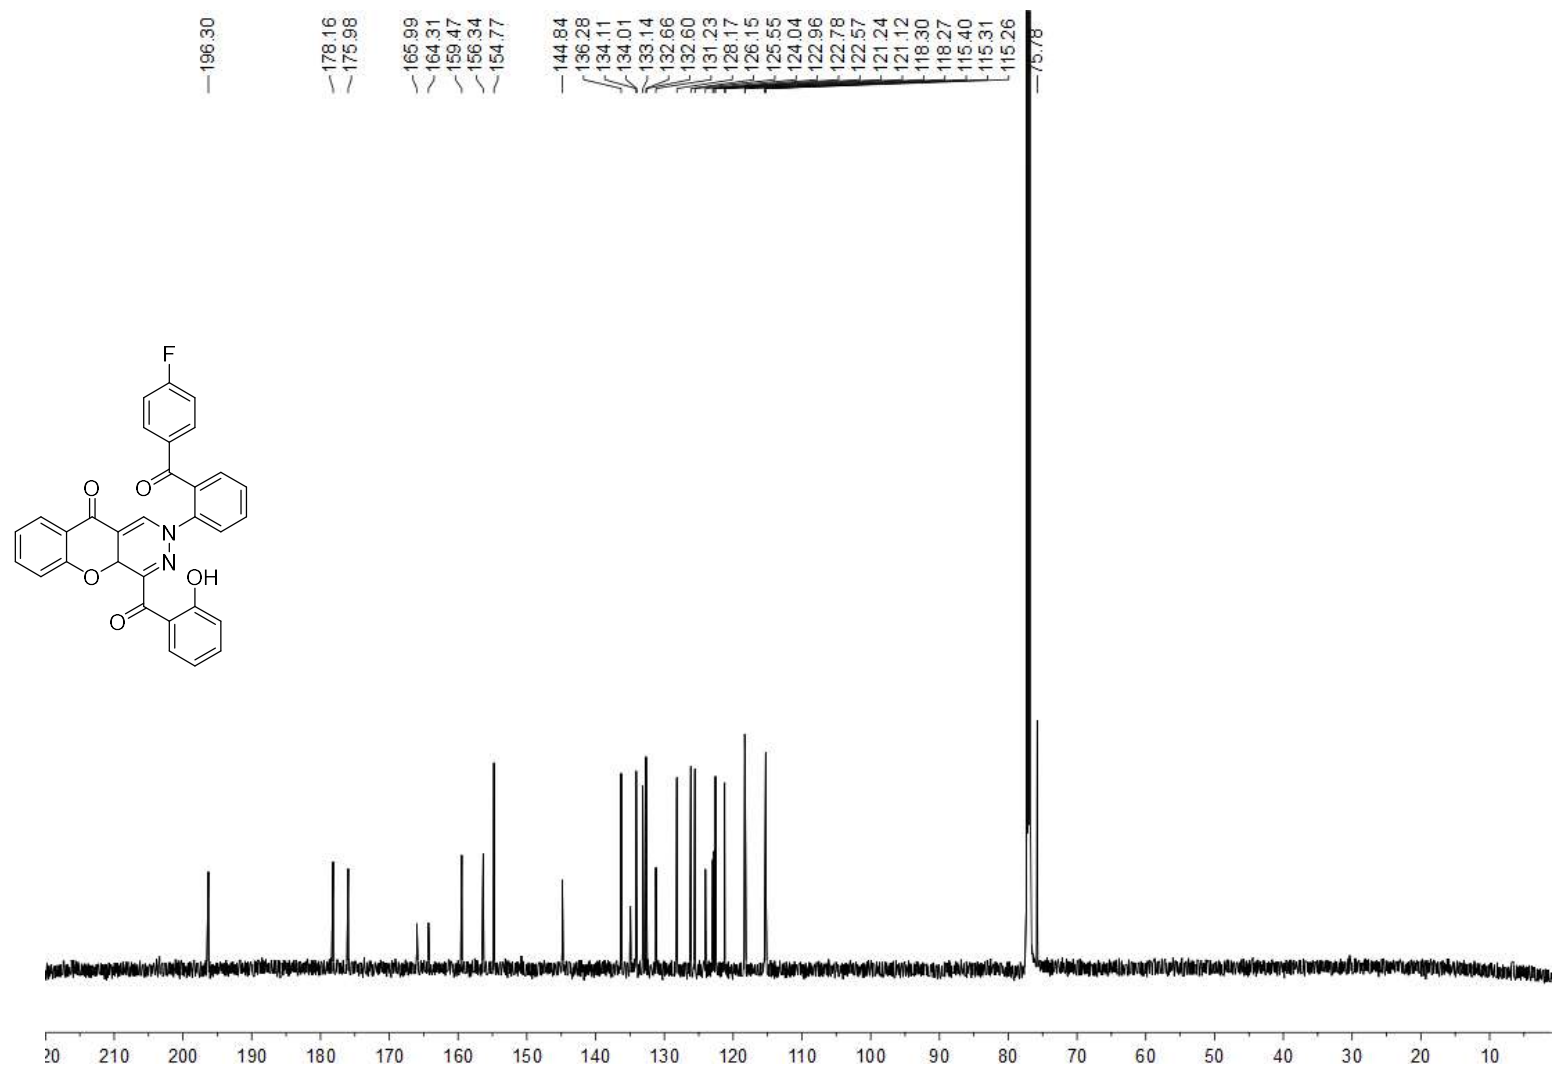

Figure S48. <sup>13</sup>C NMR (150 MHz, CDCl<sub>3</sub>) spectra of compound 3w



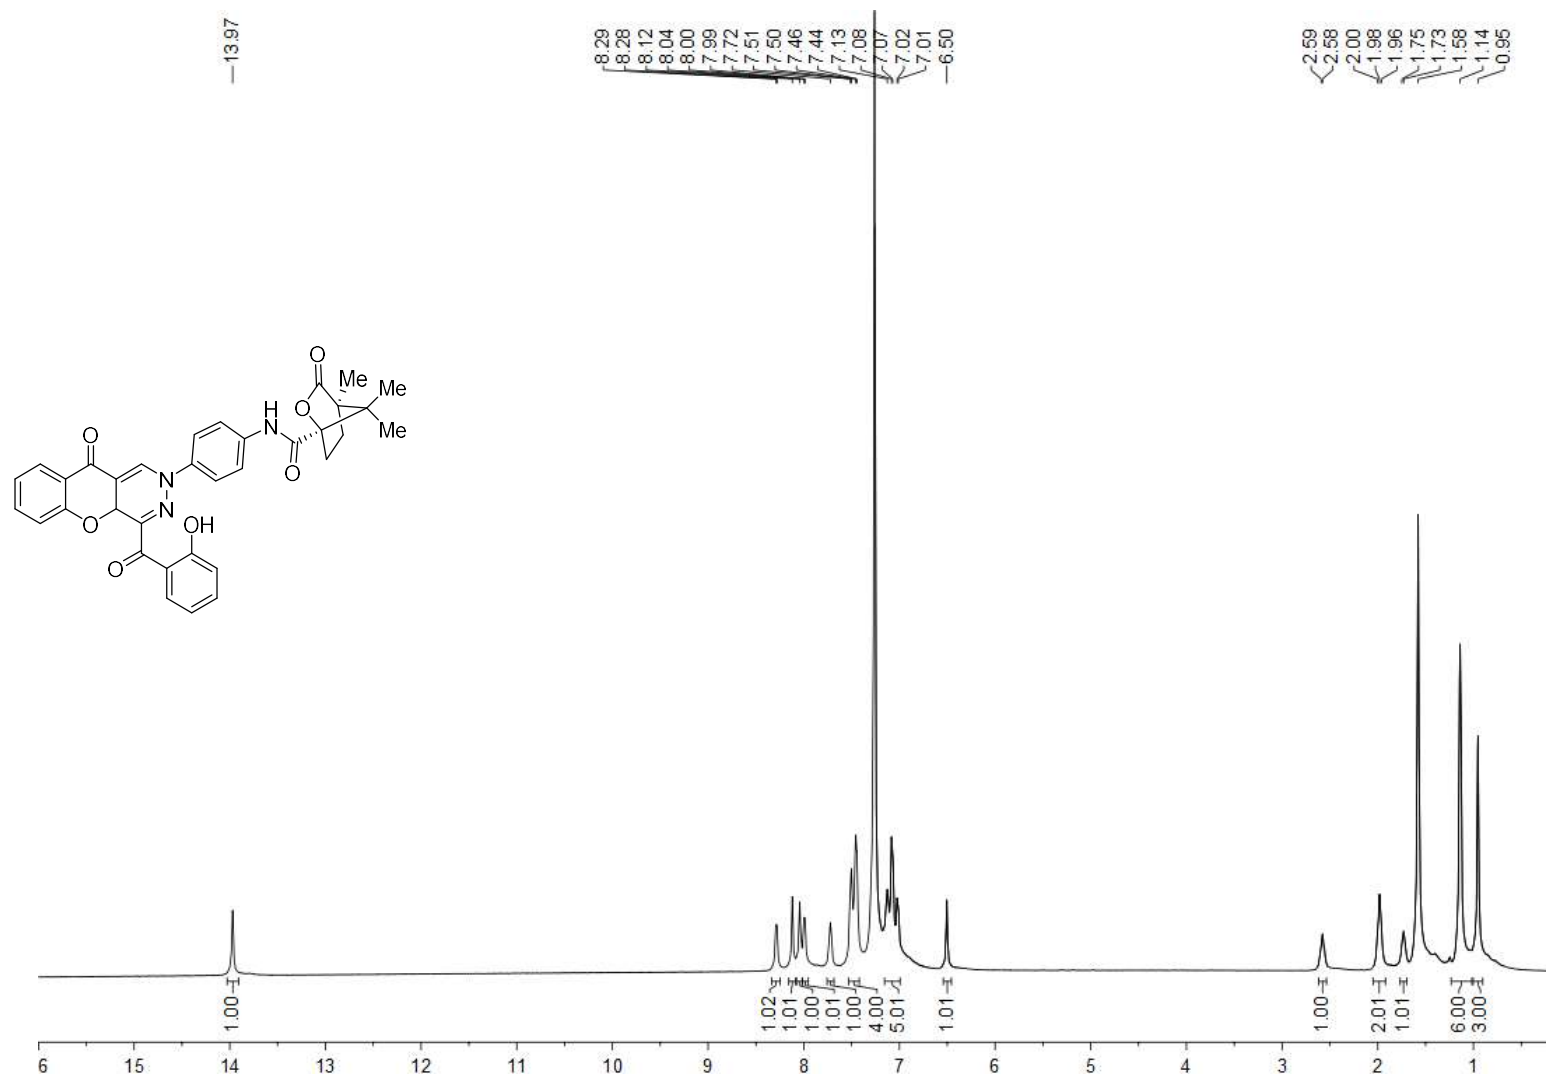

Figure S49.  $^1\text{H}$  NMR (600 MHz,  $\text{CDCl}_3$ ) spectra of compound 3x

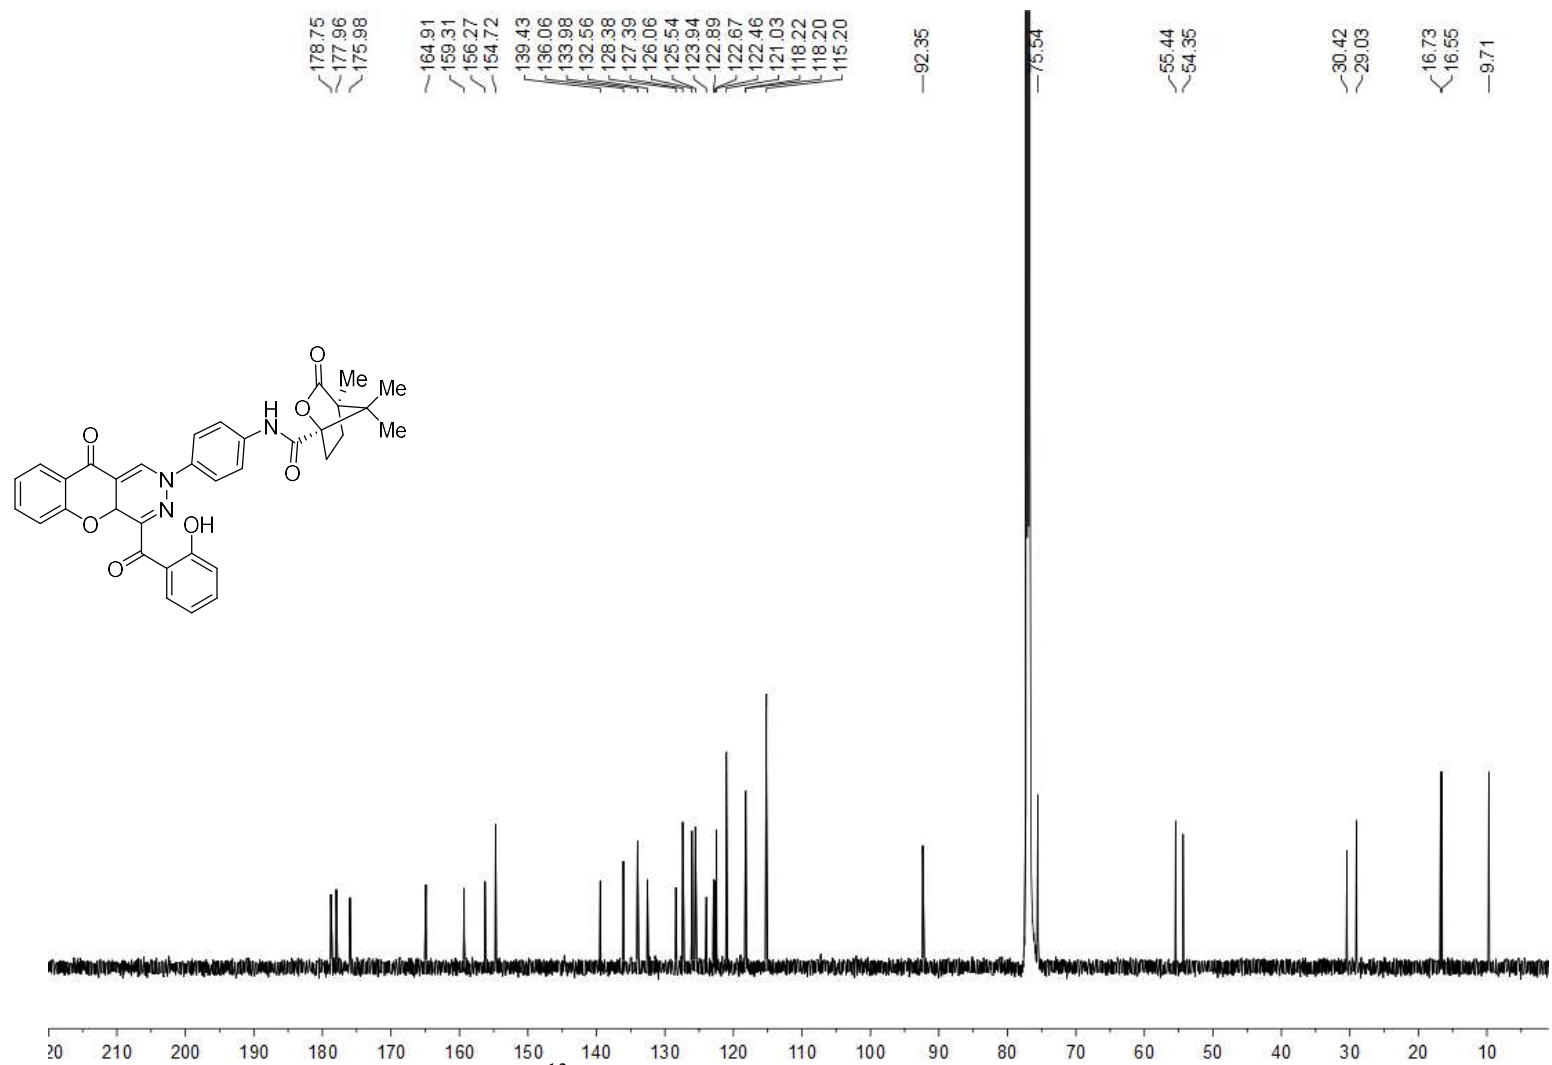

Figure S50. <sup>13</sup>C NMR (150 MHz, CDCl<sub>3</sub>) spectra of compound **3x**

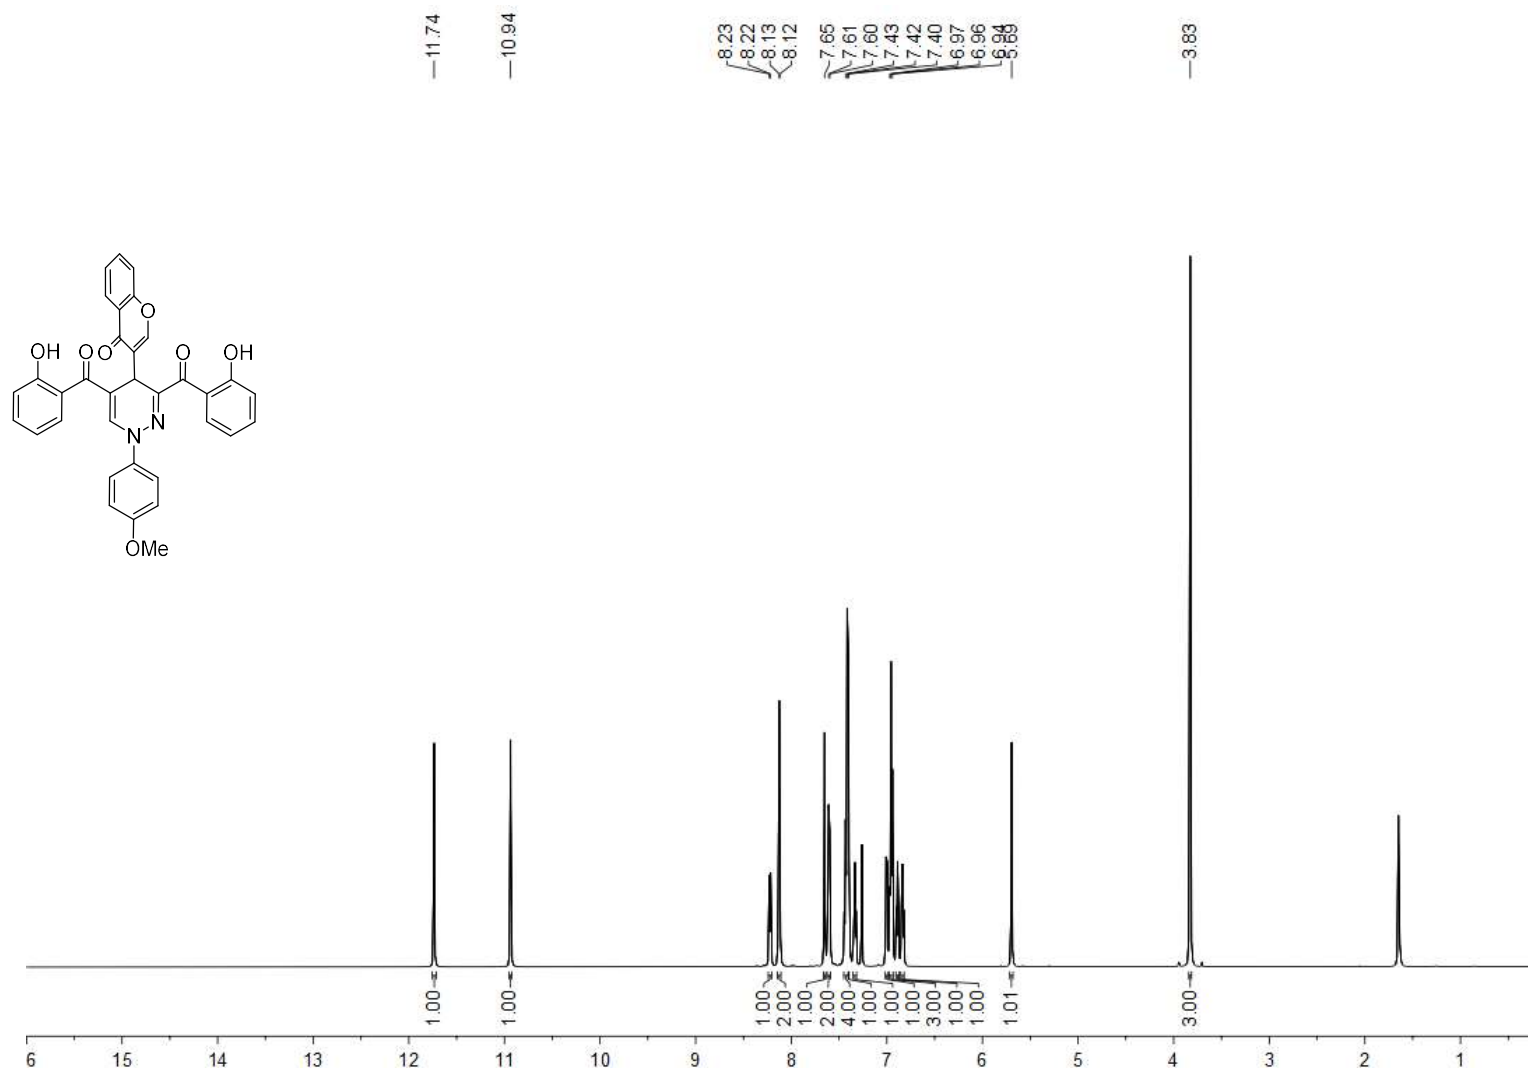

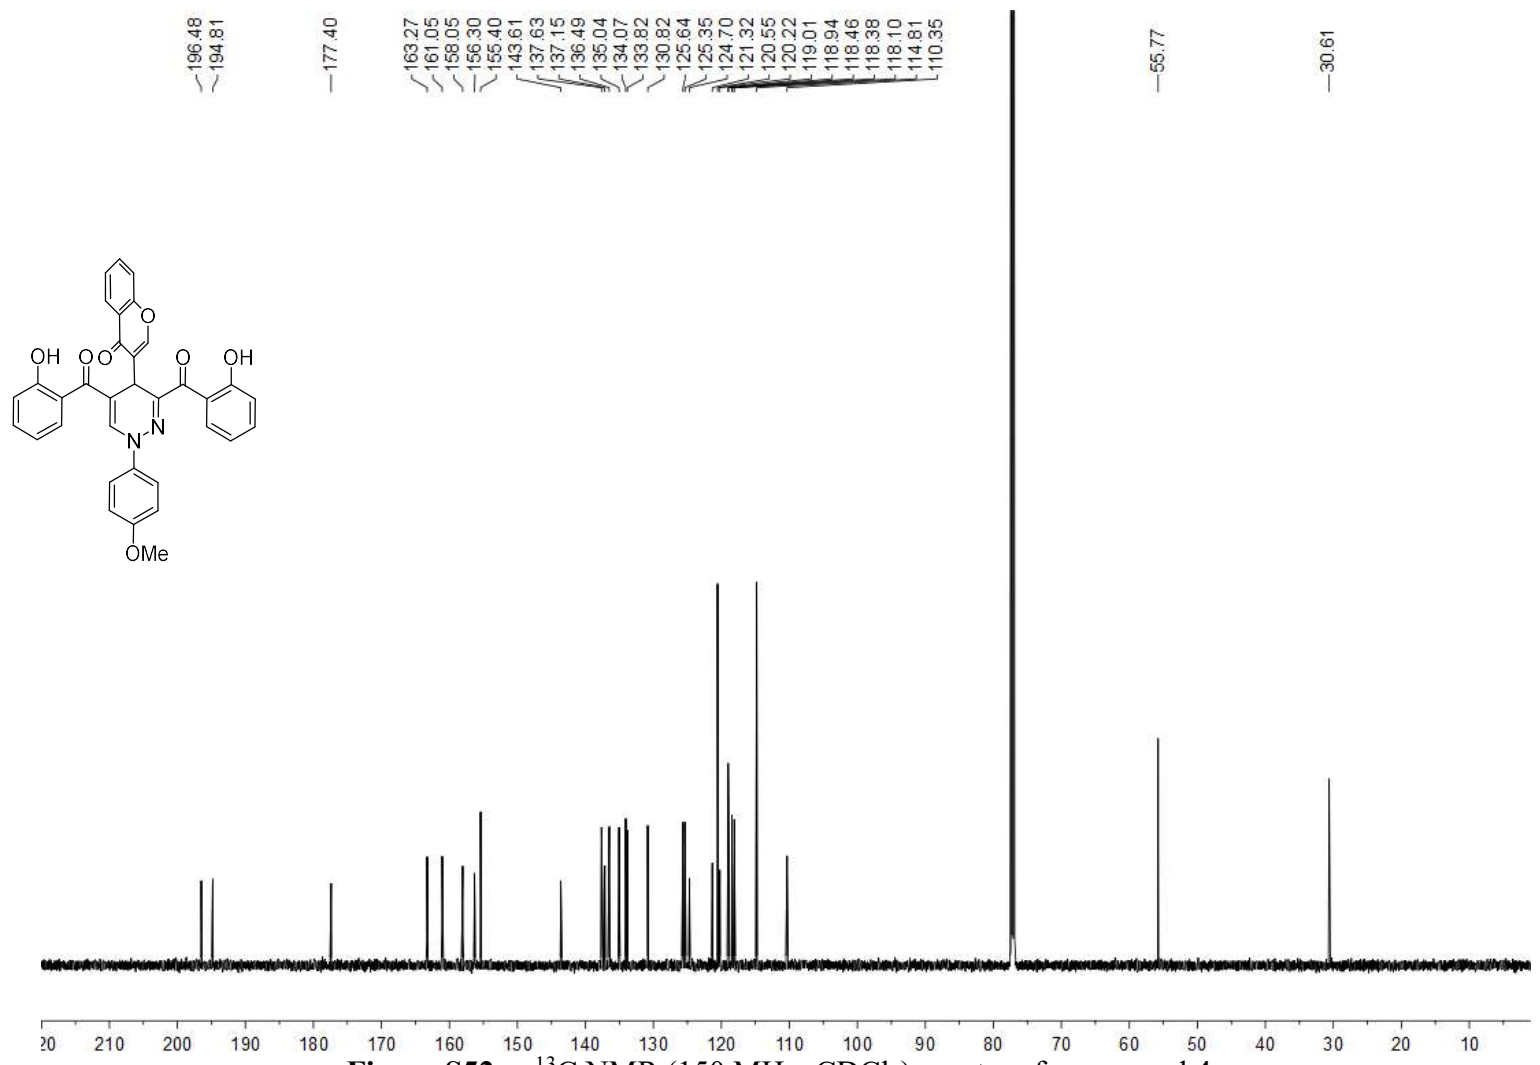

Figure S52. <sup>13</sup>C NMR (150 MHz, CDCl<sub>3</sub>) spectra of compound 4a

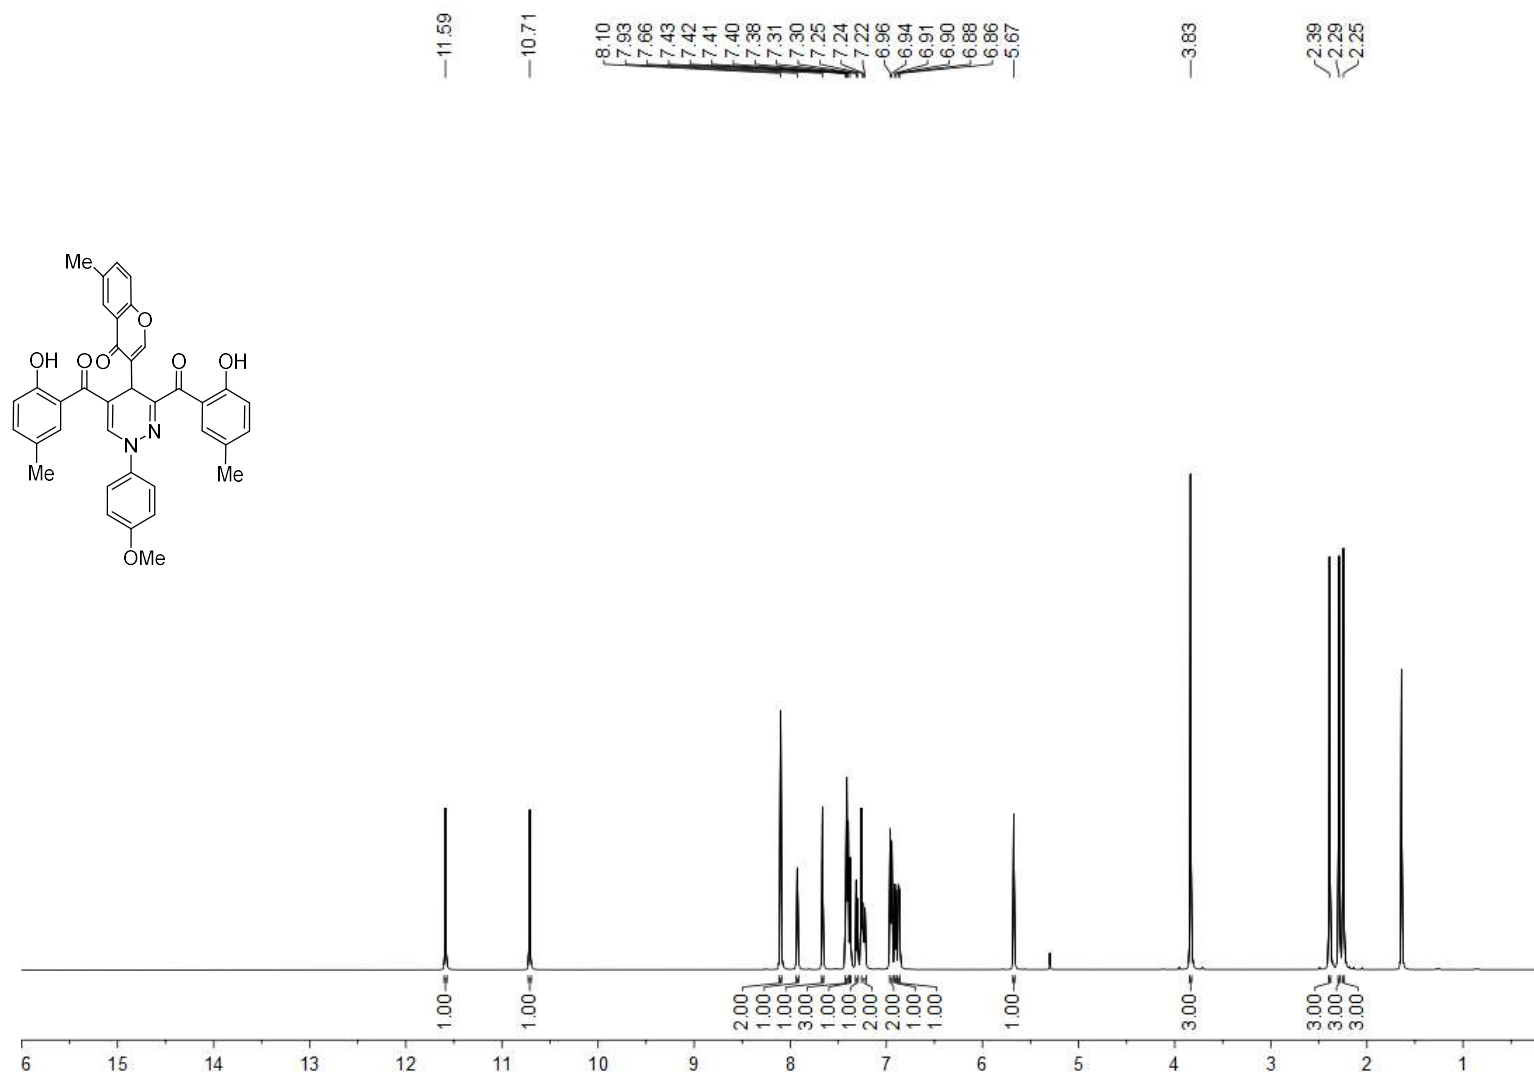

**Figure S53.** <sup>1</sup>H NMR (600 MHz, CDCl<sub>3</sub>) spectra of compound **4b**

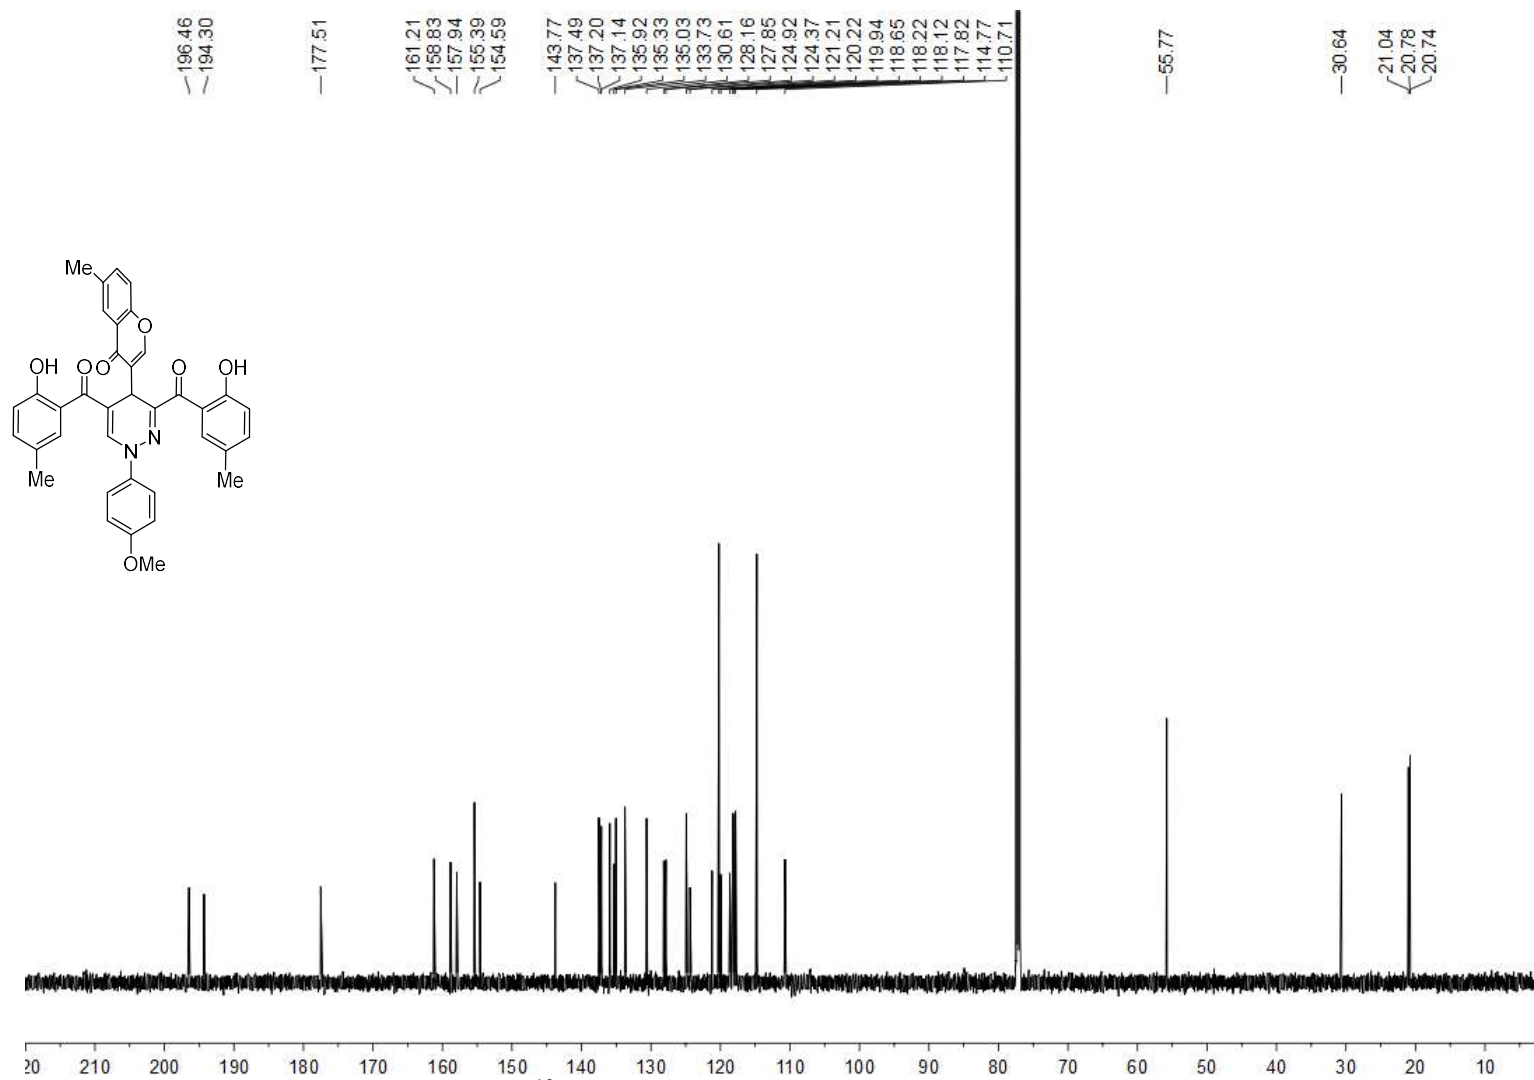

Figure S54. <sup>13</sup>C NMR (150 MHz, CDCl<sub>3</sub>) spectra of compound 4b

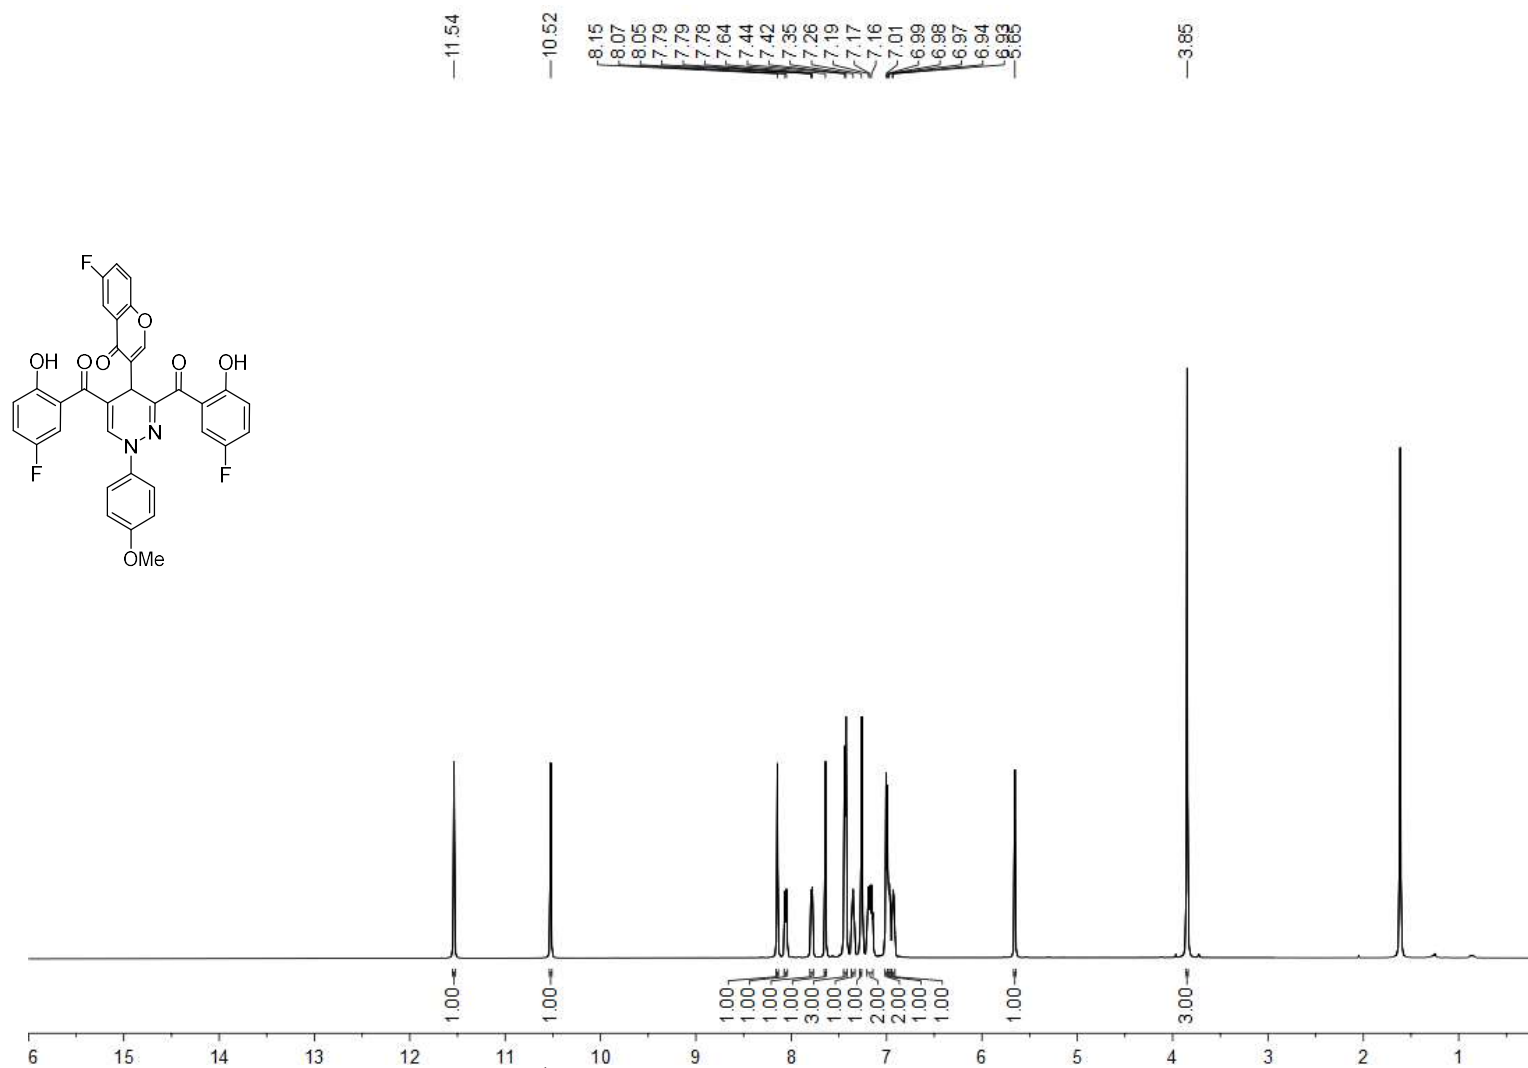

**Figure S55.** <sup>1</sup>H NMR (600 MHz, CDCl<sub>3</sub>) spectra of compound **4c**

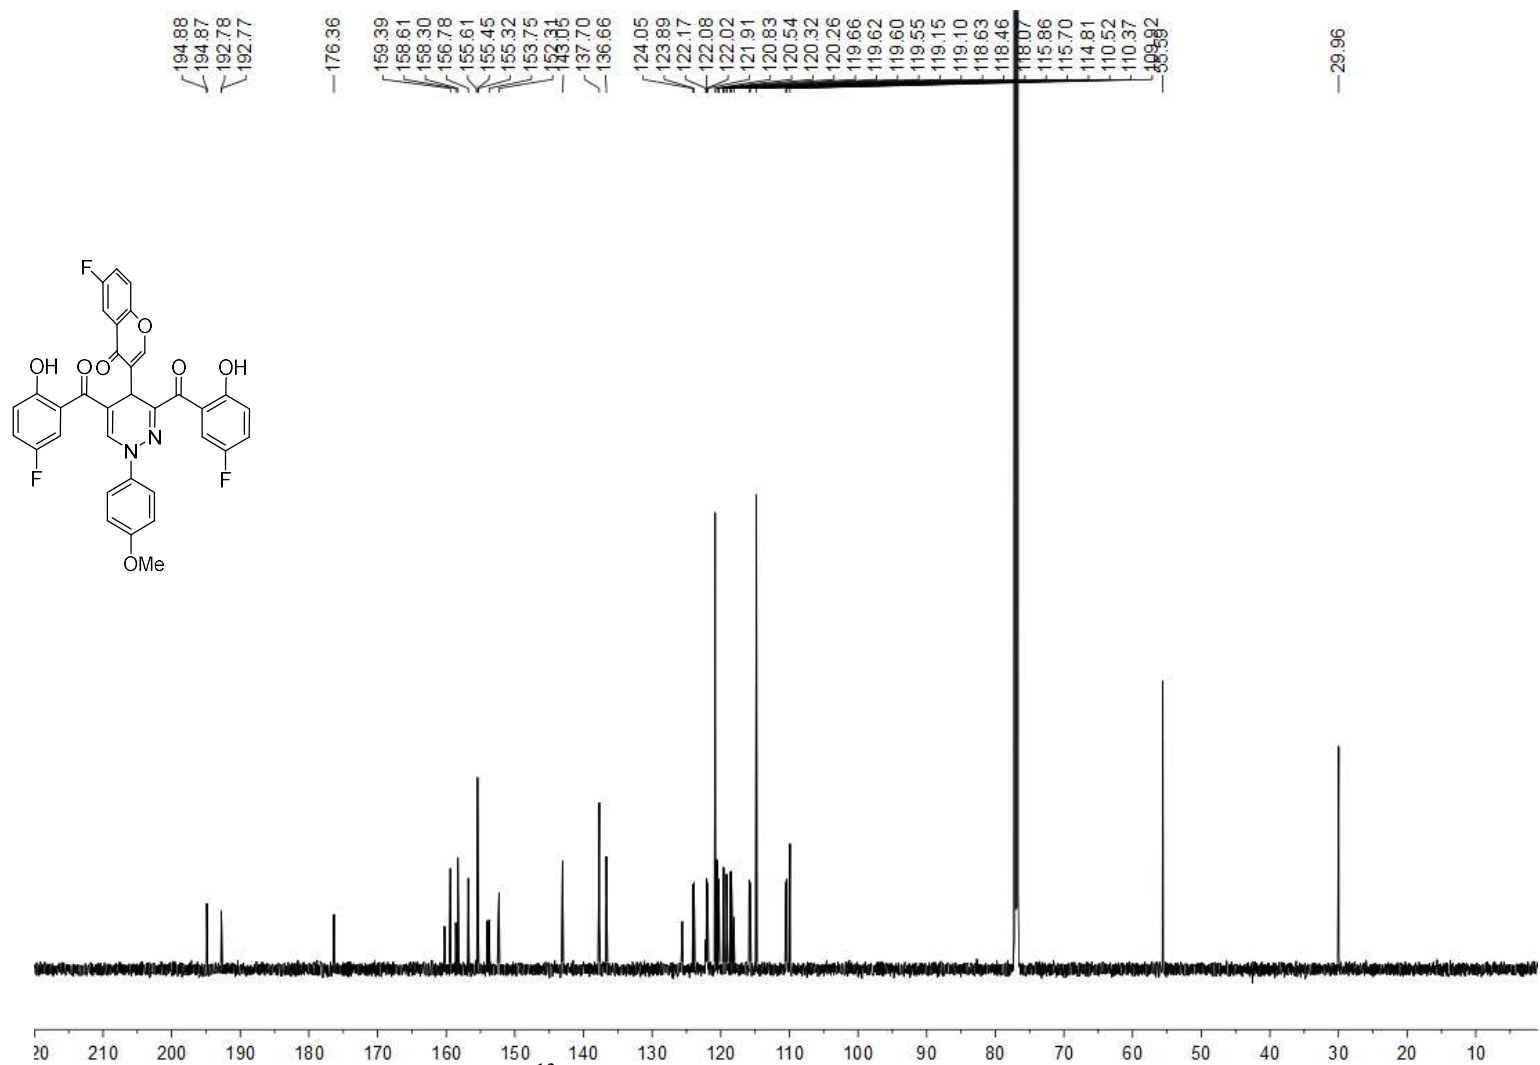

Figure S56. <sup>13</sup>C NMR (150 MHz, CDCl<sub>3</sub>) spectra of compound 4c



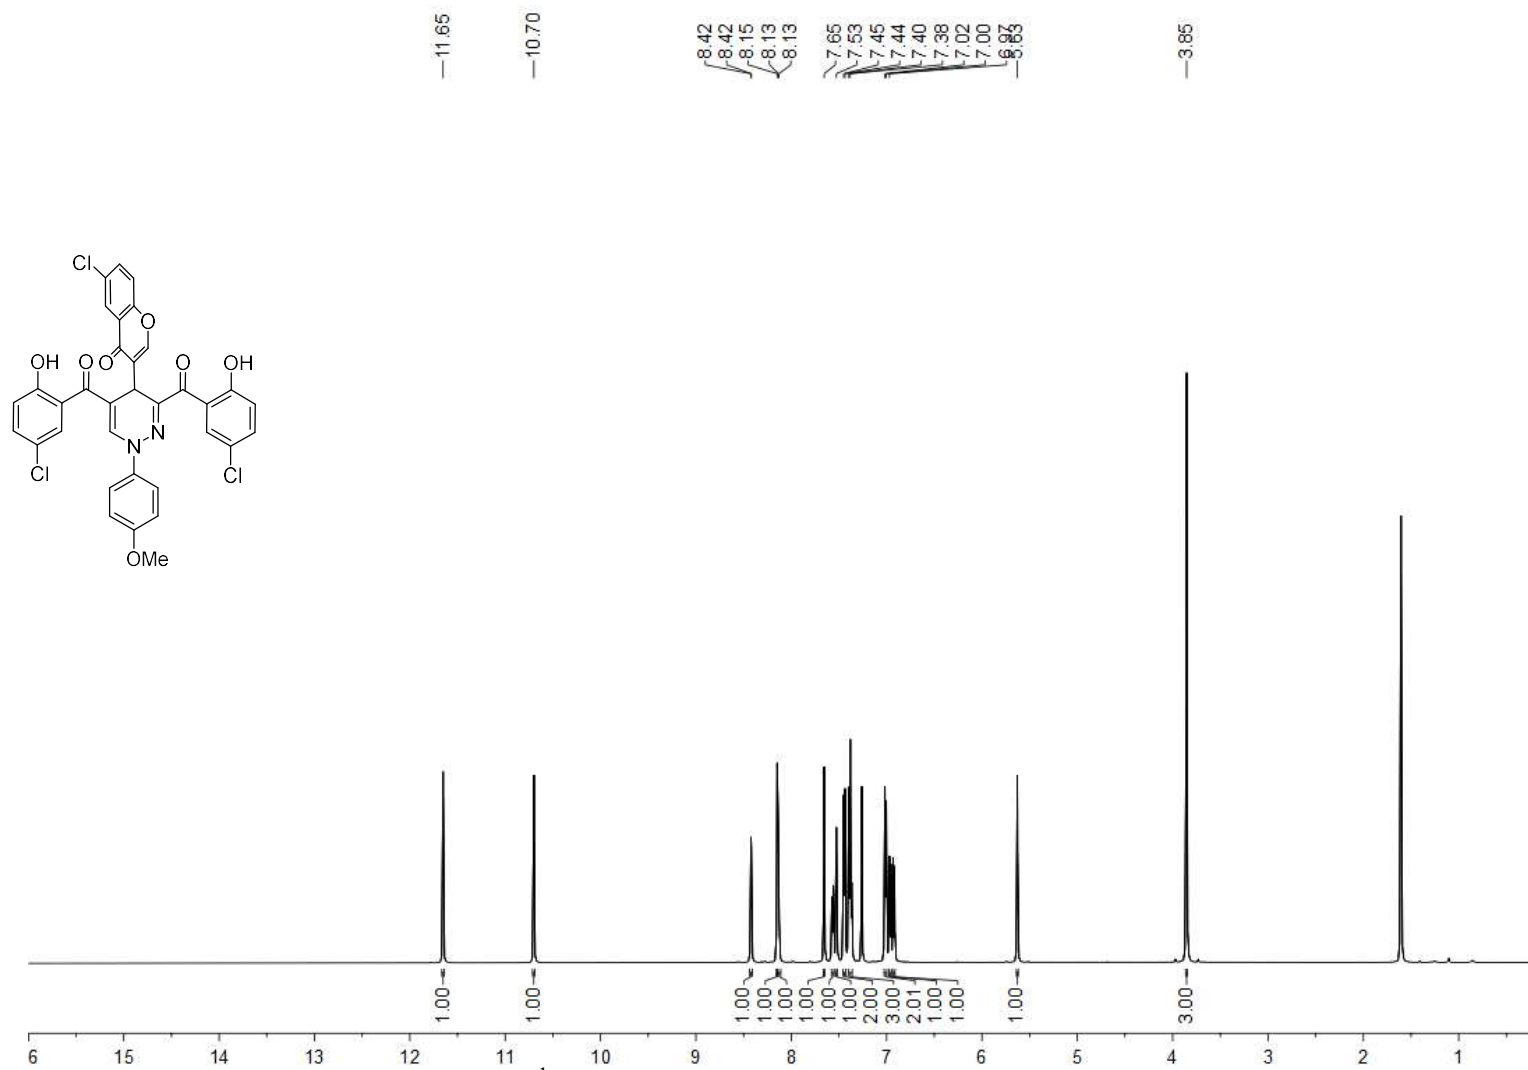

**Figure S57.**  $^1\text{H NMR}$  (600 MHz,  $\text{CDCl}_3$ ) spectra of compound **4d**

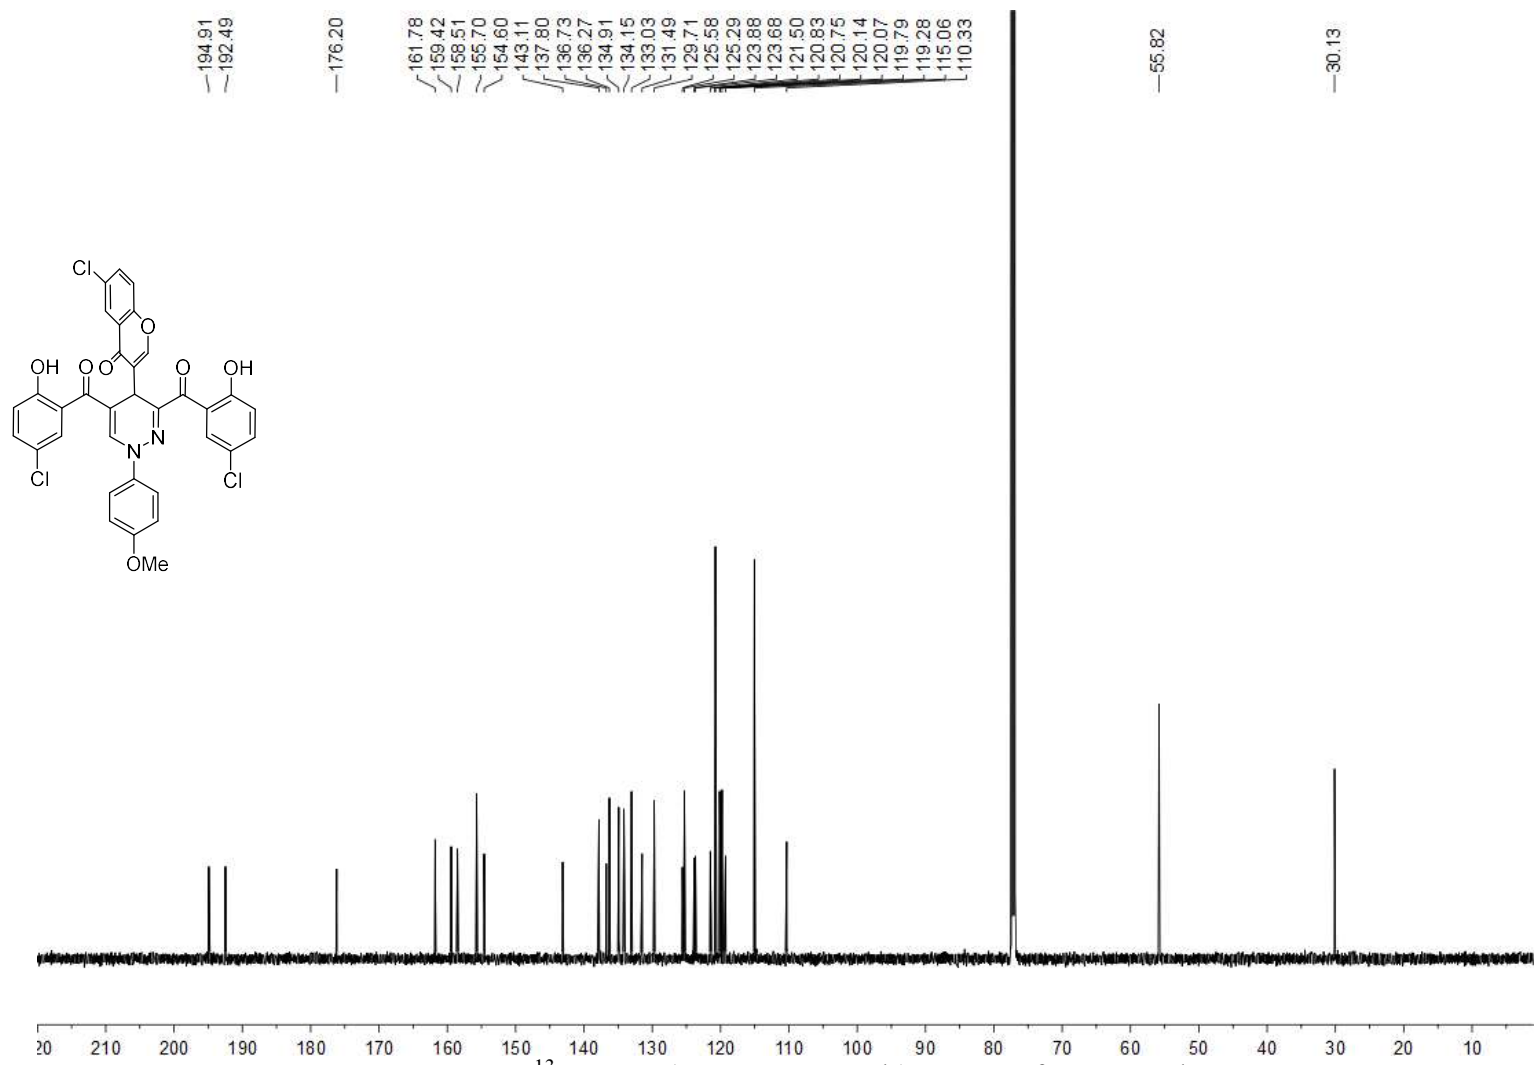

Figure S58. <sup>13</sup>C NMR (150 MHz, CDCl<sub>3</sub>) spectra of compound 4d

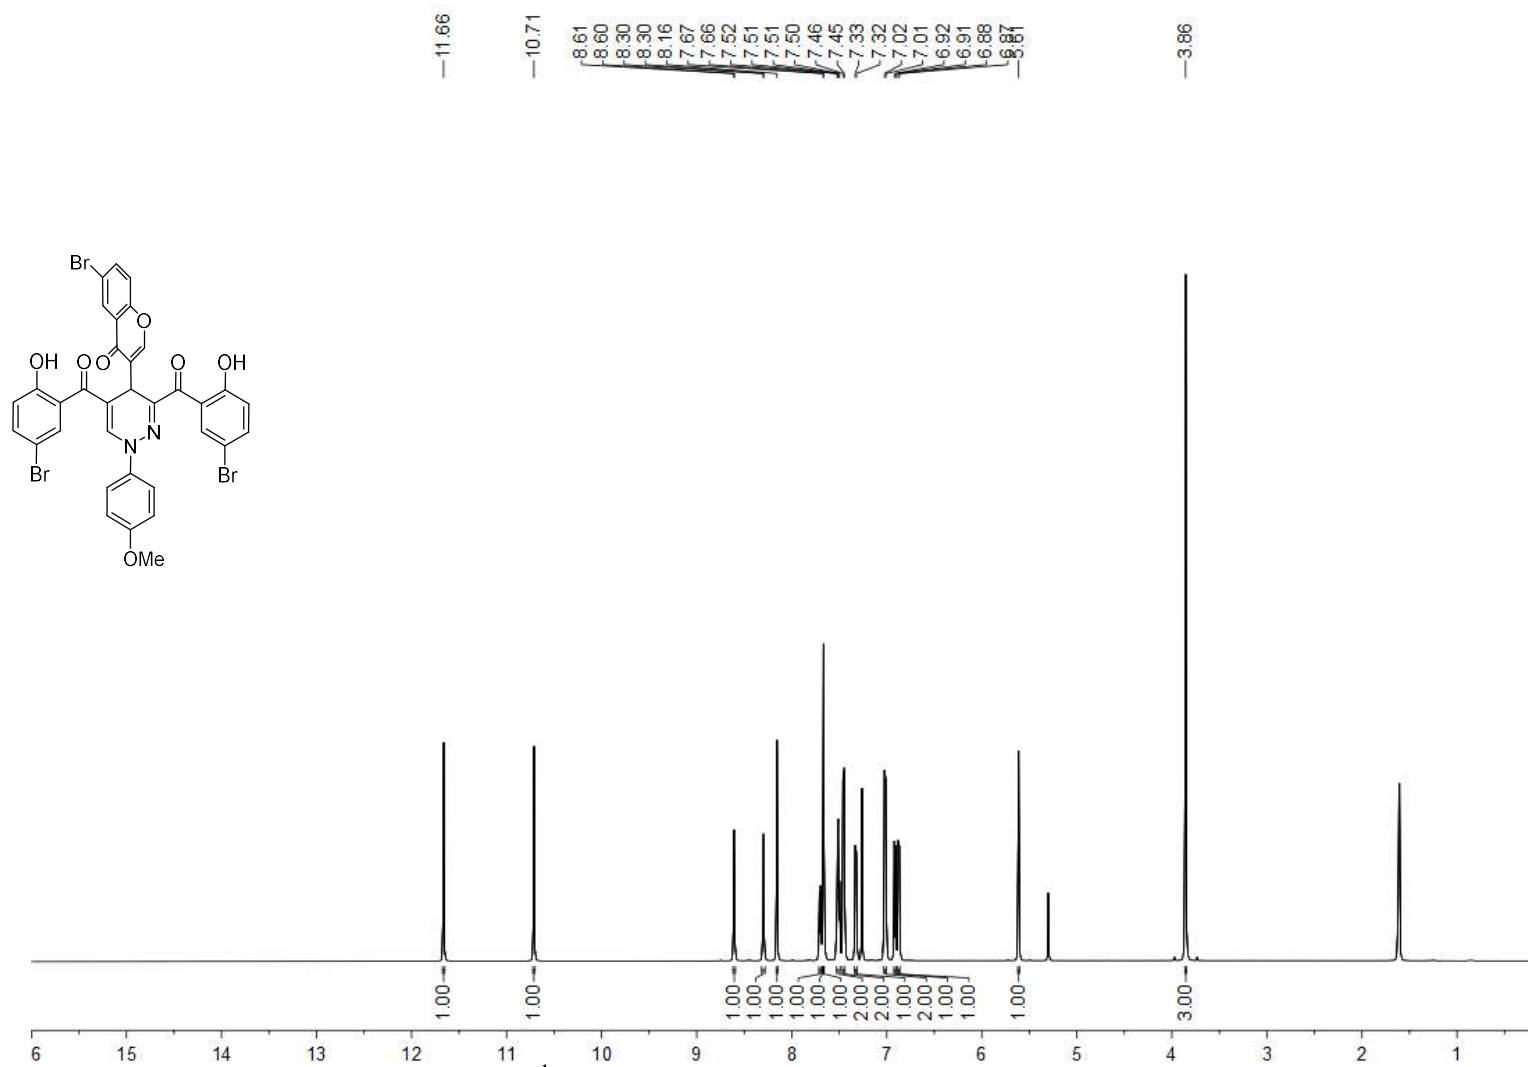

Figure S59. <sup>1</sup>H NMR (600 MHz, CDCl<sub>3</sub>) spectra of compound 4e

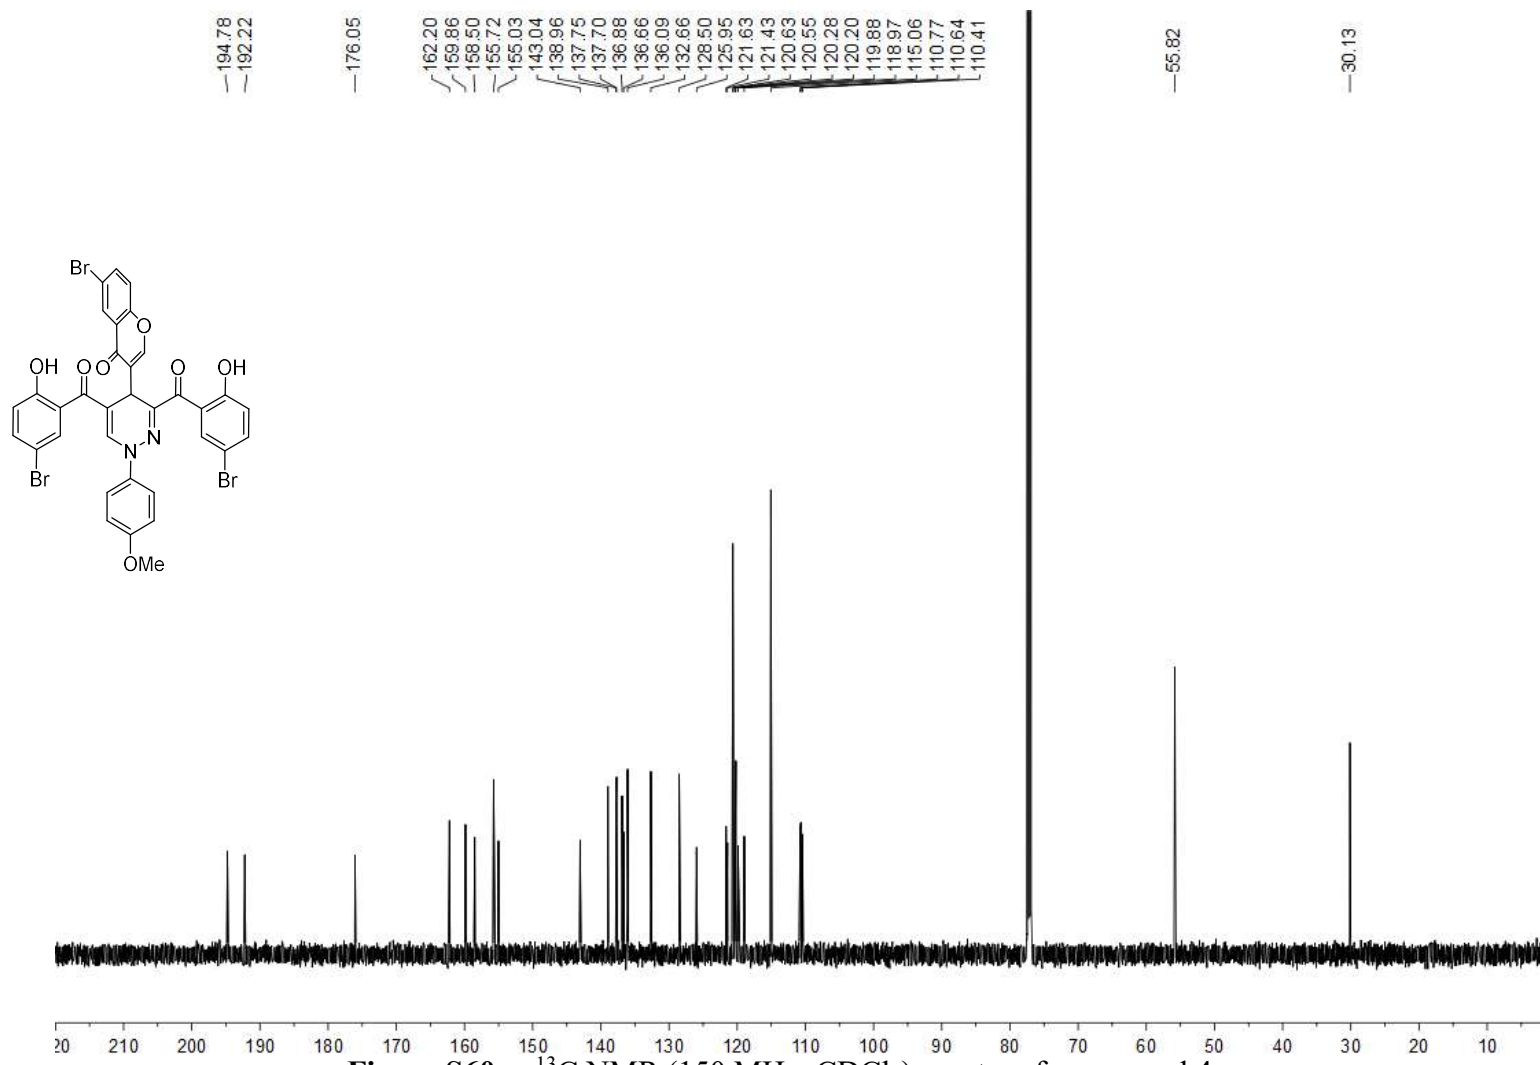

Figure S60. <sup>13</sup>C NMR (150 MHz, CDCl<sub>3</sub>) spectra of compound 4e

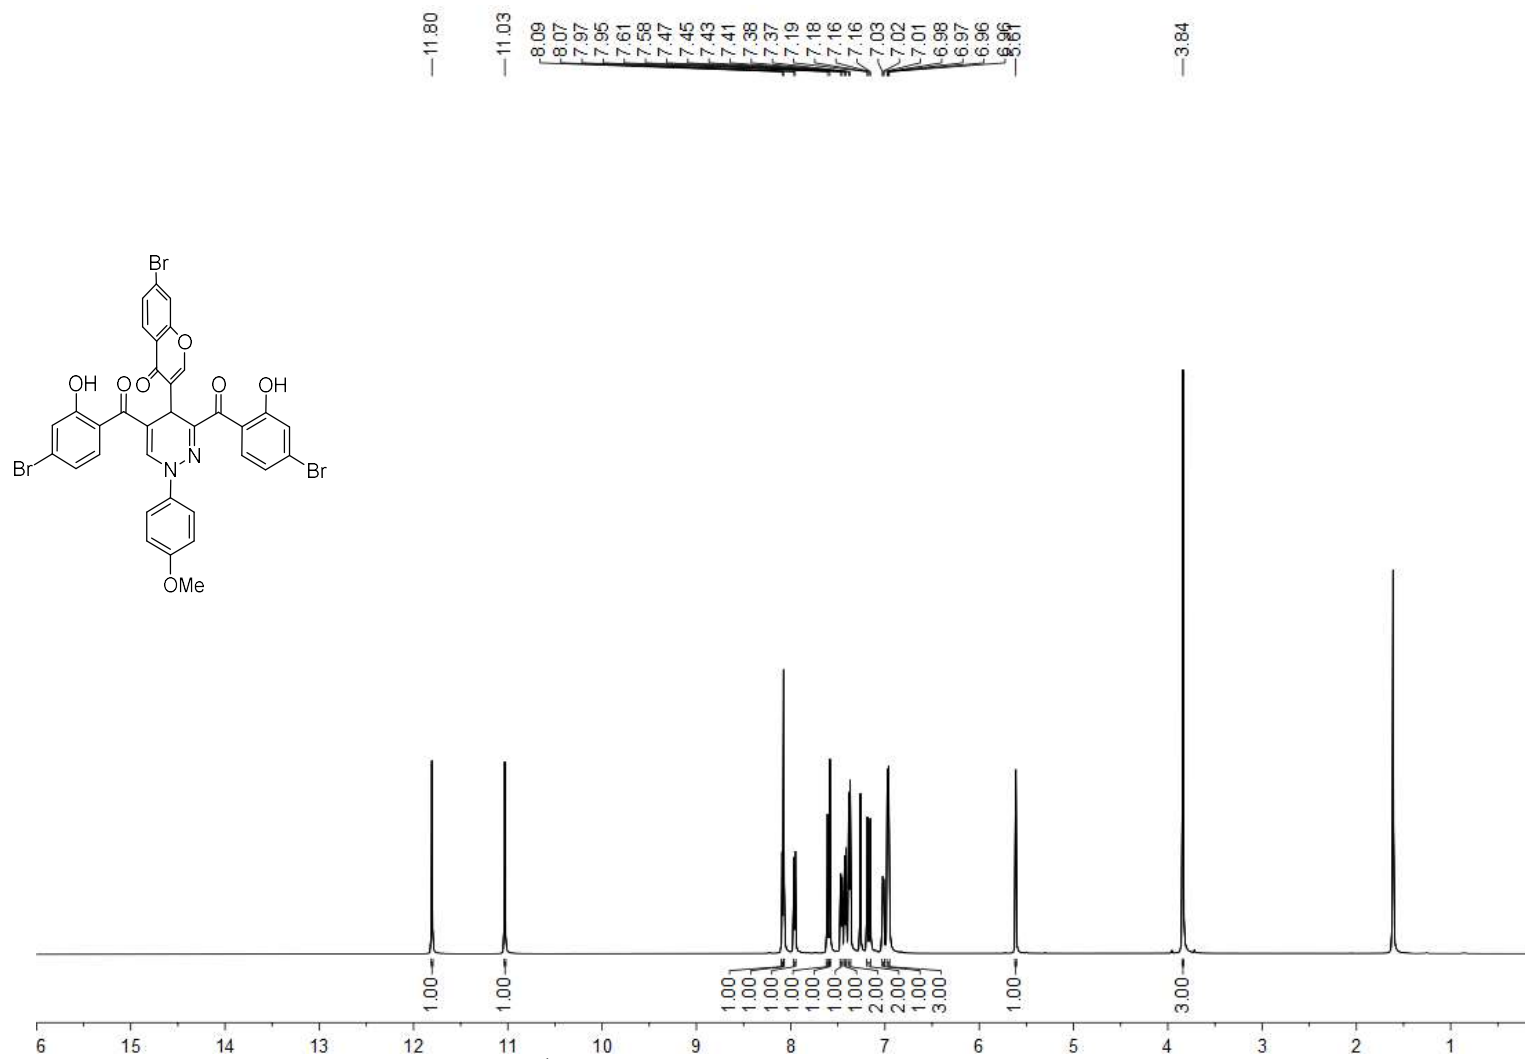

Figure S61. <sup>1</sup>H NMR (600 MHz, CDCl<sub>3</sub>) spectra of compound 4f

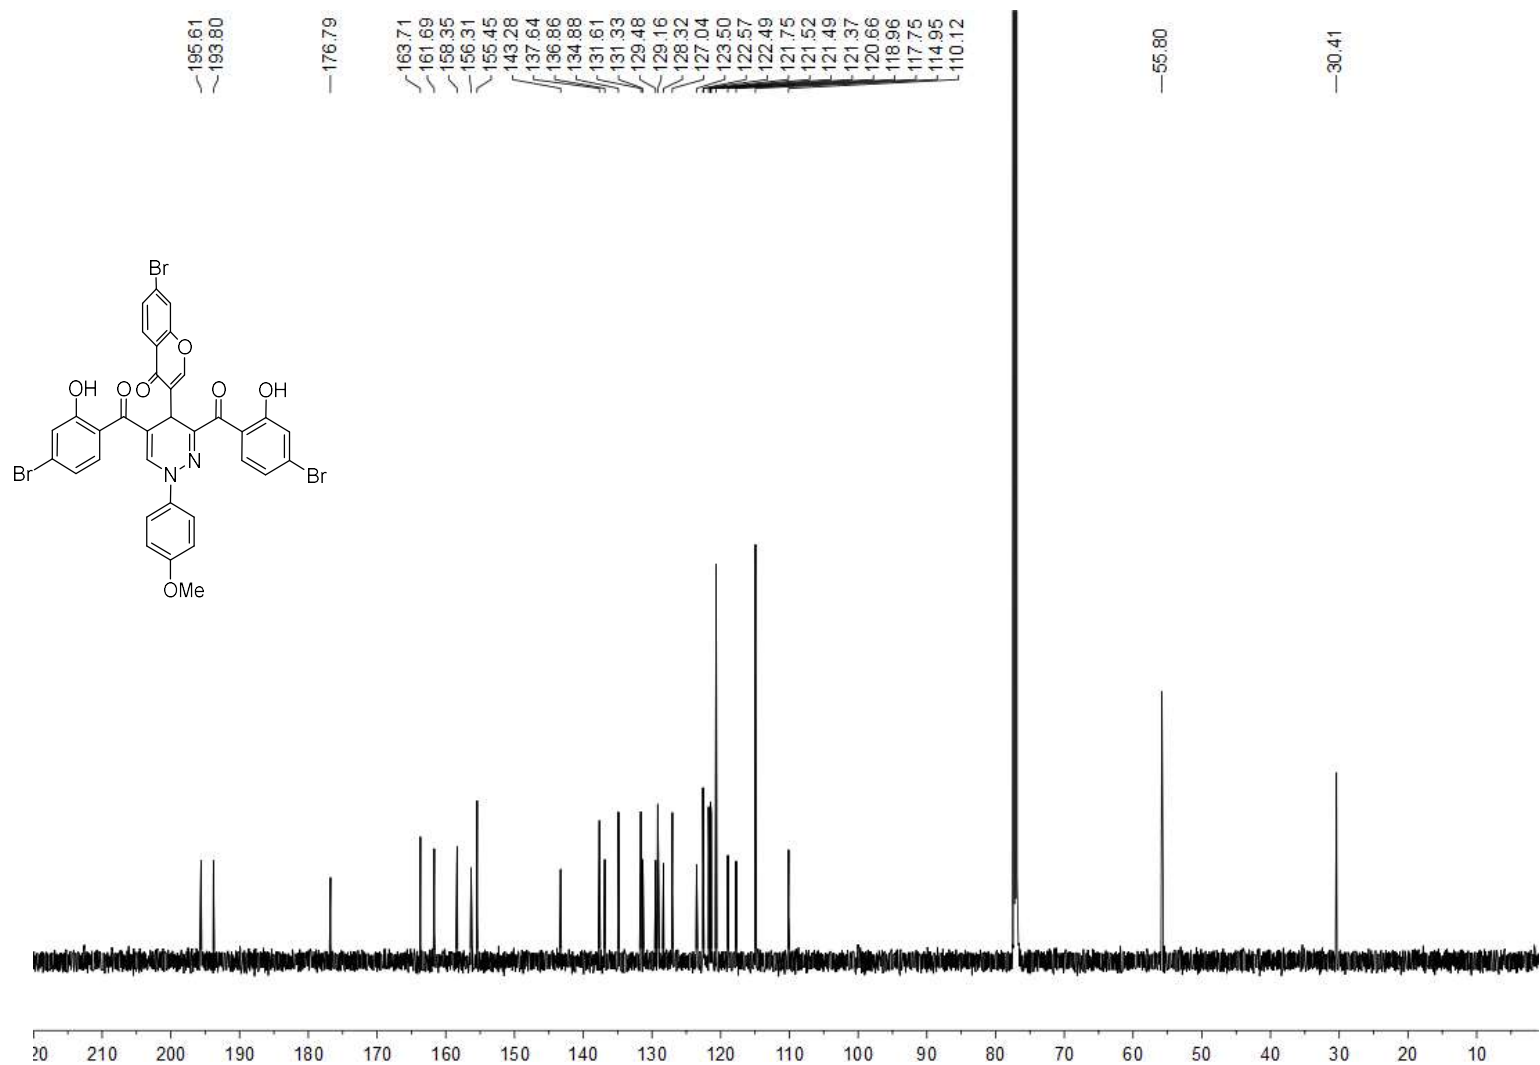

Figure S62. <sup>13</sup>C NMR (150 MHz, CDCl<sub>3</sub>) spectra of compound 4f

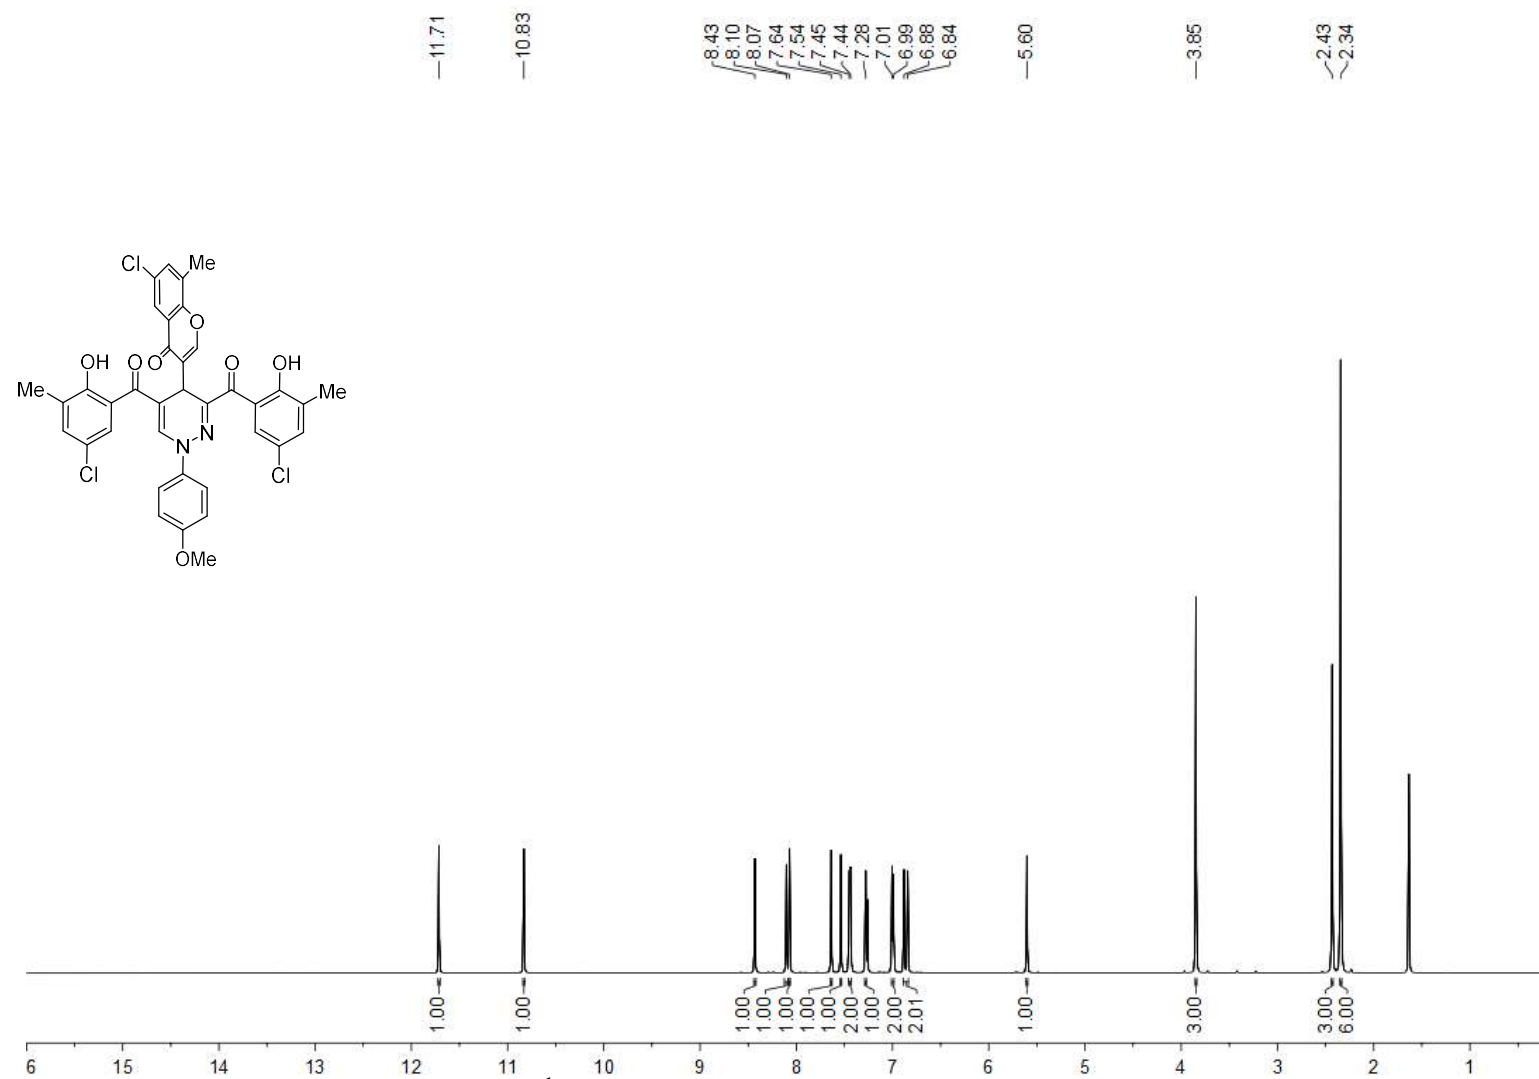

**Figure S63.** <sup>1</sup>H NMR (600 MHz, CDCl<sub>3</sub>) spectra of compound **4g**

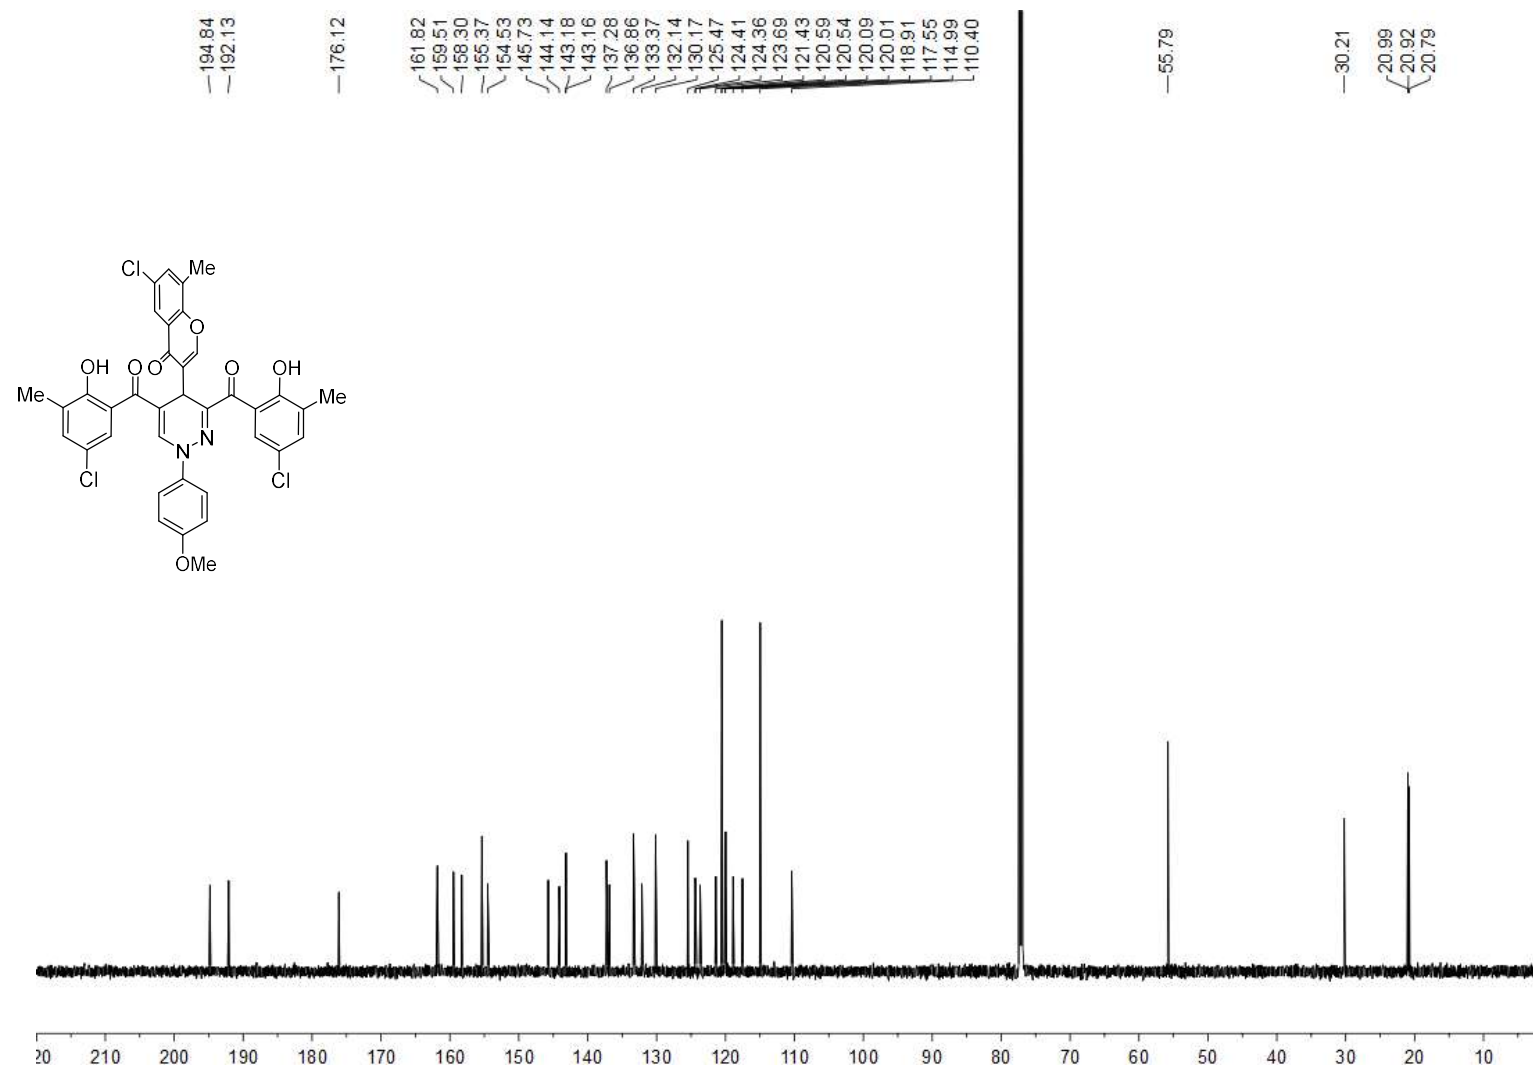

Figure S64. <sup>13</sup>C NMR (150 MHz, CDCl<sub>3</sub>) spectra of compound 4g



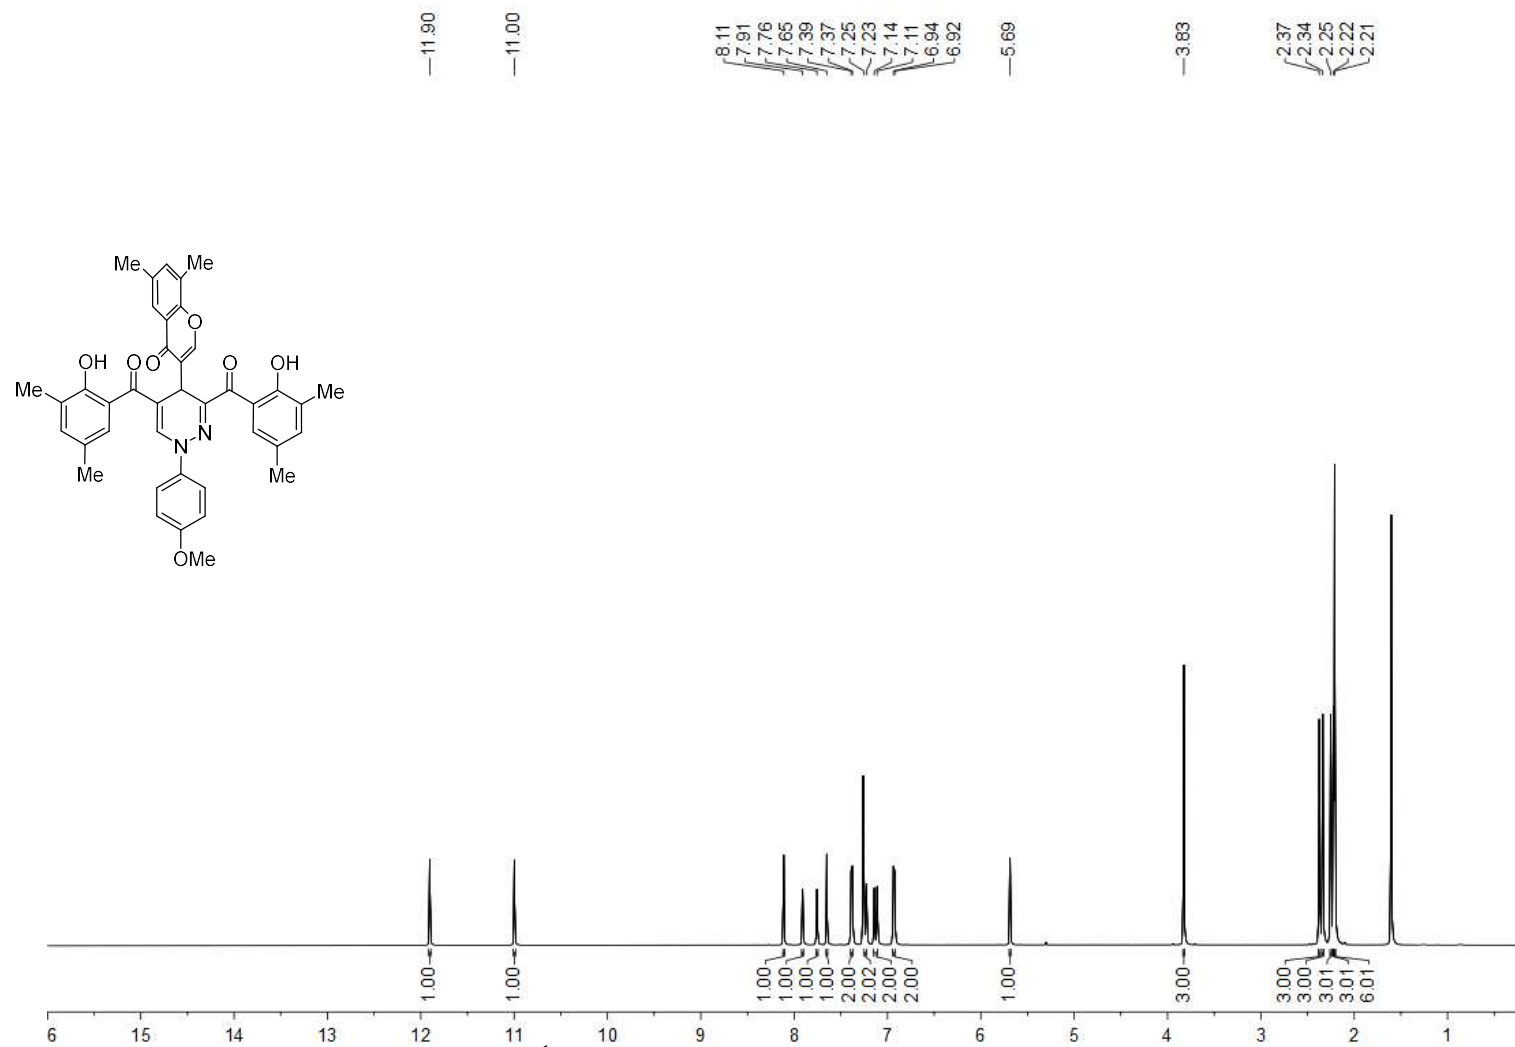

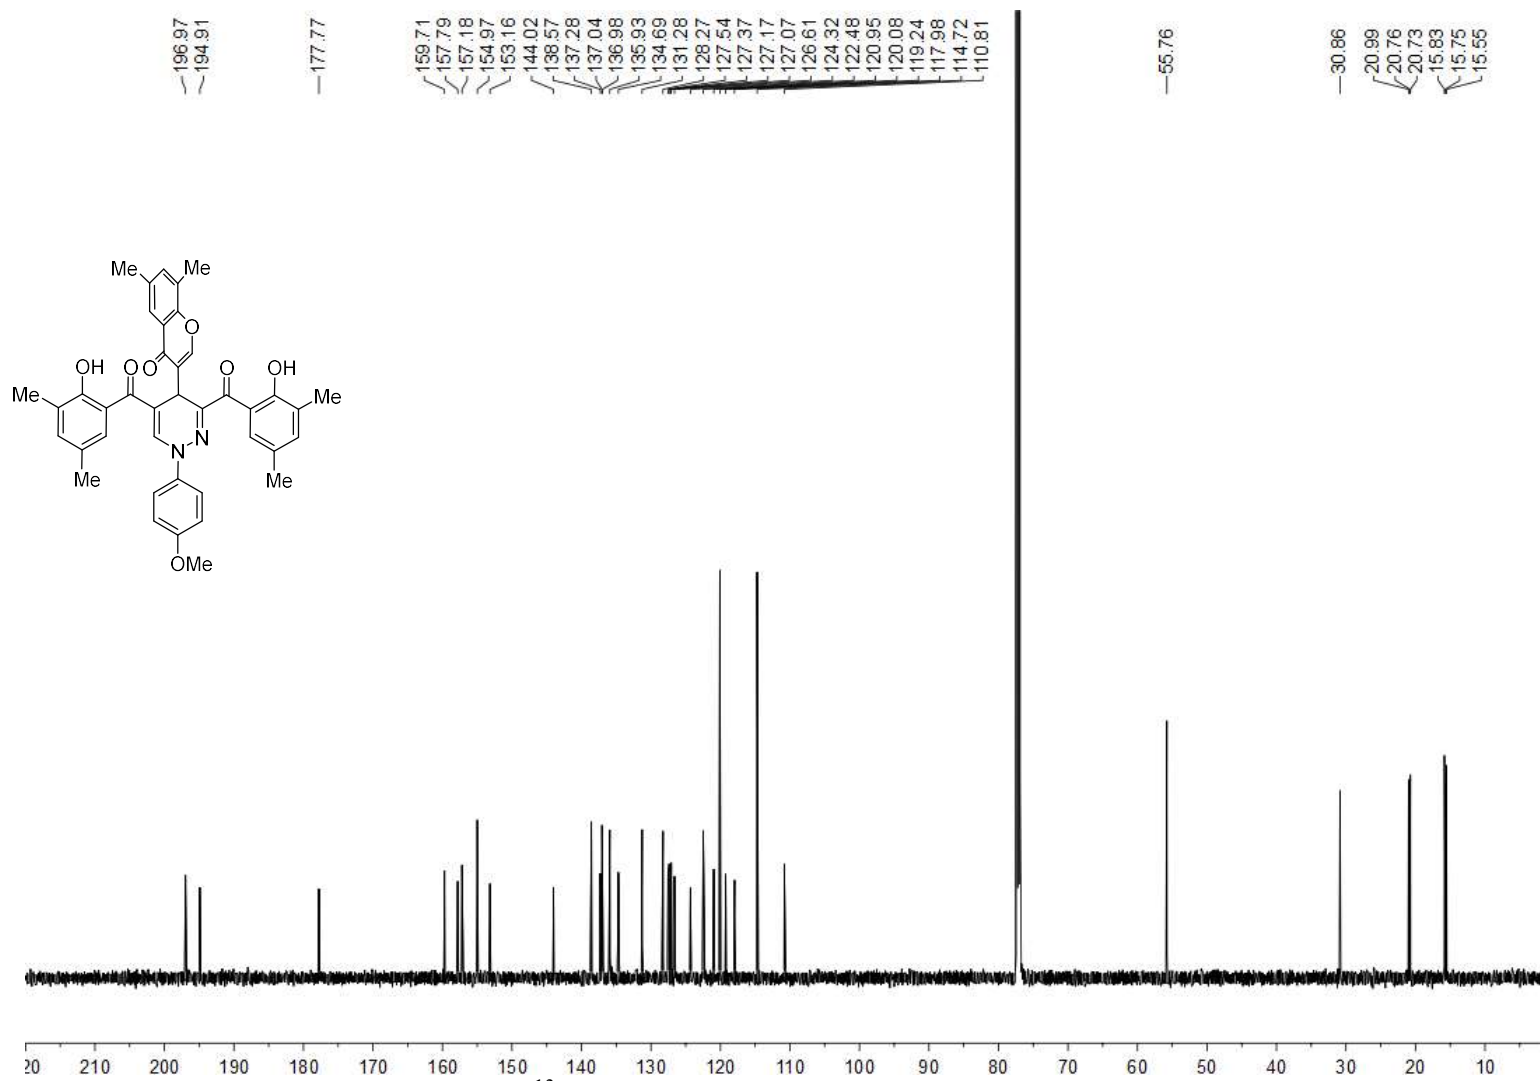

Figure S66. <sup>13</sup>C NMR (150 MHz, CDCl<sub>3</sub>) spectra of compound 4h

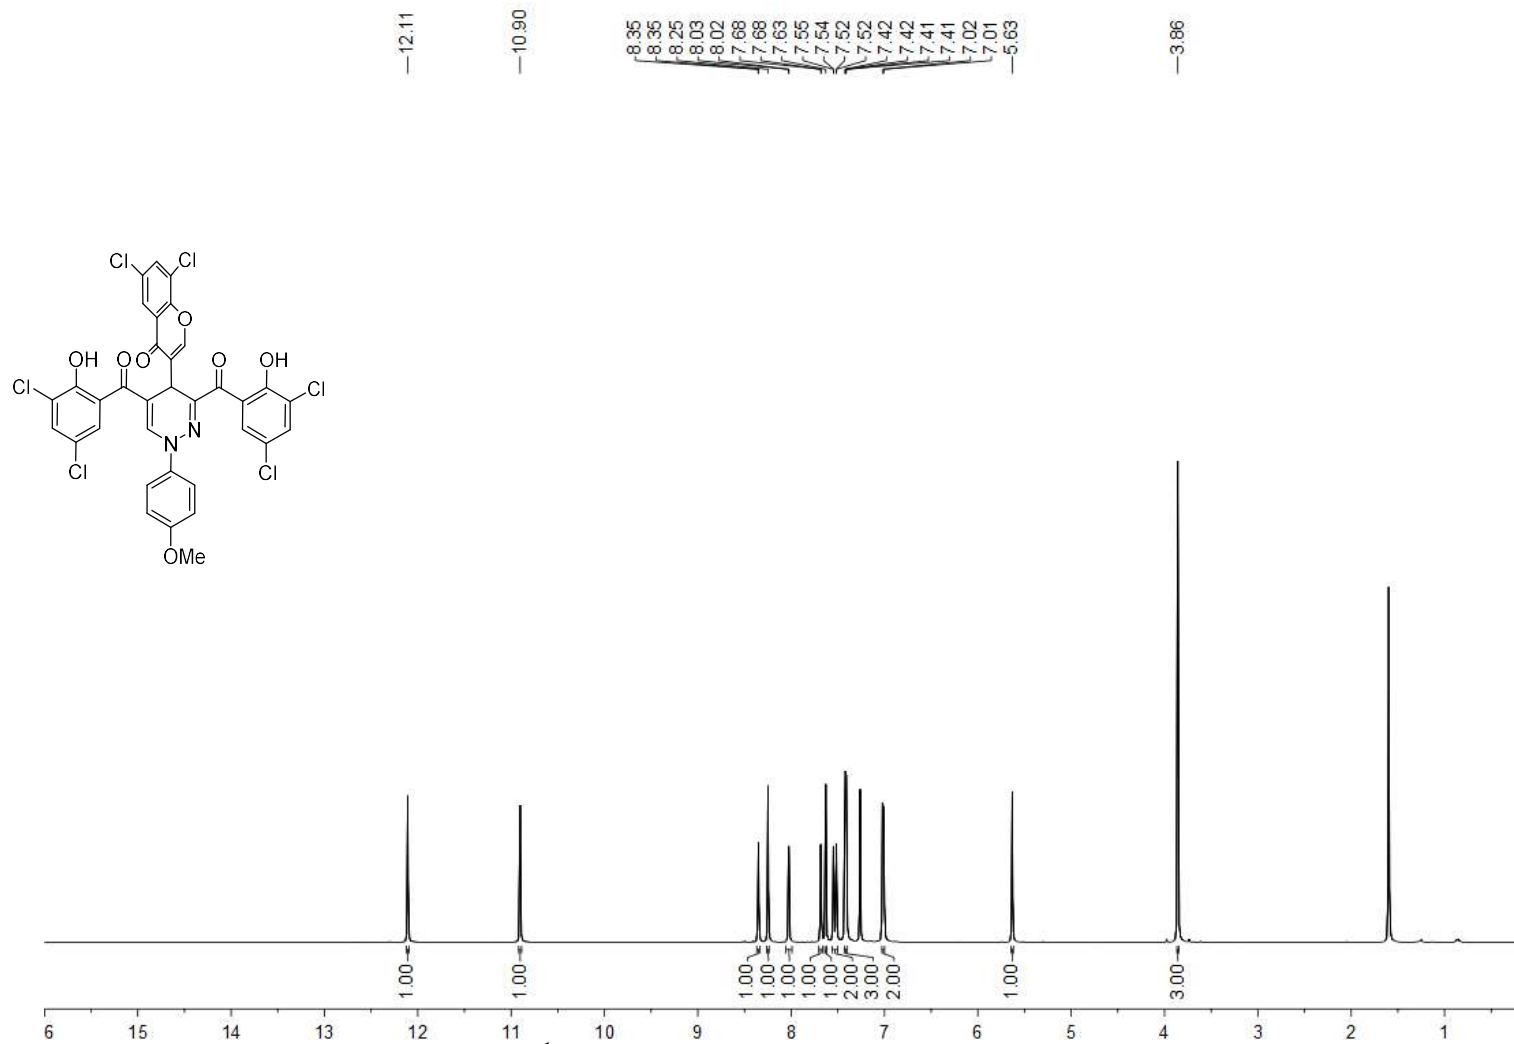

**Figure S67.** <sup>1</sup>H NMR (600 MHz, CDCl<sub>3</sub>) spectra of compound **4i**

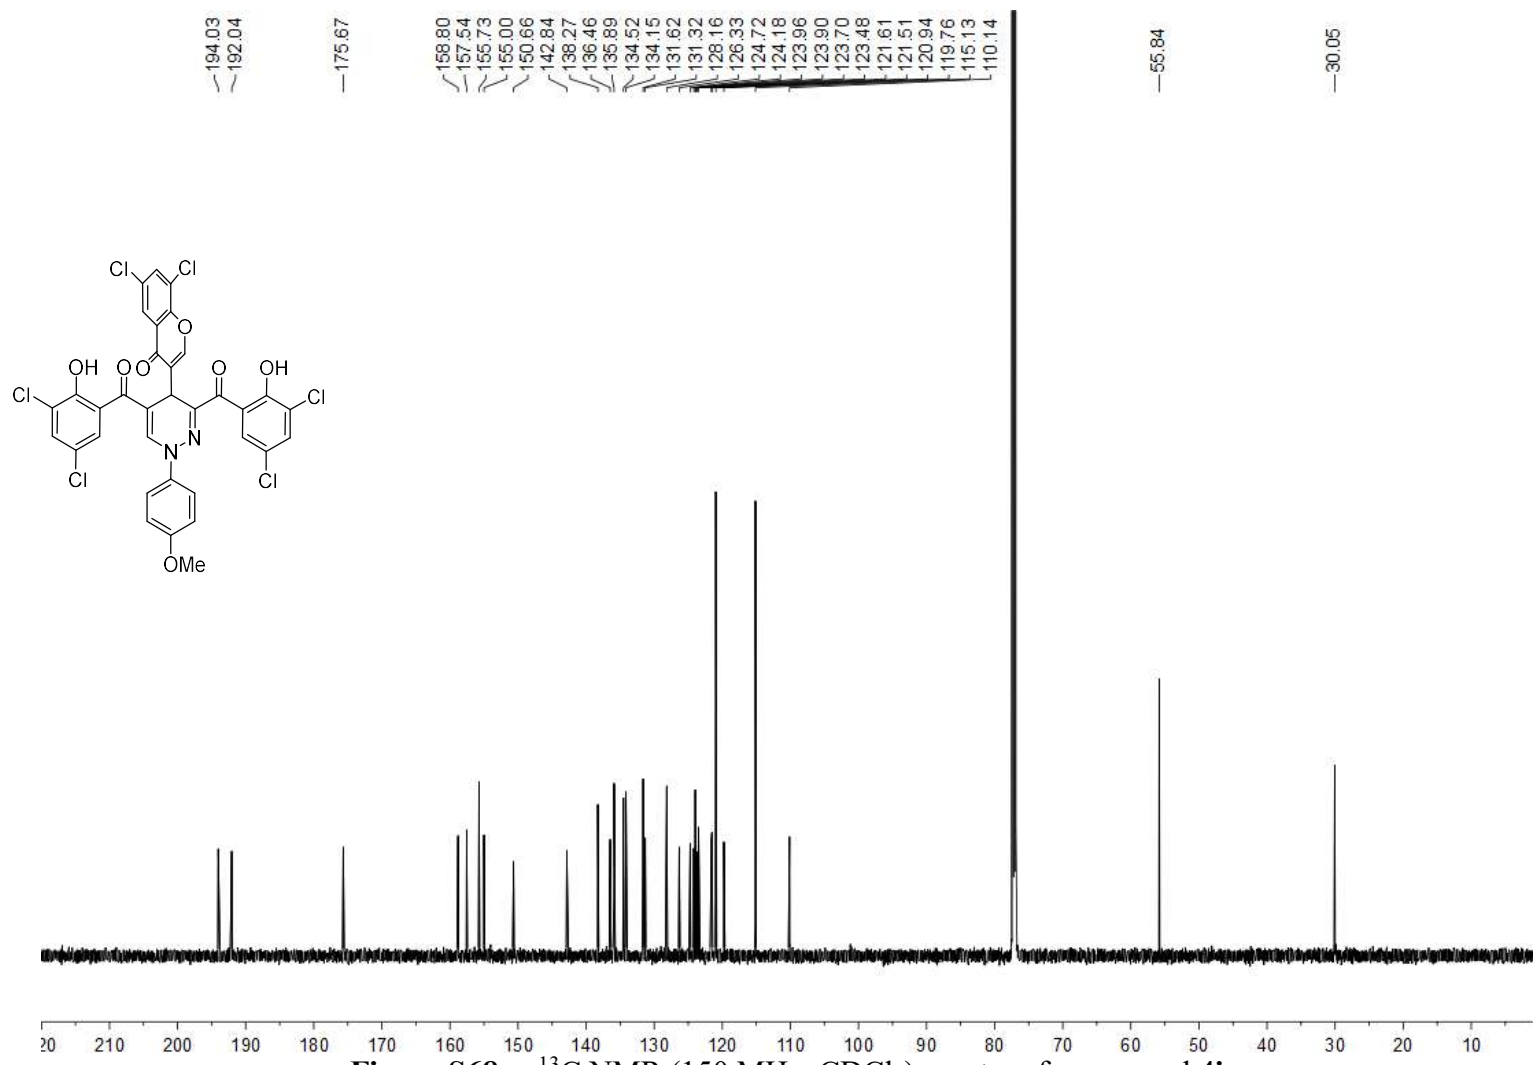

Figure S68. <sup>13</sup>C NMR (150 MHz, CDCl<sub>3</sub>) spectra of compound 4i

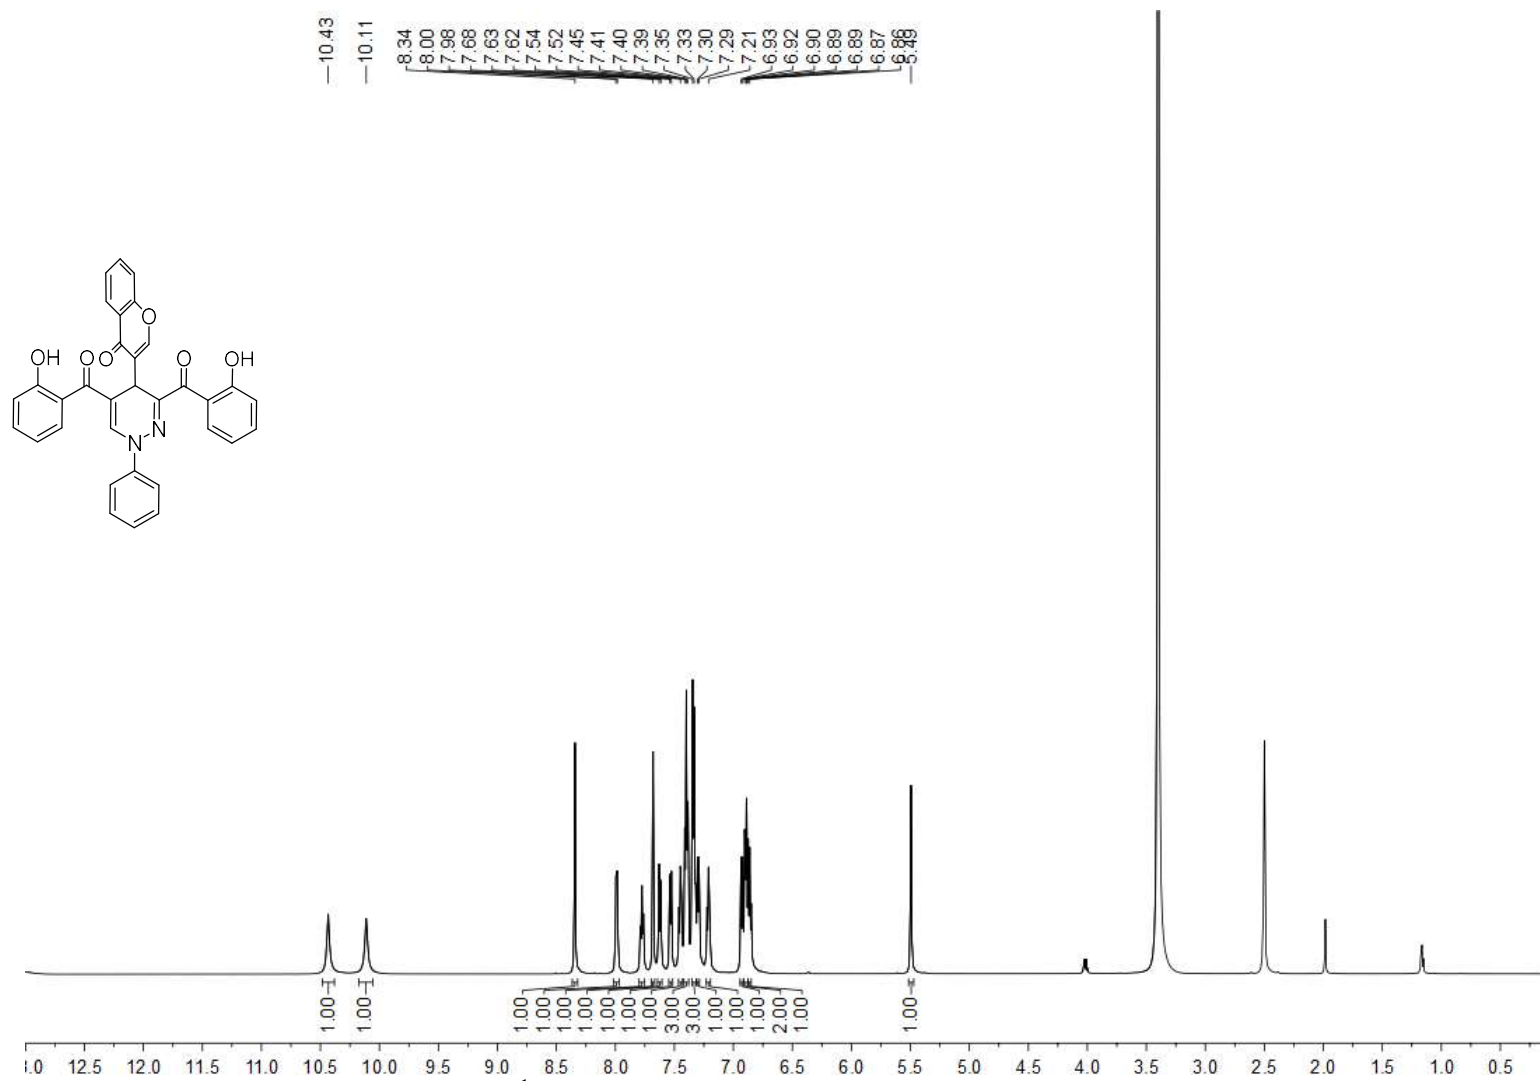

Figure S69. <sup>1</sup>H NMR (600 MHz, DMSO-*d*<sub>6</sub>) spectra of compound 4j

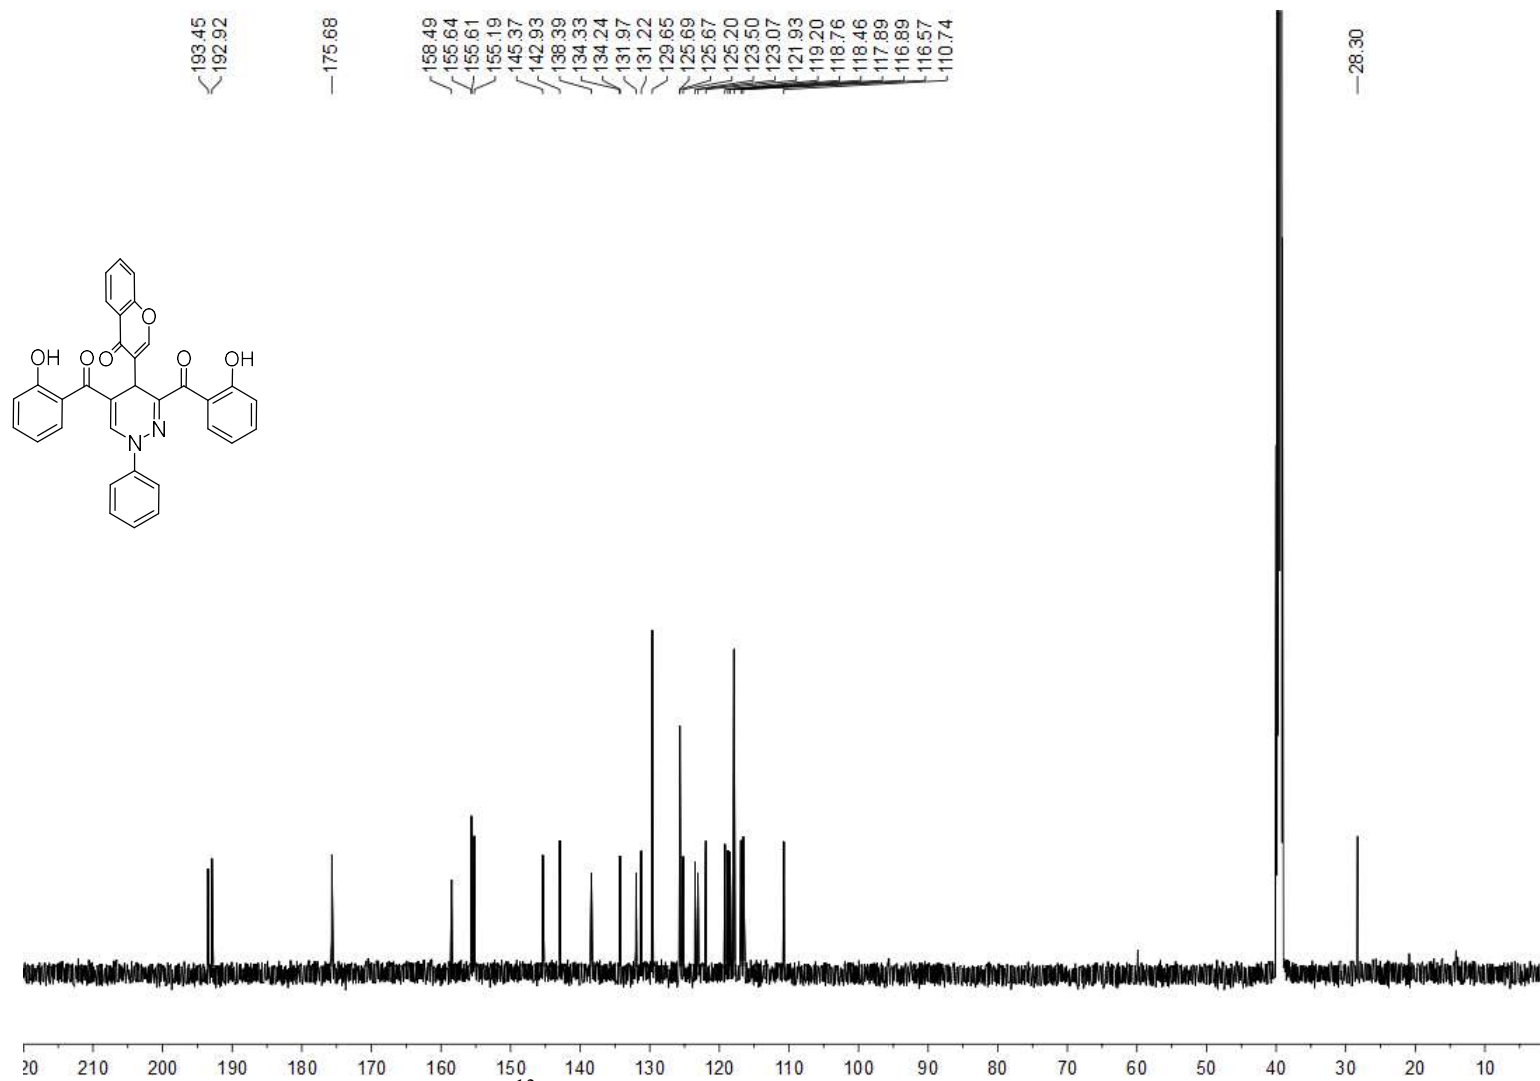

Figure S70. <sup>13</sup>C NMR (150 MHz, DMSO-*d*<sub>6</sub>) spectra of compound 4j

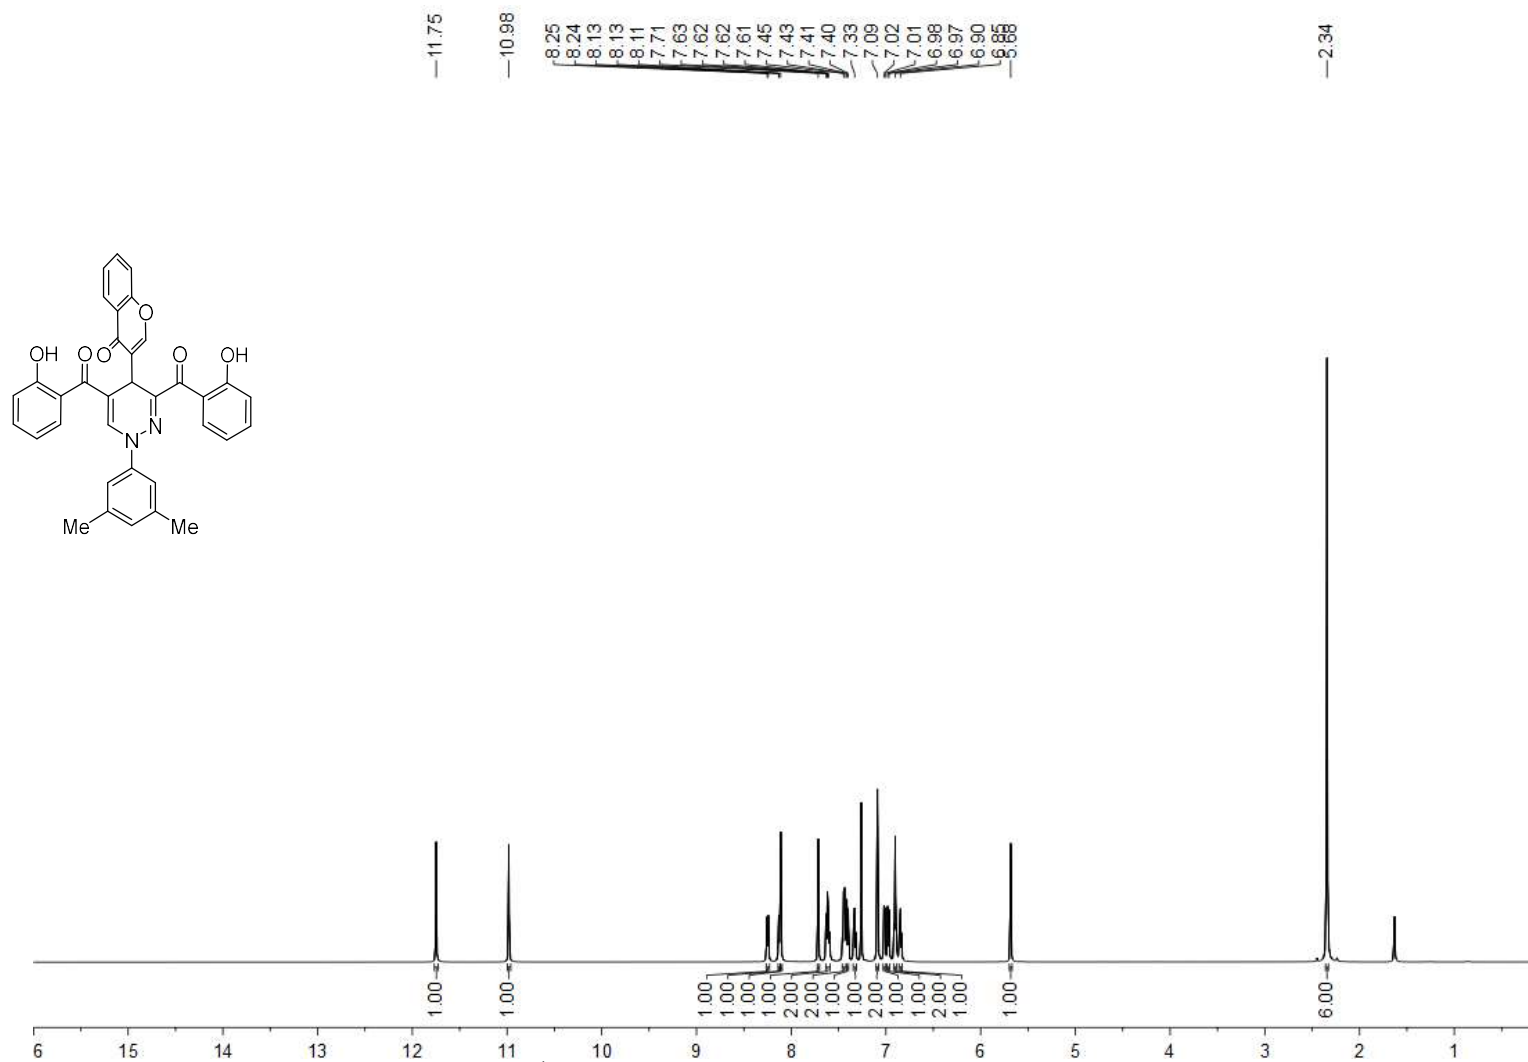

**Figure S71.** <sup>1</sup>H NMR (600 MHz, CDCl<sub>3</sub>) spectra of compound **4k**

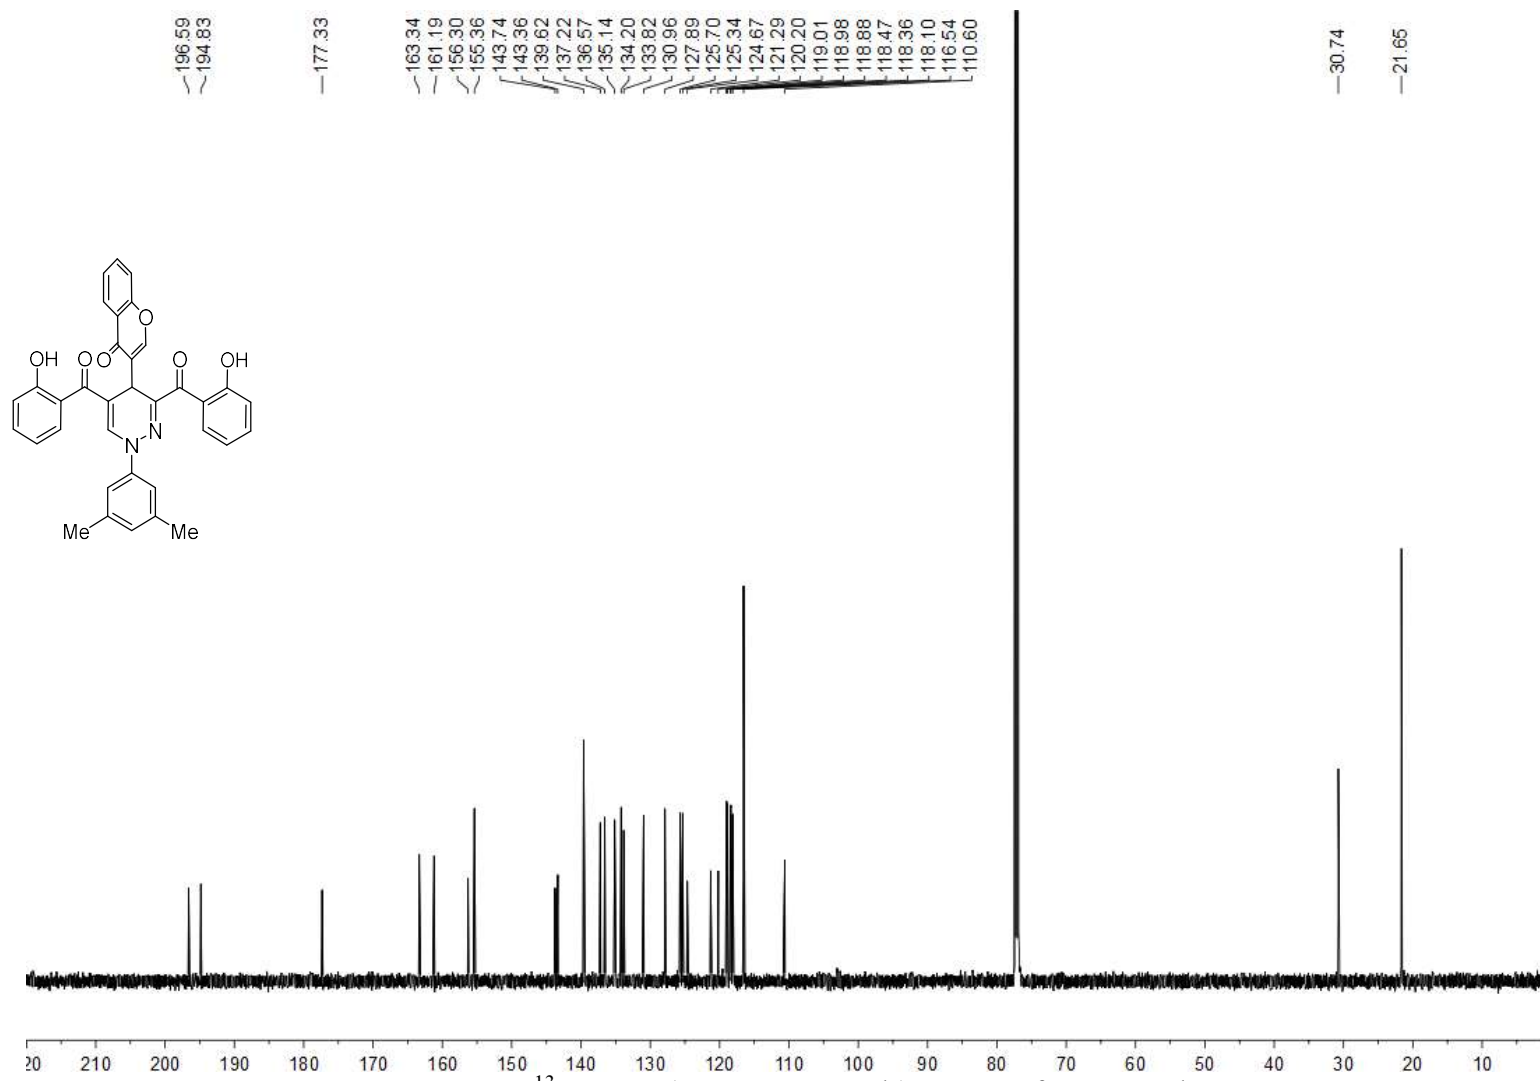

Figure S72. <sup>13</sup>C NMR (150 MHz, CDCl<sub>3</sub>) spectra of compound 4k



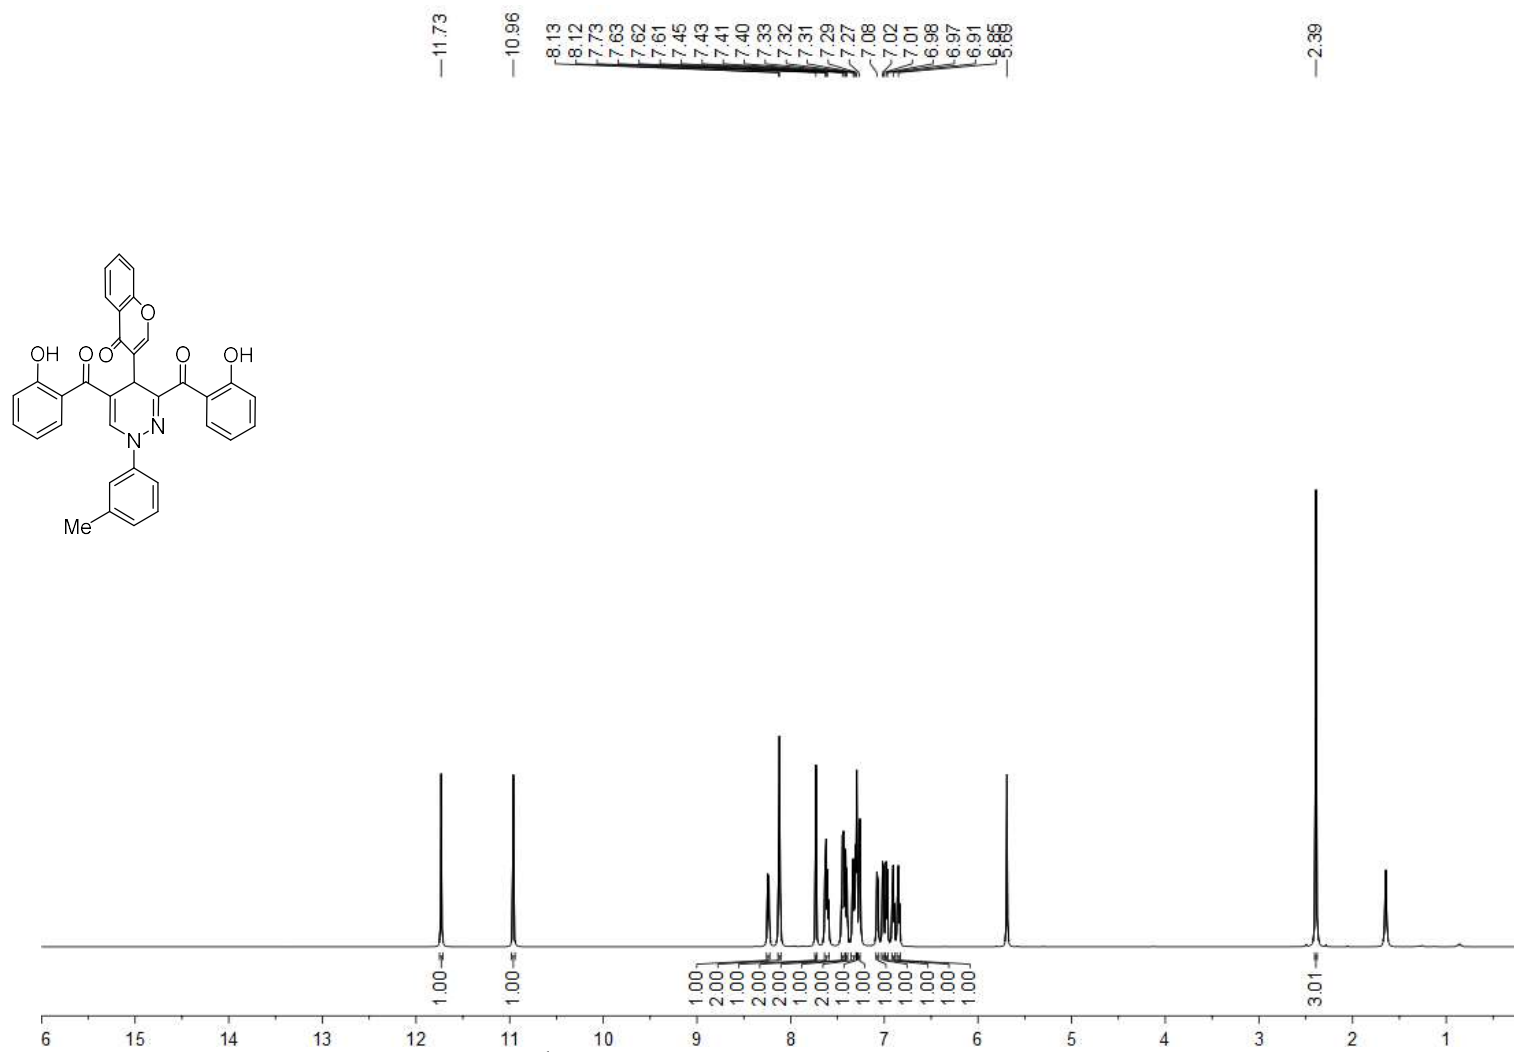

**Figure S73.**  $^1\text{H NMR}$  (600 MHz,  $\text{CDCl}_3$ ) spectra of compound **4I**

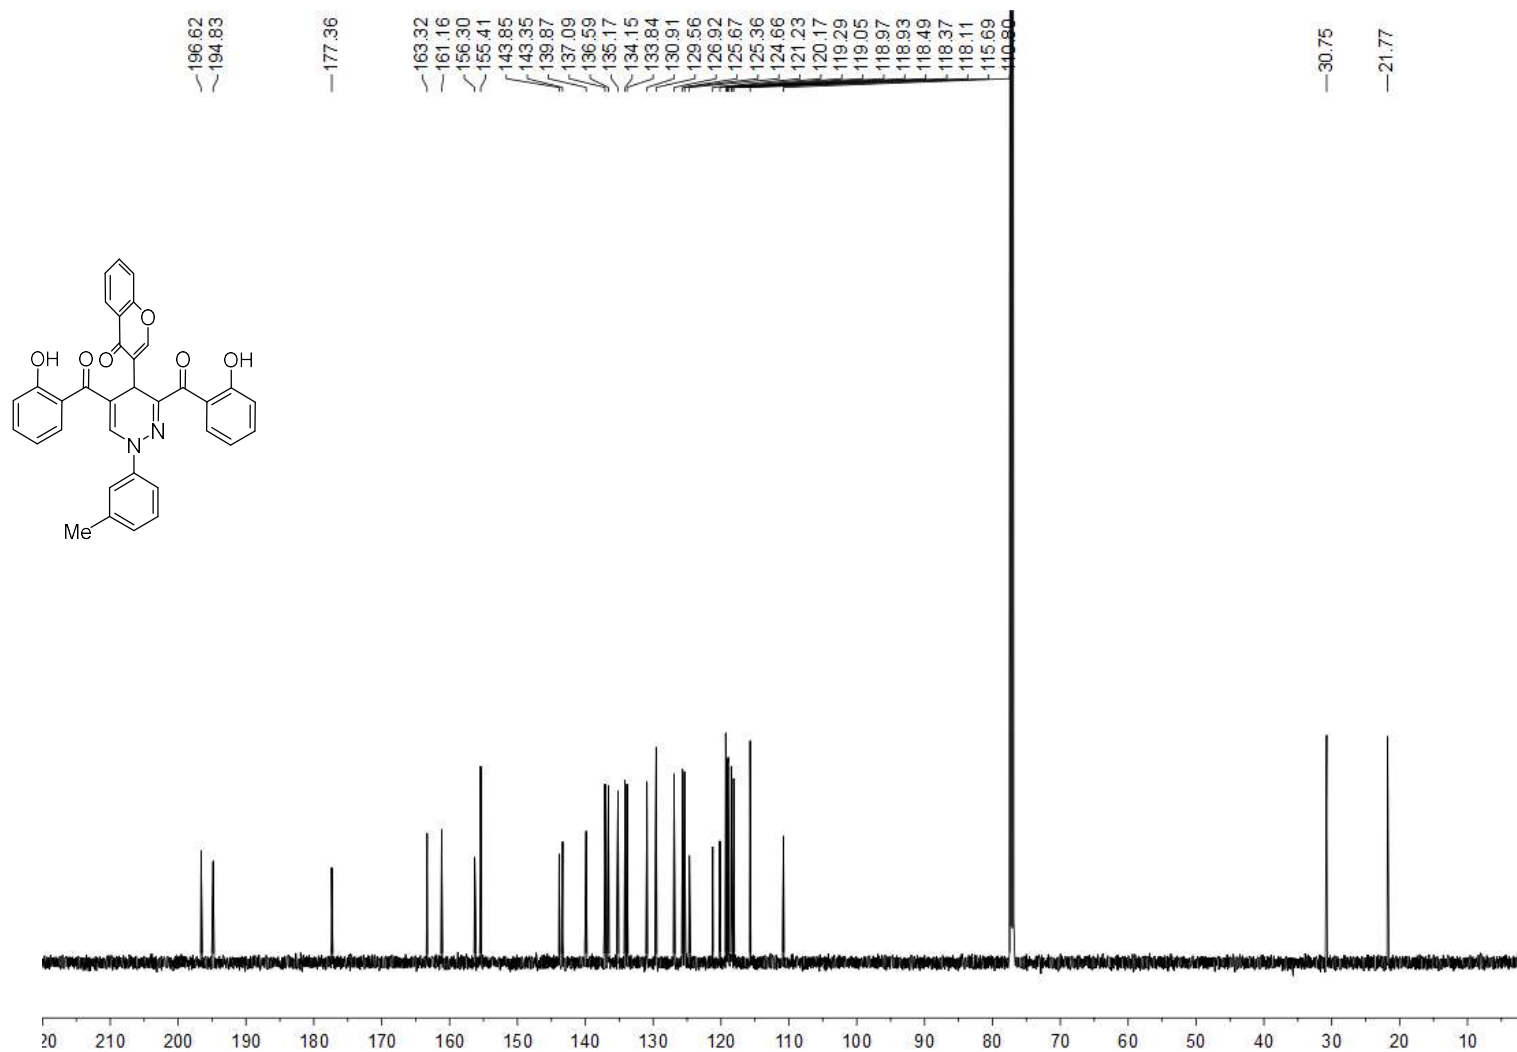

Figure S74. <sup>13</sup>C NMR (150 MHz, CDCl<sub>3</sub>) spectra of compound 4l

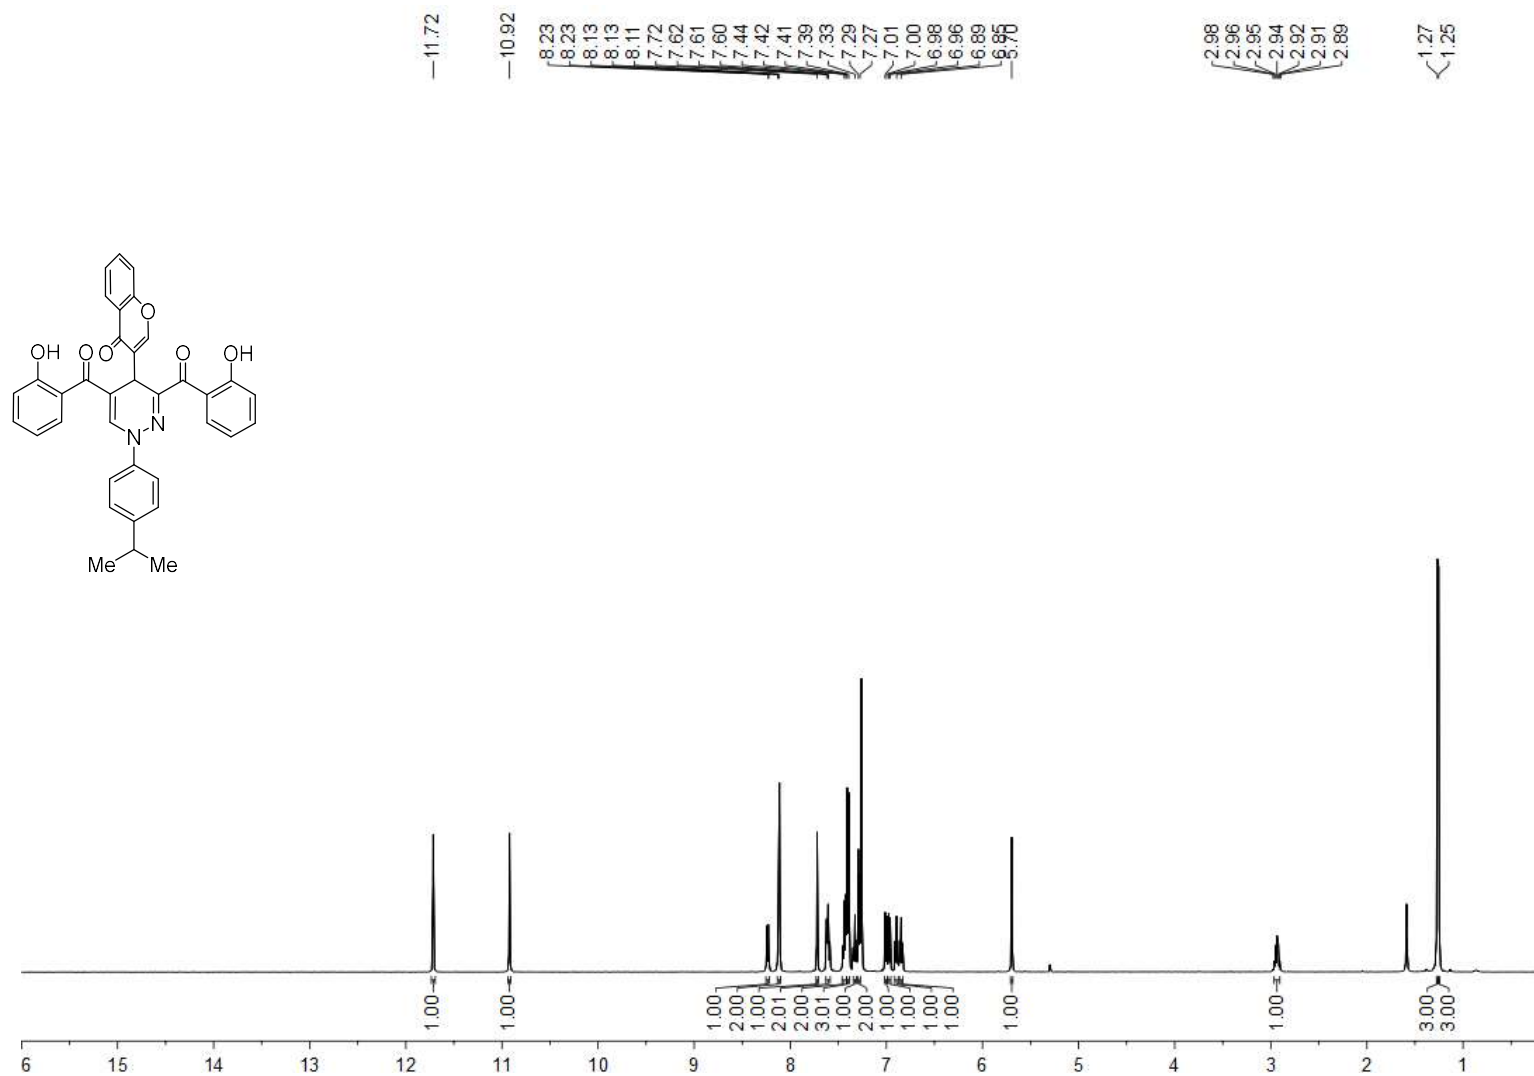

**Figure S75.**  $^1\text{H NMR}$  (500MHz,  $\text{CDCl}_3$ ) spectra of compound **4m**

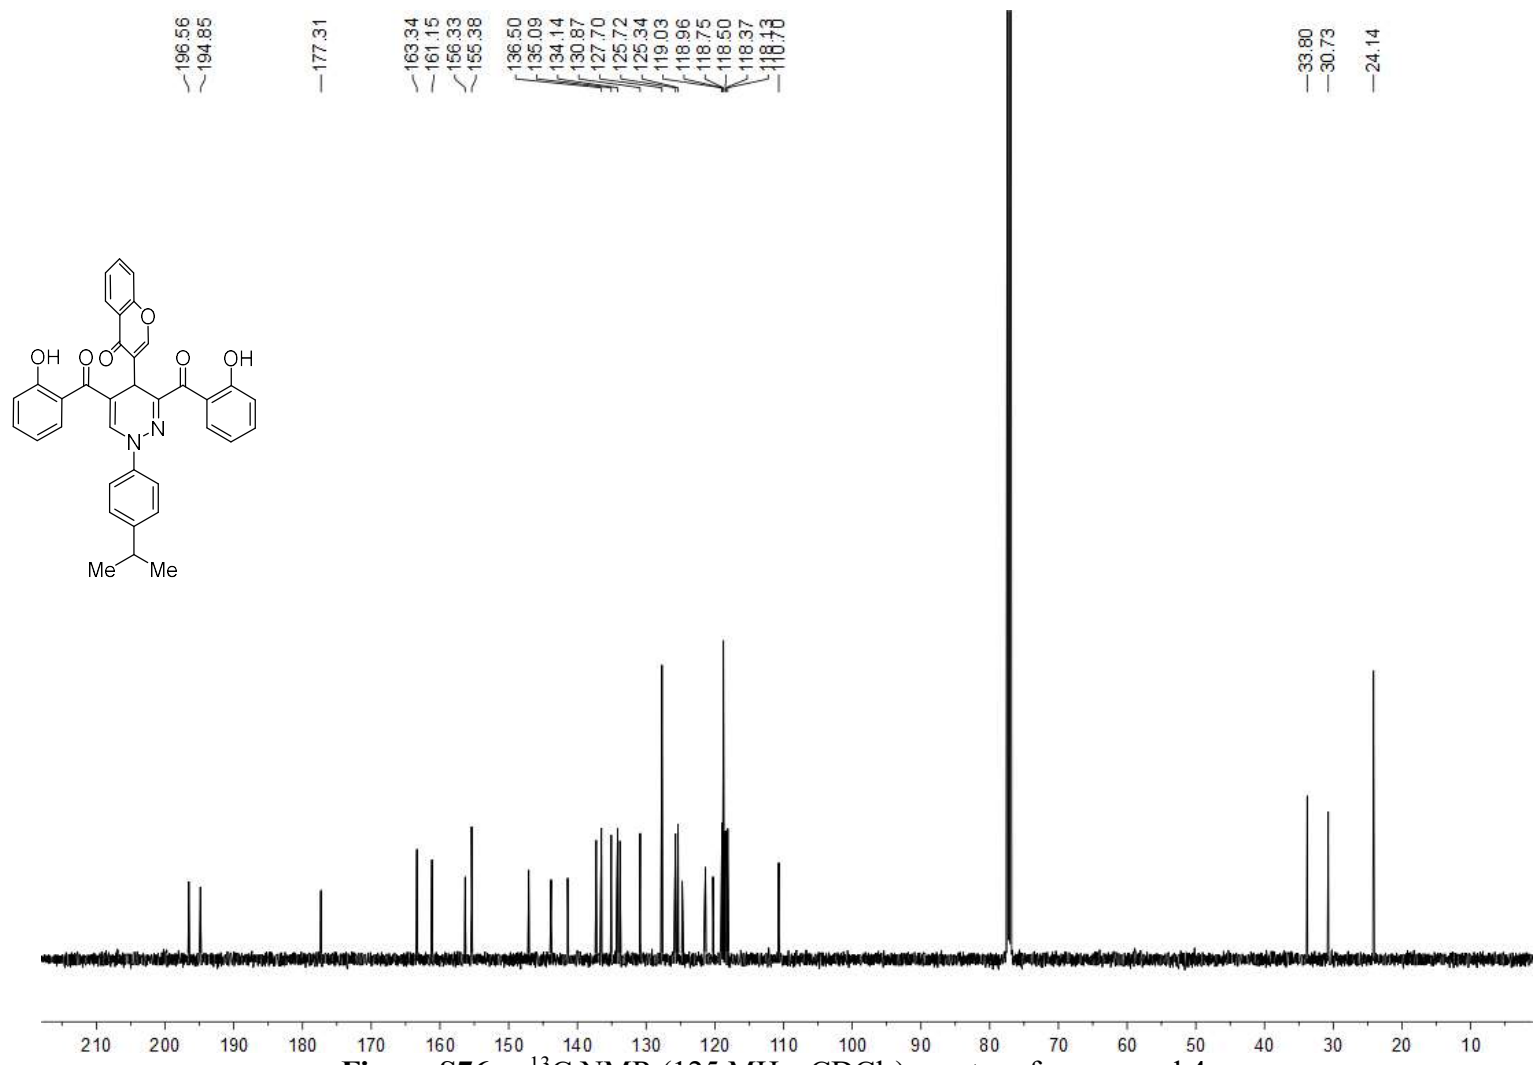

Figure S76. <sup>13</sup>C NMR (125 MHz, CDCl<sub>3</sub>) spectra of compound 4m

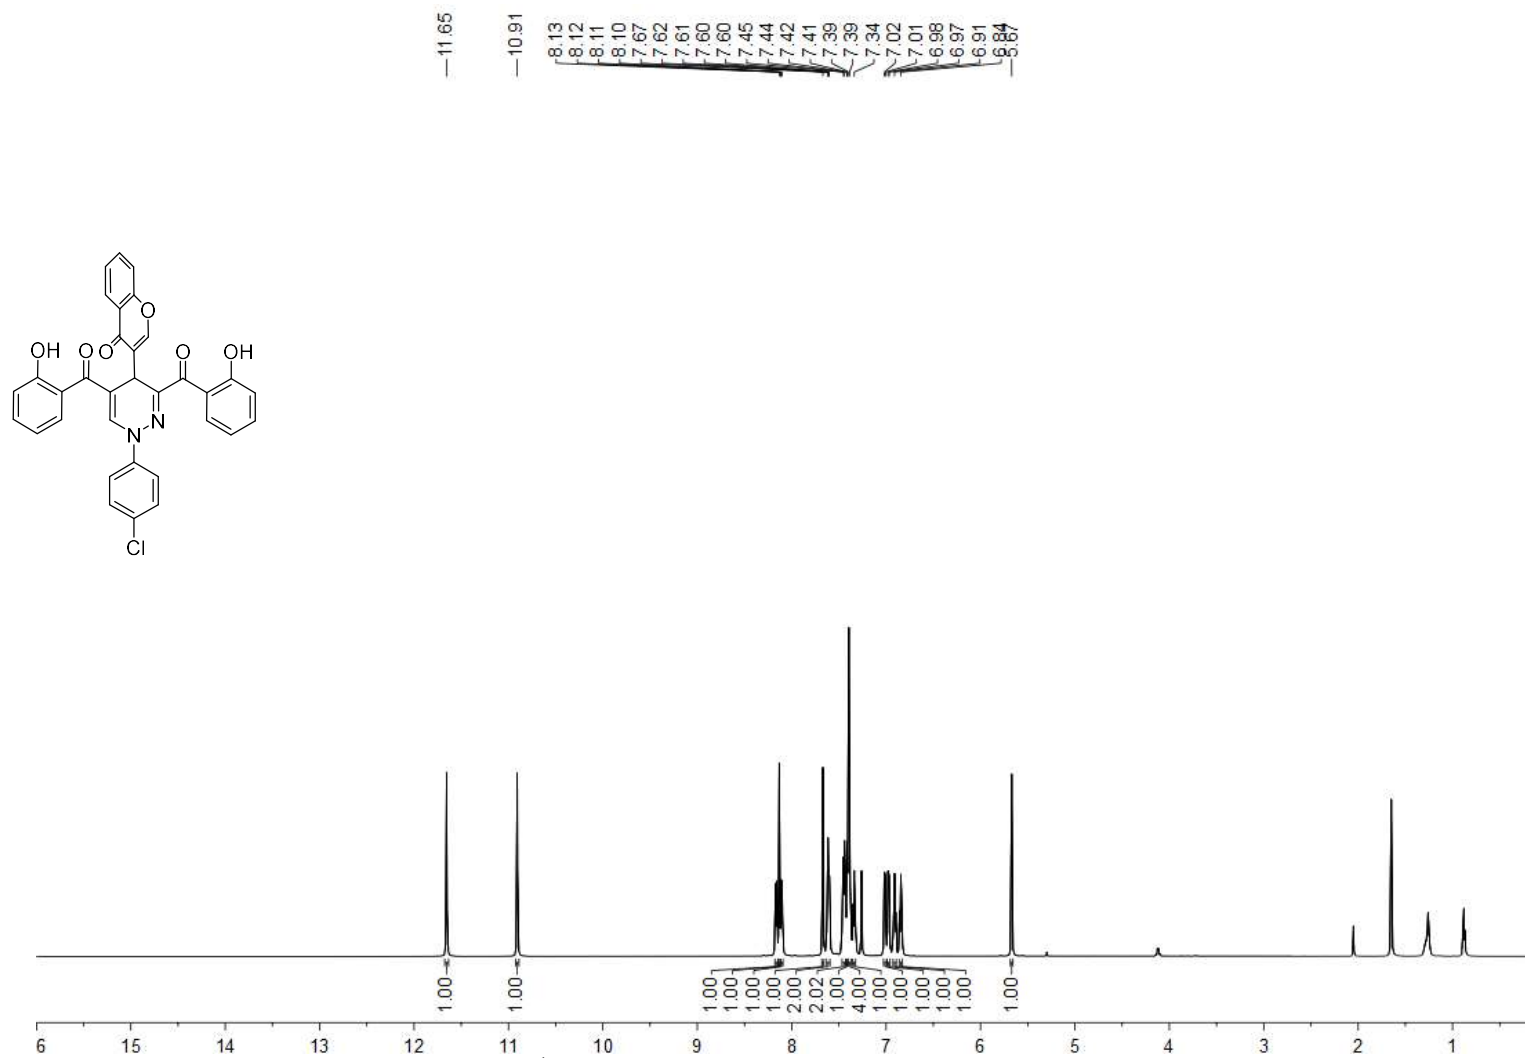

**Figure S77.**  $^1\text{H NMR}$  (600 MHz,  $\text{CDCl}_3$ ) spectra of compound **4n**

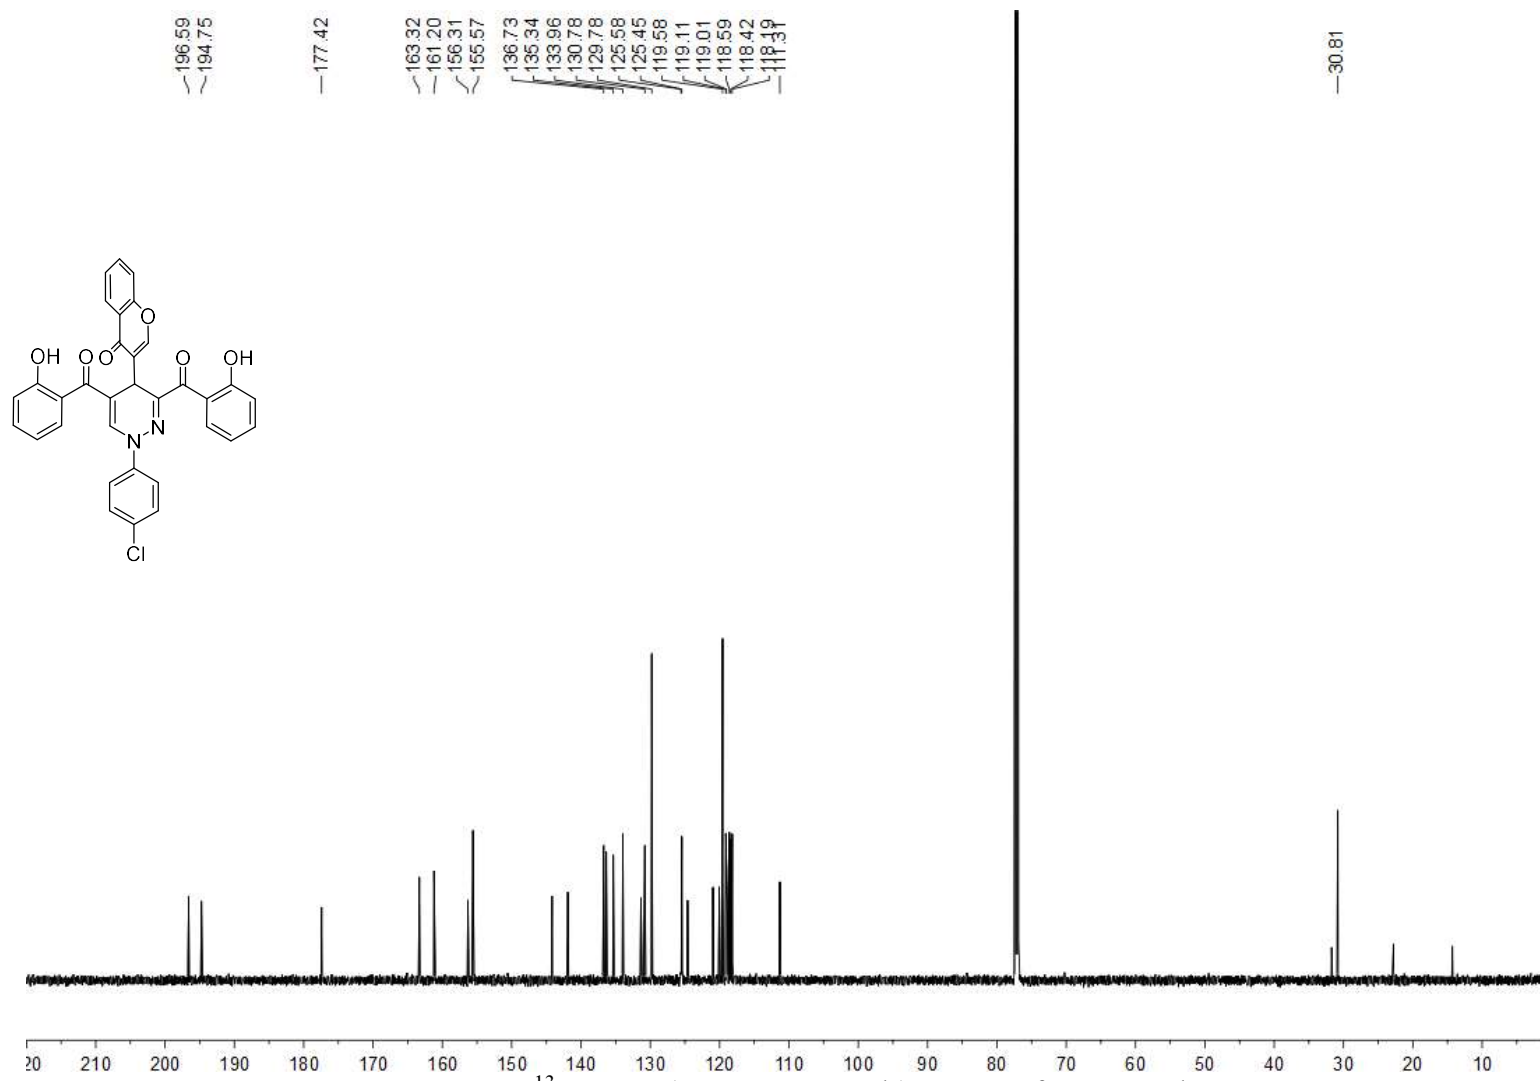

Figure S78. <sup>13</sup>C NMR (150 MHz, CDCl<sub>3</sub>) spectra of compound 4n

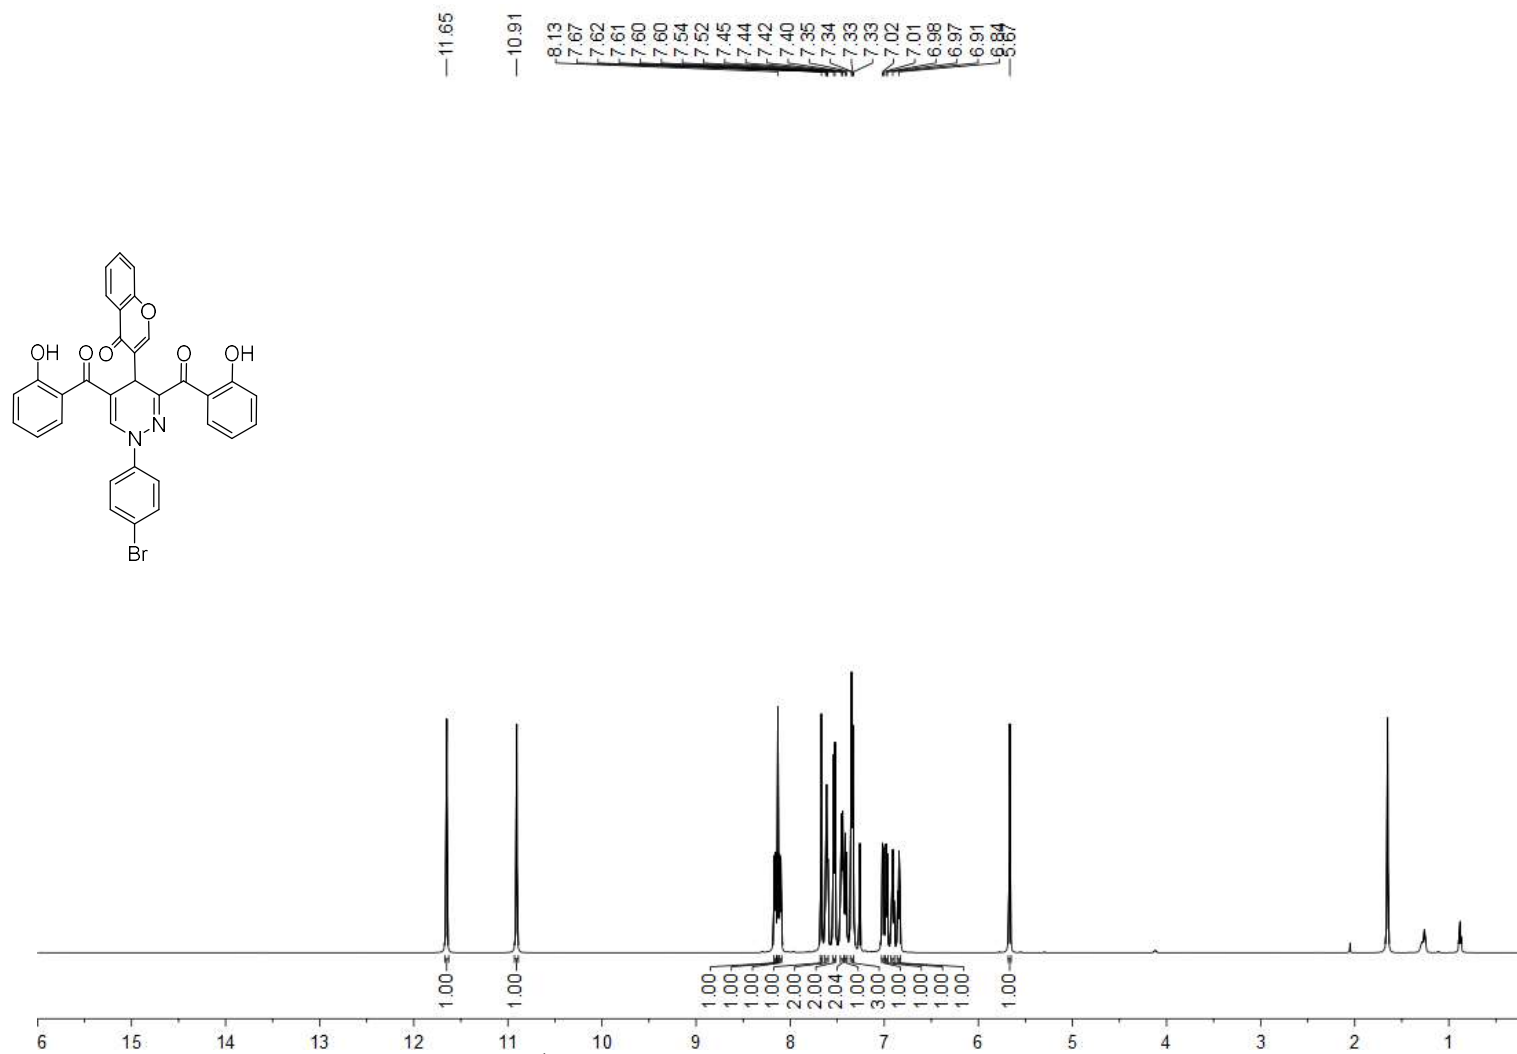

**Figure S79.**  $^1\text{H NMR}$  (600 MHz,  $\text{CDCl}_3$ ) spectra of compound **4o**

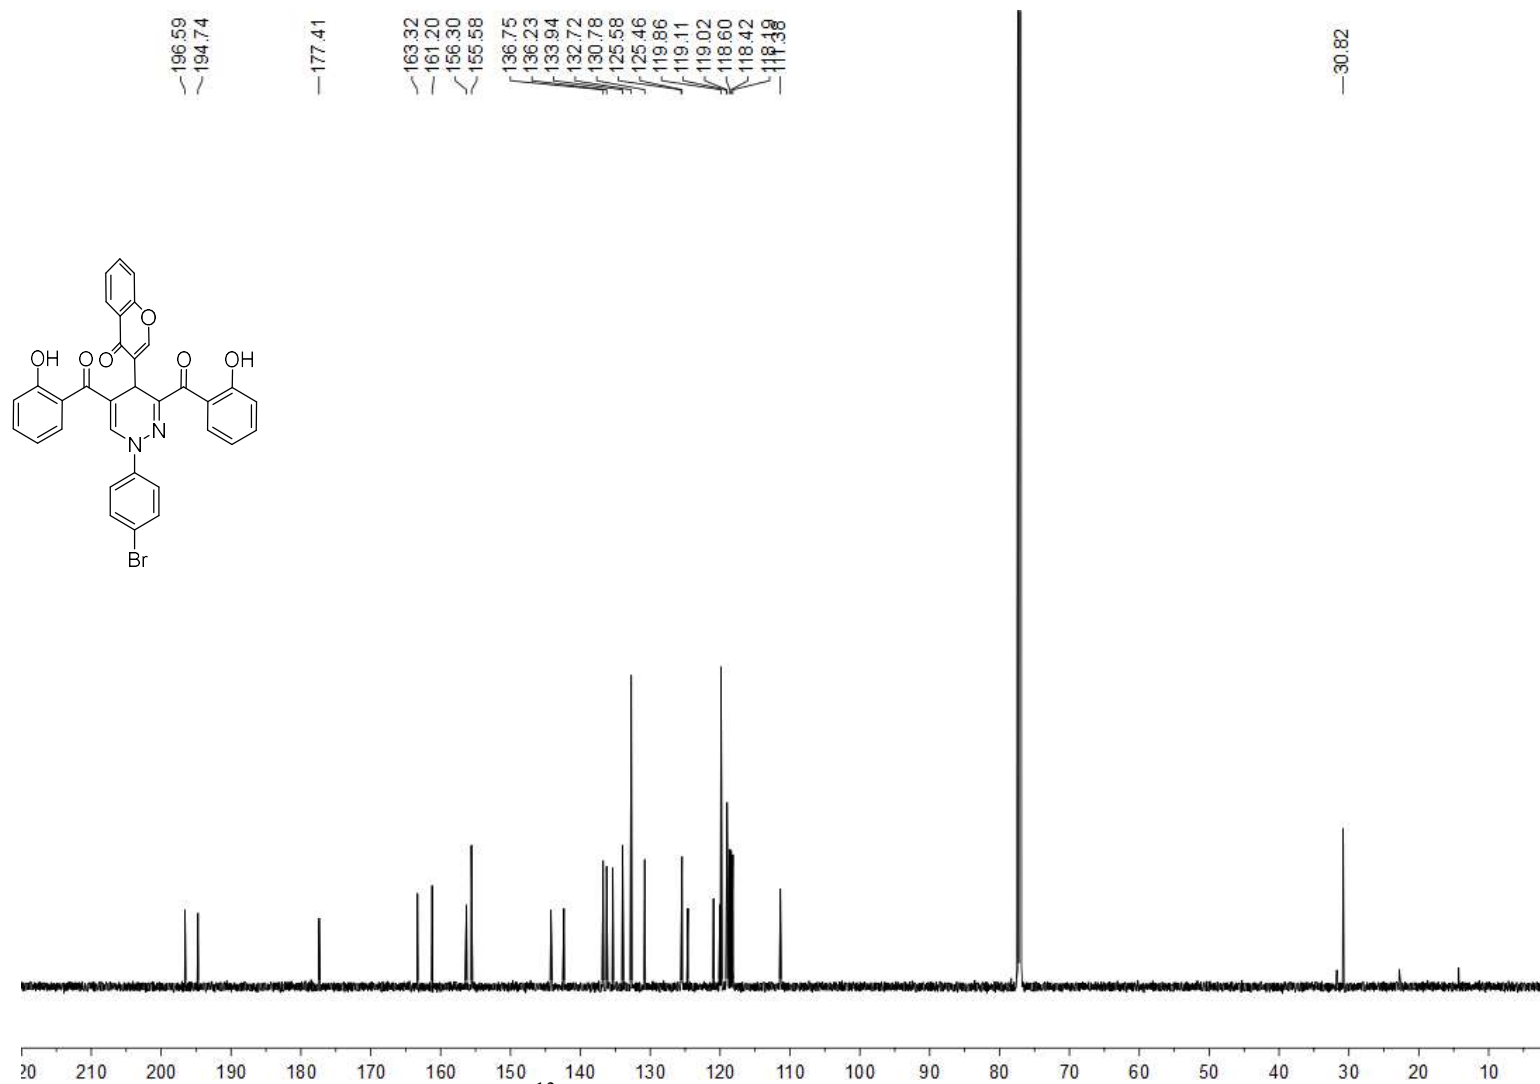

Figure S80. <sup>13</sup>C NMR (150 MHz, CDCl<sub>3</sub>) spectra of compound 40



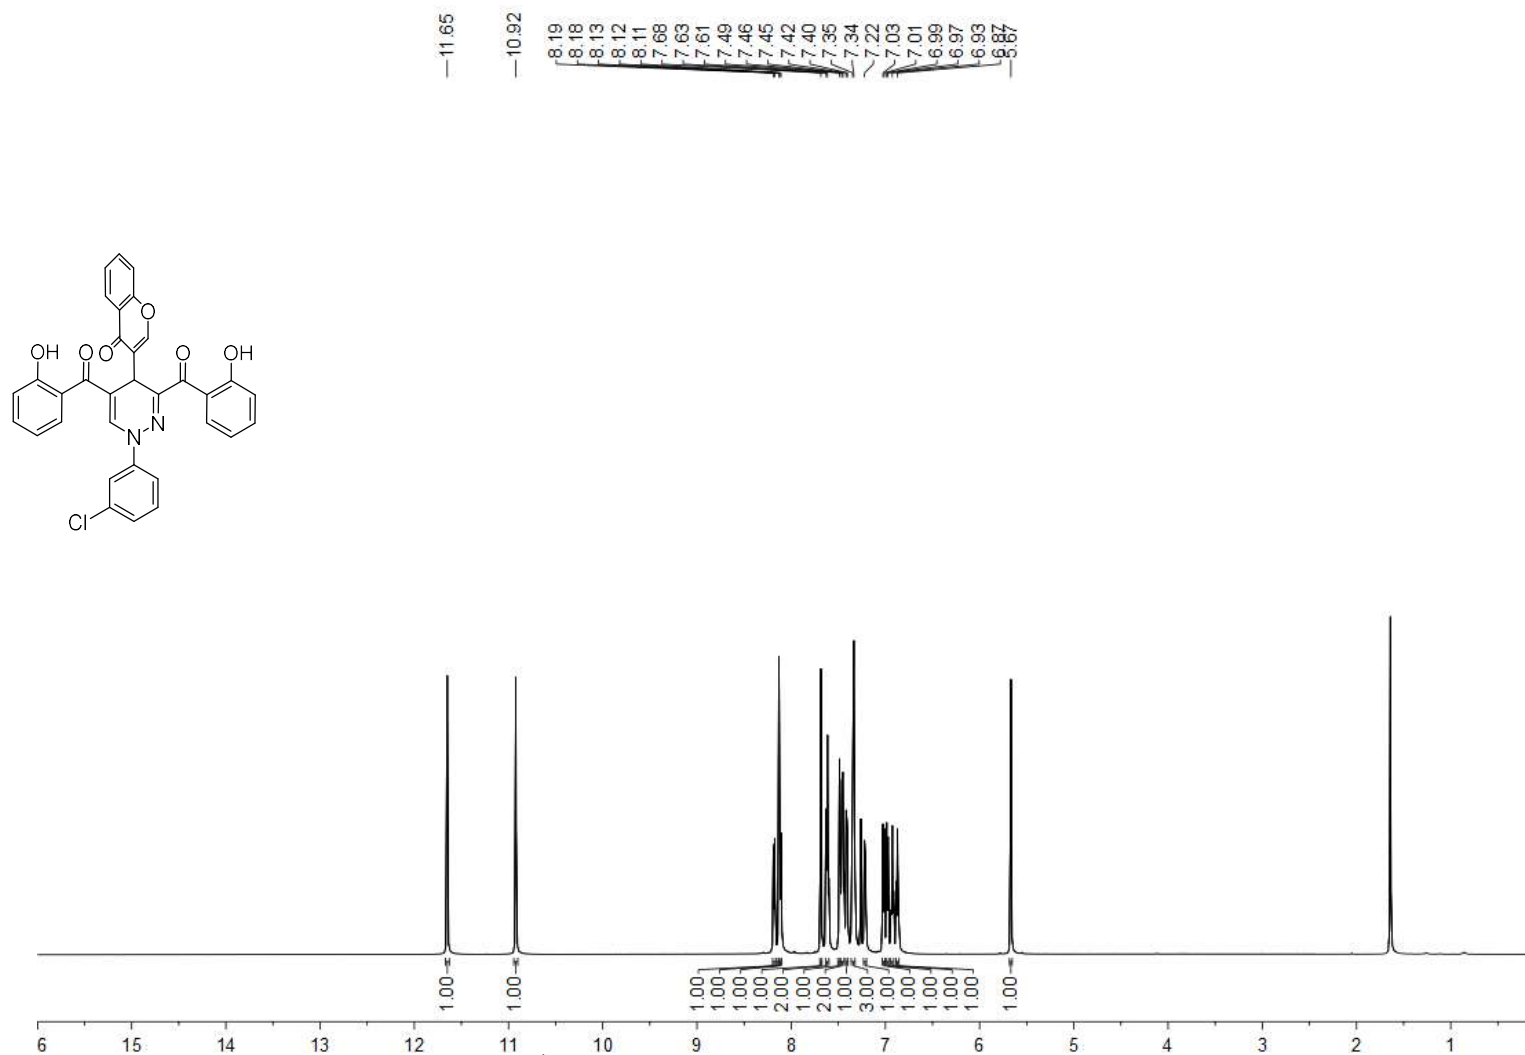

Figure S81. <sup>1</sup>H NMR (600 MHz, CDCl<sub>3</sub>) spectra of compound 4p

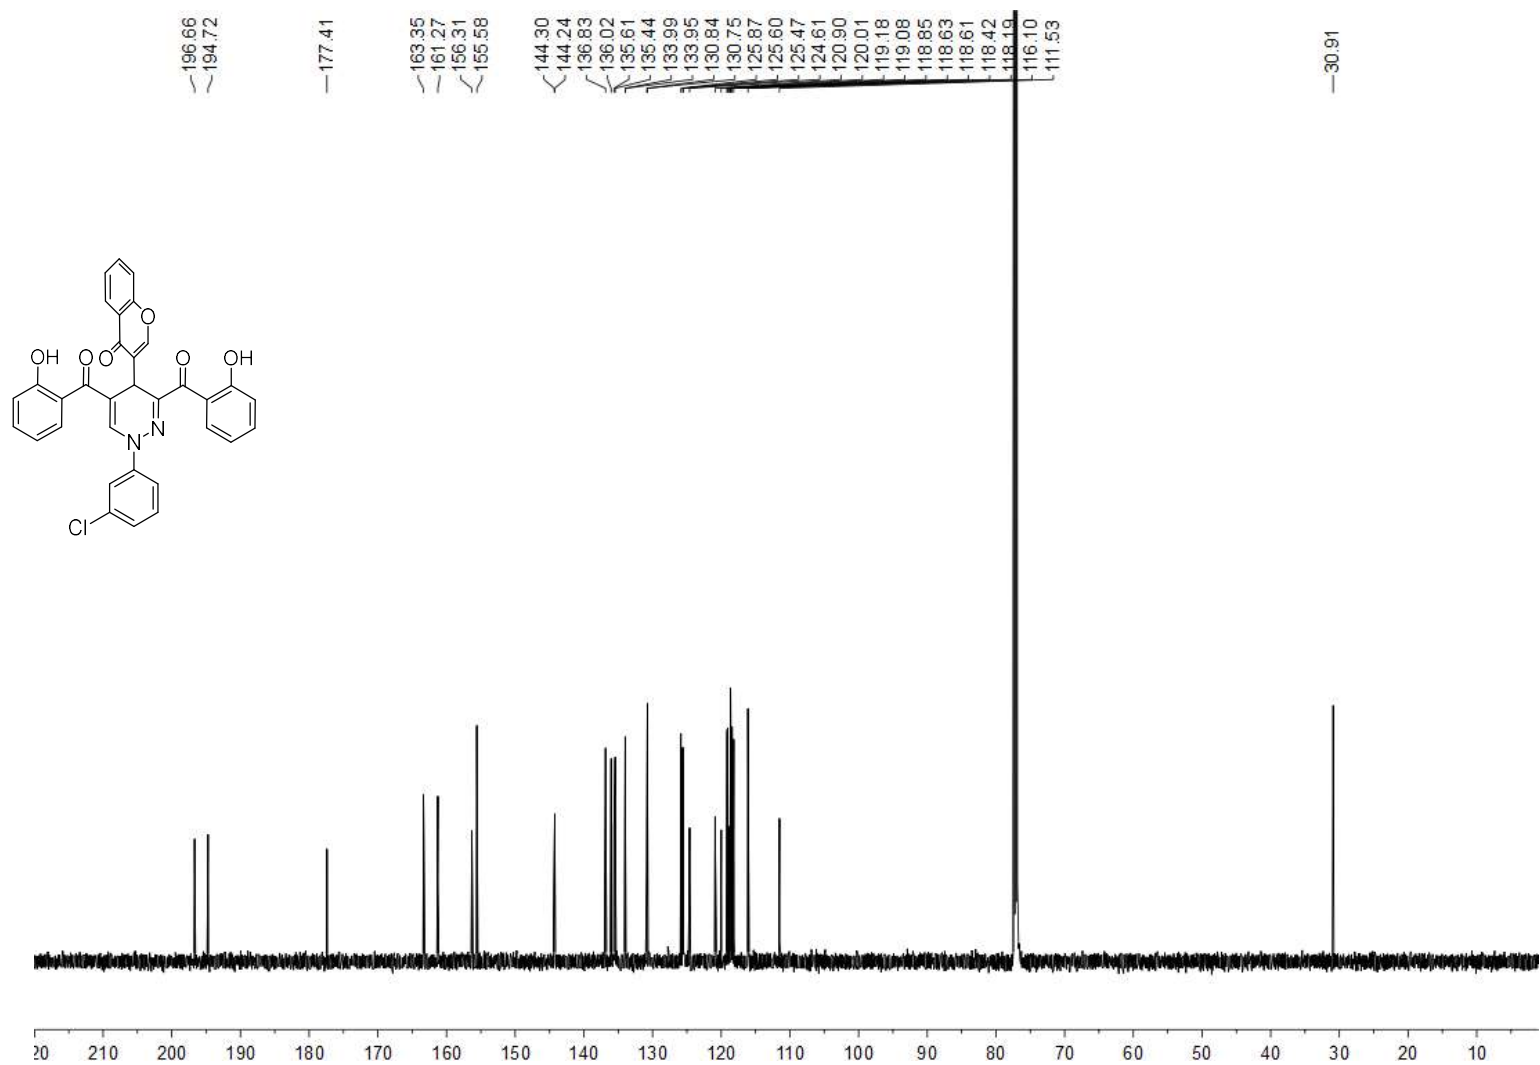

Figure S82. <sup>13</sup>C NMR (150 MHz, CDCl<sub>3</sub>) spectra of compound 4p

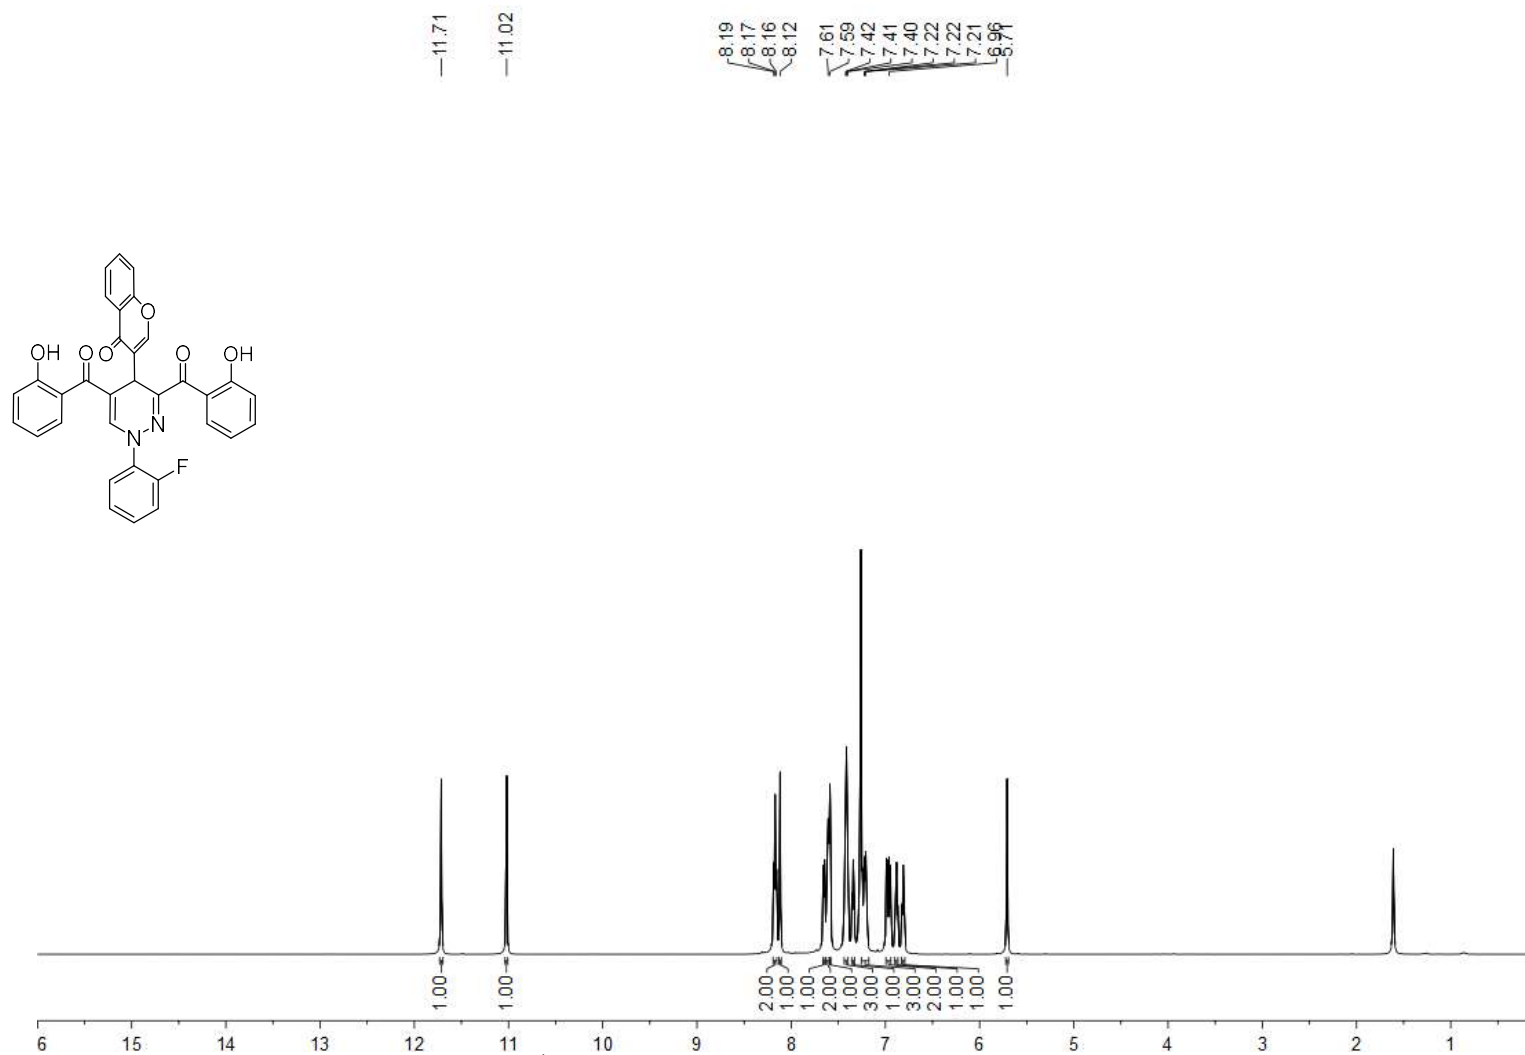

**Figure S83.** <sup>1</sup>H NMR (600 MHz, CDCl<sub>3</sub>) spectra of compound **4q**

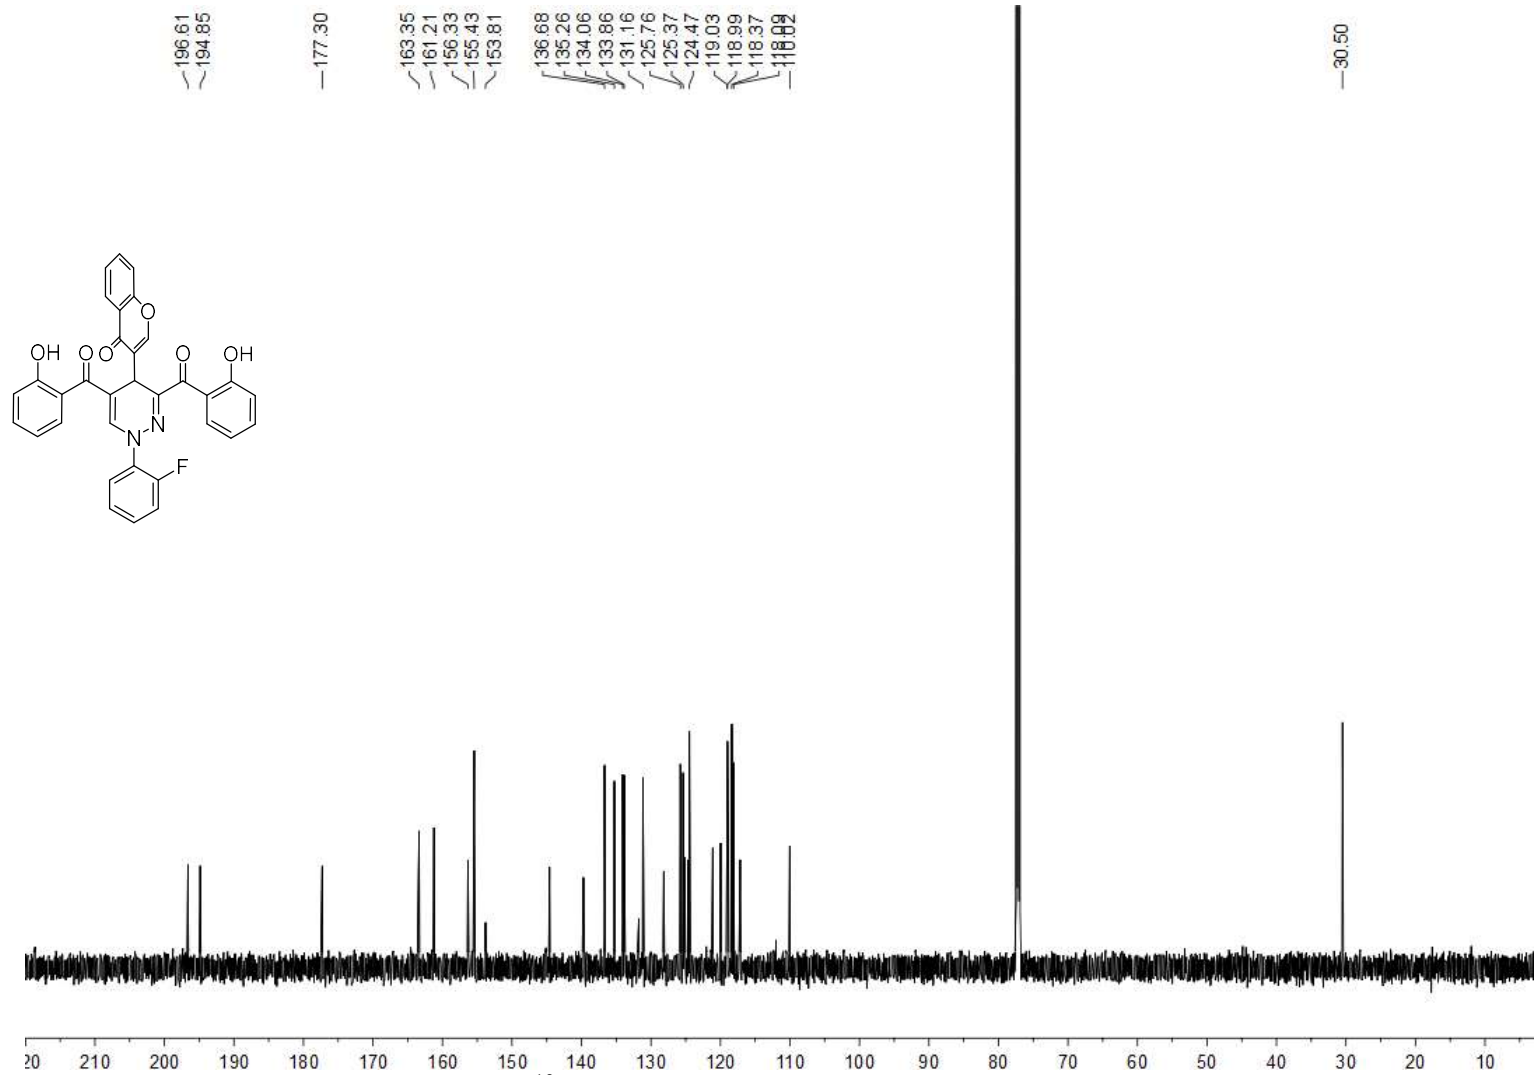

Figure S84. <sup>13</sup>C NMR (150 MHz, CDCl<sub>3</sub>) spectra of compound 4q

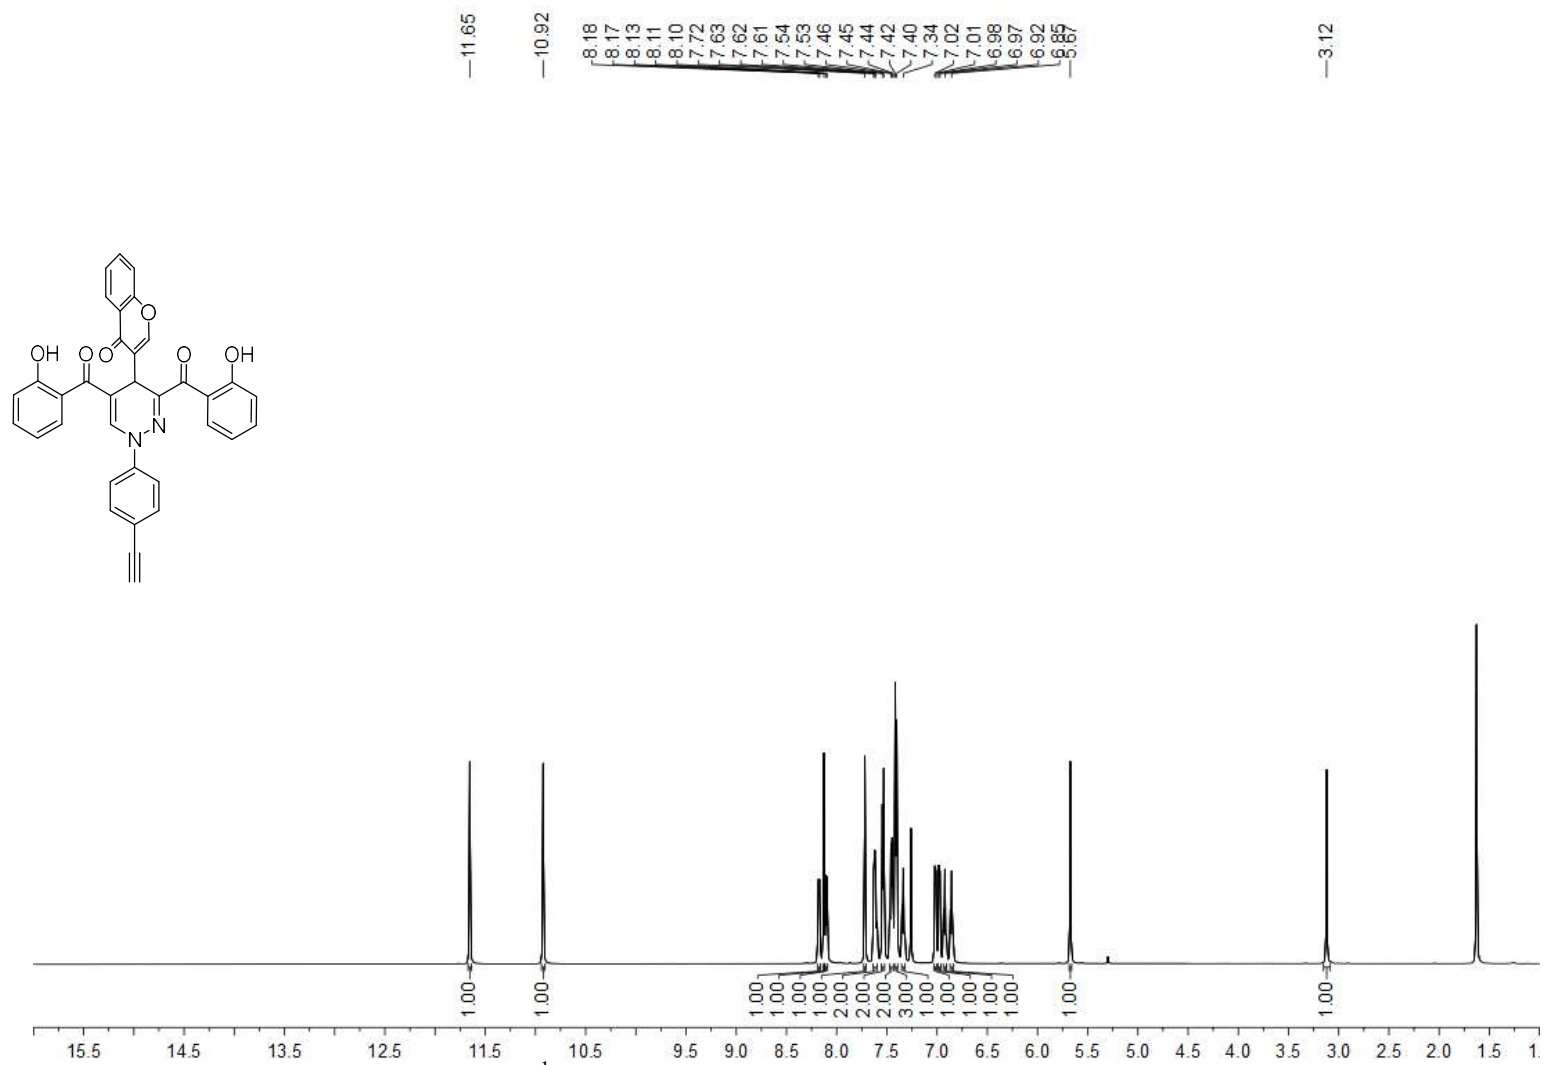

**Figure S85.**  $^1\text{H NMR}$  (600 MHz,  $\text{CDCl}_3$ ) spectra of compound **4r**

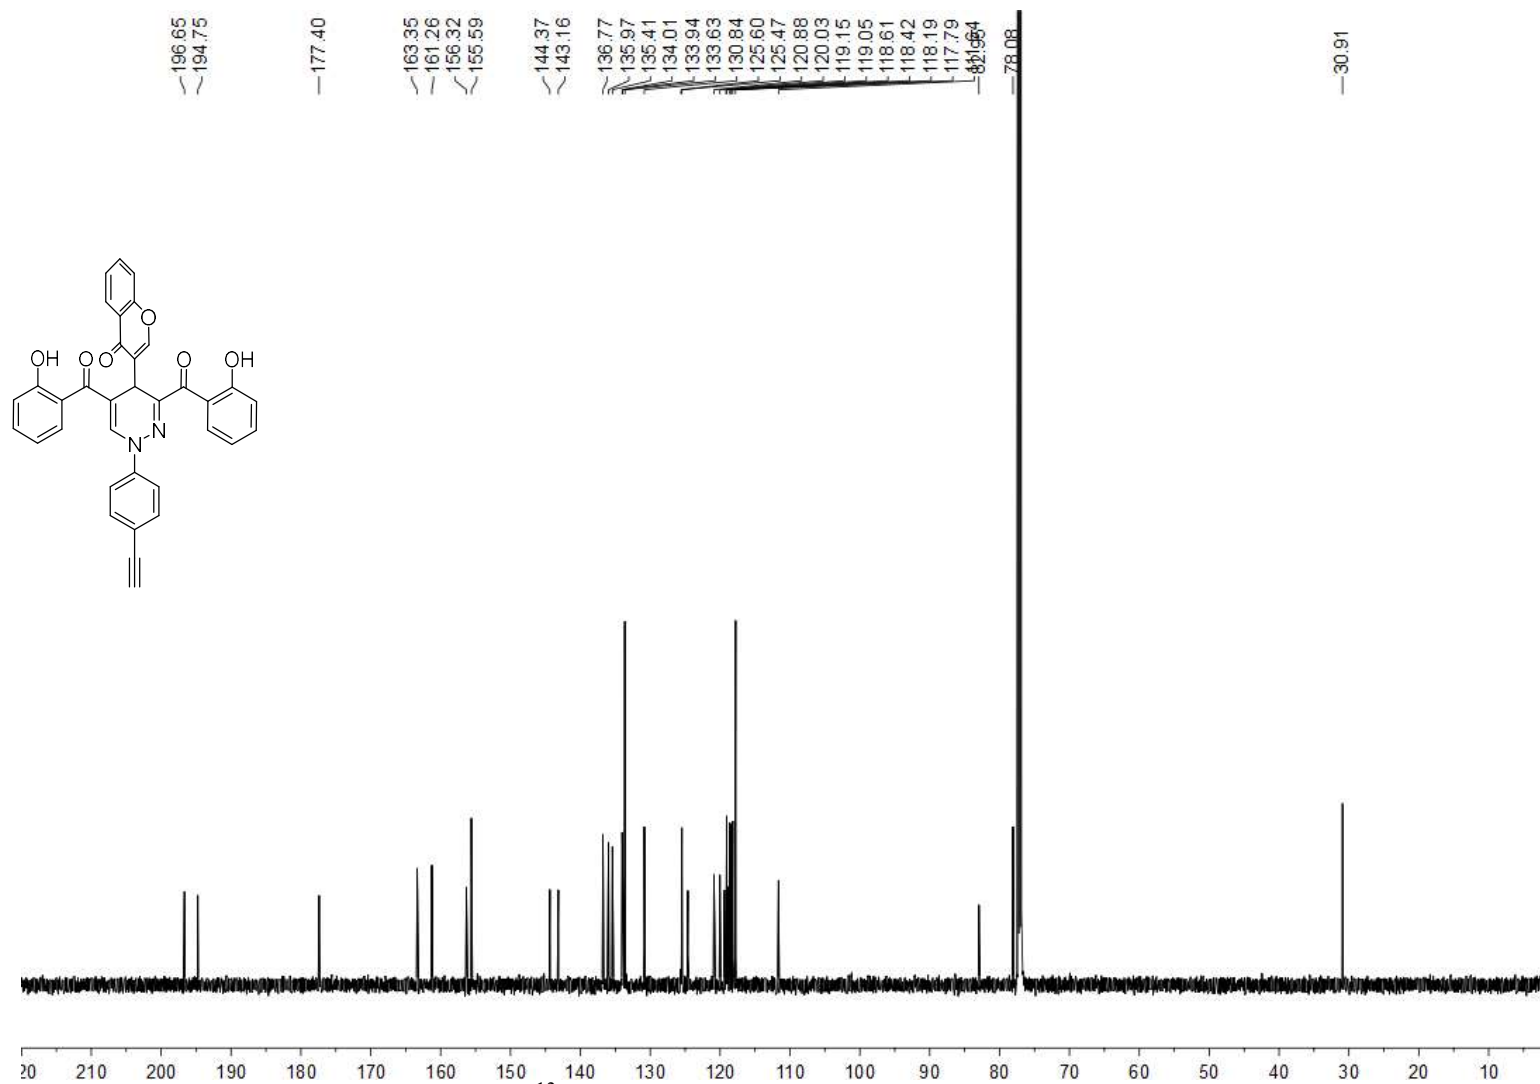

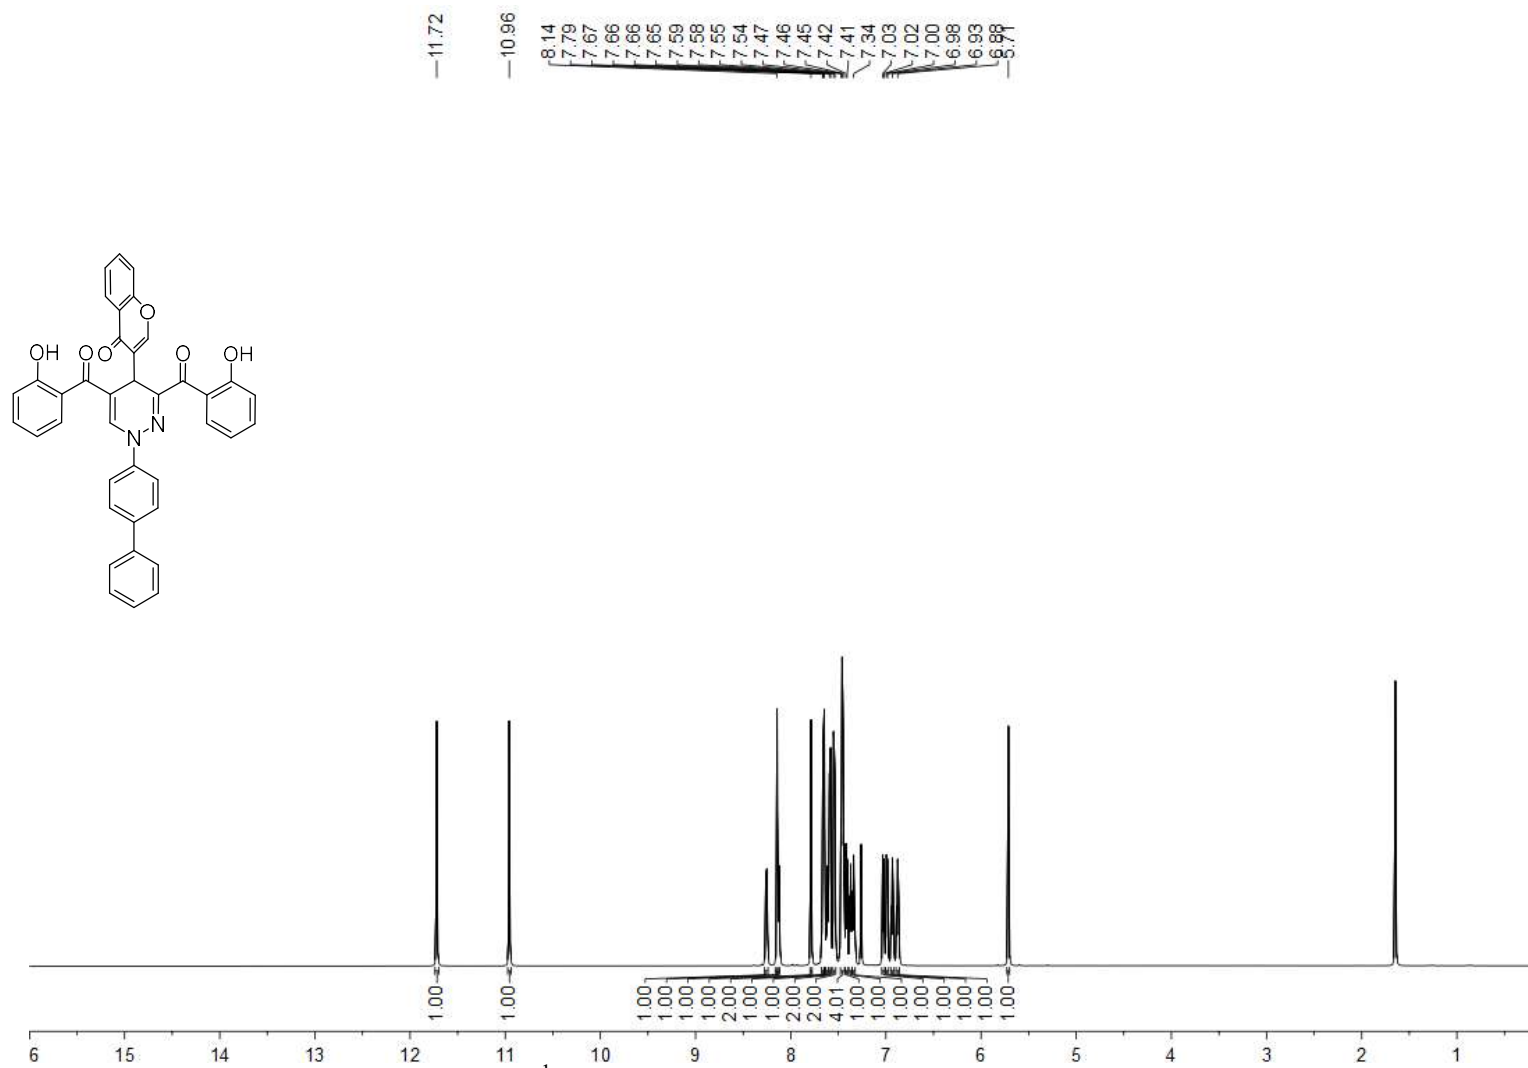

**Figure S87.**  $^1\text{H NMR}$  (600 MHz,  $\text{CDCl}_3$ ) spectra of compound **4s**

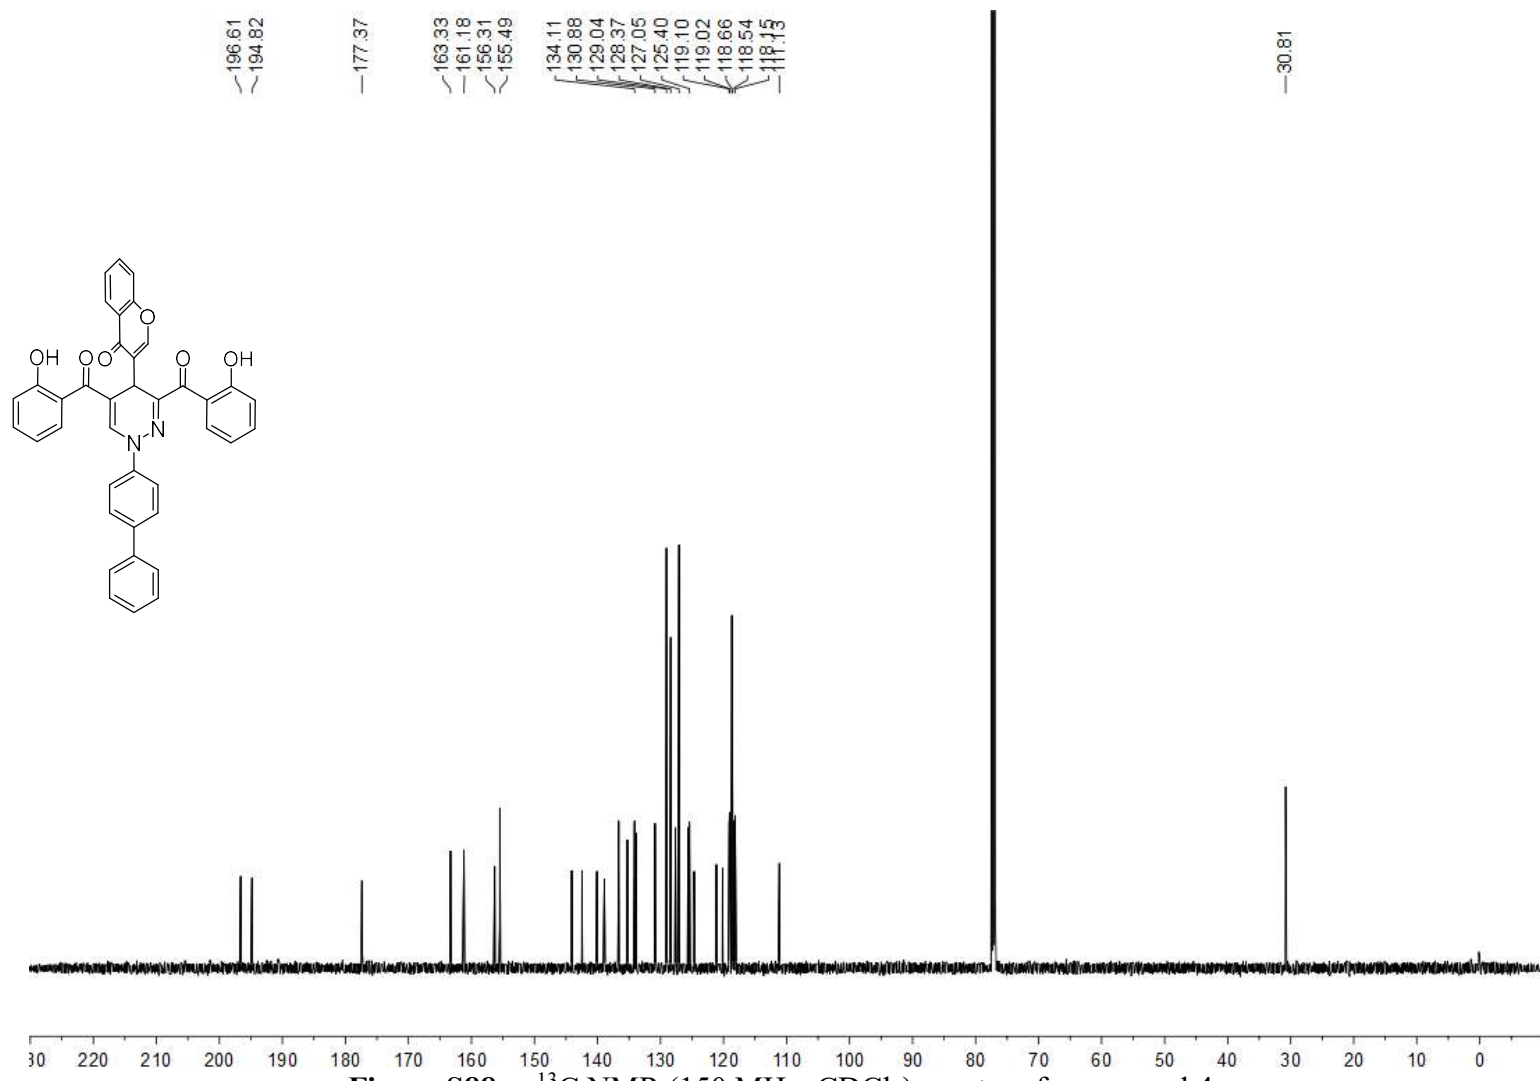

Figure S88. <sup>13</sup>C NMR (150 MHz, CDCl<sub>3</sub>) spectra of compound 4s



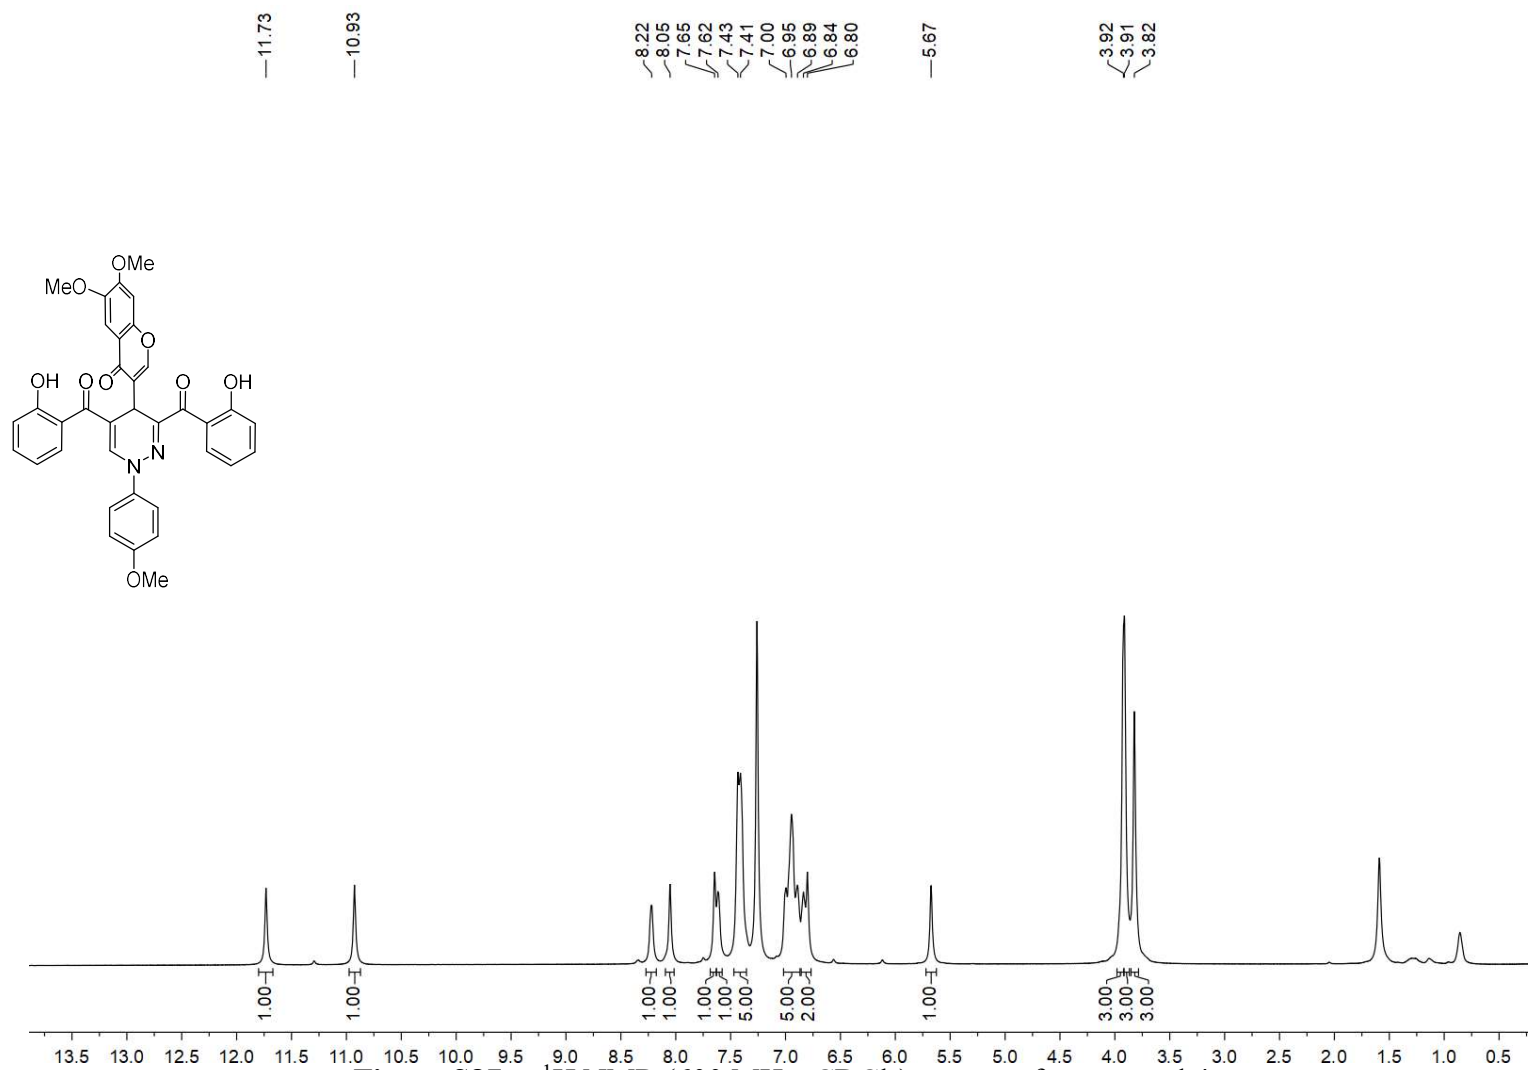

**Figure S87.** <sup>1</sup>H NMR (600 MHz, CDCl<sub>3</sub>) spectra of compound **4t**

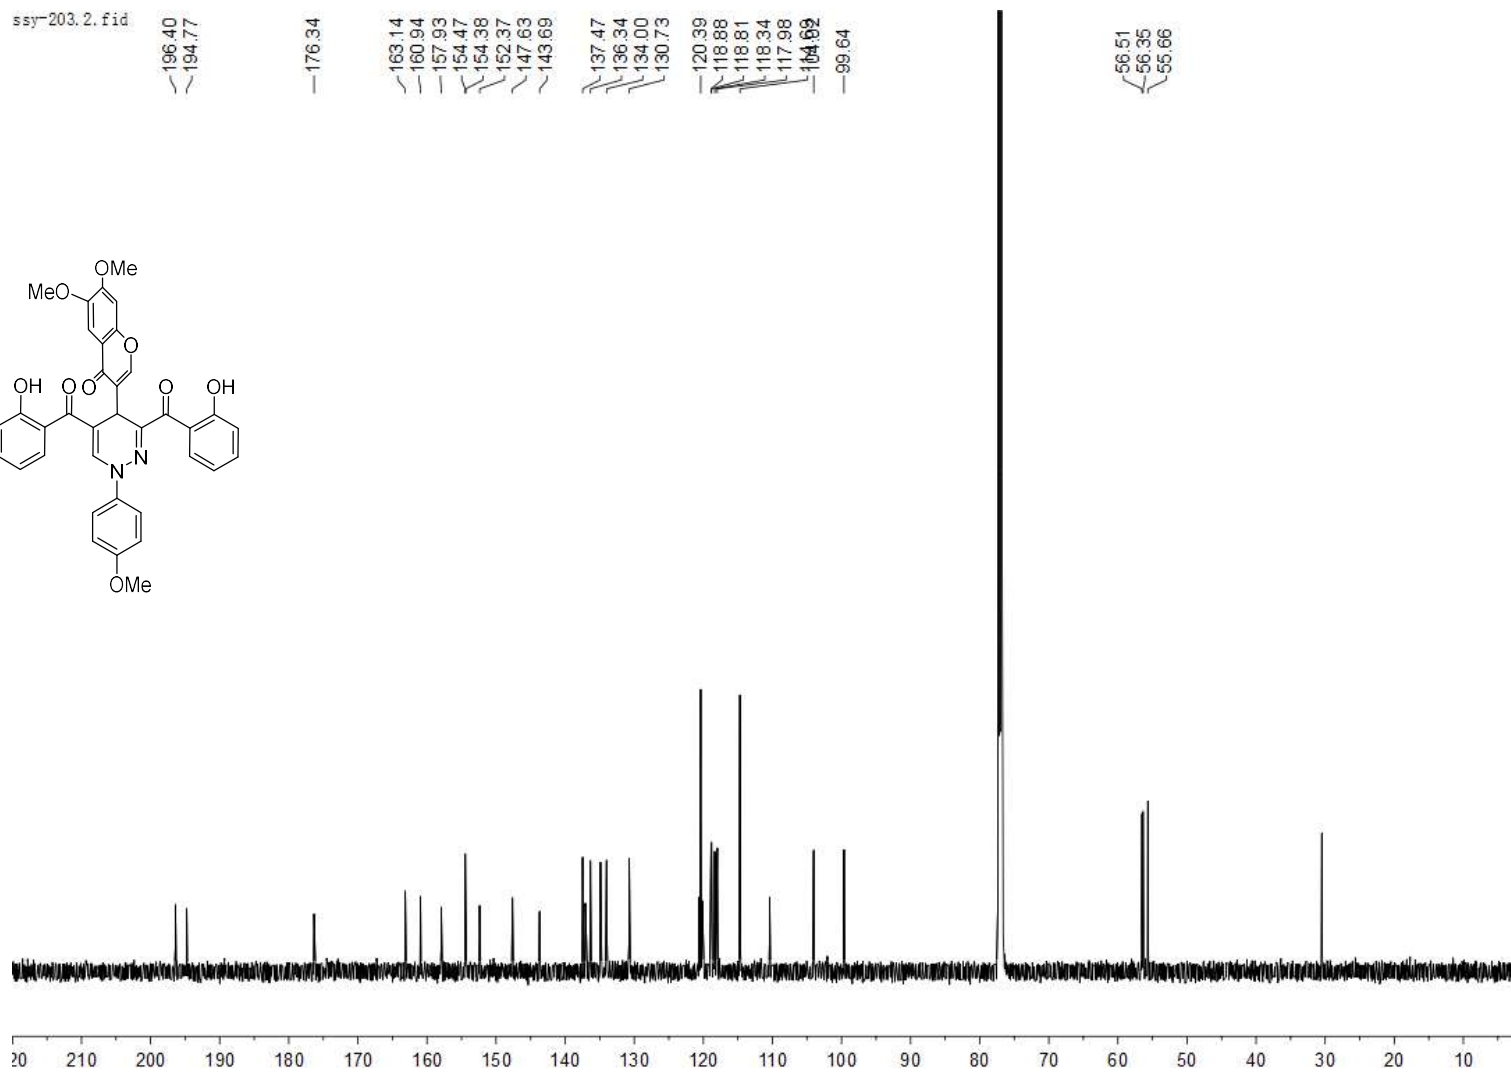

Figure S88.  $^{13}\text{C}$  NMR (150 MHz,  $\text{CDCl}_3$ ) spectra of compound **4t**

## 7. References and notes.

1. (a) Tingoli, M.; Mazzella, M.; Panunzi, B.; Tuzi, A. L-Proline-catalyzed activation of methyl ketones or active methylene compounds and DMF-DMA for syntheses of (2E)-3-dimethylamino-2-propen-1-ones. *Eur. J. Org. Chem.* **2011**, 2011, 399. (b) Das, B.; enkateswarlu, K.; Majhi, V.; Reddy, M. R.; Reddy, K. N.; Yerra Rao, K.; Ravikumar, K.; Sridhar, B. Highly efficient, mild and chemo- and stereoselective synthesis of enamionones and enamino esters using silica supported perchloric acid under solvent-free conditions. *J. Mol. Catal. A: Chem.* **2006**, 246, 276. (c) Liu, Y.; Zhou, R. Wan, J.-P. Water-promoted synthesis of enamionones. Mechanism investigation and application in multicomponent reactions. *Synth. Commun.* **2013**, 43, 2475.
2. Wu, J.; Gu, Y.; Leng, X.; Shen, Q. Copper-promoted sandmeyer difluoromethylthiolation of aryl and heteroaryl diazonium salts. *Angew. Chem. Int. Ed.* **2015**, 54, 7648.
3. Xie, P.; Fang Y.; Shen, Z.; Shao, Y.; Ma, Q.; Yang, Z.; Zhao, J.; Li, H.; Li, R.; Dong, S.; Wen, W.; Xia, X. Broad antiviral and anti-inflammatory activity of Qingwenjiere mixture against SARS-CoV-2 and other human coronavirus infections. *Phytomedicine* **2021**, 93, 153808.
4. Abraham, M. H.; Abraham, R. J.; Acree Jr, W. E.; Aliev, A. E.; Leo, A. J.; Whaley, W. L. An NMR method for the quantitative assessment of intramolecular hydrogen bonding; application to physicochemical, environmental, and biochemical properties. *J. Org. Chem.* **2014**, 79, 11075–11083.
5. CCDC 2286041 contain the supplementary crystallographic data for compound **3s**. These data can be obtained free of charge from The Cambridge Crystallographic Data Center via [www.ccdc.cam.ac.uk/data\\_request/cif](http://www.ccdc.cam.ac.uk/data_request/cif).
6. CCDC 2312821 contain the supplementary crystallographic data for compound **4j**. These data can be obtained free of charge from The Cambridge Crystallographic Data Center via [www.ccdc.cam.ac.uk/data\\_request/cif](http://www.ccdc.cam.ac.uk/data_request/cif).
